# Supplementary material for: Synthesis of 4-quinolones, benzopyran derivatives and other fused systems based on the domino ANRORC reactions of (ortho-fluoro)-3-benzoylchromones
Source: Royal Society of Chemistry journal article supplement (doi:10.1039/c5ra02978c), 2015-01-01
Supplement: c5ra02978c1.pdf [file c5ra02978c1.pdf]

## Supplementary Information

### Synthesis of 4-Quinolones, Benzopyran Derivatives and other Fused Systems Based on the Domino ANRORC Reactions of (*Ortho*-fluoro)-3-benzoylchromones.

Viktor O. Iaroshenko,<sup>a,b\*</sup> Satenik Mkrtchyan,<sup>a</sup> Ashot Gevorgyan,<sup>a</sup> Tatevik Grigoryan,<sup>a</sup> Alexander Villinger,<sup>a</sup> Peter Langer<sup>a,c\*</sup>

<sup>a</sup>*Institut für Chemie, Universität Rostock, Albert-Einstein-Str. 3a, 18059 Rostock, Germany;*

<sup>b</sup>*National Taras Shevchenko University, 62 Volodymyrska st., Kyiv-33, 01033, Ukraine;*

<sup>c</sup>*Leibniz-Institut für Katalyse e. V. an der Universität Rostock, Albert-Einstein-Str. 29a, 18059 Rostock, Germany.*

#### Table of Contents

|                                                                   |    |
|-------------------------------------------------------------------|----|
| (A) X-Ray data.....                                               | 2  |
| (B) Analytical data.....                                          | 7  |
| (C) Copies of <sup>1</sup> H and <sup>13</sup> C NMR spectra..... | 36 |

**(A) X-Ray data**

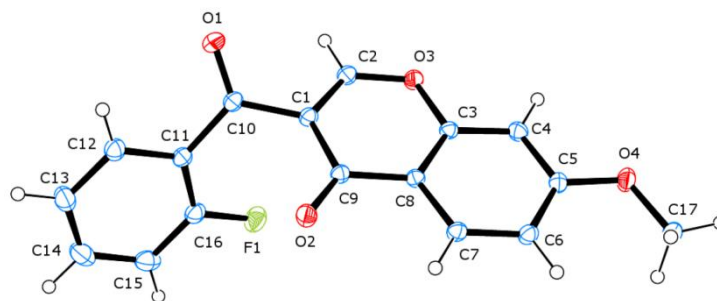

**Figure 1.** Crystal structure of compound **3e**.

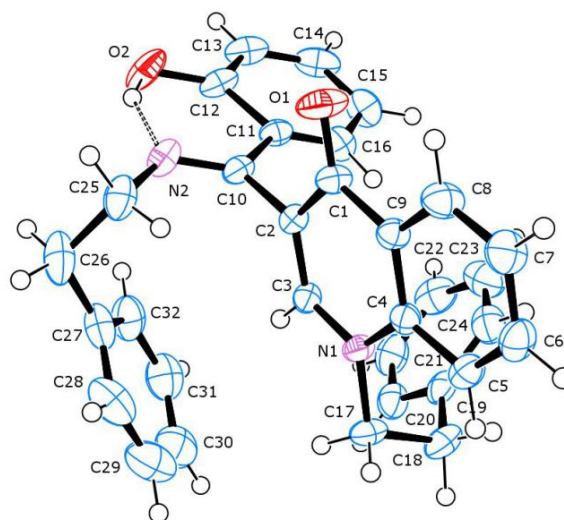

**Figure 2.** Crystal structure of compound **4a**.

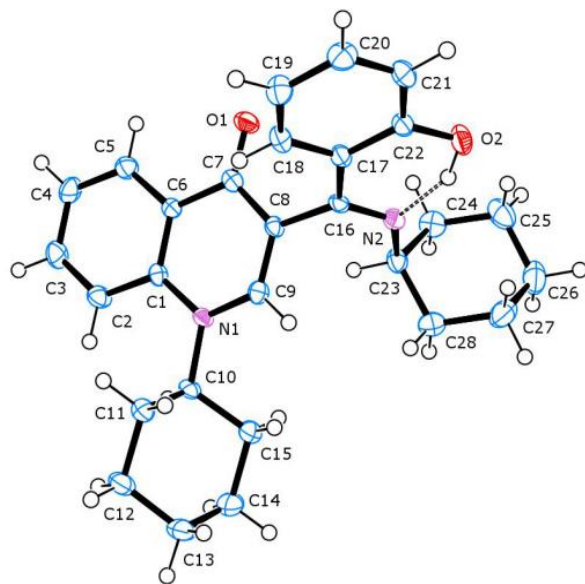

**Figure 3.** Crystal structure of compound **4b**.

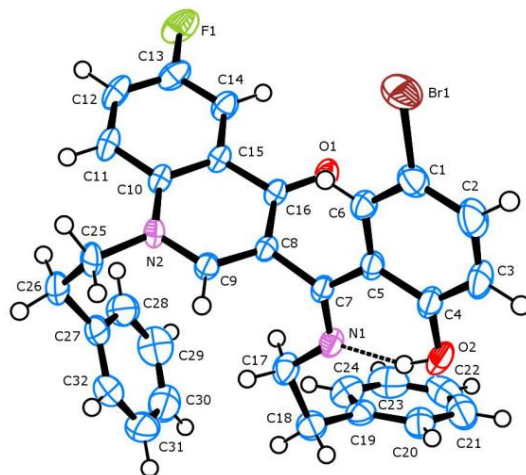

**Figure 4.** Crystal structure of compound **4j**.

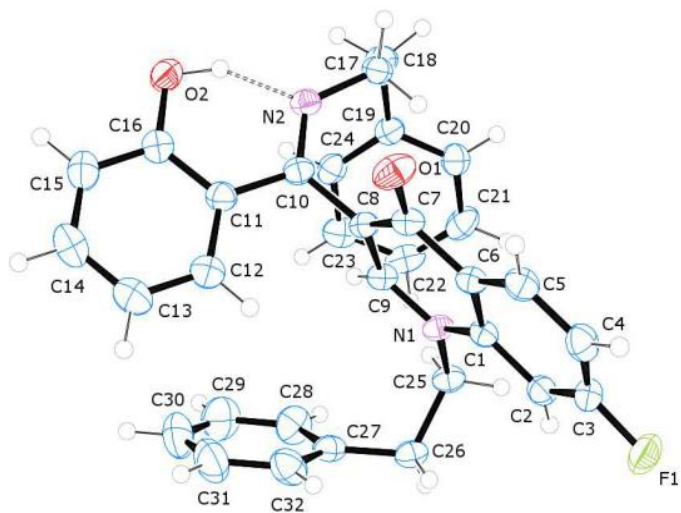

**Figure 5.** Crystal structure of compound **4l**.

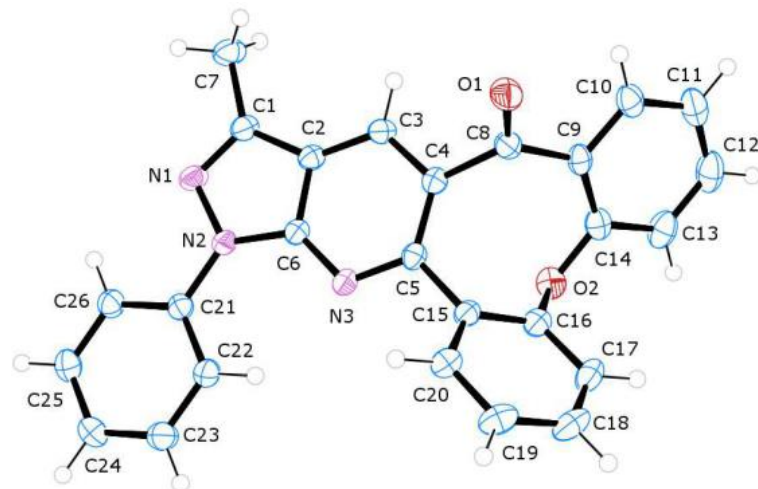

**Figure 6.** Crystal structure of compound **7a**.



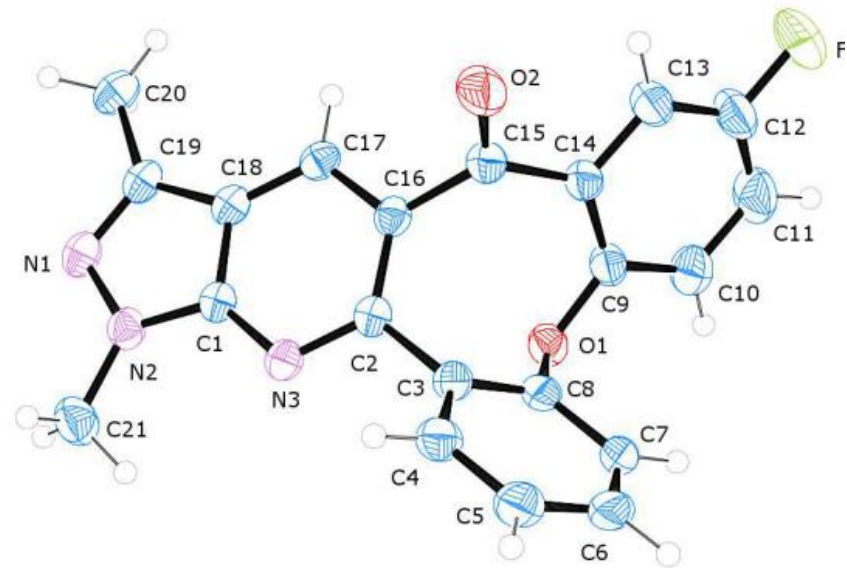

**Figure 7.** Crystal structure of compound 7c.

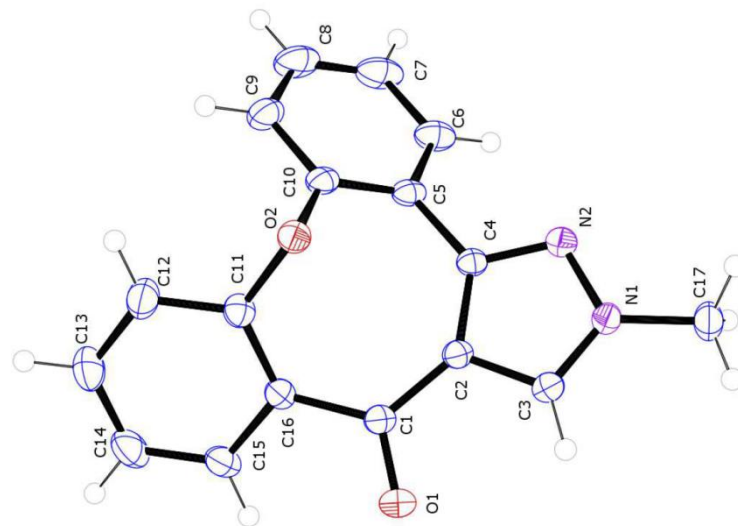

**Figure 8.** Crystal structure of compound 7e.

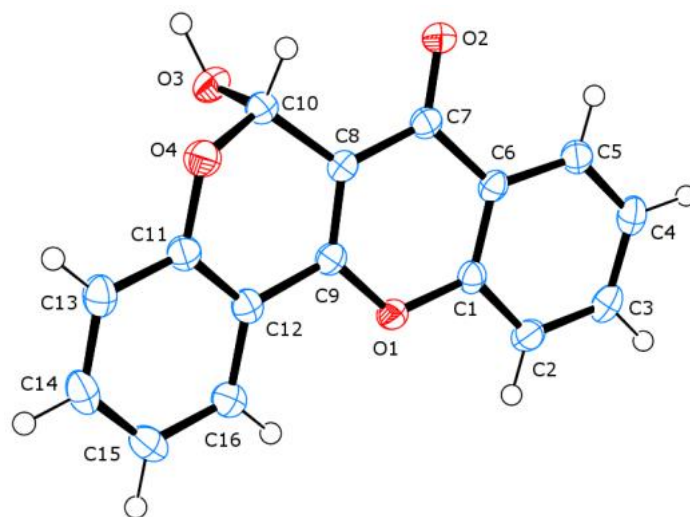

**Figure 9.** Crystal structure of compound **9a**.

## (B) Analytical data

Chromones **3a** and **3b** are known.<sup>1</sup>

- (a) Y. Zhao, T. F. Chow, R. S. Puckrin, S. E. Alfred, A. K. Korir, C. K. Larive, S. R. Cutler, *Nat. Chem. Biol.* **2007**, *3*, 716-721; (b) S. Yasuhara, T. Masumizu, T. Umeda, M. Kusunoki, S. Kutsuma, C. Oono, K. Iwashita, *jpn. kokai tokkyo koho* **1996**, JP 08193078 A 19960730.

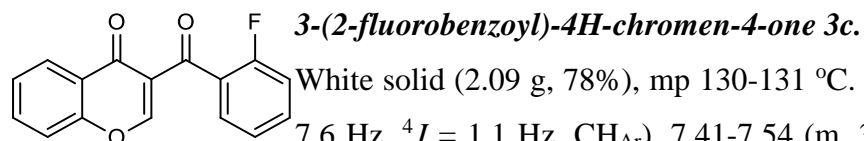

White solid (2.09 g, 78%), mp 130-131 °C. <sup>1</sup>H NMR (300 MHz, CDCl<sub>3</sub>): δ = 7.04-7.10 (m, 1H, CH<sub>Ar</sub>), 7.25 (dt, 1H, <sup>3</sup>J = 7.6 Hz, <sup>4</sup>J = 1.1 Hz, CH<sub>Ar</sub>), 7.41-7.54 (m, 3H, CH<sub>Ar</sub>), 7.68-7.76 (m, 2H, CH<sub>Ar</sub>), 8.20 (dt, 1H, <sup>3</sup>J = 7.8 Hz, <sup>4</sup>J = 1.7 Hz, CH<sub>Ar</sub>), 8.43 (s, 1H, CH<sub>Ar</sub>).

<sup>19</sup>F NMR (282 MHz, CDCl<sub>3</sub>): δ = -111.4 (CF).

<sup>13</sup>C NMR (75.5 MHz, CDCl<sub>3</sub>): δ = 115.7, 116.0, 118.3 (CH), 124.4 (d, J = 3.1 Hz, CH), 125.0, 125.8 (C), 126.2, 126.4 (CH), 127.4 (d, <sup>3</sup>J = 12.6 Hz, C), 130.5 (d, J = 2.4 Hz, CH), 156.0, 159.5 (CH), 162.1 (d, <sup>1</sup>J = 253.5 Hz, CF), 174.5, 188.7 (C).

MS (GC, 70eV): *m/z* (%) = 268 (M<sup>+</sup>, 1), 249 (100).

HRMS (EI): Calcd for C<sub>16</sub>H<sub>9</sub>FO<sub>3</sub> (M<sup>+</sup>) 268.05302. Found 268.05297.

IR (ATR, cm<sup>-1</sup>):  $\tilde{\nu}$  = 2922 (w), 1664 (m), 1642 (s), 1608 (s), 1563 (s), 1460 (s), 1388 (m), 1340 (m), 1300 (s), 1239 (m), 1207 (m), 1136 (m), 1099 (m), 973 (m), 864 (s), 757 (s), 706 (m), 629 (m).

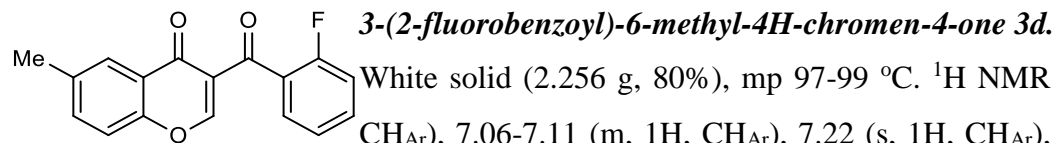

White solid (2.256 g, 80%), mp 97-99 °C. <sup>1</sup>H NMR (300 MHz, CDCl<sub>3</sub>): δ = 2.27 (s, 3H, Me), 6.86-6.93 (m, 1H, CH<sub>Ar</sub>), 7.06-7.11 (m, 1H, CH<sub>Ar</sub>), 7.22 (s, 1H, CH<sub>Ar</sub>), 7.31-7.39 (m, 2H, CH<sub>Ar</sub>), 7.56 (dt, 1H, <sup>3</sup>J = 7 Hz, <sup>4</sup>J = 2 Hz,

CH<sub>Ar</sub>), 7.81-7.82 (m, 1H, CH<sub>Ar</sub>), 8.24 (s, 1H, CH<sub>Ar</sub>).

<sup>19</sup>F NMR (282 MHz, CDCl<sub>3</sub>): δ = -111.4 (CF).

<sup>13</sup>C NMR (75.5 MHz, CDCl<sub>3</sub>): δ = 20.9 (Me), 115.8 (d, <sup>2</sup>J = 22.1 Hz, CH), 118.6 (CH), 124.4 (d, J = 3.4 Hz, CH), 125.3, 125.6 (C), 125.8 (CH), 127.4 (d, <sup>3</sup>J = 12.7 Hz, C), 130.4 (d, J = 1.9 Hz, CH), 134.3 (d, <sup>3</sup>J = 8.8 Hz, CH), 135.6 (CH), 136.4, 154.3 (C), 159.4 (CH), 161.2 (d, <sup>1</sup>J = 254.7 Hz, CF), 174.6, 188.9 (C).

MS (GC, 70eV): m/z (%) = 282 (M<sup>+</sup>, 70), 263 (42), 253 (100), 235 (39), 187 (25), 135 (28), 95 (38).

HRMS (EI): Calcd for C<sub>17</sub>H<sub>11</sub>FO<sub>3</sub> (M<sup>+</sup>) 282.06867. Found 282.06832.

IR (ATR, cm<sup>-1</sup>):  $\tilde{\nu}$  = 1660 (m), 1612 (s), 1555 (m), 1478 (s), 1452 (m), 1372 (w), 1311 (S), 1216 (m), 1154 (w), 1127 (w), 1103 (m), 978 (w), 941 (w), 908 (m), 863 (m), 820 (m), 802 (m), 781 (s), 766 (s), 637 (s).

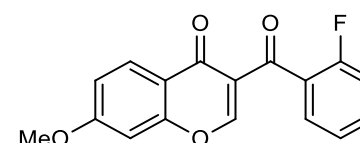**3-(2-fluorobenzoyl)-7-methoxy-4H-chromen-4-one 3e.**  
Light brown solid (2.041 g, 88%), mp 154-155 °C. <sup>1</sup>H NMR (300 MHz, CDCl<sub>3</sub>): δ = 3.90 (s, 3H, OMe), 6.89 (d, 1H, <sup>4</sup>J = 2.4 Hz, CH<sub>Ar</sub>), 6.97-7.09 (m, 2H, CH<sub>Ar</sub>), 7.22-7.27 (m, 1H, CH<sub>Ar</sub>), 7.48-7.56 (m, 1H, CH<sub>Ar</sub>), 7.72 (dt, 1H, <sup>3</sup>J = 7.6 Hz, <sup>4</sup>J = 1.7 Hz, CH<sub>Ar</sub>), 8.10 (d, 1H, <sup>3</sup>J = 8.9 Hz, CH<sub>Ar</sub>), 8.35 (s, 1H, CH<sub>Ar</sub>).

<sup>19</sup>F NMR (282 MHz, CDCl<sub>3</sub>): δ = -111.4 (CF).

<sup>13</sup>C NMR (75.5 MHz, CDCl<sub>3</sub>): δ = 54.9 (OMe), 100.6 (CH), 115.4 (d, <sup>2</sup>J = 22.3 Hz, CH), 115.9 (CH), 118.4 (C), 124.2 (d, J = 3.2 Hz, CH), 125.7 (C), 127.4 (d, <sup>3</sup>J = 13.5 Hz, C), 127.6 (CH), 130.3 (d, J = 3.1 Hz, CH), 134.2 (d, <sup>3</sup>J = 9.7 Hz, CH), 158.1 (CH), 160.2 (d, <sup>1</sup>J = 254.1 Hz, CF), 172.9, 187.9 (C).

MS (GC, 70eV): m/z (%) = 298 (M<sup>+</sup>, 61), 279 (35), 269 (100), 251 (28), 151 (25).

HRMS (EI): Calcd for C<sub>17</sub>H<sub>11</sub>FO<sub>4</sub> (M<sup>+</sup>) 298.06359. Found 298.06287.

IR (ATR, cm<sup>-1</sup>):  $\tilde{\nu}$  = 2852 (w), 1683 (m), 1569 (m), 1613 (s), 1454 (m), 1390 (w), 1356 (w), 1313 (m), 1278 (s), 1203 (m), 1163 (m), 1135 (m), 1089 (m), 1024 (m), 867 (m), 844 (m), 777 (s), 749 (s), 649 (m), 572 (m).

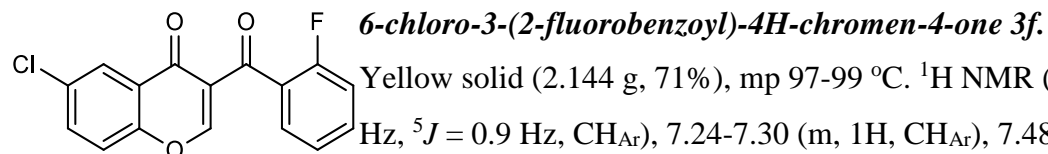

Yellow solid (2.144 g, 71%), mp 97-99 °C. <sup>1</sup>H NMR (300 MHz, CDCl<sub>3</sub>): δ = 7.07 (ddd, 1H, <sup>3</sup>J = 10.7 Hz, <sup>4</sup>J = 8.3 Hz, <sup>5</sup>J = 0.9 Hz, CH<sub>Ar</sub>), 7.24-7.30 (m, 1H, CH<sub>Ar</sub>), 7.48 (d, 1H, <sup>3</sup>J = 8.9 Hz, CH<sub>Ar</sub>), 7.50-7.58 (m, 1H, CH<sub>Ar</sub>), 7.65 (dd, 1H, <sup>3</sup>J = 8.9 Hz, <sup>4</sup>J = 2.6 Hz, CH<sub>Ar</sub>), 7.72-7.77 (m, 1H, CH<sub>Ar</sub>), 8.16 (d, 1H, <sup>4</sup>J = 2.6 Hz, CH<sub>Ar</sub>), 8.41 (s, 1H, CH<sub>Ar</sub>).

<sup>19</sup>F NMR (282 MHz, CDCl<sub>3</sub>): δ = -111.2 (CF).

<sup>13</sup>C NMR (75.5 MHz, CDCl<sub>3</sub>): δ = 115.9 (d, <sup>2</sup>J = 21.8 Hz, CH), 120.0 (CH), 124.5 (d, J = 3.4 Hz, CH), 125.8 (CH), 128.9 (C), 127.1 (d, <sup>3</sup>J = 10.9 Hz, C), 130.5 (CH), 132.3 (C), 134.5, 134.6 (CH), 154.3 (C), 159.4 (CH), 161.2 (d, <sup>1</sup>J = 253.7 Hz, CF), 173.4, 188.1 (C).

MS (GC, 70eV): *m/z* (%) = 302 (M<sup>+</sup>, 69), 273 (100), 255 (35), 207 (32), 155 (31), 123 (69), 95 (51).

HRMS (EI): Calcd for C<sub>16</sub>H<sub>8</sub>ClFO<sub>3</sub> (M<sup>+</sup>) 303.98664. Found 303.98572.

IR (ATR, cm<sup>-1</sup>):  $\tilde{\nu}$  = 3056 (w), 1644 (s), 1608 (s), 1560 (m), 1482 (w), 1463 (s), 1436 (m), 1335 (m), 1315 (s), 1260 (m), 1211 (m), 1140 (m), 1101 (m), 1037 (w), 985 (m), 951 (m), 887 (m), 863 (m), 835 (m), 820 (s), 783 (s), 761 (s), 735 (m), 674 (m), 631 (s).

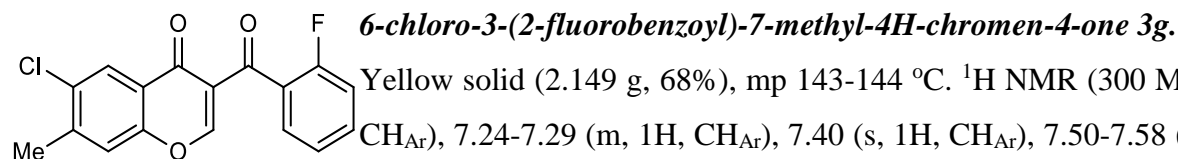

Yellow solid (2.149 g, 68%), mp 143-144 °C. <sup>1</sup>H NMR (300 MHz, CDCl<sub>3</sub>): δ = 2.51 (s, 3H, Me), 7.03-7.10 (m, 1H, CH<sub>Ar</sub>), 7.24-7.29 (m, 1H, CH<sub>Ar</sub>), 7.40 (s, 1H, CH<sub>Ar</sub>), 7.50-7.58 (m, 1H, CH<sub>Ar</sub>), 7.74 (dt, 1H, <sup>3</sup>J = 7.5 Hz, <sup>4</sup>J = 1.8 Hz, CH<sub>Ar</sub>), 8.15 (s, 1H, CH<sub>Ar</sub>), 8.38 (s, 1H, CH<sub>Ar</sub>).

<sup>19</sup>F NMR (282 MHz, CDCl<sub>3</sub>): δ = -117.3 (CF).

<sup>13</sup>C NMR (75.5 MHz, CDCl<sub>3</sub>): δ = 20.9 (Me), 100.6 (CH), 115.9 (d, <sup>2</sup>J = 22.6 Hz, CH), 120.1 (CH), 124.0 (C), 124.4 (d, J = 2.8 Hz, CH), 125.7 (C), 126.1 (CH), 127.2 (d, <sup>3</sup>J = 12.2 Hz, C), 130.5 (d, J = 2.0 Hz, CH), 132.9 (C), 134.5 (d, <sup>3</sup>J = 7.9 Hz, CH), 143.9, 154.3 (C), 161.2 (d, <sup>1</sup>J = 253.6 Hz, CF), 173.3, 188.4 (C).

MS (GC, 70eV): *m/z* (%) = 316 (M<sup>+</sup>, 65), 287 (100), 269 (34), 221 (21), 169 (25), 123 (36), 95 (39).

HRMS (EI): Calcd for C<sub>17</sub>H<sub>10</sub>O<sub>3</sub>FCl (M<sup>+</sup>) 316.02970. Found 316.02908.

IR (ATR,  $\text{cm}^{-1}$ ):  $\tilde{\nu}$  = 3040 (w), 1651 (s), 1620 (s), 1547 (m), 1486 (w), 1452 (s), 1412 (m), 1334 (m), 1308 (s), 1259 (m), 1226 (m), 1183 (m), 1145 (m), 1126 (m), 1104 (m), 1039 (w), 1003 (m), 966 (m), 934 (w), 910 (m), 871 (s), 797 (m), 768 (s), 750 (s), 704 (w), 667 (m), 638 (s).

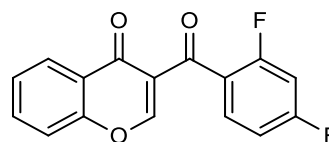

**3-(2,4-difluorobenzoyl)-4H-chromen-4-one 3h.**

Brown solid (1.71 g, 60%), mp 138-140 °C.  $^1\text{H}$  NMR (300 MHz,  $\text{CDCl}_3$ ):  $\delta$  = 6.78-7.03 (m, 3H,  $\text{CH}_{\text{Ar}}$ ), 7.43-7.55 (m, 1H,  $\text{CH}_{\text{Ar}}$ ), 7.70-7.82 (m, 1H,  $\text{CH}_{\text{Ar}}$ ), 8.03-8.10 (m, 1H,  $\text{CH}_{\text{Ar}}$ ), 8.20-8.23 (m, 1H,  $\text{CH}_{\text{Ar}}$ ), 8.44 (s, 1H,  $\text{CH}_{\text{Ar}}$ ).

$^{19}\text{F}$  NMR (282 MHz,  $\text{CDCl}_3$ ):  $\delta$  = -106.0 (d,  $^3J$  = 13.1 Hz, CF), -102.0 (d,  $^3J$  = 13.1 Hz, CF).

$^{13}\text{C}$  NMR (75.5 MHz,  $\text{CDCl}_3$ ):  $\delta$  = 104.3 (t,  $^2J$  = 25.9 Hz, CH), 112.0 (dd,  $^2J$  = 21.7 Hz,  $J$  = 3.8 Hz, CH), 118.3 (CH), 124.0 (dd,  $^3J$  = 12.6 Hz,  $J$  = 3.8 Hz, C), 124.8, 125.7 (C), 126.2, 126.3 (CH), 132.3 (dd,  $^3J$  = 10.6 Hz,  $J$  = 3.8 Hz, CH), 138.4 (CH), 156.0 (C), 159.5 (CH), 161.9 (dd,  $^1J$  = 237.8 Hz,  $^3J$  = 12.6 Hz, CF), 165.9 (dd,  $^1J$  = 237.8 Hz,  $^3J$  = 12.6 Hz, CF), 174.4 (d,  $J$  = 2.2 Hz, C=O), 187.3 (C=O).

MS (GC, 70eV):  $m/z$  (%) = 286 ( $\text{M}^+$ , 85), 267 (48), 257 (100), 239 (57), 173 (30), 141 (45).

HRMS (EI): Calcd for  $\text{C}_{16}\text{H}_8\text{F}_2\text{O}_3$  ( $\text{M}^+$ ) 286.04360. Found 286.04384.

IR (ATR,  $\text{cm}^{-1}$ ):  $\tilde{\nu}$  = 3080 (w), 1640 (s), 1609 (s), 1487 (w), 1464 (s), 1426 (m), 1384 (m), 1348 (m), 1294 (m), 1213 (m), 1138 (m), 1096 (s), 1028 (w), 977 (m), 855 (s), 802 (w), 757 (s), 662 (m), 302 (m).

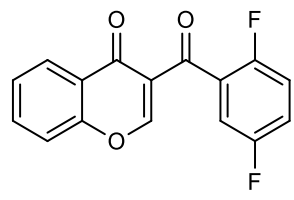

**3-(2,5-difluorobenzoyl)-4H-chromen-4-one 3i.**

Yellow solid (2.29 g, 80%), mp 138-140 °C.  $^1\text{H}$  NMR (300 MHz,  $\text{CDCl}_3$ ):  $\delta$  = 7.00-7.08 (m, 1H,  $\text{CH}_{\text{Ar}}$ ), 7.17-7.23 (m, 1H,  $\text{CH}_{\text{Ar}}$ ), 7.38-7.54 (m, 2H,  $\text{CH}_{\text{Ar}}$ ), 7.70-7.75 (m, 2H,  $\text{CH}_{\text{Ar}}$ ), 8.20 (dd, 1H,  $^3J$  = 8.0 Hz,  $^4J$  = 1.6 Hz,  $\text{CH}_{\text{Ar}}$ ), 8.45 (s, 1H,  $\text{CH}_{\text{Ar}}$ ).

$^{19}\text{F}$  NMR (282 MHz,  $\text{CDCl}_3$ ):  $\delta$  = -117.9 (d,  $J$  = 17.7 Hz, CF), -117.2 (d,  $J$  = 17.7 Hz, CF).

$^{13}\text{C}$  NMR (75.5 MHz,  $\text{CDCl}_3$ ):  $\delta$  = 116.6 (dd,  $^2J$  = 25.5 Hz,  $J$  = 3.3 Hz, CH), 117.2 (dd,  $^2J$  = 25.5 Hz,  $J$  = 8.2 Hz, CH), 118.3 (CH), 120.7 (dd,  $^2J$  = 25.5 Hz,  $J$  = 9.4 Hz, CH), 124.9, 125.3 (C), 126.3 (d,  $J$  = 5.3 Hz, CH), 128.4 (dd,  $J$  = 16.7 Hz,  $J$  = 7.3 Hz, CH), 134.5 (CH), 156.0 (C), 157.1 (d,  $^1J$  = 247.2 Hz, CF), 158.6 (d,  $J$  = 242.2 Hz, CF), 159.8 (CH), 174.4, 187.6 (C).

MS (GC, 70eV):  $m/z$  (%) = 286 ( $M^+$ , 80), 267 (57), 257 (100), 239 (66), 173 (35), 141 (22), 121 (39).

HRMS (EI): Calcd for  $C_{16}H_8F_2O_3$  ( $M^+$ ) 286.04360. Found 286.043440.

IR (ATR,  $cm^{-1}$ ):  $\tilde{\nu}$  = 3068 (w), 1636 (s), 1614 (m), 1566 (m), 1483 (m), 1461 (s), 1422 (m), 1392 (m), 1344 (m), 1316 (m), 1287 (w), 1260 (m), 1230 (m), 1186 (s), 1131 (m), 1000 (w), 961 (w), 929 (w), 891 (m), 833 (s), 773 (s), 750 (s), 700 (m), 637 (m), 591 (w), 540 (m).

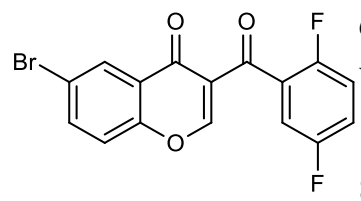

**6-bromo-3-(2,5-difluorobenzoyl)-4H-chromen-4-one 3j.**

White solid (2.73 g, 67%), mp 153-155 °C.  $^1H$  NMR (300 MHz,  $CDCl_3$ ):  $\delta$  = 7.00-7.08 (m, 1H,  $CH_{Ar}$ ), 7.17-7.27 (m, 1H,  $CH_{Ar}$ ), 7.38-7.44 (m, 2H,  $CH_{Ar}$ ), 7.80 (dd, 1H,  $^3J$  = 8.0 Hz,  $^4J$  = 2.5 Hz,  $CH_{Ar}$ ), 8.31 (d, 1H,  $^4J$  = 3 Hz,  $CH_{Ar}$ ), 8.42 (s, 1H,  $CH_{Ar}$ ).

$^{19}F$  NMR (282 MHz,  $CDCl_3$ ):  $\delta$  = -117.7 (d,  $J$  = 18 Hz, CF), -117.0 (d,  $J$  = 18 Hz, CF).

$^{13}C$  NMR (75.5 MHz,  $CDCl_3$ ):  $\delta$  = 116.6 (dd,  $^2J$  = 25.6 Hz,  $J$  = 3.3 Hz, CH), 117.2 (dd,  $^2J$  = 25.6 Hz,  $J$  = 8.7 Hz, CH), 119.9 (C), 120.2 (CH), 121.0 (dd,  $^2J$  = 25.6 Hz,  $J$  = 8.6 Hz, CH), 125.4, 126.1 (C), 128.0 (dd,  $^3J$  = 14.3 Hz,  $J$  = 7.2 Hz, C), 129.0 (CH), 137.5 (CH), 154.8 (C), 157.2 (d,  $^1J$  = 248.4 Hz, CF), 158.6 (d,  $^1J$  = 280.1 Hz, CF), 159.7 (CH), 173.1 (d,  $J$  = 2.3 Hz, C=O), 187.0 (C=O).

MS (GC, 70eV):  $m/z$  (%) = 366 ( $M^+$ , 91), 365 (35), 347 (69), 346 (12), 337 (100), 336 (48), 335 (95), 319 (68), 317 (64), 251 (36), 199 (32), 141 (50), 113 (62).

HRMS (EI): Calcd for  $C_{16}H_7F_2O_3Br$  ( $M^+$ ) 363.95411. Found 363.954477.

IR (ATR,  $cm^{-1}$ ):  $\tilde{\nu}$  = 3067 (w), 1645 (s), 1606 (m), 1557 (m), 1488 (m), 1459 (s), 1423 (m), 1372 (w), 1329 (m), 1307 (m), 1278 (m), 1251 (m), 1192 (m), 1177 (s), 1126 (m), 1093 (m), 1062 (w), 1005 (w), 932 (w), 893 (m), 878 (m), 824 (s), 804 (s), 769 (m), 750 (s), 676 (s), 640 (m), 603 (m), 539 (m).

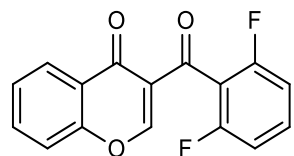

**3-(2,6-difluorobenzoyl)-4H-chromen-4-one 3k.**

White solid (1.859 g, 65%), mp 114-116 °C.  $^1H$  NMR (300 MHz,  $CDCl_3$ ):  $\delta$  = 6.92-6.99 (m, 2H,  $CH_{Ar}$ ), 7.37-7.48 (m, 2H,  $CH_{Ar}$ ), 7.51-7.54 (m, 1H,  $CH_{Ar}$ ), 7.69-7.75 (m, 1H,  $CH_{Ar}$ ), 8.19 (dd, 1H,  $^3J$  = 7.9 Hz,  $^4J$  = 1.5 Hz,  $CH_{Ar}$ ), 8.64 (s, 1H,

CH<sub>Ar</sub>).

<sup>19</sup>F NMR (282 MHz, CDCl<sub>3</sub>): δ = -113.1 (CF).

<sup>13</sup>C NMR (75.5 MHz, CDCl<sub>3</sub>): δ = 111.7 (dd, <sup>2</sup>J = 22.8 Hz, J = 2.6 Hz, CH), 118.3 (C), 123.8, 125.1, 126.4 (CH), 132.4 (t, <sup>3</sup>J = 10.4 Hz, CH), 134.5 (CH), 155.9 (C), 160.1 (dd, <sup>1</sup>J = 252.6 Hz, J = 6.5 Hz, CF), 161.6 (CH), 174.2, 185.1 (C).

MS (GC, 70eV): *m/z* (%) = 286 (M<sup>+</sup>, 75), 267 (44), 257 (27), 239 (100), 173 (30), 141 (28), 121 (28).

HRMS (EI): Calcd for C<sub>16</sub>H<sub>8</sub>F<sub>2</sub>O<sub>3</sub> (M<sup>+</sup>) 286.04361. Found 286.043442.

IR (ATR, cm<sup>-1</sup>):  $\tilde{\nu}$  = 3074 (w), 1674 (m), 1656 (s), 1611 (m), 1552 (m), 1459 (s), 1384 (m), 1307 (m), 1286 (m), 1265 (m), 1232 (m), 1206 (m), 1144 (m), 994 (s), 964 (s), 865 (m), 789 (s), 760 (s), 717 (s), 680 (m), 591 (m).

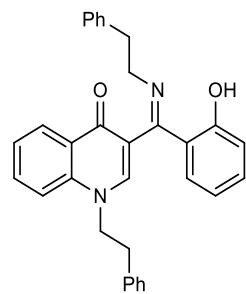

**(Z)-3-((2-hydroxyphenyl)(phenethylimino)methyl)-1-phenethylquinolin-4(1H)-one 4a.**

Yellow solid (0.349 g, 74%), mp 172-174 °C. <sup>1</sup>H NMR (300 MHz, DMSO-*d*<sub>6</sub>): δ = 2.85-2.90 (m, 2H, CH<sub>2</sub>), 3.10-3.14 (m, 2H, CH<sub>2</sub>), 3.34-3.52 (m, 2H, CH<sub>2</sub>), 4.55-4.63 (m, 2H, CH<sub>2</sub>), 6.62 (t, 1H, <sup>3</sup>J = 7.5 Hz, CH<sub>Ar</sub>), 6.76-6.83 (m, 2H, CH<sub>Ar</sub>), 7.07-7.30 (m, 11H, CH<sub>Ar</sub>), 7.50 (t, 1H, <sup>3</sup>J = 7.6 Hz, CH<sub>Ar</sub>), 7.64 (s, 1H, CH<sub>Ar</sub>), 7.84-8.00 (m, 2H, CH<sub>Ar</sub>), 8.25 (d, 1H, <sup>3</sup>J = 7.6 Hz, CH<sub>Ar</sub>), 15.4 (s, 1H, OH).

<sup>13</sup>C NMR (75.5 MHz, DMSO-*d*<sub>6</sub>): δ = 34.0, 36.1, 52.3, 53.4 (CH<sub>2</sub>), 113.1 (C), 117.1, 117.2, 117.3 (CH), 119.4 (C), 124.1, 126.0, 126.2, 126.6, 128.3, 128.4, 128.7, 128.9, 130.6, 132.0, 132.6 (CH), 137.2, 139.2, 139.7 (C), 143.5 (CH), 162.3, 169.6, 172.9 (C).

MS (GC, 70eV): *m/z* (%) = 472 (M<sup>+</sup>, 100), 455 (20), 381 (18), 367 (35), 354 (98), 262 (26), 105 (97).

HRMS (ESI): Calcd for C<sub>32</sub>H<sub>29</sub>N<sub>2</sub>O<sub>2</sub> (M+H) 473.22336. Found 473.22235.

IR (ATR, cm<sup>-1</sup>):  $\tilde{\nu}$  = 3027 (w), 1712 (w), 1660 (w), 1623 (m), 1605 (m), 1598 (m), 1553 1486 (m), 1451 (m), 1375 (m), 1338 (m), 1307 (m), 1229 (m), 1183 (m), 1149 (m), 1082 (m), 1000 (m), 926 (m), 855 (m), 742 (s), 694 (s), 627 (m), 559 (m).



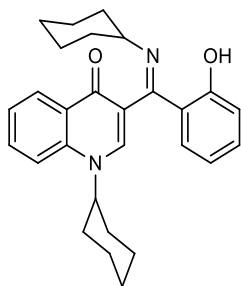

**(Z)-1-cyclohexyl-3-((cyclohexylimino)(2-hydroxyphenyl)methyl)quinolin-4(1H)-one 4b.**

Yellow solid (0.214 g, 50%), mp 230-231 °C. <sup>1</sup>H NMR (300 MHz, DMSO-*d*<sub>6</sub>): δ = 1.20-1.80 (m, 21H, cyclohexyl), 4.73 (br. s, 1H, cyclohexyl), 6.64 (t, 1H, <sup>3</sup>J = 8.1 Hz, CH<sub>Ar</sub>), 6.86 (d, 1H, <sup>3</sup>J = 8.1 Hz, CH<sub>Ar</sub>), 6.86 (d, 1H, <sup>3</sup>J = 8.1 Hz, CH<sub>Ar</sub>), 7.25 (t, 1H, <sup>3</sup>J = 7.1 Hz, CH<sub>Ar</sub>), 7.47 (t, 1H, <sup>3</sup>J = 7.1 Hz, CH<sub>Ar</sub>), 7.83 (t, 1H, <sup>3</sup>J = 8.1 Hz, CH<sub>Ar</sub>), 8.06 (d, 1H, <sup>3</sup>J = 9.1 Hz, CH<sub>Ar</sub>), 8.22-8.29 (m, 2H, CH<sub>Ar</sub>), 16.09 (s, 1H, OH).

<sup>13</sup>C NMR (75.5 MHz, DMSO-*d*<sub>6</sub>): δ = 23.4, 24.6, 25.1, 25.2, 31.4, 31.6, 32.9, 33.4 (cyclohexyl CH<sub>2</sub>), 57.7, 58.8 (cyclohexyl CH), 113.9 (C), 116.4, 117.1, 117.5 (CH), 119.8 (C), 123.8, 126.2 (CH), 128.2 (C), 130.5, 131.9, 132.6, 138.9 (CH), 139.9, 163.1, 167.7, 172.9 (C).

MS (GC, 70eV): *m/z* (%) = 428 (M<sup>+</sup>, 90), 411 (26), 345 (27), 332 (100), 250 (35), 220 (18), 171 (14).

HRMS (EI): Calcd for C<sub>28</sub>H<sub>32</sub>N<sub>2</sub>O<sub>2</sub> (M<sup>+</sup>) 428.24638. Found 428.24655.

IR (ATR, cm<sup>-1</sup>):  $\tilde{\nu}$  = 3307 (w), 2922 (m), 2848 (w), 1626 (m), 1582 (m), 1554 (m), 1486 (m), 1445 (w), 1361 (m), 1309 (w), 1257 (w), 1216 (m), 1190 (w), 1150 (w), 1099 (w), 1002 (w), 913 (w), 889 (m), 859 (w), 838 (w), 750 (s), 709 (m), 635 (w), 575 (w), 534 (w).

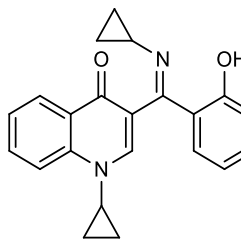

**(Z)-1-cyclopropyl-3-((cyclopropylimino)(2-hydroxyphenyl)methyl)quinolin-4(1H)-one 4c.**

Yellow viscous oil (0.165 g, 48%). <sup>1</sup>H NMR (300 MHz, DMSO-*d*<sub>6</sub>): δ = 0.84-1.06 (m, 4H, cyclopropyl, CH<sub>2</sub>), 1.24-1.31 (m, 4H, cyclopropyl, CH<sub>2</sub>), 2.84-2.94 (m, 1H, cyclopropyl CH), 3.44-3.51 (m, 1H, cyclopropyl CH), 6.64 (t, 1H, <sup>3</sup>J = 7.2 Hz, CH<sub>Ar</sub>), 6.89 (d, 1H, <sup>3</sup>J = 7.7 Hz, CH<sub>Ar</sub>), 7.04-7.07 (m, 1H, CH<sub>Ar</sub>), 7.14-7.20 (m, 1H, CH<sub>Ar</sub>), 7.41-7.47 (m, 1H, CH<sub>Ar</sub>), 7.71-7.78 (m, 2H, CH<sub>Ar</sub>), 7.99 (d, 1H, <sup>3</sup>J = 8.6 Hz, CH<sub>Ar</sub>), 8.47 (d, 1H, <sup>3</sup>J = 8.3 Hz, CH<sub>Ar</sub>), 14.51 (s, 1H, OH).

<sup>13</sup>C NMR (62.9 MHz, DMSO-*d*<sub>6</sub>): δ = 7.8, 10.0 (cyclopropyl CH<sub>2</sub>), 33.9, 34.0 (CH), 114.3 (C), 116.8, 117.4, 117.1 (CH), 120.1 (C), 124.1, 125.8 (CH), 125.9 (C), 130.3, 131.3, 132.3 (CH), 141.3 (C), 142.8 (CH), 161.0, 167.6, 173.4 (C).

MS (GC, 70eV): *m/z* (%) = 344 (M<sup>+</sup>, 4), 238 (100), 221 (18), 147 (76), 121 (43).

HRMS (ESI): Calcd for C<sub>22</sub>H<sub>21</sub>N<sub>2</sub>O<sub>2</sub> (M+H) 345.15975. Found 345.16062.

IR (ATR,  $\text{cm}^{-1}$ ):  $\tilde{\nu} = 2922$  (w), 1620 (m), 1586 (s), 1480 (s), 1401 (w), 1339 (m), 1247 (m), 1166 (m), 1113 (w), 1035 (w), 943 (w), 866 (w), 752 (s), 704 (m), 644 (m).

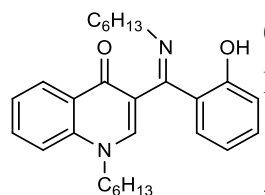

**(Z)-1-hexyl-3-((hexylimino)(2-hydroxyphenyl)methyl)quinolin-4(1H)-one 4d.**

Brown viscous oil (0.281 g, 65%).  $^1\text{H}$  NMR (300 MHz,  $\text{CDCl}_3$ ):  $\delta = 0.53$ -0.60 (m, 6H, hexyl), 0.94-1.12 (m, 12H, hexyl), 1.37-1.63 (m, 4H, hexyl), 3.19 (br.s, 2H,  $\text{CH}_2$  hexyl), 3.88 (t, 2H,  $^3J = 7.1$  Hz,  $\text{CH}_2$ ), 6.30-6.35 (m, 1H,  $\text{CH}_{\text{Ar}}$ ), 6.70 (d, 1H,  $^3J = 8.3$  Hz,  $\text{CH}_{\text{Ar}}$ ), 6.83 (dd, 1H,  $^3J = 8.0$  Hz,  $^4J = 1.7$  Hz,  $\text{CH}_{\text{Ar}}$ ), 6.92-6.97 (m, 1H,  $\text{CH}_{\text{Ar}}$ ), 7.16-7.26 (m, 3H,  $\text{CH}_{\text{Ar}}$ ), 7.44-7.50 (m, 1H,  $\text{CH}_{\text{Ar}}$ ), 8.23 (dd, 1H,  $^3J = 8.1$  Hz,  $^4J = 1.5$  Hz,  $\text{CH}_{\text{Ar}}$ ), 15.6 (s, 1H, OH).

$^{13}\text{C}$  NMR (75.5 MHz,  $\text{CDCl}_3$ ):  $\delta = 13.8$ , 14.0 (Me), 22.4, 22.5, 26.4, 27.1, 28.8, 30.5, 31.2, 31.5, 51.2, 53.7 ( $\text{CH}_2$ ), 114.8 (C), 115.6, 116.8, 118.5 (CH), 119.6 (C), 124.4 (CH), 127.1 (C), 127.7, 130.4, 132.3, 132.6 (CH), 139.3 (C), 142.6 (CH), 164.6, 168.2, 174.0 (C).

MS (GC, 70eV):  $m/z$  (%) = 432 ( $\text{M}^+$ , 74), 375 (100), 334 (72), 248 (28).

HRMS (EI): Calcd for  $\text{C}_{28}\text{H}_{36}\text{N}_2\text{O}_2$  ( $\text{M}^+$ ) 432.27713. Found 432.27756.

IR (ATR,  $\text{cm}^{-1}$ ):  $\tilde{\nu} = 3038$  (w), 2924 (s), 2854 (m), 1621 (s), 1603 (s), 1577 (s), 1552 (s), 1489 (s), 1451 (m), 1413 (m), 1389 (m), 1345 (m), 1311 (m), 1269 (m), 1232 (s), 1176 (m), 1152 (m), 1055 (w), 966 (w), 864 (w), 824 (w), 786 (w), 753 (s), 706 (m), 660 (w), 625 (w), 529 (w).

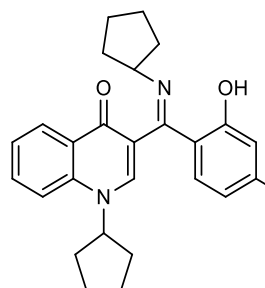

**(Z)-1-cyclopentyl-3-((cyclopentylimino)(2-hydroxy-4-methoxyphenyl)methyl)quinolin-4(1H)-one 4e.**

Yellow solid (0.237 g, 55%), mp 220-222  $^\circ\text{C}$ .  $^1\text{H}$  NMR (300 MHz,  $\text{DMSO}-d_6$ ):  $\delta = 1.56$ -2.03 (m, 14H, cyclopentyl), 2.27-2.36 (m, 2H, cyclopentyl), 3.76 (s, 3H, OMe), 3.83-3.90 (m, 1H, NCH), 4.97-5.04 (m, 1H, NCH), 6.09 (dd, 1H,  $^3J = 8.8$  Hz,  $^4J = 2.4$  Hz,  $\text{CH}_{\text{Ar}}$ ), 6.35 (d, 1H,  $^4J = 2.6$  Hz,  $\text{CH}_{\text{Ar}}$ ), 6.88 (d, 1H,  $^3J = 9.0$  Hz,  $\text{CH}_{\text{Ar}}$ ), 7.43-7.49 (m, 1H,  $\text{CH}_{\text{Ar}}$ ), 7.59 (s, 1H,  $\text{CH}_{\text{Ar}}$ ), 7.68-7.79 (m, 2H,  $\text{CH}_{\text{Ar}}$ ), 8.52-8.56 (m, 1H,  $\text{CH}_{\text{Ar}}$ ), 15.8 (br. s, 1H, OH).

$^{13}\text{C}$  NMR (75.5 MHz,  $\text{DMSO}-d_6$ ):  $\delta = 23.8$ , 24.2, 24.3, 32.2, 32.3, 32.4, 34.2, 35.1 (cyclopentyl  $\text{CH}_2$ ), 55.2 (OMe), 60.2, 61.0 (cyclopentyl CH), 102.3, 105.5 (CH), 112.6, 114.6 (C), 115.6, 124.4 (CH), 127.3 (C), 127.9, 131.8, 132.6, 138.1 (CH), 140.4, 164.2, 166.4, 171.6, 173.8 (C).

MS (GC, 70eV):  $m/z$  (%) = 430 ( $M^+$ , 67), 413 (35), 399 (23), 361 (21), 348 (100), 293 (35), 251 (23), 168 (35).

HRMS (EI): Calcd for  $C_{27}H_{30}N_2O_3$  ( $M^+$ ) 430.22509. Found 430.22451.

IR (ATR,  $cm^{-1}$ ):  $\tilde{\nu}$  = 2952 (w), 2859 (w), 1581 (s), 1552 (m), 1514 (w), 1485 (m), 1444 (m), 1412 (w), 1345 (m), 1281 (w), 1208 (s), 1169 (m), 1119 (m), 1100 (m), 1035 (m), 957 (m), 856 (w), 831 (m), 796 (m), 752 (s), 708 (m), 645 (w).

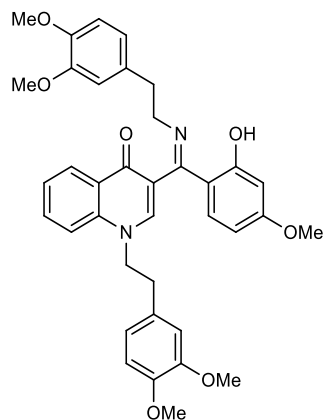

**(Z)-1-(3,4-dimethoxyphenethyl)-3-(((3,4-dimethoxyphenethyl)imino)(2-hydroxy-4-methoxyphenyl)methyl)quinolin-4(1H)-one 4f.**

Yellow solid (0.473 g, 76%), mp 91-93 °C.  $^1H$  NMR (300 MHz,  $CDCl_3$ ):  $\delta$  = 2.85-3.18 (m, 4H,  $2 \times CH_2$ ), 3.28-3.44 (m, 1H,  $CH_2$ ), 3.60 (s, 3H, OMe), 3.70 (s, 3H, OMe), 3.76 (s, 3H, OMe), 3.77 (s, 3H, OMe), 3.80 (s, 3H, OMe), 3.82-3.86 (m, 1H,  $CH_2$ ), 3.91-4.02 (m, 1H,  $CH_2$ ), 4.36-4.50 (m, 1H,  $CH_2$ ), 6.02 (dd, 1H,  $^3J = 8.9$  Hz,  $^4J = 2.5$  Hz,  $CH_{Ar}$ ), 6.33 (d, 1H,  $^4J = 2.5$  Hz,  $CH_{Ar}$ ), 6.40-6.73 (m, 8H,  $CH_{Ar}$ ), 7.45-7.61 (m, 2H,  $CH_{Ar}$ ), 7.74-7.81 (m, 1H,  $CH_{Ar}$ ), 8.50 (dd, 1H,  $^3J = 8.0$  Hz,  $^4J = 1.5$  Hz,  $CH_{Ar}$ ), 16.0 (br. s, 1H, OH).

$^{13}C$  NMR (75.5 MHz,  $CDCl_3$ ):  $\delta$  = 34.2, 36.4, 51.1, 54.8 ( $CH_2$ ), 55.1, 55.5, 55.7, 55.8, 55.9 (OMe), 102.2, 105.3, 111.2, 111.7, 111.8 (CH), 112.3 (C), 112.4 (CH), 113.8 (C), 115.6, 120.6, 121.1, 124.6 (CH), 127.0 (C), 127.9 (CH), 128.6 (C), 131.8 (CH), 132.3 (C), 132.8 (CH), 139.0 (C), 143.2 (CH), 147.3, 148.7, 149.3, 164.2, 167.7, 171.0, 173.9 (C).

MS (GC, 70eV):  $m/z$  (%) = 622 ( $M^+$ , 26), 458 (80), 444 (46), 292 (39), 165 (100).

HRMS (EI): Calcd for  $C_{37}H_{38}N_2O_7$  ( $M^+$ ) 622.26735. Found 622.26549.

IR (ATR,  $cm^{-1}$ ):  $\tilde{\nu}$  = 2934 (w), 1589 (m), 1550 (m), 1513 (s), 1488 (m), 1462 (m), 1415 (m), 1344 (w), 1260 (s), 1232 (s), 1138 (s), 1060 (w), 1024 (s), 840 (m), 808 (m), 762 (s), 707 (w), 641 (w).

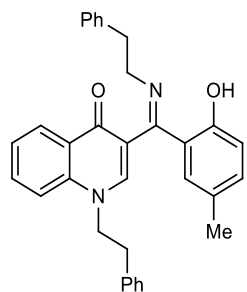

**(Z)-3-((2-hydroxy-5-methylphenyl)(phenethylimino)methyl)-1-phenethylquinolin-4(1H)-one 4g.**

Yellow solid (0.360 g, 74%), mp 172-174 °C. <sup>1</sup>H NMR (300 MHz, CDCl<sub>3</sub>): δ = 2.07 (s, 3H, Me), 2.91-3.17 (m, 4H, 2xCH<sub>2</sub>), 3.29-3.39 (m, 1H, CH<sub>2</sub>), 3.68-3.77 (m, 1H, CH<sub>2</sub>), 4.19-4.41 (m, 2H, CH<sub>2</sub>), 6.65 (s, 1H, CH<sub>Ar</sub>), 6.71-6.73 (m, 1H, CH<sub>Ar</sub>), 6.81-6.87 (m, 1H, CH<sub>Ar</sub>), 6.99-7.01 (m, 3H, CH<sub>Ar</sub>), 7.05-7.32 (m, 8H, CH<sub>Ar</sub>), 7.46 (t, 1H, <sup>3</sup>J = 7.5 Hz, CH<sub>Ar</sub>), 7.57 (t, 1H, <sup>3</sup>J = 8.5 Hz, CH<sub>Ar</sub>), 7.73-7.79 (m, 1H, CH<sub>Ar</sub>), 8.50 (dd, 1H, <sup>3</sup>J = 8.1 Hz, <sup>3</sup>J = 1.7 Hz, CH<sub>Ar</sub>), 14.9 (br. s, 1H, OH).

<sup>13</sup>C NMR (75.5 MHz, CDCl<sub>3</sub>): δ = 20.5 (Me), 34.8, 36.9, 53.1, 54.5 (CH<sub>2</sub>), 114.9 (C), 115.5, 117.6 (CH), 119.3 (C), 124.3, 126.0 (CH), 126.8 (C), 127.2, 127.6, 128.3, 128.5, 128.9, 129.0, 130.2, 132.7, 133.0 (CH), 136.4, 139.2, 139.9 (C), 142.0 (CH), 160.9, 168.5, 174.1 (C).

MS (GC, 70eV): *m/z* (%) = 486 (M<sup>+</sup>, 25), 368 (22), 261 (14), 236 (25), 207 (18), 105 (27).

HRMS (EI): Calcd for C<sub>33</sub>H<sub>31</sub>N<sub>2</sub>O<sub>2</sub> (M+H) 487.238. Found 487.23816.

IR (ATR, cm<sup>-1</sup>):  $\tilde{\nu}$  = 2920 (w), 1621 (m), 1576 (s), 1551 (m), 1487 (s), 1454 (m), 1414 (w), 1377 (m), 1345 (m), 1284 (m), 1229 (m), 1149 (m), 1083 (w), 1029 (w), 903 (w), 821 (m), 748 (s), 698 (s).

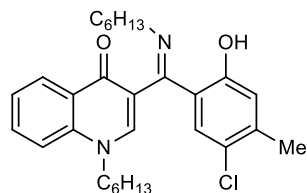

**(Z)-3-((5-chloro-2-hydroxy-4-methylphenyl)(hexylimino)methyl)-1-hexylquinolin-4(1H)-one 4h.**

Yellow solid (0.331 g, 69%), mp 128-130 °C. <sup>1</sup>H NMR (300 MHz, DMSO-*d*<sub>6</sub>): δ = 0.79-0.87 (m, 6H, hexyl), 1.20-1.37 (m, 12H, hexyl), 1.61-1.72 (m, 2H, hexyl), 1.87 (br.s, 2H, CH<sub>2</sub>), 2.24 (s, 3H, Me), 3.22-3.33 (m, 1H, CH<sub>2</sub>), 3.51-3.62 (m, 1H, CH<sub>2</sub>), 4.16 (t, 2H, <sup>3</sup>J = 7.0 Hz, CH<sub>2</sub>), 6.78 (s, 1H, CH<sub>Ar</sub>), 7.02 (s, 1H, CH<sub>Ar</sub>), 7.41-7.52 (m, 3H, CH<sub>Ar</sub>), 7.70-7.77 (m, 1H, CH<sub>Ar</sub>), 8.46 (dd, 1H, <sup>3</sup>J = 8.0 Hz, <sup>4</sup>J = 1.5 Hz, CH<sub>Ar</sub>), 15.9 (br. s, 1H, OH).

<sup>13</sup>C NMR (75.5 MHz, DMSO-*d*<sub>6</sub>): δ = 13.8, 13.9, 20.2 (Me), 22.3, 22.4, 26.3, 27.0, 28.8, 30.3, 31.2, 31.5 (CH<sub>2</sub>), 114.0 (C), 115.7 (CH), 118.4 (C), 120.8, 121.7, 124.5 (CH), 127.1 (C), 127.6, 129.7, 132.7 (CH), 139.3, 140.8 (C), 142.6 (CH), 163.7, 167.3, 173.9 (C).

MS (GC, 70eV): *m/z* (%) = 480 (M<sup>+</sup>, 69), 463 (23), 423 (100), 382 (63), 179 (16).

HRMS (ESI): Calcd for C<sub>29</sub>H<sub>37</sub>N<sub>2</sub>O<sub>2</sub>Cl (M+H) 481.26163. Found 481.26226.

IR (ATR,  $\text{cm}^{-1}$ ):  $\tilde{\nu}$  = 3041 (w), 2926 (m), 2855 (w), 1623 (m), 1599 (s), 1577 (s), 1552 (m), 1490 (s), 1461 (m), 1384 (m), 1271 (w), 1231 (s), 1168 (s), 1135 (w), 1055 (w), 1008 (w), 965 (w), 883 (w), 858 (m), 795 (w), 763 (s), 732 (w), 708 (m), 690 (m), 626 (w), 576 (w).

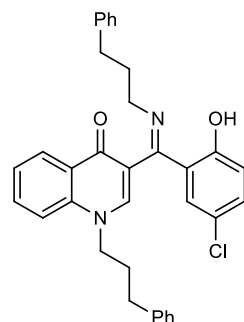

**(Z)-3-((5-chloro-2-hydroxyphenyl)((3-phenylpropyl)imino)methyl)-1-(3-phenylpropyl)quinolin-4(1H)-one 4i.**

Orange solid (0.441 g, 77%), mp 87-89 °C.  $^1\text{H}$  NMR (300 MHz,  $\text{CDCl}_3$ ):  $\delta$  = 2.00-2.32 (m, 4H, 2x $\text{CH}_2$ ), 2.71-2.77 (m, 4H, 2x $\text{CH}_2$ ), 3.30-3.41 (m, 1H,  $\text{CH}_2$ ), 3.58-3.71 (m, 1H,  $\text{CH}_2$ ), 4.07-4.22 (m, 2H,  $\text{CH}_2$ ), 6.94 (d, 1H,  $^3J$  = 8.9 Hz,  $\text{CH}_{\text{Ar}}$ ), 7.07-7.40 (m, 14H,  $\text{CH}_{\text{Ar}}$ ), 7.45-7.51 (m, 1H,  $\text{CH}_{\text{Ar}}$ ), 7.67-7.77 (m, 1H,  $\text{CH}_{\text{Ar}}$ ), 8.51 (dd, 1H,  $^3J$  = 8.1 Hz,  $^4J$  = 1.6 Hz,  $\text{CH}_{\text{Ar}}$ ), 15.4 (s, 1H, OH).

$^{13}\text{C}$  NMR (75.5 MHz,  $\text{CDCl}_3$ ):  $\delta$  = 30.0, 31.7, 32.5, 33.3, 50.5, 52.7 ( $\text{CH}_2$ ), 114.2 (C), 115.6, 120.0 (CH), 120.3, 121.4 (C), 124.6, 125.7, 126.6 (CH), 127.0 (C), 127.7, 128.2, 128.4, 128.7, 129.4, 132.2, 132.8 (CH), 139.3, 139.4, 141.3 (C), 142.2 (CH), 163.0, 167.9, 173.8 (C).

MS (GC, 70eV):  $m/z$  (%) = 534 ( $\text{M}^+$ , 13), 443 (100), 430 (14), 91 (47).

HRMS (EI): Calcd for  $\text{C}_{34}\text{H}_{31}\text{N}_2\text{O}_2\text{Cl}$  ( $\text{M}+\text{H}$ ) 535.21468. Found 535.21473.

IR (ATR,  $\text{cm}^{-1}$ ):  $\tilde{\nu}$  = 3025 (w), 2924 (w), 1623 (s), 1600 (s), 1576 (s), 1552 (m), 1487 (s), 1415 (w), 1379 (m), 1328 (w), 1287 (m), 1226 (m), 1173 (m), 1087 (w), 1029 (w), 983 (w), 883 (w), 822 (m), 745 (s), 697 (s), 647 (m), 529 (w).

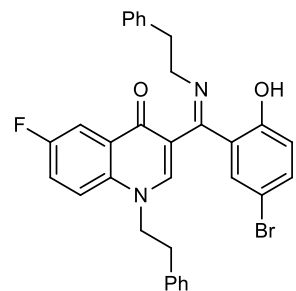

**(Z)-3-((5-bromo-2-hydroxyphenyl)(phenethylimino)methyl)-6-fluoro-1-phenethylquinolin-4(1H)-one 4j.**

Yellow solid (0.274 g, 48%), mp 200-202 °C.  $^1\text{H}$  NMR (300 MHz,  $\text{DMSO}-d_6$ ):  $\delta$  = 2.93-3.11 (m, 4H, 2x $\text{CH}_2$ ), 3.26-3.37 (m, 1H,  $\text{CH}_2$ ), 3.66-3.76 (m, 1H,  $\text{CH}_2$ ), 4.25 (t, 2H,  $^3J$  = 6.8 Hz,  $\text{CH}_2$ ), 6.49 (s, 1H,  $\text{CH}_{\text{Ar}}$ ), 6.81 (d, 1H,  $^3J$  = 8.8 Hz,  $\text{CH}_{\text{Ar}}$ ), 6.96-6.97 (m, 2H,  $\text{CH}_{\text{Ar}}$ ), 6.98-6.99 (m, 1H,  $\text{CH}_{\text{Ar}}$ ), 7.11-7.28 (m, 9H,  $\text{CH}_{\text{Ar}}$ ), 7.48-7.58 (m, 2H,  $\text{CH}_{\text{Ar}}$ ), 8.11 (dd, 1H,  $^3J$  = 8.6 Hz,  $^4J$  = 2.6 Hz,  $\text{CH}_{\text{Ar}}$ ), 15.57 (br. s, 1H, OH).

$^{19}\text{F}$  NMR (282 MHz,  $\text{DMSO}-d_6$ ):  $\delta$  = -115.4 (CF).

$^{13}\text{C}$  NMR (75.5 MHz,  $\text{DMSO-}d_6$ ):  $\delta = 34.9, 36.8, 53.2, 55.0$  ( $\text{CH}_2$ ), 108.7 (C), 112.5 (d,  $J = 23$  Hz, CH), 113.2 (C), 117.9 (d,  $J = 8$  Hz, CH), 120.2 (CH), 120.9 (C), 121.5 (d,  $J = 26$  Hz, CH), 126.3, 127.5, 128.4, 128.5, 129.1, 132.3, 135.0 (CH), 135.7, 136.1, 139.5 (C), 142.0 (CH), 159.5 (d,  $J = 249$  Hz, CF), 162.6, 167.5, 173.1 (C).

MS (GC, 70eV):  $m/z$  (%) = 570 ( $\text{M}^+$ , 30), 568 (32), 450 (31), 360 (32), 310 (35), 105 (100).

HRMS (EI): Calcd for  $\text{C}_{32}\text{H}_{26}\text{N}_2\text{O}_2\text{FBr}$  ( $\text{M}^+$ ) 568.11562. Found 568.11507.

IR (ATR,  $\text{cm}^{-1}$ ):  $\tilde{\nu} = 2919$  (w), 1619 (m), 1581 (m), 1556 (m), 1489 (m), 1380 (m), 1332 (m), 1281 (m), 1226 (m), 1169 (m), 1081 (w), 1056 (w), 999 (w), 925 (w), 895 (w), 818 (m), 786 (w), 748 (m), 698 (w), 565 (m).

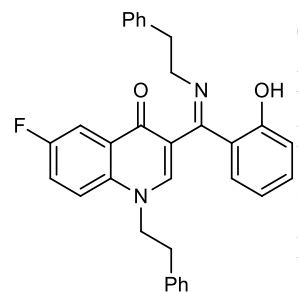

***(Z)-6-fluoro-3-((2-hydroxyphenyl)(phenethylimino)methyl)-1-phenethylquinolin-4(1H)-one 4k.***

Brown viscous oil (0.382 g, 78%).  $^1\text{H}$  NMR (300 MHz,  $\text{CDCl}_3$ ):  $\delta = 2.99$  (t, 2H,  $^3J = 6.9$  Hz,  $\text{CH}_2$ ), 3.10 (t, 2H,  $^3J = 6.9$  Hz,  $\text{CH}_2$ ), 3.56 (br. s, 1H,  $\text{CH}_2$ ), 3.66-3.76 (m, 1H,  $\text{CH}_2$ ), 4.26 (t, 2H,  $^3J = 6.4$  Hz,  $\text{CH}_2$ ), 6.53-6.59 (m, 2H,  $\text{CH}_{\text{Ar}}$ ), 6.70-6.73 (m, 1H,  $\text{CH}_{\text{Ar}}$ ), 6.93-6.97 (m, 3H,  $\text{CH}_{\text{Ar}}$ ), 7.12-7.27 (m, 9H,  $\text{CH}_{\text{Ar}}$ ), 7.47-7.59 (m, 2H,  $\text{CH}_{\text{Ar}}$ ), 8.15 (dd, 1H,  $^3J = 8.7$  Hz,  $^4J = 2.7$  Hz,  $\text{CH}_{\text{Ar}}$ ), 15.32 (br. s, 1H, OH).

$^{19}\text{F}$  NMR (282 MHz,  $\text{CDCl}_3$ ):  $\delta = -116.3$  (CF).

$^{13}\text{C}$  NMR (75.5 MHz,  $\text{CDCl}_3$ ):  $\delta = 34.8, 36.7, 53.2, 55.1$  ( $\text{CH}_2$ ), 108.7 (C), 112.6 (d,  $^2J = 23.4$  Hz, CH), 114.0 (C), 117.4 (CH), 117.8 (d,  $^3J = 8$  Hz, CH), 118.0 (CH), 119.5 (C), 121.3 (d,  $^2J = 25.6$  Hz, CH), 126.1, 127.5, 128.4 (d,  $^3J = 11.3$  Hz, CH), 129.1 (d,  $J = 3.0$  Hz, CH), 130.3, 132.2 (CH), 135.6, 136.1, 139.9 (C), 142.3 (CH), 159.4 (d,  $^1J = 247.7$  Hz, CF), 163.3, 168.1, 173.2 (C).

MS (GC, 70eV):  $m/z$  (%) = 490 ( $\text{M}^+$ , 33), 385 (13), 372 (32), 315 (19), 283 (18), 105 (28), 73 (100).

HRMS (EI): Calcd for  $\text{C}_{32}\text{H}_{27}\text{N}_2\text{O}_2\text{F}$  ( $\text{M}+\text{H}$ ) 491.21293. Found 491.21309.

IR (ATR,  $\text{cm}^{-1}$ ):  $\tilde{\nu} = 3388$  (w), 3025 (w), 2927 (w), 1602 (m), 1560 (m), 1490 (s), 1453 (m), 1380 (m), 1335 (m), 1281 (m), 1224 (m), 1175 (m), 1151 (m), 1083 (w), 1030 (w), 895 (m), 815 (m), 748 (s), 697 (s).

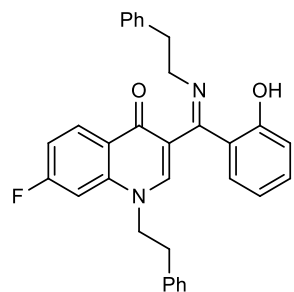

**(Z)-7-fluoro-3-((2-hydroxyphenyl)(phenethylimino)methyl)-1-phenethylquinolin-4(1H)-one 4l.**

Yellow solid (0.196 g, 40%), mp 201-203 °C. <sup>1</sup>H NMR (300 MHz, CDCl<sub>3</sub>): δ = 2.96-3.01 (m, 2H, CH<sub>2</sub>), 3.07-3.11 (m, 2H, CH<sub>2</sub>), 3.30-3.39 (m, 1H, CH<sub>2</sub>), 3.73-3.82 (m, 1H, CH<sub>2</sub>), 4.07-4.28 (m, 2H, CH<sub>2</sub>), 6.46 (s, 1H, CH<sub>Ar</sub>), 6.53-6.59 (m, 1H, CH<sub>Ar</sub>), 6.72 (dd, 1H, <sup>3</sup>J = 7.9 Hz, <sup>4</sup>J = 1.5 Hz, CH<sub>Ar</sub>), 6.90-6.98 (m, 3H, CH<sub>Ar</sub>), 7.12-7.27 (m, 11H, CH<sub>Ar</sub>), 8.47-8.53 (m, 1H, CH<sub>Ar</sub>), 15.47 (br. s, 1H, OH).

<sup>19</sup>F NMR (282 MHz, CDCl<sub>3</sub>): δ = -103.8 (CF).

<sup>13</sup>C NMR (75.5 MHz, CDCl<sub>3</sub>): δ = 34.5, 37.0, 53.3, 55.0 (CH<sub>2</sub>), 101.7 (d, J = 25.8 Hz, CH), 113.2 (d, J = 23.2 Hz, CH), 115.2 (C), 117.7 (d, J = 38.6 Hz, CH), 119.6, 123.6 (C), 126.1, 127.5, 128.4, 128.6, 128.7, 129.1, 129.2, 130.3 (CH), 131.0 (d, J = 10.1 Hz, CH), 132.2 (CH), 139.9 (C), 140.6 (d, J = 11.7 Hz, C), 142.6, 163.2 (C), 165.4 (d, J = 251.4 Hz, CF), 168.0, 173.4 (C).

MS (GC, 70eV): m/z (%) = 490 (M<sup>+</sup>, 13), 434 (12), 403 (20), 373 (14), 347 (52), 315 (100), 283 (67).

HRMS (EI): Calcd for C<sub>32</sub>H<sub>27</sub>N<sub>2</sub>O<sub>2</sub>F (M+H) 491.21293. Found 491.21247.

IR (ATR, cm<sup>-1</sup>):  $\tilde{\nu}$  = 1633 (m), 1608 (m), 1495 (w), 1463 (m), 1374 (w), 1330 (w), 1305 (w), 1249 (s), 1187 (w), 1148 (m), 1118 (w), 1084 (w), 1024 (w), 925 (w), 849 (m), 745 (s), 700 (s).

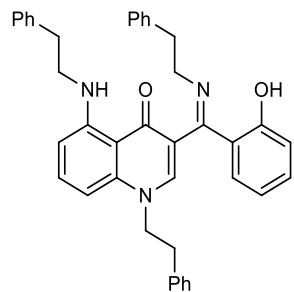

**(Z)-3-((2-hydroxyphenyl)(phenethylimino)methyl)-1-phenethyl-5-(phenethylamino)quinolin-4(1H)-one 4m.**

Yellow viscous oil (0.252 g, 41%). <sup>1</sup>H NMR (300 MHz, CDCl<sub>3</sub>): δ = 2.96-3.13 (m, 6H, 3xCH<sub>2</sub>), 3.37-3.46 (m, 4H, 2xCH<sub>2</sub>), 4.09 (br. s, 1H, CH<sub>2</sub>), 4.55-4.63 (m, 1H, CH<sub>2</sub>), 6.28 (s, 1H, CH<sub>Ar</sub>), 6.42 (d, 1H, <sup>3</sup>J = 7.5 Hz, CH<sub>Ar</sub>), 6.53-6.59 (m, 2H, CH<sub>Ar</sub>), 6.78-6.81 (m, 1H, CH<sub>Ar</sub>), 6.90-7.00 (m, 3H, CH<sub>Ar</sub>), 7.12-7.31 (s, 14H, CH<sub>Ar</sub>), 7.46 (t, 1H, <sup>3</sup>J = 8.4 Hz, CH<sub>Ar</sub>), 10.32 (t, 1H, <sup>3</sup>J = 4.6 Hz, NH), 15.57 (br. s, 1H, OH).

<sup>13</sup>C NMR (75.5 MHz, CDCl<sub>3</sub>): δ = 34.1, 35.3, 37.0, 44.9, 53.0, 55.5 (CH<sub>2</sub>), 99.5, 103.0 (CH), 111.9, 114.7 (C), 117.2, 118.0 (CH), 119.6 (C), 126.1, 126.3, 127.2, 128.3, 128.4, 128.6, 128.7, 129.0, 129.2, 130.5, 132.1, 133.9, 136.6 (CH), 139.4, 139.9 (C), 140.9 (CH), 141.7, 152.3, 163.5, 168.7, 177.8 (C).

MS (GC, 70eV):  $m/z$  (%) = 591 ( $M^+$ , 16), 500 (15), 396 (18), 105 (15), 43 (100).

HRMS (ESI): Calcd for  $C_{40}H_{38}N_3O_2$  ( $M+H$ ) 592.29585. Found 592.29622.

IR (ATR,  $cm^{-1}$ ):  $\tilde{\nu}$  = 3207 (w), 3026 (w), 2922 (w), 2851 (w), 1631 (m), 1596 (m), 1570 (m), 1513 (m), 1469 (m), 1452 (m), 1303 (m), 1268 (m), 1186 (m), 1152 (m), 1080 (w), 908 (w), 850 (w), 796 (w), 746 (s), 697 (s).

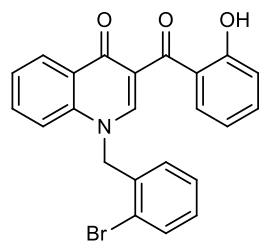

**1-(2-bromobenzyl)-3-(2-hydroxybenzoyl)quinolin-4(1H)-one 4n.**

Brown viscous oil (0.225 g, 52%).  $^1H$  NMR (300 MHz,  $DMSO-d_6$ ):  $\delta$  = 5.68 (br. s, 2H,  $CH_2$ ), 6.84-6.94 (m, 3H,  $CH_{Ar}$ ), 7.27-7.34 (m, 2H,  $CH_{Ar}$ ), 7.39-7.49 (m, 3H,  $CH_{Ar}$ ), 7.57 (dd, 1H,  $^3J$  = 7.8 Hz,  $^4J$  = 1.6 Hz,  $CH_{Ar}$ ), 7.69-7.77 (m, 2H,  $CH_{Ar}$ ), 8.26 (dd, 1H,  $^3J$  = 8.0 Hz,  $^4J$  = 1.5 Hz,  $CH_{Ar}$ ), 8.60 (br. s, 1H,  $CH_{Ar}$ ), 11.02 (s, 1H, OH).

$^{13}C$  NMR (75.5 MHz,  $DMSO-d_6$ ):  $\delta$  = 55.8 ( $CH_2$ ), 116.7, 117.2, 118.8 (CH), 120.9, 121.7, 123.5 (C), 124.8, 126.4, 127.5 (CH), 127.8 (C), 128.3, 129.8, 132.1, 133.0, 133.1, 134.6 (CH), 139.4 (C), 147.6 (CH), 159.1, 173.7, 196.4 (C).

MS (GC, 70eV):  $m/z$  (%) = 433 ( $M^+$ , 33), 385 (13).

HRMS (EI): Calcd for  $C_{23}H_{16}BrNO_3$  ( $M^+$ ) 433.03136. Found 433.03158.

IR (ATR,  $cm^{-1}$ ):  $\tilde{\nu}$  = 3029 (w), 1615 (m), 1484 (m), 1384 (w), 1347 (m), 1271 (s), 1233 (m), 1145 (m), 1025 (w), 948 (w), 860 (w), 812 (m), 752 (s), 702 (m), 627 (m), 586 (m), 546 (m).

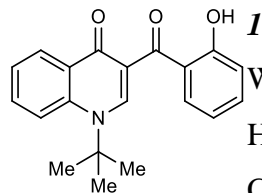

**1-(tert-butyl)-3-(2-hydroxybenzoyl)quinolin-4(1H)-one 4o.**

White solid (0.177 g, 55%), mp 230-231 °C.  $^1H$  NMR (300 MHz,  $DMSO-d_6$ ):  $\delta$  = 1.15 (s, 9H,  $t$ -Bu), 6.34 (d, 1H,  $^3J$  = 10.6 Hz,  $CH_{Ar}$ ), 7.01 (d, 1H,  $^3J$  = 8.3 Hz,  $CH_{Ar}$ ), 7.16 (t, 1H,  $^3J$  = 8.0 Hz,  $CH_{Ar}$ ), 7.51 (t, 1H,  $^3J$  = 7.0 Hz,  $CH_{Ar}$ ), 7.77-7.87 (m, 2H,  $CH_{Ar}$ ), 7.97 (t, 1H,  $^3J$  = 8.1 Hz,  $CH_{Ar}$ ), 8.06 (d, 1H,  $^3J$  = 7.7 Hz,  $CH_{Ar}$ ), 8.08 (d, 1H,  $^3J$  = 7.7 Hz,  $CH_{Ar}$ ), 16.09 (br. s, 1H, OH).

$^{13}C$  NMR (62.9 MHz,  $DMSO-d_6$ ):  $\delta$  = 30.1 ( $t$ -Bu), 49.6 ( $Ct$ -Bu), 80.1 (CH), 111.8, 115.8 (C), 118.4, 118.6, 120.9, 123.6, 125.0, 125.2, 133.3, 134.1 (CH), 154.4, 154.6, 155.1, 173.4 (C).

MS (GC, 70eV):  $m/z$  (%) = 321 ( $M^+$ , 30), 264 (64), 249 (100).



HRMS (EI): Calcd for C<sub>20</sub>H<sub>19</sub>NO<sub>3</sub> (M<sup>+</sup>) 321.13594. Found 321.136189.

IR (ATR, cm<sup>-1</sup>):  $\tilde{\nu}$  = 3303 (w), 2965 (w), 1638 (s), 1604 (m), 1561 (m), 1514 (w), 1465 (s), 1419 (s), 1360 (w), 1327 (w), 1311 (w), 1258 (m), 1205 (m), 1142 (m), 1099 (m), 1023 (w), 949 (w), 900 (w), 869 (m), 840 (m), 755 (s), 709 (s), 673 (m), 614 (m), 555 (m).

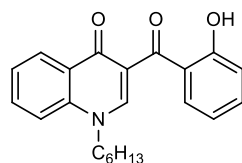

**1-hexyl-3-(2-hydroxybenzoyl)quinolin-4(1H)-one 4d'.**

Brown viscous oil (0.325 g, 93%). <sup>1</sup>H NMR (250 MHz, CDCl<sub>3</sub>):  $\delta$  = 0.84-0.90 (m, 3H, hexyl), 1.23-1.36 (m, 6H, hexyl), 1.86-1.90 (m, 2H, hexyl), 4.14-4.20 (m, 2H, hexyl), 6.78-6.84 (m, 1H, CH<sub>Ar</sub>), 6.94-6.97 (m, 1H, CH<sub>Ar</sub>), 7.40-7.50 (m, 3H, CH<sub>Ar</sub>), 7.66-7.73 (m, 2H, CH<sub>Ar</sub>), 8.00 (s, 1H, CH<sub>Ar</sub>), 8.50 (d, 1H, <sup>3</sup>J = 7.9 Hz, CH<sub>Ar</sub>), 12.05 (s, 1H, OH).

<sup>13</sup>C NMR (62.9 MHz, CDCl<sub>3</sub>):  $\delta$  = 13.8 (Me), 22.4, 26.3, 28.8, 31.2, 54.0 (CH<sub>2</sub>), 115.8, 117.7 (CH), 118.5 (C), 119.9, 120.6, 124.9 (CH), 127.8 (C), 128.6 (CH), 132.8 (C), 133.5, 136.2, 139.0, 146.2 (CH), 162.4, 174.2, 198.7 (C).

MS (GC, 70eV):  $m/z$  (%) = 349 (M<sup>+</sup>, 76), 350 (100).

HRMS (EI): Calcd for C<sub>22</sub>H<sub>23</sub>NO<sub>3</sub> (M<sup>+</sup>) 349.16779. Found 349.16793.

IR (ATR, cm<sup>-1</sup>):  $\tilde{\nu}$  = 2927 (w), 2856 (w), 1625 (s), 1596 (s), 1548 (m), 1484 (m), 1460 (m), 1418 (w), 1345 (m), 1269 (m), 1227 (m), 1150 (m), 1122 (w), 1033 (w), 979 (w), 907 (m), 866 (w), 755 (m), 724 (s), 643 (m), 595 (w), 563 (w).

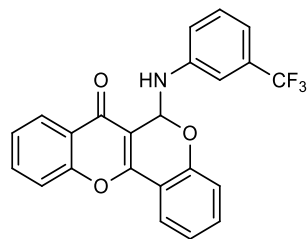

**6-((3-(trifluoromethyl)phenyl)amino)chromeno[4,3-b]chromen-7(6H)-one 5a.**

Yellow solid (0.303 g, 74%), mp 277-279 °C. <sup>1</sup>H NMR (300 MHz, DMSO-*d*<sub>6</sub>):  $\delta$  = 6.83 (d, 1H, <sup>3</sup>J = 7.7 Hz, CHNH), 7.04-7.07 (m, 2H, CHNH, CH<sub>Ar</sub>), 7.14-7.27 (m, 3H, CH<sub>Ar</sub>), 7.40-7.45 (m, 1H, CH<sub>Ar</sub>), 7.49-7.58 (m, 3H, CH<sub>Ar</sub>), 7.84-7.91 (m, 2H, CH<sub>Ar</sub>), 8.05-8.13 (m, 2H, CH<sub>Ar</sub>).

<sup>19</sup>F NMR (282 MHz, DMSO-*d*<sub>6</sub>):  $\delta$  = -61.3 (CF<sub>3</sub>).

<sup>13</sup>C NMR (75.5 MHz, DMSO-*d*<sub>6</sub>):  $\delta$  = 76.9 (CHNH), 109.4 (q, *J* = 4 Hz, CH), 110.0 (C), 114.5 (q, *J* = 4 Hz, CH), 115.4 (C), 117.0, 118.3, 122.1 (CH), 123.6 (C), 123.9 (CH), 124.3 (q, <sup>1</sup>*J* = 272 Hz, CF<sub>3</sub>), 125.0, 125.7 (CH), 129.9 (q, <sup>2</sup>*J* = 31 Hz, CCF<sub>3</sub>), 130.2, 133.9, 134.6 (CH), 145.9, 154.3, 155.1, 155.2, 173.5 (C).

MS (GC, 70eV):  $m/z$  (%) = 409 ( $M^+$ , 1), 249 (100).

HRMS (ESI): Calcd for  $C_{23}H_{14}NNaO_3F_3$  ( $M+Na$ ) 432.0818. Found 432.08149.

IR (ATR,  $cm^{-1}$ ):  $\tilde{\nu}$  = 3297 (w), 1634 (m), 1601 (m), 1563 (m), 1539 (m), 1489 (m), 1466 (m), 1425 (s), 1342 (s), 1312 (m), 1263 (m), 1214 (m), 1166 (m), 1136 (m), 1089 (s), 1068 (s), 1025 (m), 996 (w), 927 (m), 868 (m), 856 (m), 760 (s), 695 (s), 564 (m).

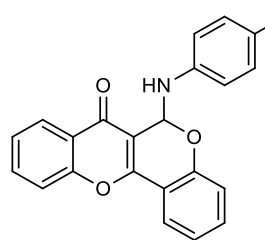

**6-((4-fluorophenyl)amino)chromeno[4,3-b]chromen-7(6H)-one 5b.**

Yellow solid (0.309 g, 84%), mp 274-276 °C.  $^1H$  NMR (300 MHz,  $DMSO-d_6$ ):  $\delta$  = 6.71 (d, 1H,  $^3J = 8.0$  Hz,  $CHNH$ ), 6.86-6.91 (m, 2H,  $CH_{Ar}$ ), 6.99-7.07 (m, 4H,  $CHNH$ ,  $CH_{Ar}$ ), 7.23 (t, 1H,  $^3J = 8.0$  Hz,  $CH_{Ar}$ ), 7.48-7.58 (m, 2H,  $CH_{Ar}$ ), 7.83-7.93 (m, 2H,  $CH_{Ar}$ ), 8.03-8.12 (m, 2H,  $CH_{Ar}$ ).

$^{19}F$  NMR (282 MHz,  $DMSO-d_6$ ):  $\delta$  = -126.5 (CF).

$^{13}C$  NMR (62.9 MHz,  $DMSO-d_6$ ):  $\delta$  = 77.8 ( $CHNH$ ), 110.3 (C), 114.4 (d,  $^3J = 8.0$  Hz, CH), 115.3 (CH), 115.5 (C), 115.6 (CH), 118.4 (d,  $^3J = 8.0$  Hz, CH), 121.7 (CH), 123.7 (C), 123.8, 125.0, 125.6, 133.8, 134.5 (CH), 140.1 (d,  $^2J = 50.8$  Hz, C), 141.9, 154.5, 155.2 (C), 155.6 (d,  $^1J = 232.8$  Hz, CF), 173.5 (C=O).

MS (GC, 70eV):  $m/z$  (%) = 359 ( $M^+$ , 1), 249 (100).

HRMS (ESI): Calcd for  $C_{22}H_{15}FNO_3$  ( $M+H$ ) 360.10305. Found 360.1038.

IR (ATR,  $cm^{-1}$ ):  $\tilde{\nu}$  = 3312 (m), 2958 (w), 1636 (s), 1603 (m), 1563 (w), 1530 (m), 1506 (s), 1464 (s), 1426 (s), 1347 (w), 1306 (m), 1253 (w), 1207 (m), 1149 (m), 1130 (m), 1088 (m), 1027 (w), 921 (s), 867 (m), 825 (s), 760 (s), 700 (m), 658 (m), 603 (m), 554 (m).

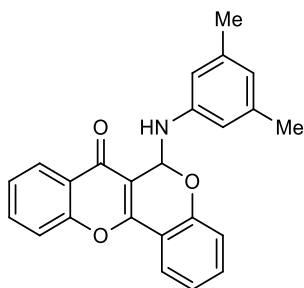

**6-((3,5-dimethylphenyl)amino)chromeno[4,3-b]chromen-7(6H)-one 5c.**

Yellow solid (0.203 g, 55%), mp 278-280 °C. <sup>1</sup>H NMR (300 MHz, DMSO-*d*<sub>6</sub>): δ = 2.19 (s, 6H, Me), 6.39 (s, 1H, CH<sub>Ar</sub>), 6.50 (s, 2H, CH<sub>Ar</sub>), 6.72 (d, 1H, <sup>3</sup>J = 7.7 Hz, CHNH), 6.91 (d, 1H, <sup>3</sup>J = 8.1 Hz, CH<sub>Ar</sub>), 7.04 (d, 1H, <sup>3</sup>J = 7.7 Hz, CHNH), 7.22 (t, 1H, <sup>3</sup>J = 7.7 Hz, CH<sub>Ar</sub>), 7.47-7.57 (m, 2H, CH<sub>Ar</sub>), 7.84-7.90 (m, 2H, CH<sub>Ar</sub>), 8.02-8.12 (m, 2H, CH<sub>Ar</sub>).

<sup>13</sup>C NMR data not obtained due to poor solubility.

MS (GC, 70eV): *m/z* (%) = 369 (M<sup>+</sup>, 10), 249 (100).

HRMS (ESI): Calcd for C<sub>24</sub>H<sub>20</sub>NO<sub>3</sub> (M+H) 370.14377. Found 370.14331.

IR (ATR, cm<sup>-1</sup>):  $\tilde{\nu}$  = 3311 (m), 1631 (s), 1601 (s), 1559 (m), 1464 (m), 1424 (s), 1356 (w), 1336 (m), 1309 (m), 1256 (m), 1215 (w), 1185 (m), 1139 (m), 1097 (m), 1025 (w), 994 (w), 917 (m), 866 (m), 851 (m), 820 (m), 756 (s), 690 (m), 624 (w), 535 (m).

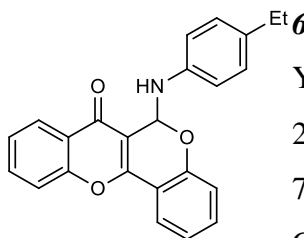

**6-((4-ethylphenyl)amino)chromeno[4,3-b]chromen-7(6H)-one 5d.**

Yellow solid (0.306 g, 83%), mp 248-249 °C. <sup>1</sup>H NMR (300 MHz, DMSO-*d*<sub>6</sub>): δ = 1.14 (t, 3H, <sup>3</sup>J = 7.6 Hz, Me), 2.44-2.54 (m, 2H, CH<sub>2</sub>), 6.70 (d, 1H, <sup>3</sup>J = 8.0 Hz, CHNH), 6.80 (d, 2H, <sup>3</sup>J = 8.4 Hz, CH<sub>Ar</sub>), 6.92 (m, 1H, <sup>3</sup>J = 7.8 Hz, CH<sub>Ar</sub>), 7.01 (d, 3H, <sup>3</sup>J = 8.4 Hz, CHNH, CH<sub>Ar</sub>), 7.22 (t, 1H, <sup>3</sup>J = 7.5 Hz, CH<sub>Ar</sub>), 7.47-7.56 (m, 2H, CH<sub>Ar</sub>), 7.82-7.91 (m, 2H, CH<sub>Ar</sub>), 8.02-8.11 (m, 2H, CH<sub>Ar</sub>).

<sup>13</sup>C NMR (62.9 MHz, DMSO-*d*<sub>6</sub>): δ = 16.0 (Me), 27.4 (CH<sub>2</sub>), 77.7 (CHNH), 110.3 (C), 113.4 (CH), 115.6 (C), 118.4, 118.5, 121.7 (CH), 123.7 (C), 123.8, 125.0, 125.5, 128.2 (CH), 133.5 (C), 133.7, 134.4 (CH), 143.1, 154.5, 154.9, 155.1, 173.5 (C).

MS (GC, 70eV): *m/z* (%) = 369 (M<sup>+</sup>, 2), 249 (100).

HRMS (ESI): Calcd for C<sub>24</sub>H<sub>20</sub>NO<sub>3</sub> (M+H) 370.14377. Found 370.14351.

IR (ATR, cm<sup>-1</sup>):  $\tilde{\nu}$  = 3318 (m), 2958 (w), 1626 (s), 1559 (m), 1520 (m), 1465 (m), 1428 (s), 1358 (w), 1300 (m), 1254 (m), 1186 (w), 1137 (m), 1097 (m), 947 (w), 920 (m), 866 (m), 823 (m), 759 (s), 700 (m), 601 (m), 534 (m).

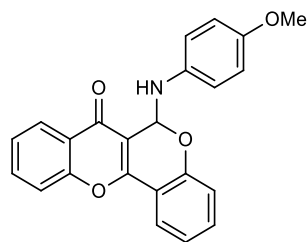

**6-((4-methoxyphenyl)amino)chromeno[4,3-b]chromen-7(6H)-one 5e.**

Yellow solid (0.211 g, 57%), mp 238-240 °C. <sup>1</sup>H NMR (300 MHz, DMSO-*d*<sub>6</sub>): δ = 3.68 (s, 3H, OMe), 6.66-6.83 (m, 5H, CHNH, CH<sub>Ar</sub>), 7.01-7.04 (m, 1H, CHNH), 7.20-7.24 (m, 2H, CH<sub>Ar</sub>), 7.50-7.54 (m, 2H, CH<sub>Ar</sub>), 7.86 (br. s, 2H, CH<sub>Ar</sub>), 8.02-8.11 (m, 2H, CH<sub>Ar</sub>).

<sup>13</sup>C NMR (62.9 MHz, DMSO-*d*<sub>6</sub>): δ = 55.2 (OMe), 78.3 (CHNH), 114.4, 114.5 (CH), 115.6 (C), 118.3, 118.4, 121.7 (CH), 123.7 (C), 123.8, 125.0, 125.5, 133.7, 134.4 (CH), 139.1, 152.3, 154.6, 154.8, 155.1, 173.5 (C).

MS (GC, 70eV): *m/z* (%) = 371 (M<sup>+</sup>, 3), 249 (100).

HRMS (ESI): Calcd for C<sub>23</sub>H<sub>18</sub>NO<sub>4</sub> (M+H) 372.12303. Found 372.12293.

IR (ATR, cm<sup>-1</sup>):  $\tilde{\nu}$  = 3328 (m), 1637 (s), 1601 (m), 1552 (w), 1509 (s), 1462 (m), 1424 (s), 1342 (w), 1292 (m), 1230 (s), 1209 (m), 1136 (m), 1097 (m), 1036 (m), 922 (m), 852 (m), 814 (s), 759 (s), 700 (s), 655 (m), 551 (m).

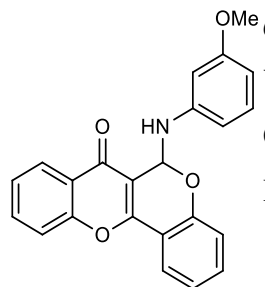

**6-((3-methoxyphenyl)amino)chromeno[4,3-b]chromen-7(6H)-one 5f.**

Yellow solid (0.226 g, 61%), mp 239-241 °C. <sup>1</sup>H NMR (300 MHz, DMSO-*d*<sub>6</sub>): δ = 3.70 (s, 3H, OMe), 6.31-6.35 (m, 1H, CH<sub>Ar</sub>), 6.43-6.50 (m, 2H, CH<sub>Ar</sub>), 6.72 (d, 1H, <sup>3</sup>J = 7.7 Hz, CHNH), 7.03-7.12 (m, 3H, CHNH, CH<sub>Ar</sub>), 7.23 (t, 1H, <sup>3</sup>J = 7.5 Hz, CH<sub>Ar</sub>), 7.48-7.58 (m, 2H, CH<sub>Ar</sub>), 7.83-7.93 (m, 2H, CH<sub>Ar</sub>), 8.03-8.13 (m, 2H, CH<sub>Ar</sub>).

<sup>13</sup>C NMR (62.9 MHz, DMSO-*d*<sub>6</sub>): δ = 54.7 (OMe), 77.4 (CHNH), 99.3, 103.9, 106.1 (CH), 110.2, 115.5 (C), 118.4, 118.5, 121.8 (CH), 123.9 (C), 123.9, 125.0, 125.6, 129.8, 133.7, 134.5 (CH), 146.6, 154.5, 155.0, 155.1, 160.2, 173.5 (C).

MS (GC, 70eV): *m/z* (%) = 371 (M<sup>+</sup>, 3), 249 (100).

HRMS (ESI): Calcd for C<sub>23</sub>H<sub>18</sub>NO<sub>4</sub> (M+H) 372.12303. Found 372.12329.

IR (ATR, cm<sup>-1</sup>):  $\tilde{\nu}$  = 3309 (m), 1632 (s), 1598 (s), 1559 (m), 1487 (m), 1464 (m), 1429 (s), 1359 (w), 1313 (m), 1255 (m), 1227 (w), 1203 (m), 1161 (m), 1099 (m), 1044 (m), 925 (m), 858 (m), 829 (m), 756 (s), 686 (s), 662 (m), 532 (m).

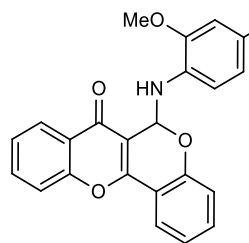

**6-((2,4-dimethoxyphenyl)amino)chromeno[4,3-b]chromen-7(6H)-one 5g.**

Black solid (0.120 g, 30%), mp 214-216 °C. <sup>1</sup>H NMR (300 MHz, DMSO-*d*<sub>6</sub>): δ = 3.62 (s, 3H, OMe), 3.71 (s, 3H, OMe), 5.93 (d, 1H, <sup>3</sup>J = 8.2 Hz, CH<sub>Ar</sub>), 6.49-6.52 (m, 2H, CH<sub>Ar</sub>), 6.69 (d, 1H, <sup>3</sup>J = 8.0 Hz, CHNH), 6.99 (d, 1H, <sup>3</sup>J = 8.0 Hz, CHNH), 7.15-7.23 (m, 2H, CH<sub>Ar</sub>), 7.46-7.55 (m, 2H, CH<sub>Ar</sub>), 7.81-7.87 (m, 2H, CH<sub>Ar</sub>), 8.00-8.11 (m, 2H, CH<sub>Ar</sub>).

<sup>13</sup>C NMR (62.9 MHz, DMSO-*d*<sub>6</sub>): δ = 55.2, 55.2 (OMe), 78.1 (CHNH), 99.2, 104.2 (CH), 110.1 (C), 112.2 (CH), 115.9

(C), 118.2, 121.7, 123.9, 125.3 (CH), 128.3, 133.5, 134.2, 147.5, 152.7, 154.4, 155.2, 173.8 (C).

MS (GC, 70eV): *m/z* (%) = 401 (M<sup>+</sup>, 4), 249 (100).

HRMS (ESI): Calcd for C<sub>24</sub>H<sub>20</sub>NO<sub>5</sub> (M+H) 402.1336. Found 402.13361.

IR (ATR, cm<sup>-1</sup>):  $\tilde{\nu}$  = 3352 (s), 1637 (s), 1606 (m), 1564 (w), 1524 (m), 1465 (m), 1425 (s), 1312 (w), 1259 (m), 1205 (s), 1144 (m), 1095 (m), 1033 (m), 921 (m), 830 (m), 754 (s), 698 (m), 617 (w).

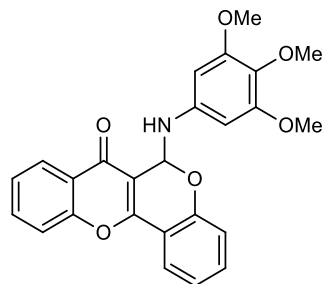

**6-((3,4,5-trimethoxyphenyl)amino)chromeno[4,3-b]chromen-7(6H)-one 5h.**

Yellow solid (0.302 g, 70%), mp 265-267 °C. <sup>1</sup>H NMR (300 MHz, DMSO-*d*<sub>6</sub>): δ = 3.57 (s, 3H, OMe), 3.74 (s, 6H, 2xOMe), 6.18 (s, 2H, CH<sub>Ar</sub>), 6.74 (d, 1H, <sup>3</sup>J = 7.4 Hz, CHNH), 6.95 (d, 1H, <sup>3</sup>J = 7.4 Hz, CH<sub>Ar</sub>), 7.08 (d, 1H, <sup>3</sup>J = 8.2 Hz, CHNH), 7.22 (t, 1H, <sup>3</sup>J = 7.4 Hz, CH<sub>Ar</sub>), 7.50-7.57 (m, 2H, CH<sub>Ar</sub>), 7.84-7.92 (m, 2H, CH<sub>Ar</sub>), 8.03-8.12 (m, 2H, CH<sub>Ar</sub>).

<sup>13</sup>C NMR data not obtained due to poor solubility.

MS (GC, 70eV): *m/z* (%) = 431 (M<sup>+</sup>, 3), 249 (100).

HRMS (ESI): Calcd for C<sub>25</sub>H<sub>22</sub>NO<sub>6</sub> (M+H) 432.14416. Found 432.14418.

IR (ATR, cm<sup>-1</sup>):  $\tilde{\nu}$  = 3322 (m), 2938 (w), 1638 (s), 1600 (s), 1563 (m), 1530 (m), 1509 (m), 1456 (s), 1422 (s), 1348 (w), 1310 (w), 1236 (s), 1196 (s), 1121 (s), 1101 (s), 1010 (m), 912 (m), 883 (m), 850 (m), 804 (m), 757 (s), 705 (m), 651 (m).

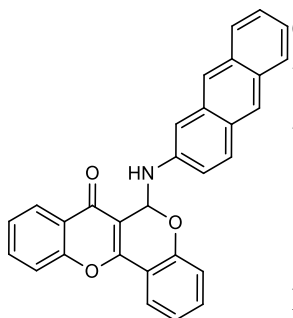

**6-(anthracen-2-ylamino)chromeno[4,3-b]chromen-7(6H)-one 5i.**

Yellow solid (0.238 g, 54%), mp 297-298 °C. <sup>1</sup>H NMR (300 MHz, DMSO-*d*<sub>6</sub>): δ = 6.99 (d, 1H, <sup>3</sup>*J* = 7.7 Hz, CHNH), 7.07-7.13 (m, 2H, CHNH, CH<sub>Ar</sub>), 7.25-7.30 (m, 1H, CH<sub>Ar</sub>), 7.37-7.61 (m, 6H, CH<sub>Ar</sub>), 7.91-8.02 (m, 5H, CH<sub>Ar</sub>), 8.10-8.16 (m, 2H, CH<sub>Ar</sub>), 8.38 (d, 2H, <sup>3</sup>*J* = 14.9 Hz, CH<sub>Ar</sub>).

<sup>13</sup>C NMR data not obtained due to poor solubility.

MS (GC, 70eV): *m/z* (%) = 441 (M<sup>+</sup>, 1), 249 (100), 193 (47), 165 (25).

HRMS (ESI): Calcd for C<sub>30</sub>H<sub>20</sub>NO<sub>3</sub> (M+H) 442.14377. Found 442.14405.

IR (ATR, cm<sup>-1</sup>):  $\tilde{\nu}$  = 3329 (m), 1623 (s), 1602 (m), 1548 (m), 1462 (m), 1422 (s), 1353 (m), 1323 (m), 1272 (w), 1229 (m), 1204 (m), 1183 (m), 1124 (m), 1092 (m), 998 (w), 946 (w), 913 (m), 867 (s), 812 (m), 776 (m), 760 (s), 741 (s), 686 (m), 609 (m), 584 (m), 566 (m), 538 (m).

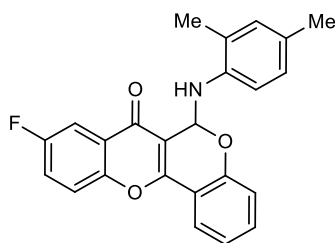

**6-((2,4-dimethylphenyl)amino)-9-fluorochromeno[4,3-b]chromen-7(6H)-one 5j.**

Yellow solid (0.143 g, 37%), mp 240-242 °C. <sup>1</sup>H NMR (300 MHz, DMSO-*d*<sub>6</sub>): δ = 1.89 (s, 3H, Me), 2.19 (s, 3H, Me), 6.00 (t, 1H, <sup>3</sup>*J* = 8.2 Hz, CH<sub>Ar</sub>), 6.67 (d, 1H, <sup>3</sup>*J* = 7.8 Hz, CHNH), 6.82 (br. s, 1H, CH<sub>Ar</sub>), 6.95-7.06 (m, 2H, CHNH, CH<sub>Ar</sub>), 7.17-7.24 (m, 2H, CH<sub>Ar</sub>), 7.47-7.56 (m, 1H, CH<sub>Ar</sub>), 7.75-8.05 (m, 4H, CH<sub>Ar</sub>).

<sup>19</sup>F NMR (282 MHz, DMSO-*d*<sub>6</sub>): δ = -115.5 (CF).

<sup>13</sup>C NMR data not obtained due to poor solubility.

MS (GC, 70eV): *m/z* (%) = 387 (M<sup>+</sup>, 3), 267 (100), 121 (19).

HRMS (ESI): Calcd for C<sub>24</sub>H<sub>19</sub>NFO<sub>3</sub> (M+H) 388.13435. Found 388.13504.

IR (ATR, cm<sup>-1</sup>):  $\tilde{\nu}$  = 3353 (w), 1633 (s), 1603 (s), 1565 (m), 1515 (m), 1478 (s), 1454 (s), 1410 (s), 1367 (m), 1318 (m), 1247 (m), 1212 (m), 1187 (m), 1134 (m), 1088 (m), 1010 (w), 954 (w), 918 (m), 861 (m), 823 (m), 807 (m), 774 (s), 757 (s), 744 (s), 700 (m), 659 (m).

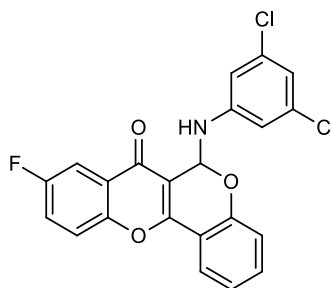

**6-((3,5-dichlorophenyl)amino)-9-fluorochromeno[4,3-b]chromen-7(6H)-one 5k.**

White solid (0.304 g, 71%), mp 285-286 °C. <sup>1</sup>H NMR (300 MHz, DMSO-*d*<sub>6</sub>): δ = 6.83 (d, 1H, <sup>3</sup>*J* = 7.6 Hz, CHNH),

6.90 (br. s, 3H, CH<sub>Ar</sub>), 7.10 (d, 1H, <sup>3</sup>*J* = 8.1 Hz, CHNH), 7.25 (t, 1H, <sup>3</sup>*J* = 7.2 Hz, CH<sub>Ar</sub>), 7.51-7.60 (m, 2H, CH<sub>Ar</sub>),

7.78-7.83 (m, 2H, CH<sub>Ar</sub>), 7.96-8.00 (m, 1H, CH<sub>Ar</sub>), 8.06 (m, 1H, CH<sub>Ar</sub>).

<sup>19</sup>F NMR (282 MHz, DMSO-*d*<sub>6</sub>): δ = -114.9 (CF).

<sup>13</sup>C NMR data not obtained due to poor solubility.

MS (GC, 70eV): *m/z* (%) = 427 (M<sup>+</sup>, 1), 267 (100).

HRMS (ESI): Calcd for C<sub>22</sub>H<sub>11</sub>NC<sub>2</sub>FO<sub>3</sub> (M+H) 426.01055. Found 426.01175.

IR (ATR, cm<sup>-1</sup>):  $\tilde{\nu}$  = 3290 (m), 1626 (m), 1580 (s), 1556 (s), 1479 (m), 1446 (m), 1409 (m), 1356 (m), 1272 (w), 1253 (m), 1209 (m), 1129 (m), 1105 (m), 1088 (m), 1014 (w), 989 (w), 961 (m), 923 (m), 872 (m), 824 (m), 773 (m), 763 (s), 746 (m), 668 (m), 611 (m).

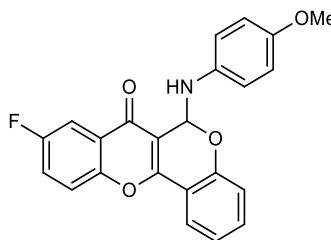

**9-fluoro-6-((4-methoxyphenyl)amino)chromeno[4,3-b]chromen-7(6H)-one 5l.**

Yellow solid (0.187 g, 48%), mp 249-251 °C. <sup>1</sup>H NMR (300 MHz, DMSO-*d*<sub>6</sub>): δ = 3.68 (s, 3H, OMe), 6.66 (d, 1H, <sup>3</sup>*J*

= 7.6 Hz, CHNH), 6.77-6.86 (m, 5H, CH<sub>Ar</sub>), 7.02 (d, 1H, <sup>3</sup>*J* = 8.2 Hz, CHNH), 7.22 (m, 1H, <sup>3</sup>*J* = 7.6 Hz, CH<sub>Ar</sub>), 7.51

(t, 1H, <sup>3</sup>*J* = 7.0 Hz, CH<sub>Ar</sub>), 7.76-7.90 (m, 2H, CH<sub>Ar</sub>), 7.95-8.09 (m, 2H, CH<sub>Ar</sub>).

<sup>19</sup>F NMR (282 MHz, DMSO-*d*<sub>6</sub>): δ = -115.2 (CF).

<sup>13</sup>C NMR (62.9 MHz, DMSO-*d*<sub>6</sub>): δ = 55.2 (OMe), 77.2 (CHNH), 109.7 (d, *J* = 24 Hz, CH), 109.8 (C), 114.5, 114.6 (CH), 115.4 (C), 118.4 (CH), 121.2 (d, *J* = 9 Hz, CH), 121.7 (CH), 122.4 (d, *J* = 25 Hz, CH), 123.8 (CH), 124.9 (d, *J* = 7 Hz, C), 133.8 (CH), 139.1, 151.6, 152.3, 154.6, 155.2 (C), 159.0 (d, *J* = 245 Hz, CF), 172.8 (C).

MS (GC, 70eV): *m/z* (%) = 389 (M<sup>+</sup>, 3), 267 (100).

HRMS (ESI): Calcd for C<sub>23</sub>H<sub>17</sub>FNO<sub>4</sub> (M+H) 390.11361. Found 390.11406.

IR (ATR,  $\text{cm}^{-1}$ ):  $\tilde{\nu}$  = 3310 (m), 1626 (s), 1614 (s), 1599 (s), 1581 (m), 1558 (s), 1510 (s), 1479 (s), 1462 (s), 1410 (s), 1347 (w), 1313 (w), 1273 (m), 1232 (s), 1208 (s), 1178 (m), 1135 (s), 1092 (m), 1026 (m), 955 (w), 880 (m), 818 (s), 774 (s), 761 (s), 747 (s), 650 (w), 583 (m), 555 (m).

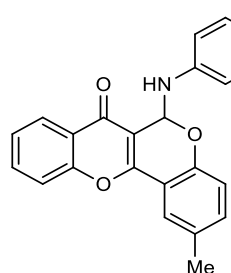

**6-((3,4-dimethoxyphenyl)amino)-2-methylchromeno[4,3-b]chromen-7(6H)-one 5m.**

Yellow solid (0.249 g, 60%), mp 258-260 °C.  $^1\text{H}$  NMR (300 MHz,  $\text{DMSO}-d_6$ ):  $\delta$  = 2.38 (s, 3H, Me), 3.67 (s, 3H, OMe), 3.69 (s, 3H, OMe), 6.44-6.46 (m, 2H,  $\text{CH}_{\text{Ar}}$ ), 6.64 (d, 1H,  $^3J = 7.8$  Hz,  $\text{CHNH}$ ), 6.74 (d, 1H,  $^3J = 7.8$  Hz,  $\text{CH}_{\text{Ar}}$ ), 6.81 (d, 1H,  $^3J = 7.8$  Hz,  $\text{CH}_{\text{Ar}}$ ), 6.94 (d, 1H,  $^3J = 7.8$  Hz,  $\text{CHNH}$ ), 7.29-7.33 (m, 1H,  $\text{CH}_{\text{Ar}}$ ), 7.51-7.56 (m, 1H,  $\text{CH}_{\text{Ar}}$ ), 7.83-7.7.91 (m, 3H,  $\text{CH}_{\text{Ar}}$ ), 8.09 (d, 1H,  $^3J = 7.4$  Hz,  $\text{CH}_{\text{Ar}}$ ).

$^{13}\text{C}$  NMR data not obtained due to poor solubility.

MS (GC, 70eV):  $m/z$  (%) = 415 ( $\text{M}^+$ , 3), 263 (100).

HRMS (ESI): Calcd for  $\text{C}_{25}\text{H}_{22}\text{NO}_5$  ( $\text{M}+\text{H}$ ) 416.14925. Found 416.14892.

IR (ATR,  $\text{cm}^{-1}$ ):  $\tilde{\nu}$  = 3312 (m), 1635 (s), 101 (m), 1515 (m), 1463 (s), 1429 (s), 1355 (w), 1318 (m), 1296 (w), 1257 (m), 1227 (s), 1202 (s), 1168 (m), 1134 (s), 1106 (s), 1028 (m), 928 (m), 910 (m), 859 (m), 828 (s), 786 (m), 757 (s), 702 (m), 670 (m).

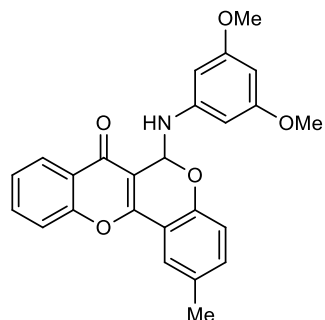

**6-((3,5-dimethoxyphenyl)amino)-2-methylchromeno[4,3-b]chromen-7(6H)-one 5n.**

Yellow solid (0.203 g, 49%), mp 268-270 °C.  $^1\text{H}$  NMR (300 MHz,  $\text{DMSO}-d_6$ ):  $\delta$  = 2.38 (s, 3H, Me), 3.68 (s, 6H, 2xOMe), 5.92 (t, 1H,  $^4J = 2.0$  Hz,  $\text{CH}_{\text{Ar}}$ ), 6.04 (d, 2H,  $^4J = 2.0$  Hz,  $\text{CH}_{\text{Ar}}$ ), 6.67 (d, 1H,  $^3J = 7.7$  Hz,  $\text{CHNH}$ ), 6.96 (d, 1H,  $^3J = 8.3$  Hz,  $\text{CH}_{\text{Ar}}$ ), 7.02 (d, 1H,  $^3J = 7.7$  Hz,  $\text{CHNH}$ ), 7.30-7.34 (m, 1H,  $\text{CH}_{\text{Ar}}$ ), 7.51-7.57 (m, 1H,  $\text{CH}_{\text{Ar}}$ ), 7.83-7.7.93 (m, 3H,  $\text{CH}_{\text{Ar}}$ ), 8.10 (d, 1H,  $^3J = 8.1$  Hz,  $\text{CH}_{\text{Ar}}$ ).

$^{13}\text{C}$  NMR (62.9 MHz,  $\text{DMSO}-d_6$ ):  $\delta$  = 20.2 (Me), 54.8 (OMe), 77.1, 90.8, 92.2 (CH), 110.3, 115.3 (C), 118.2, 118.4, 123.5 (CH), 123.7 (C), 125.0, 125.6 (CH), 130.9 (C), 134.5 (CH), 147.2, 152.4, 155.2, 161.1, 173.5 (C).

MS (GC, 70eV):  $m/z$  (%) = 415 ( $\text{M}^+$ , 3), 263 (100).

HRMS (ESI): Calcd for  $\text{C}_{25}\text{H}_{22}\text{NO}_5$  ( $\text{M}+\text{H}$ ) 416.14925. Found 416.14974.



IR (ATR,  $\text{cm}^{-1}$ ):  $\tilde{\nu}$  = 3317 (m), 1634 (m), 1596 (s), 1564 (s), 1540 (m), 1465 (s), 1429 (s), 1343 (w), 1296 (w), 1224 (w), 1195 (s), 1175 (m), 1144 (s), 1109 (s), 1059 (m), 1001 (m), 928 (m), 910 (m), 860 (s), 812 (s), 786 (m), 758 (s), 705 (m), 677 (s), 621 (m), 560 (m).

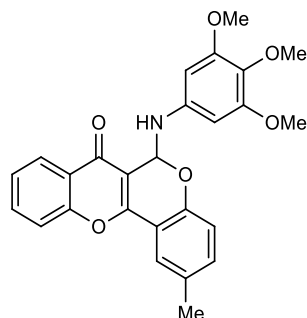

**2-methyl-6-((3,4,5-trimethoxyphenyl)amino)chromeno[4,3-b]chromen-7(6H)-one 5o.**

Yellow solid (0.174 g, 39%), mp 271-272 °C.  $^1\text{H}$  NMR (300 MHz,  $\text{DMSO}-d_6$ ):  $\delta$  = 2.38 (s, 3H, Me), 3.57 (s, 3H, OMe), 3.73 (s, 6H, 2xOMe), 6.17 (s, 2H,  $\text{CH}_{\text{Ar}}$ ), 6.69 (d, 1H,  $^3J$  = 7.6 Hz,  $\text{CH}_{\text{Ar}}$ ), 6.89 (d, 1H,  $^3J$  = 7.6 Hz,  $\text{CHNH}$ ), 6.97 (d, 1H,  $^3J$  = 7.8 Hz,  $\text{CHNH}$ ), 7.31-7.33 (m, 1H,  $\text{CH}_{\text{Ar}}$ ), 7.52-7.57 (m, 1H,  $\text{CH}_{\text{Ar}}$ ), 7.84-7.7.91 (m, 3H,  $\text{CH}_{\text{Ar}}$ ), 8.09 (d, 1H,  $^3J$  = 7.6 Hz,  $\text{CH}_{\text{Ar}}$ ).

$^{13}\text{C}$  NMR data not obtained due to poor solubility.

MS (GC, 70eV):  $m/z$  (%) = 445 ( $\text{M}^+$ , 21), 263 (100), 168 (19).

HRMS (ESI): Calcd for  $\text{C}_{26}\text{H}_{24}\text{NO}_6$  ( $\text{M}+\text{H}$ ) 446.15981. Found 446.16022.

IR (ATR,  $\text{cm}^{-1}$ ):  $\tilde{\nu}$  = 3323 (m), 1636 (m), 1602 (m), 1566 (m), 1510 (m), 1465 (m), 1429 (s), 1341 (w), 1239 (m), 1192 (m), 1129 (s), 1110 (s), 1013 (m), 909 (m), 856 (m), 807 (m), 776 (m), 760 (s), 706 (m), 665 (m), 630 (m), 605 (m), 545 (m).

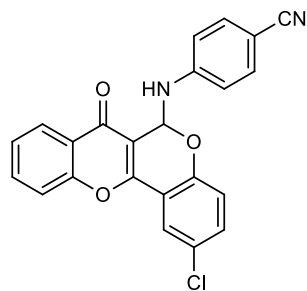

**4-((2-chloro-7-oxo-6,7-dihydrochromeno[4,3-b]chromen-6-yl)amino)benzotrile 5p.**

Yellow solid (0.196 g, 49%), mp 288-289 °C.  $^1\text{H}$  NMR (300 MHz,  $\text{DMSO}-d_6$ ):  $\delta$  = 6.90 (d, 1H,  $^3J$  = 8.2 Hz,  $\text{CHNH}$ ), 7.01 (d, 2H,  $^3J$  = 8.6 Hz,  $\text{CHNH}$ ), 7.10 (d, 1H,  $^3J$  = 8.6 Hz,  $\text{CH}_{\text{Ar}}$ ), 7.53-7.64 (m, 4H,  $\text{CH}_{\text{Ar}}$ ), 7.85-7.94 (m, 3H,  $\text{CH}_{\text{Ar}}$ ), 8.09-8.12 (m, 2H,  $\text{CH}_{\text{Ar}}$ ).

$^{13}\text{C}$  NMR data not obtained due to poor solubility.

MS (GC, 70eV):  $m/z$  (%) = 398 ( $\text{M}^+$ , 4), 402 (100), 400 (26).

HRMS (ESI): Calcd for  $\text{C}_{23}\text{H}_{13}\text{ClN}_2\text{O}_3$  ( $\text{M}-\text{H}$ ) 399.05488. Found 399.05419.

IR (ATR,  $\text{cm}^{-1}$ ):  $\tilde{\nu}$  = 3279 (w), 2919 (w), 2220 (m), 1603 (m), 1531 (m), 1463 (m), 1428 (s), 1318 (m), 1255 (m), 1212 (m), 1170 (m), 1089 (m), 1011 (m), 943 (m), 866 (m), 815 (s), 762 (s), 644 (m).

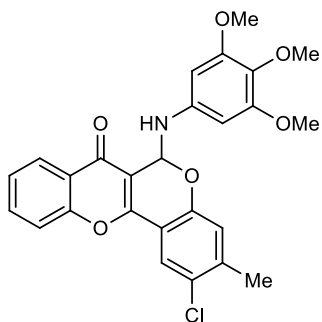

**2-chloro-3-methyl-6-((3,4,5-trimethoxyphenyl)amino)chromeno[4,3-b]chromen-7(6H)-one 5q.**

Yellow solid (0.187 g, 39%), mp 289-291 °C.  $^1\text{H NMR}$  (300 MHz,  $\text{DMSO-}d_6$ ):  $\delta$  = 2.35 (s, 3H, Me), 3.57 (s, 3H, OMe), 3.74 (s, 6H, 2xOMe), 6.17 (s, 2H,  $\text{CH}_{\text{Ar}}$ ), 6.77 (br. s, 1H,  $\text{CHNH}$ ), 6.96 (br. s, 1H,  $\text{CH}_{\text{Ar}}$ ), 7.14 (br. s, 1H,  $\text{CHNH}$ ), 7.55 (br. s, 1H,  $\text{CH}_{\text{Ar}}$ ), 7.90-8.09 (m, 4H,  $\text{CH}_{\text{Ar}}$ ).

$^{13}\text{C NMR}$  data not obtained due to poor solubility.

MS (GC, 70eV):  $m/z$  (%) = 479 ( $\text{M}^+$ , 4), 297 (100).

HRMS (ESI): Calcd for  $\text{C}_{26}\text{H}_{22}\text{NClO}_6$  ( $\text{M}+\text{H}$ ) 480.12084. Found 480.12112.

IR (ATR,  $\text{cm}^{-1}$ ):  $\tilde{\nu}$  = 3317 (w), 1637 (m), 1605 (s), 1533 (m), 1510 (m), 1461 (m), 1424 (s), 1341 (w), 1288 (w), 1247 (m), 1209 (m), 1124 (s), 998 (m), 914 (m), 847 (m), 802 (m), 762 (s), 679 (m), 565 (m).

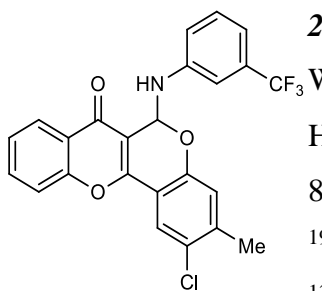

**2-chloro-3-methyl-6-((3-(trifluoromethyl)phenyl)amino)chromeno[4,3-b]chromen-7(6H)-one 5r.**

White solid (0.297 g, 65%), mp 297-299 °C.  $^1\text{H NMR}$  (300 MHz,  $\text{DMSO-}d_6$ ):  $\delta$  = 2.33 (s, 3H, Me), 6.83 (d, 1H,  $^3J = 7.9$  Hz,  $\text{CHNH}$ ), 7.05-7.21 (m, 4H,  $\text{CHNH}$ ,  $\text{CH}_{\text{Ar}}$ ), 7.39-7.58 (m, 3H,  $\text{CH}_{\text{Ar}}$ ), 7.90-7.93 (m, 2H,  $\text{CH}_{\text{Ar}}$ ), 8.04 (s, 1H,  $\text{CH}_{\text{Ar}}$ ), 8.10 (m, 1H,  $\text{CH}_{\text{Ar}}$ ).

$^{19}\text{F NMR}$  (282 MHz,  $\text{DMSO-}d_6$ ):  $\delta$  = -61.2 ( $\text{CF}_3$ ).

$^{13}\text{C NMR}$  data not obtained due to poor solubility.

MS (GC, 70eV):  $m/z$  (%) = 457 ( $\text{M}^+$ , 1), 297 (100), 161 (26).

HRMS (ESI): Calcd for  $\text{C}_{24}\text{H}_{15}\text{NClF}_3\text{NaO}_3$  ( $\text{M}+\text{Na}$ ) 480.05848. Found 480.05841.

IR (ATR,  $\text{cm}^{-1}$ ):  $\tilde{\nu}$  = 3307 (w), 1614 (m), 1573 (w), 1540 (m), 1477 (m), 1427 (m), 1337 (s), 1294 (w), 1270 (w), 1246 (w), 1165 (m), 1111 (s), 1068 (s), 1005 (w), 974 (w), 921 (m), 893 (s), 876 (m), 856 (m), 838 (m), 783 (m), 764 (s), 695 (m), 675 (m), 554 (m).

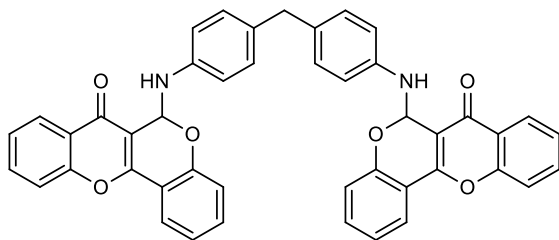

**6,6'-((methylenebis(4,1-phenylene))bis(azanediyl))bis(chromeno[4,3-b]chromen-7(6H)-one) 5s.**

Yellow solid (0.555 g, 80%), mp more than 375 °C. <sup>1</sup>H NMR (300 MHz, DMSO-*d*<sub>6</sub>): δ = 3.76 (s, 2H, CH<sub>2</sub>), 6.75 (d, 2H, <sup>3</sup>J = 8.0 Hz, CH<sub>Ar</sub>), 6.85 (d, 4H, <sup>3</sup>J = 8.3 Hz, CH<sub>Ar</sub>), 7.00-7.09 (m, 8H, CH<sub>Ar</sub>), 7.23-7.28 (m, 2H, CH<sub>Ar</sub>), 7.51-7.61 (m, 4H, CH<sub>Ar</sub>), 7.87-7.93 (m, 4H, CH<sub>Ar</sub>), 8.06-8.10 (m, 2H, CH<sub>Ar</sub>), 8.13-8.16 (m, 2H, CH<sub>Ar</sub>).

<sup>13</sup>C NMR data not obtained due to poor solubility.

MS (GC, 70eV): *m/z* (%) = 694 (M<sup>+</sup>, 21), 263 (100).

HRMS (ESI): Calcd for C<sub>45</sub>H<sub>30</sub>N<sub>2</sub>O<sub>6</sub> (M+H) 695.21766. Found 695.21771.

IR (ATR, cm<sup>-1</sup>):  $\tilde{\nu}$  = 3305 (m), 1626 (s), 1559 (s), 1517 (m), 1466 (m), 1427 (s), 1297 (m), 1249 (m), 1212 (m), 1137 (m), 1095 (m), 915 (m), 849 (m), 812 (m), 754 (s), 701 (m), 663 (m), 599 (m), 558 (m).

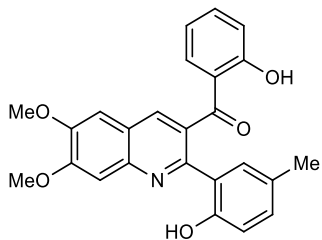

**(2-(2-hydroxy-5-methylphenyl)-6,7-dimethoxyquinolin-3-yl)(2-hydroxyphenyl)methanone 6a.**

Yellow solid (0.042 g, 10%), mp 173-174 °C. <sup>1</sup>H NMR (300 MHz, CDCl<sub>3</sub>): δ = 2.08 (s, 3H, Me), 4.04 (s, 3H, OMe), 4.10 (s, 3H, OMe), 6.62-6.69 (m, 1H, CH<sub>Ar</sub>), 6.92 (d, 1H, <sup>3</sup>J = 8.4 Hz, CH<sub>Ar</sub>), 7.00-7.05 (m, 2H, CH<sub>Ar</sub>), 7.11 (s, 1H, CH<sub>Ar</sub>), 7.14-7.24 (m, 3H, CH<sub>Ar</sub>), 7.42 (s, 1H, CH<sub>Ar</sub>), 8.15 (s, 1H, Py), 11.84 (s, 1H, OH), 12.72 (br. s, 1H, OH).

<sup>13</sup>C NMR (62.9 MHz, CDCl<sub>3</sub>): δ = 20.2 (Me), 56.3, 56.5 (OMe), 105.3, 106.5, 117.9, 118.2, 119.0 (CH), 119.1, 120.1,

121.1, 128.4, 129.4 (C), 130.1, 131.2, 132.4, 136.9, 138.1 (CH), 142.9, 150.9, 153.7, 154.6, 158.2, 161.3, 201.8 (C).

MS (GC, 70eV): *m/z* (%) = 415 (M<sup>+</sup>, 3), 263 (100).

HRMS (ESI): Calcd for C<sub>25</sub>H<sub>22</sub>NO<sub>5</sub> (M+H) 416.14925. Found 416.14892.

IR (ATR, cm<sup>-1</sup>):  $\tilde{\nu}$  = 3305 (s), 1619 (w), 1580 (w), 1499 (m), 1474 (m), 1372 (w), 1282 (w), 1243 (m), 1195 (m), 1155 (m), 1009 (m), 953 (w), 910 (w), 886 (w), 851 (m), 827 (m), 777 (m), 757 (m), 711 (m), 689 (m), 656 (m).

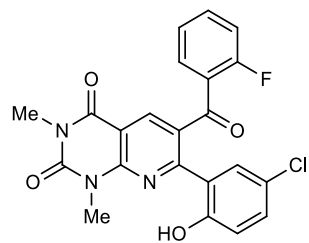

**7-(5-chloro-2-hydroxyphenyl)-6-(2-fluorobenzoyl)-1,3-dimethylpyrido[2,3-d]pyrimidine-2,4(1H,3H)-dione 6b.**

Yellow viscous oil (0.290 g, 66%).  $^1\text{H}$  NMR (300 MHz, DMSO- $d_6$ ):  $\delta$  = 3.47 (s, 3H, Me), 3.75 (s, 3H, Me), 6.88-6.96 (m, 2H, CH<sub>Ar</sub>), 7.18-7.28 (m, 2H, CH<sub>Ar</sub>), 7.31-7.37 (m, 2H, CH<sub>Ar</sub>), 7.58-7.64 (m, 1H, CH<sub>Ar</sub>), 8.53 (s, 1H, Py), 11.34 (s, 1H, OH).

$^{19}\text{F}$  NMR (282 MHz, DMSO- $d_6$ ):  $\delta$  = -114.5 (CF).

$^{13}\text{C}$  NMR data not obtained due to poor solubility.

MS (GC, 70eV):  $m/z$  (%) = 439 (M<sup>+</sup>, 27), 419 (19), 285 (100), 257 (16), 154 (21).

HRMS (ESI): Calcd for C<sub>22</sub>H<sub>14</sub>N<sub>3</sub>O<sub>4</sub>FCl (M+H) 440.10077. Found 440.08074.

IR (ATR, cm<sup>-1</sup>):  $\tilde{\nu}$  = 1716 (w), 1657 (m), 1631 (m), 1596 (s), 1568 (m), 1464 (m), 1413 (m), 1368 (m), 1344 (m), 1285 (m), 1199 (m), 1110 (m), 1019 (w), 938 (w), 913 (w), 830 (m), 806 (w), 750 (m), 685 (m), 645 (m), 600 (w).

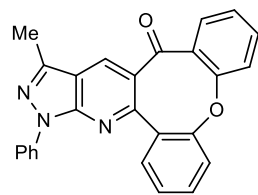

**13-methyl-11-phenyldibenzo[2,3:7,8]oxocino[4,5-b]pyrazolo[4,3-e]pyridin-15(11H)-one 7a.**

Yellow solid (0.214 g, 53%), mp 250-251 °C.  $^1\text{H}$  NMR (250 MHz, CDCl<sub>3</sub>):  $\delta$  = 2.40 (s, 3H, Me), 6.07-7.10 (m, 1H, CH<sub>Ar</sub>), 7.17-7.45 (m, 7H, CH<sub>Ar</sub>), 7.51-7.57 (m, 1H, CH<sub>Ar</sub>), 7.66 (dd, 1H,  $^3J$  = 7.4 Hz,  $^3J$  = 1.7 Hz, CH<sub>Ar</sub>), 7.98-8.01 (m, 2H, CH<sub>Ar</sub>), 8.28-8.31 (m, 2H, CH<sub>Ar</sub>).

$^{13}\text{C}$  NMR (62.9 MHz, CDCl<sub>3</sub>):  $\delta$  = 12.5 (Me), 115.7 (C), 120.6, 121.7, 122.4, 125.0, 125.6, 126.1, 129.0, 130.1, 130.6, 130.8, 130.9, 131.6 (CH), 132.8, 133.7 (C), 135.2 (CH), 139.4, 143.3, 150.7, 151.1, 127.5, 161.1, 194.9 (C).

MS (GC, 70eV):  $m/z$  (%) = 403 (M<sup>+</sup>, 100).

HRMS (ESI): Calcd for C<sub>26</sub>H<sub>18</sub>N<sub>3</sub>O<sub>2</sub> (M+H) 404.13935. Found 404.1389.

IR (ATR, cm<sup>-1</sup>):  $\tilde{\nu}$  = 3064 (s), 1645 (w), 1594 (s), 1495 (m), 1446 (m), 1382 (m), 1340 (w), 1308 (m), 1280 (s), 1210 (m), 1120 (m), 1102 (m), 1080 (m), 998 (w), 908 (w), 781 (m), 754 (s), 711 (m), 689 (s), 661 (m), 626 (m), 607 (m).

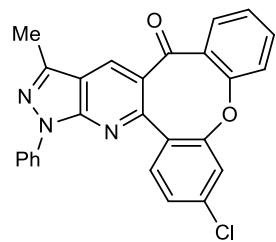

**7-chloro-13-methyl-11-phenyldibenzo[2,3:7,8]oxocino[4,5-b]pyrazolo[4,3-e]pyridin-15(11H)-one 7b.**

Yellow viscous oil (0.175 g, 40%). <sup>1</sup>H NMR (250 MHz, CDCl<sub>3</sub>): δ = 2.58 (s, 3H, Me), 7.03 (d, 1H, <sup>3</sup>J = 8.6 Hz, CH<sub>Ar</sub>), 7.18-7.36 (m, 4H, CH<sub>Ar</sub>), 7.41-7.63 (m, 4H, CH<sub>Ar</sub>), 7.99-8.02 (m, 2H, Py, CH<sub>Ar</sub>), 8.24-8.28 (m, 2H, CH<sub>Ar</sub>).

<sup>13</sup>C NMR (62.9 MHz, CDCl<sub>3</sub>): δ = 12.5 (Me), 116.0 (C), 120.8, 122.3, 123.3, 125.3, 125.9, 129.1, 130.3, 130.4 (CH), 130.7 (C), 131.0 (CH), 131.5 (C), 131.8 (CH), 132.7, 135.1 (C), 135.4 (CH), 139.3, 143.4, 149.7, 150.6, 156.0, 160.8, 194.5 (C).

MS (GC, 70eV): *m/z* (%) = 437 (M<sup>+</sup>, 100).

HRMS (ESI): Calcd for C<sub>26</sub>H<sub>16</sub>N<sub>3</sub>O<sub>2</sub>Cl (M<sup>+</sup>) 437.09256. Found 437.09255.

IR (ATR, cm<sup>-1</sup>):  $\tilde{\nu}$  = 3068 (w), 1632 (m), 1596 (m), 1507 (m), 1468 (m), 1413 (m), 1377 (m), 1340 (w), 1303 (m), 1278 (m), 1243 (m), 1210 (m), 1158 (m), 1120 (m), 1088 (m), 1000 (w), 945 (m), 876 (m), 812 (m), 768 (s), 711 (m), 683 (m), 626 (m).

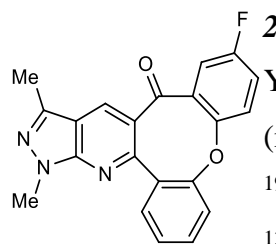

**2-fluoro-11,13-dimethyldibenzo[2,3:7,8]oxocino[4,5-b]pyrazolo[4,3-e]pyridin-15(11H)-one 7c.**

Yellow solid (0.215 g, 60%), mp 223-225 °C. <sup>1</sup>H NMR (250 MHz, CDCl<sub>3</sub>): δ = 2.51 (s, 3H, Me), 4.08 (s, 3H, Me), 7.07-7.10 (m, 1H, CH<sub>Ar</sub>), 7.19-7.38 (m, 4H, CH<sub>Ar</sub>), 7.61-7.70 (m, 2H, CH<sub>Ar</sub>), 7.97 (s, 1H, Py).

<sup>19</sup>F NMR (282 MHz, CDCl<sub>3</sub>): δ = -116.8 (CF).

<sup>13</sup>C NMR (62.9 MHz, CDCl<sub>3</sub>): δ = 12.4, 33.7 (Me), 113.6 (C), 117.6 (d, *J* = 25.6 Hz, CH), 121.5 (CH), 121.6 (d, *J* = 23.9 Hz, CH), 123.9 (d, *J* = 7.8 Hz, CH), 126.4, 130.6, 130.9 (CH), 132.0 (d, *J* = 6.6 Hz, C), 133.6, 141.4 (C), 151.0 (d, *J* = 27.6 Hz, C), 157.2 (d, *J* = 2.5 Hz, C), 157.6 (C), 159.2 (d, *J* = 245.3 Hz, CF), 193.7 (C).

MS (GC, 70eV): *m/z* (%) = 359 (M<sup>+</sup>, 100).

HRMS (ESI): Calcd for C<sub>21</sub>H<sub>14</sub>N<sub>3</sub>O<sub>2</sub>F (M+H) 360.11453. Found 360.11428.

IR (ATR, cm<sup>-1</sup>):  $\tilde{\nu}$  = 3070 (w), 1654 (m), 1597 (m), 1554 (w), 1480 (m), 1450 (m), 1412 (m), 1330 (w), 1259 (m), 1213 (m), 1181 (s), 1121 (m), 1016 (m), 914 (m), 891 (m), 848 (m), 835 (m), 781 (m), 765 (s), 744 (m), 708 (m), 637 (m), 594 (m).

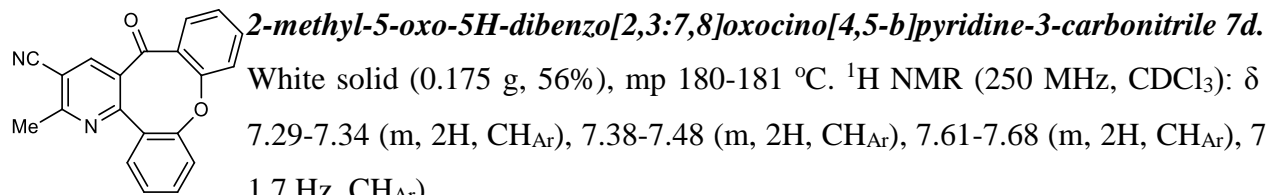

White solid (0.175 g, 56%), mp 180-181 °C. <sup>1</sup>H NMR (250 MHz, CDCl<sub>3</sub>): δ = 2.89 (s, 3H, Me), 7.15-7.18 (m, 1H, CH<sub>Ar</sub>), 7.29-7.34 (m, 2H, CH<sub>Ar</sub>), 7.38-7.48 (m, 2H, CH<sub>Ar</sub>), 7.61-7.68 (m, 2H, CH<sub>Ar</sub>), 7.90 (s, 1H, Py), 8.03 (dd, 1H, <sup>3</sup>J = 7.8 Hz, <sup>4</sup>J = 1.7 Hz, CH<sub>Ar</sub>).

<sup>13</sup>C NMR (62.9 MHz, CDCl<sub>3</sub>): δ = 23.8 (Me), 108.3, 116.3 (C), 121.9, 122.8, 125.4, 126.5 (CH), 129.9 (C), 130.1, 131.8, 131.9 (CH), 132.3, 135.7 (C), 136.2, 140.5 (CH), 153.4, 157.1, 161.2, 162.7, 192.1 (C).

MS (GC, 70eV): *m/z* (%) = 312 (M<sup>+</sup>, 100), 283 (60), 271 (27), 258 (43).

HRMS (EI): Calcd for C<sub>20</sub>H<sub>12</sub>N<sub>2</sub>O<sub>2</sub> (M<sup>+</sup>) 312.08933. Found 312.08883.

IR (ATR, cm<sup>-1</sup>):  $\tilde{\nu}$  = 2229 (w), 1636 (m), 1582 (m), 1537 (w), 1474 (m), 1452 (m), 1429 (m), 1310 (m), 1281 (m), 1222 (s), 1160 (m), 1099 (m), 992 (w), 931 (w), 887 (m), 854 (m), 770 (s), 746 (s), 706 (s), 674 (m), 658 (m).

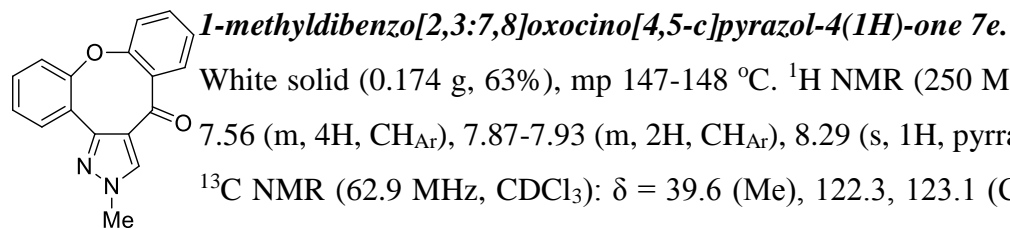

White solid (0.174 g, 63%), mp 147-148 °C. <sup>1</sup>H NMR (250 MHz, CDCl<sub>3</sub>): δ = 4.00 (s, 3H, Me), 7.23-7.29 (m, 2H, CH<sub>Ar</sub>), 7.38-7.56 (m, 4H, CH<sub>Ar</sub>), 7.87-7.93 (m, 2H, CH<sub>Ar</sub>), 8.29 (s, 1H, pyrazole).

<sup>13</sup>C NMR (62.9 MHz, CDCl<sub>3</sub>): δ = 39.6 (Me), 122.3, 123.1 (CH), 123.9 (C), 125.7, 126.0 (CH), 127.0 (C), 129.5, 130.6, 131.6 (CH), 132.1 (C), 134.2, 137.7 (CH), 145.7, 157.5, 159.0, 185.4 (C).

MS (GC, 70eV): *m/z* (%) = 276 (M<sup>+</sup>, 100), 248 (24).

HRMS (EI): Calcd for C<sub>17</sub>H<sub>12</sub>N<sub>2</sub>O<sub>2</sub> (M<sup>+</sup>) 276.08933. Found 276.08903.

IR (ATR, cm<sup>-1</sup>):  $\tilde{\nu}$  = 3132 (w), 1619 (m), 1593 (m), 1519 (m), 1456 (m), 1311 (m), 1256 (m), 1202 (m), 1186 (s), 1107 (m), 1007 (w), 918 (s), 859 (m), 816 (m), 777 (m), 748 (m), 716 (s), 665 (m).

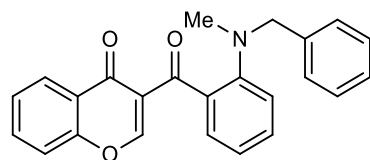

**3-(2-(benzyl(methyl)amino)benzoyl)-4H-chromen-4-one 8a.**

White solid (0.336 g, 91%), mp 149-150 °C. <sup>1</sup>H NMR (300 MHz, CDCl<sub>3</sub>): δ = 2.28 (s, 3H, Me), 3.90 (q, 2H, <sup>3</sup>J = 9.7 Hz, CH<sub>2</sub>), 6.48 (s, 1H, chromone), 7.04-7.11 (m, 2H, CH<sub>Ar</sub>), 7.15-7.33 (m, 5H, CH<sub>Ar</sub>), 7.38-7.49 (m, 2H, CH<sub>Ar</sub>), 7.53-7.56 (m, 1H, CH<sub>Ar</sub>), 7.65-7.72 (m, 1H, CH<sub>Ar</sub>), 7.89 (dd, 1H, <sup>3</sup>J = 8.2 Hz, <sup>4</sup>J = 1.8 Hz, CH<sub>Ar</sub>), 8.27 (dd, 1H, <sup>3</sup>J = 8.0 Hz, <sup>4</sup>J = 1.5 Hz, CH<sub>Ar</sub>).

<sup>13</sup>C NMR (75.5 MHz, CDCl<sub>3</sub>): δ = 35.5 (Me), 56.6 (CH<sub>2</sub>), 88.4, 109.2, 114.8 (C), 116.36, 117.9, 120.8, 123.6 (CH), 124.4 (C), 125.1, 126.0, 127.0, 128.2, 128.6, 133.6, 133.9 (CH), 155.5, 156.5, 157.7, 175.1 (C).

MS (GC, 70eV): *m/z* (%) = 369 (M<sup>+</sup>, 1), 249 (100), 120 (27).

HRMS (ESI): Calcd for C<sub>24</sub>H<sub>20</sub>NO<sub>3</sub> (M+H) 370.14377. Found 370.14384.

IR (ATR, cm<sup>-1</sup>):  $\tilde{\nu}$  = 2997 (w), 1640 (m), 1601 (m), 1563 (m), 1485 (w), 1463 (m), 1416 (s), 1350 (m), 1330 (m), 1258 (m), 1209 (m), 1164 (m), 1148 (m), 1107 (w), 1047 (s), 994 (w), 964 (m), 906 (m), 882 (m), 840 (m), 790 (w), 758 (s), 744 (s), 698 (s), 663 (m), 638 (m).

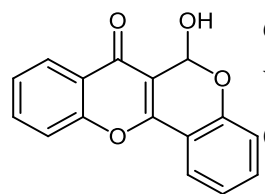

**6-hydroxychromeno[4,3-b]chromen-7(6H)-one 9a.**

White solid (0.021 g, 8%), mp 240-241 °C. <sup>1</sup>H NMR (300 MHz, DMSO-*d*<sub>6</sub>): δ = 6.55 (s, 1H, CHOH), 7.16-7.27 (m, 2H, CH<sub>Ar</sub>), 7.50-7.61 (m, 2H, CH<sub>Ar</sub>), 7.64 (br. s, 1H, CHOH), 7.79-7.90 (m, 2H, CH<sub>Ar</sub>), 8.01-8.04 (m, 1H, CH<sub>Ar</sub>), 8.09-8.12 (m, 1H, CH<sub>Ar</sub>).

<sup>13</sup>C NMR (62.9 MHz, DMSO-*d*<sub>6</sub>): δ = 87.3 (CHOH), 111.5, 114.6 (C), 117.9, 118.5, 122.0, 123.6 (CH), 123.7 (C), 125.0, 125.6, 133.8, 134.5 (CH), 154.1, 154.6, 155.1, 173.8 (C).

MS (GC, 70eV): *m/z* (%) = 266 (M<sup>+</sup>, 100).

HRMS (EI): Calcd for C<sub>16</sub>H<sub>10</sub>O<sub>4</sub> (M+Na) 289.04713. Found 289.04668.

IR (ATR, cm<sup>-1</sup>):  $\tilde{\nu}$  = 3024 (w), 1641 (m), 1600 (m), 1557 (m), 1477 (w), 1416 (s), 1351 (m), 1331 (m), 1258 (m), 1210 (m), 1164 (m), 1100 (w), 1051 (s), 994 (w), 906 (m), 882 (m), 840 (m), 790 (w), 758 (s), 698 (s), 650 (m).

# (C) Copies of $^1\text{H}$ and $^{13}\text{C}$ NMR spectra

## Compound 3c

Mkrtchyan SM400 1H CDCl3

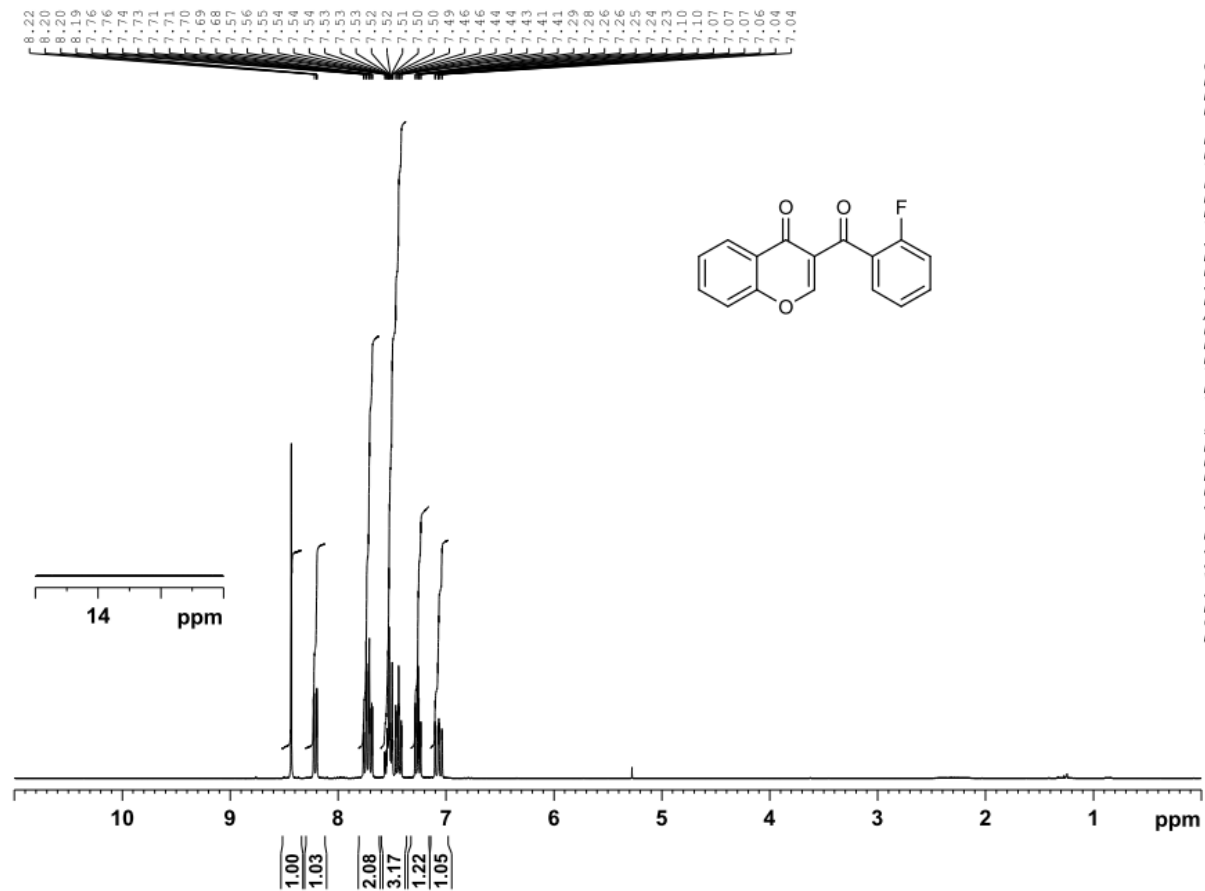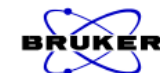

Current Data Parameters  
NAME 110216.u312 sm 400  
EXPNO 10  
PROCNO 1

F2 - Acquisition Parameters  
Date\_ 20110216  
Time 10.07  
INSTRUM spect  
PROBHD 5 mm PABBO BB-  
PULPROG zg30  
TD 65536  
SOLVENT CDCl3  
NS 16  
DS 2  
SWH 6168.119 Hz  
FIDRES 0.094423 Hz  
AQ 5.2953587 sec  
RG 114  
DW 80.800 usec  
DE 10.00 usec  
TE 298.2 K  
D1 1.00000000 sec  
TD0 1

===== CHANNEL f1 =====  
NUC1 1H  
P1 10.00 usec  
PL1 0.00 dB  
PL1W 11.25325108 W  
SFO1 300.1318534 MHz

F2 - Processing parameters  
SI 32768  
SF 300.1300107 MHz  
WDW EM  
SSB 0  
LB 0.30 Hz  
GB 0  
PC 1.00



# Compound 3c

Mkrtchyan RR783-1 13C CDC13

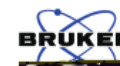

Current Data Parameters  
 NAME 130718.205 sr.  
 EXPNO 10  
 PROCNO 1

F2 - Acquisition Paramete:  
 Date\_ 20130718  
 Time 18.56  
 INSTRUM spect  
 PROBHD 5 mm PABBC  
 PULPROG zgpg30  
 TD 65536  
 SOLVENT CDCl3  
 NS 1024  
 DS 4  
 SWH 15000.000 H  
 FIDRES 0.228882 H  
 AQ 2.1845834 se  
 RG 2050  
 DW 33.333 usec  
 DE 10.00 usec  
 TE 298.3 K  
 D1 2.00000000 se  
 d11 0.03000000 se  
 DELTA 1.89999998  
 TD0 1

===== CHANNEL f1  
 NUC1 13C  
 P1 10.00 usec  
 PL1 -1.00 dB  
 SFO1 62.9015280 M

===== CHANNEL f2  
 CPDPRG2 waltz16  
 NUC2 1H  
 PCPD2 70.00 usec  
 PL12 15.00 dB  
 PL13 15.00 dB  
 PL2 -2.50 dB  
 SFO2 250.1310005 M

F2 - Processing paramete:  
 SI 32768  
 SF 62.8952393 M  
 WDW EM  
 SSB 0  
 LB 1.00 Hz  
 GB 0  
 PC 1.40

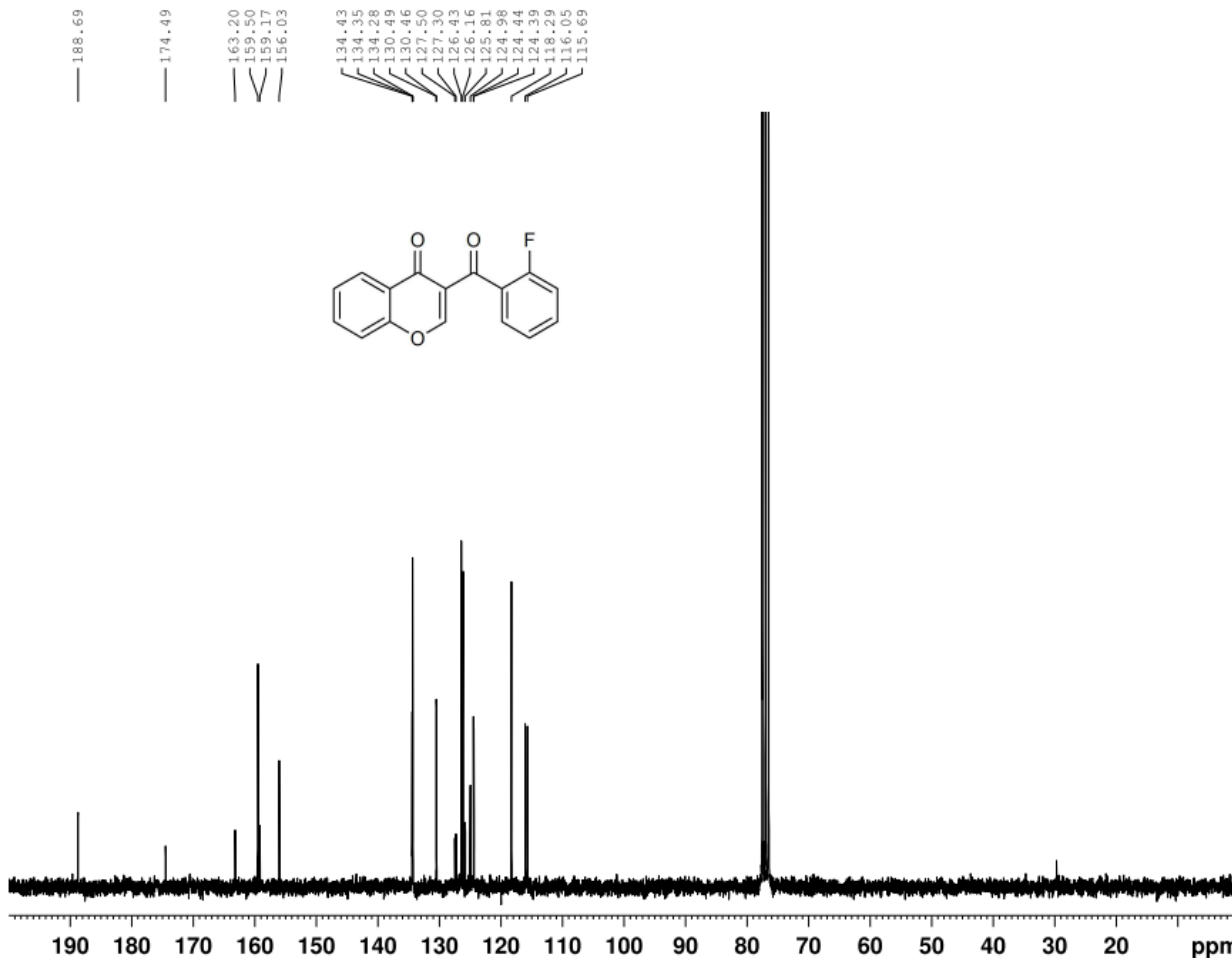

# Compound 3c

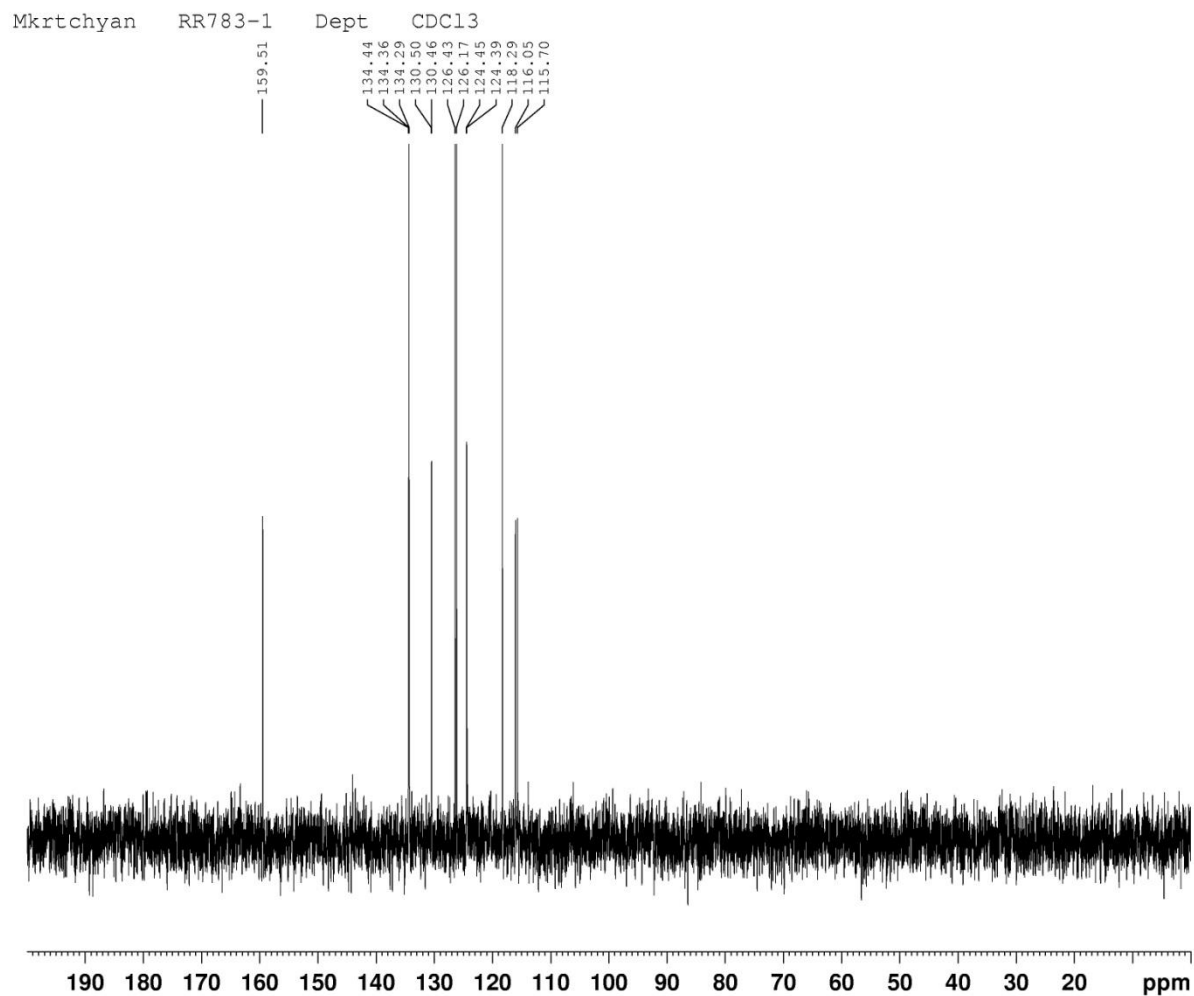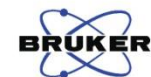

Current Data Parameters  
NAME 3a 130718.205  
EXPNO 11  
PROCNO 1

F2 - Acquisition Parameters  
Date\_ 20130718  
Time 19.15  
INSTRUM spect  
PROBHD 5 mm PABBO BB-  
PULPROG dept135  
TD 65536  
SOLVENT CDC13  
NS 256  
DS 4  
SWH 15000.000 Hz  
FIDRES 0.228882 Hz  
AQ 2.1845834 sec  
RG 2050  
DW 33.333 usec  
DE 10.00 usec  
TE 298.0 K  
CNST2 145.0000000  
D1 2.0000000 sec  
d12 0.00002000 sec  
d2 0.00344828 sec  
DELTA 0.00001273 sec  
TD0 1

===== CHANNEL f1 =====  
NUC1 13C  
P1 10.00 usec  
p2 20.00 usec  
PL1 -1.00 dB  
SFO1 62.9015280 MHz

===== CHANNEL f2 =====  
CPDPRG2 waltz16  
NUC2 1H  
P3 10.00 usec  
p4 20.00 usec  
PCPD2 70.00 usec  
PL12 15.00 dB  
PL2 -2.50 dB  
SFO2 250.1310005 MHz

F2 - Processing parameters  
SI 32768  
SF 62.8952390 MHz  
WDW EM  
SSB 0  
LB 1.00 Hz  
GB 0  
PC 1.40

# Compound 3d

Mkrtchyan SM 780-1 1H CDC13

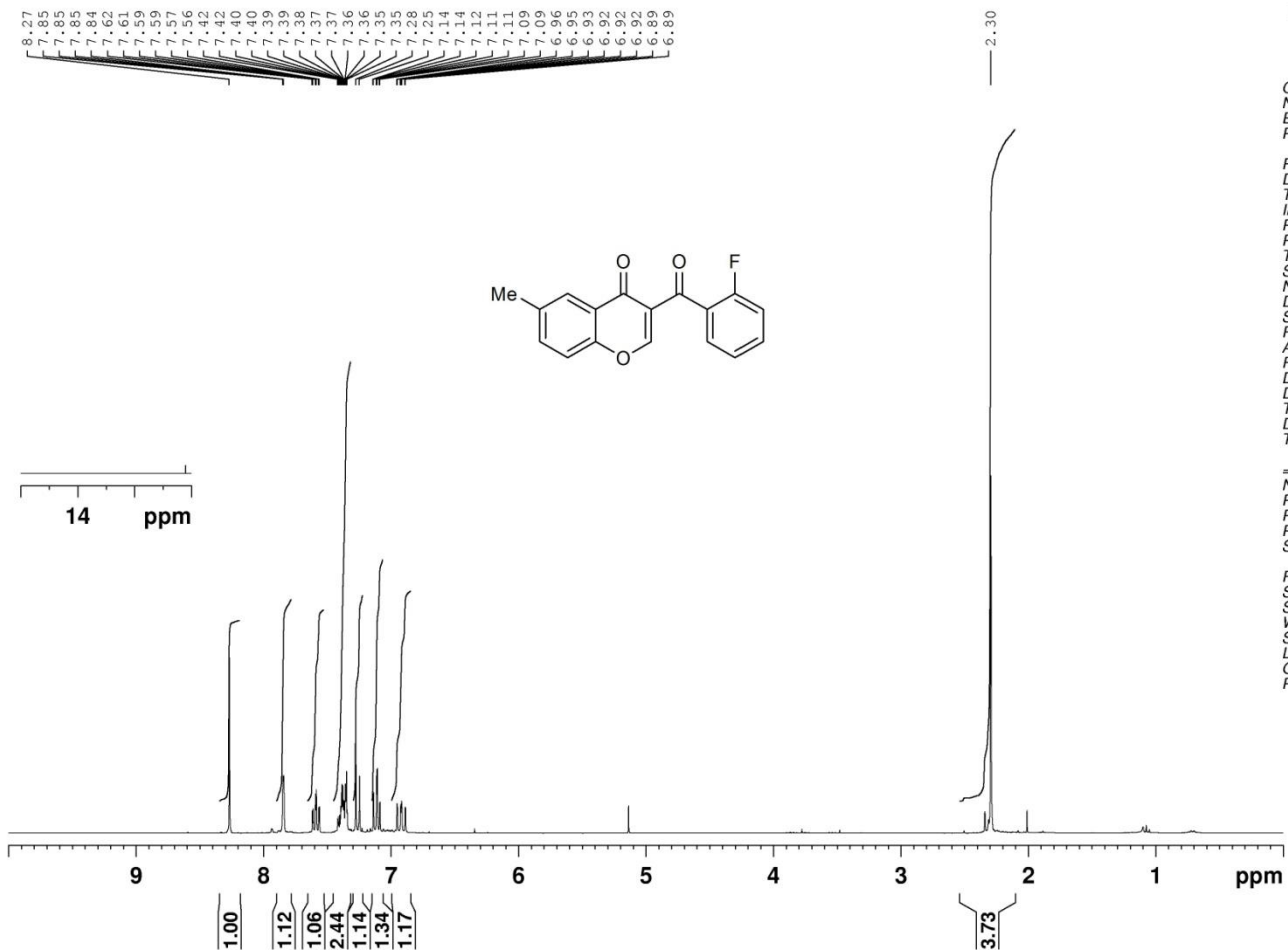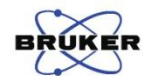

Current Data Paramete  
 NAME 130424.u315  
 EXPNO 10  
 PROCNO 1

F2 - Acquisition Param  
 Date\_ 20130424  
 Time 13.38  
 INSTRUM spect  
 PROBHD 5 mm PAB1  
 PULPROG zg30  
 TD 65536  
 SOLVENT CDCl  
 NS 16  
 DS 2  
 SWH 6188.119  
 FIDRES 0.094422  
 AQ 5.2953587 s  
 RG 144  
 DW 80.800 us  
 DE 10.00 use  
 TE 298.2 K  
 D1 1.00000000 s  
 TD0 1

===== CHANNEL 1  
 NUC1 1H  
 P1 10.00 use  
 PL1 0 dB  
 PL1W 11.2532510  
 SFO1 300.131853

F2 - Processing param  
 SI 32768  
 SF 300.1300545  
 WDW EM  
 SSB 0  
 LB 0.30 Hz  
 GB 0  
 PC 1.00

# Compound 3d

Mkrtchyan SM780-1 13C CDC13

188.81  
 174.58  
 174.55  
 162.84  
 159.48  
 159.42  
 154.28  
 136.29  
 135.49  
 134.31  
 134.19  
 130.48  
 130.45  
 127.52  
 127.35  
 125.75  
 125.57  
 124.59  
 124.38  
 124.34  
 118.00  
 115.97  
 115.67

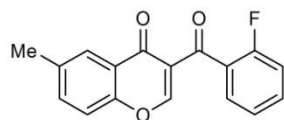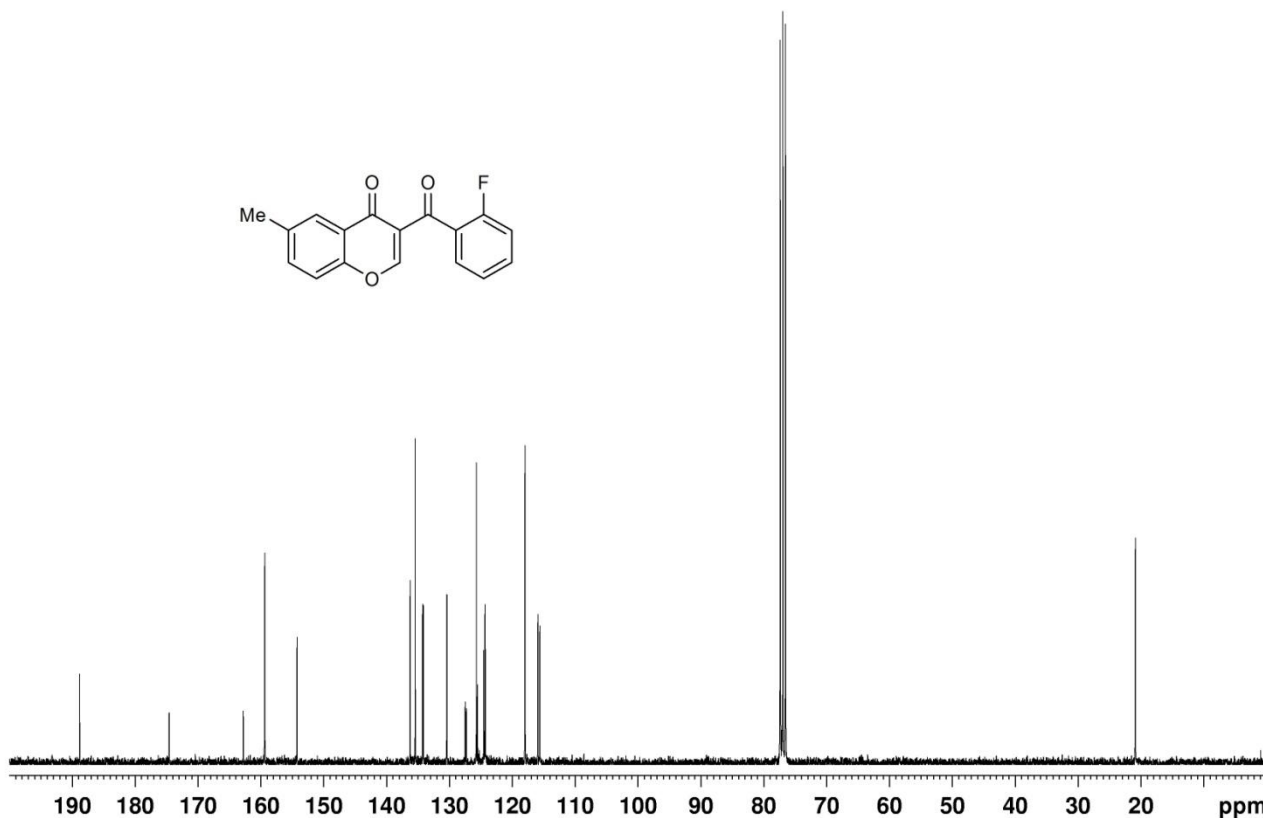

20.93

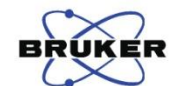

Current Data Paramet  
 NAME 140414.u305  
 EXPNO 13  
 PROCNO 1

F2 - Acquisition Param  
 Date 20140414  
 Time 19.55  
 INSTRUM spect  
 PROBHD 5 mm PAB  
 PULPROG zgpg.  
 TD 65536  
 SOLVENT CDC  
 NS 1024  
 DS 4  
 SWH 18028.846  
 FIDRES 0.27509  
 AQ 1.8175818  
 RG 2050  
 DW 27.733 us  
 DE 10.00 use  
 TE 298.2 K  
 D1 2.0000000  
 D11 0.0300000  
 TD0 1

==== CHANNEL  
 NUC1 13C  
 P1 10.00 use  
 PL1 -0.50 dB  
 PL1W 33.256919  
 SFO1 75.475295.

==== CHANNEL  
 CPDPRG2 waltz1  
 NUC2 1H  
 PCPD2 72.00  
 PL2 0 dB  
 PL12 17.00 dE  
 PL13 17.00 dE  
 PL2W 11.253251  
 PL12W 0.224531  
 PL13W 0.224531  
 SFO2 300.13120

F2 - Processing param  
 SI 32768  
 SF 75.4677536  
 WDW EM  
 SSB 0  
 LB 1.00 Hz  
 GB 0  
 PC 1.40

# Compound 3d

Mkrtchyan SM780-1 Dept CDC13

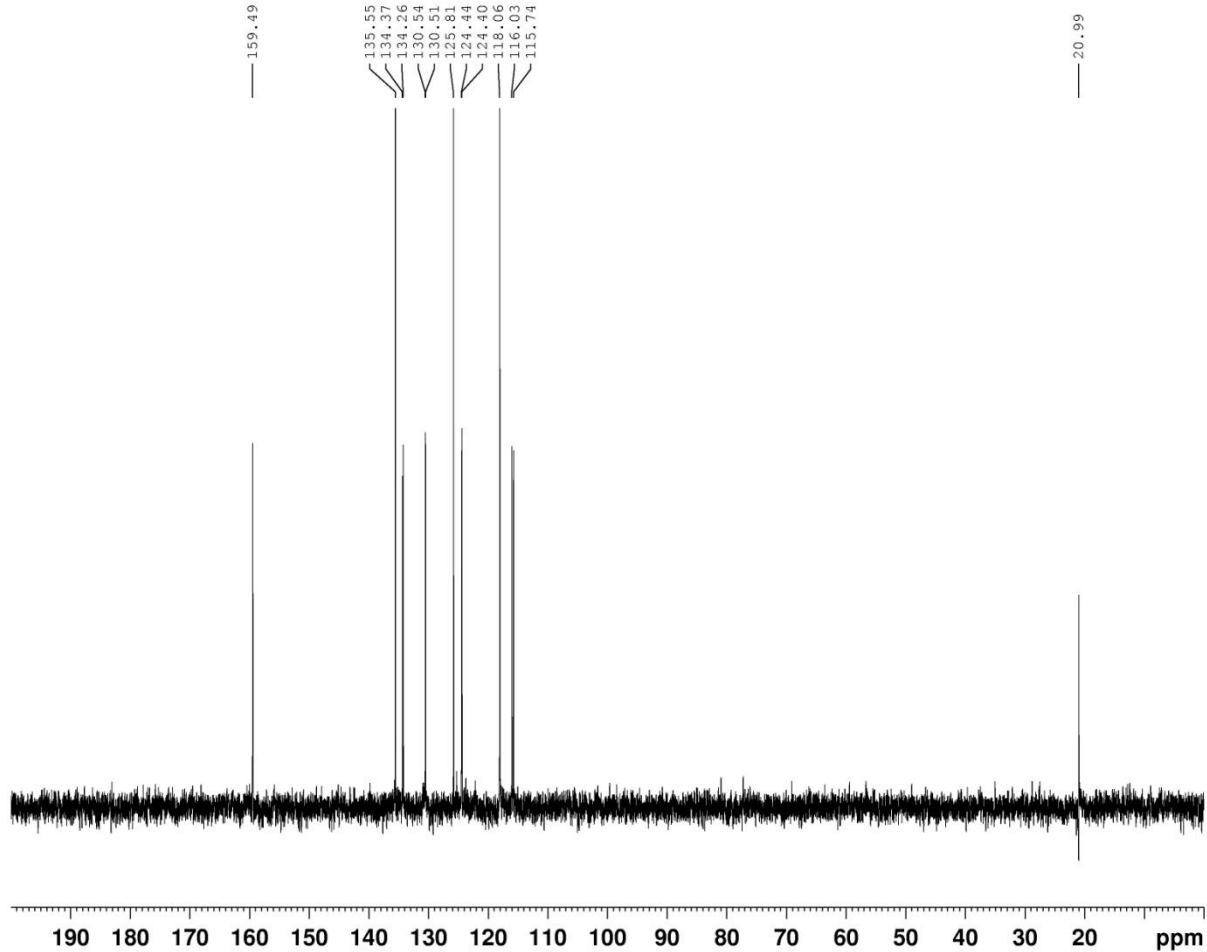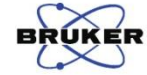

Current Data Parameters  
NAME 3b 140414.u309  
EXPNO 12  
PROCNO 1

F2 - Acquisition Parameters  
Date 20140414  
Time 15.04  
INSTRUM spect  
PROBHD 5 mm PABBO BB-  
PULPROG dept135  
TD 65536  
SOLVENT CDCl3  
NS 256  
DS 4  
SWH 18028.846 Hz  
FIDRES 0.275098 Hz  
AQ 1.8175818 sec  
RG 2050  
DW 27.733 usec  
DE 10.00 usec  
TE 298.2 K  
CNST2 145.000000  
D1 2.00000000 sec  
D2 0.00344828 sec  
D12 0.00002000 sec  
TD0 1

===== CHANNEL f1 =====  
NUC1 13C  
P1 10.00 usec  
P2 20.00 usec  
PL1 -0.50 dB  
PL1W 33.25691986 W  
SFO1 75.4752953 MHz

===== CHANNEL f2 =====  
CPDPRG2 waltz16  
NUC2 1H  
P3 10.00 usec  
P4 20.00 usec  
PCPD2 72.00 usec  
PL2 0 dB  
PL12 17.00 dB  
PL2W 11.25325108 W  
PL12W 0.22453187 W  
SFO2 300.1312005 MHz

F2 - Processing parameters  
SI 32768  
SF 75.4677490 MHz  
WDW EM  
SSB 0  
LB 1.00 Hz  
GB 0  
PC 1.40

# Compound 3e

Mkrtchyan SM458 1H CDC13

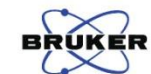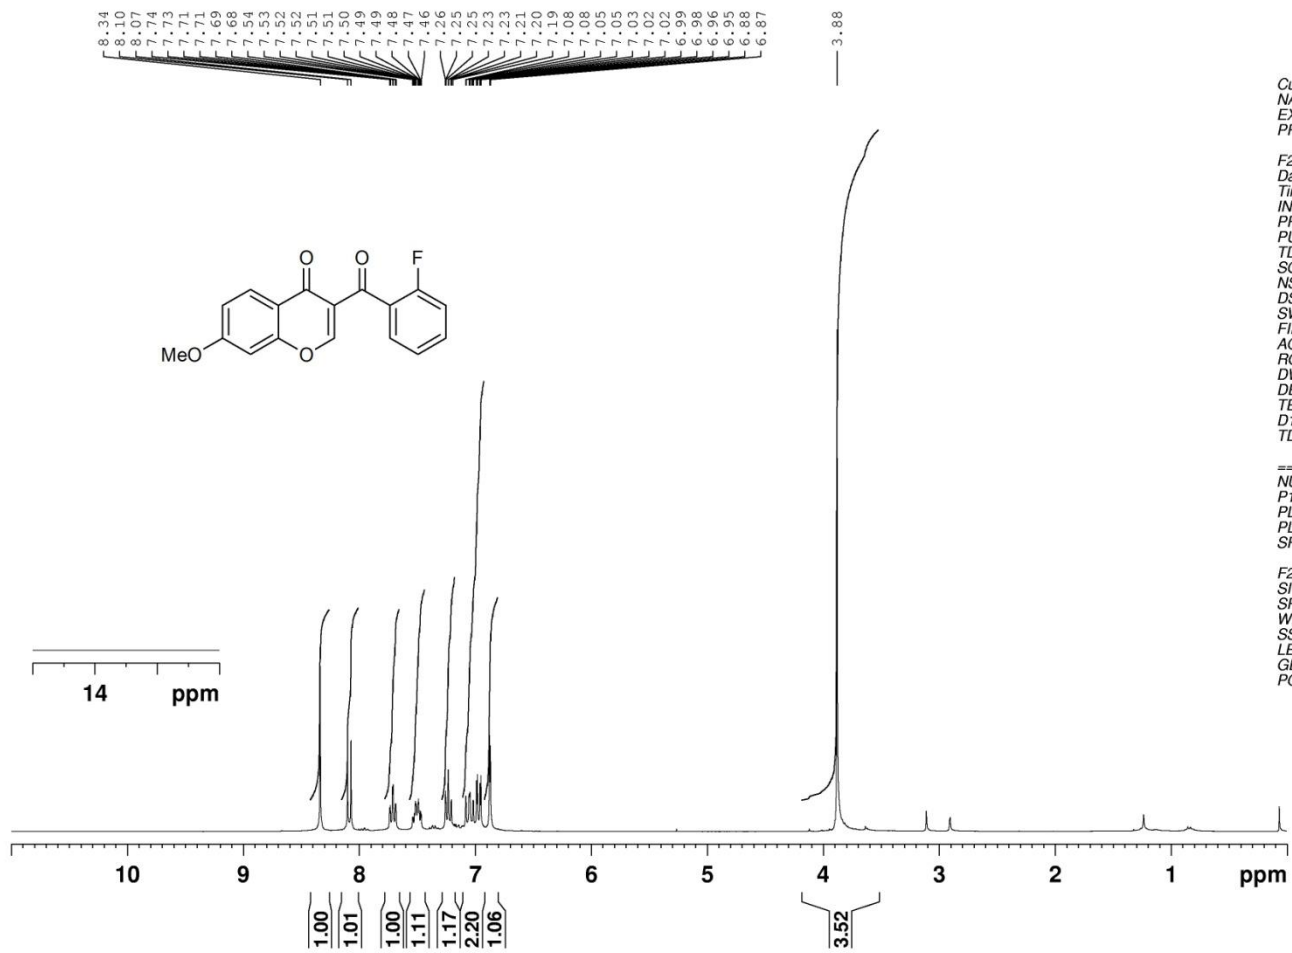

Current Data Parameter:  
 NAME 110411.u340 s  
 EXPNO 10  
 PROCNO 1

F2 - Acquisition Parame  
 Date\_ 20110411  
 Time 14.40  
 INSTRUM spect  
 PROBHD 5 mm PABBT  
 PULPROG zg30  
 TD 65536  
 SOLVENT CDC13  
 NS 16  
 DS 2  
 SWH 6188.119 H  
 FIDRES 0.094423  
 AQ 5.2953587 se  
 RG 71.8  
 DW 80.800 use  
 DE 10.00 usec  
 TE 298.2 K  
 D1 1.00000000 se  
 TD0 1

===== CHANNEL f1  
 NUC1 1H  
 P1 10.00 usec  
 PL1 0 dB  
 PL1W 11.25325108  
 SFO1 300.1318534

F2 - Processing parame  
 SI 32768  
 SF 300.1300133 M  
 WDW EM  
 SSB 0  
 LB 0.30 Hz  
 GB 0  
 PC 1.00

# Compound 3e

Mkrtchyan SM458 13C CDC13

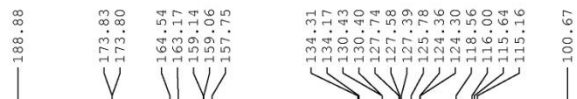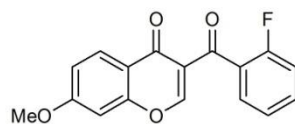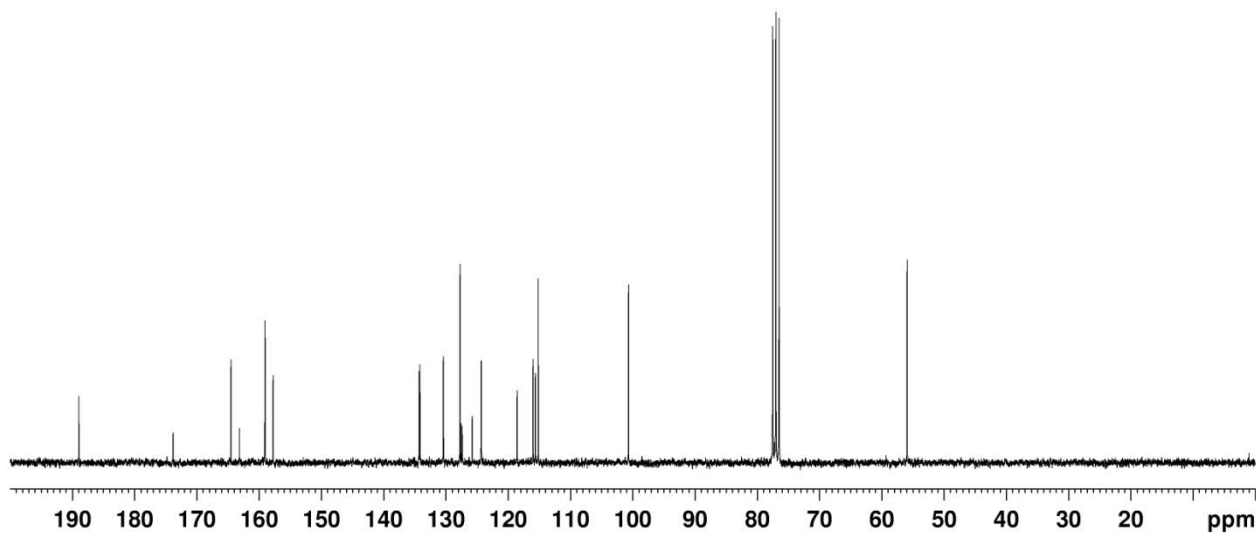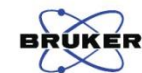

Current Data Paramete  
 NAME 140407.210 s  
 EXPNO 10  
 PROCNO 1

F2 - Acquisition Param  
 Date\_ 20140408  
 Time 9.26  
 INSTRUM spect  
 PROBHD 5 mm PAB1  
 PULPROG zgpg3  
 TD 65536  
 SOLVENT CDCl  
 NS 1024  
 DS 4  
 SWH 15000.000  
 FIDRES 0.228882  
 AQ 2.1845834 s  
 RG 2050  
 DW 33.333 us  
 DE 10.00 usec  
 TE 298.0 K  
 D1 2.0000000 s  
 d11 0.0300000 s  
 DELTA 1.8999999  
 TD0 1

===== CHANNEL 1 :  
 NUC1 13C  
 P1 10.00 usec  
 PL1 -1.00 dB  
 SFO1 62.9015280

===== CHANNEL 2 :  
 CPDPRG2 waltz1  
 NUC2 1H  
 PCPD2 70.00 usec  
 PL12 15.00 dB  
 PL13 15.00 dB  
 PL2 -2.50 dB  
 SFO2 250.131000

F2 - Processing param  
 SI 32768  
 SF 62.8952406 MHz  
 WDW EM  
 SSB 0  
 LB 1.00 Hz  
 GB 0  
 PC 1.40

# Compound 3f

Mkrtchyan SM795 1H CDC13

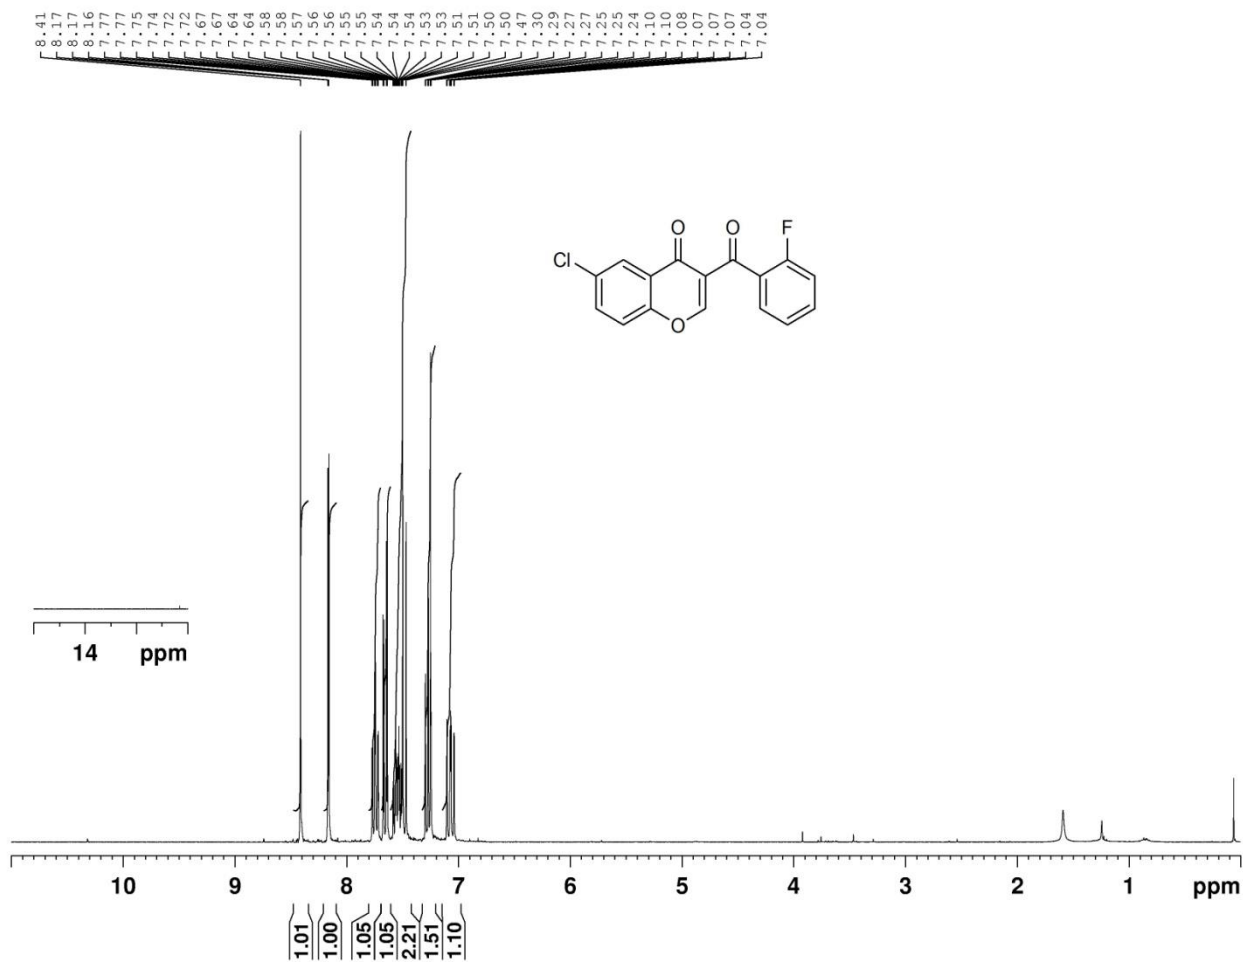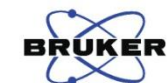

Current Data Parameters  
NAME 130614.u303 sm  
EXPNO 10  
PROCNO 1

F2 - Acquisition Paramete  
Date\_ 20130614  
Time 8.03  
INSTRUM spect  
PROBHD 5 mm PABBO .  
PULPROG zg30  
TD 65536  
SOLVENT CDCl3  
NS 16  
DS 2  
SWH 6188.119 Hz  
FIDRES 0.094423 Hz  
AQ 5.2953587 sec  
RG 228  
DW 80.800 usec  
DE 10.00 usec  
TE 298.2 K  
D1 1.00000000 sec  
TD0 1

===== CHANNEL f1 =  
NUC1 1H  
P1 10.00 usec  
PL1 0 dB  
PL1W 11.25325108 W  
SFO1 300.1318534 M

F2 - Processing paramete  
SI 32768  
SF 300.1300132 MH  
WDW EM  
SSB 0  
LB 0.30 Hz  
GB 0  
PC 1.00



# Compound 3f

Mkrtchyan SM793 13C CDC13

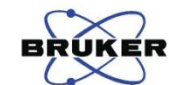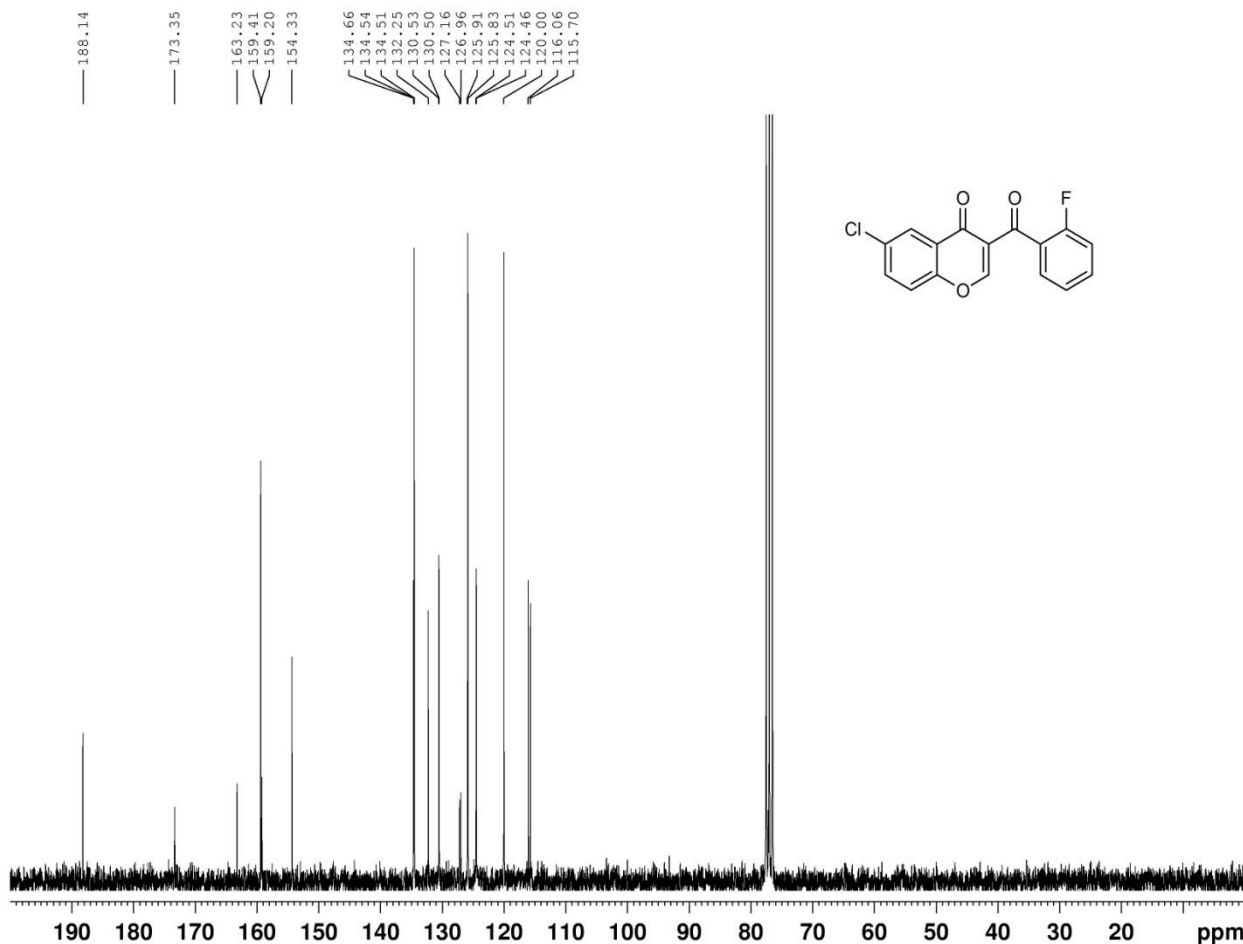

Current Data Parameters  
 NAME 140407.211 sm  
 EXPNO 10  
 PROCNO 1

F2 - Acquisition Paramet  
 Date 20140408  
 Time 10.34  
 INSTRUM spect  
 PROBHD 5 mm PABBC  
 PULPROG zgpg30  
 TD 65536  
 SOLVENT CDCl3  
 NS 627  
 DS 4  
 SWH 15000.000 H  
 FIDRES 0.228882 H  
 AQ 2.1845834 sec  
 RG 2050  
 DW 33.333 usec  
 DE 10.00 usec  
 TE 298.1 K  
 D1 2.0000000 sec  
 d11 0.0300000 sec  
 DELTA 1.8999998 s  
 TDO 1

===== CHANNEL f1 :  
 NUC1 13C  
 P1 10.00 usec  
 PL1 -1.00 dB  
 SFO1 62.9015280 M

===== CHANNEL f2 :  
 CPDPRG2 waltz16  
 NUC2 1H  
 PCPD2 70.00 usec  
 PL12 15.00 dB  
 PL13 15.00 dB  
 PL2 -2.50 dB  
 SFO2 250.1310005 I

F2 - Processing paramet  
 SI 32768  
 SF 62.8952402 MHz  
 WDW EM  
 SSB 0  
 LB 1.00 Hz  
 GB 0  
 PC 1.40

# Compound 3g

Mkrtchyan SM796 1H CDC13

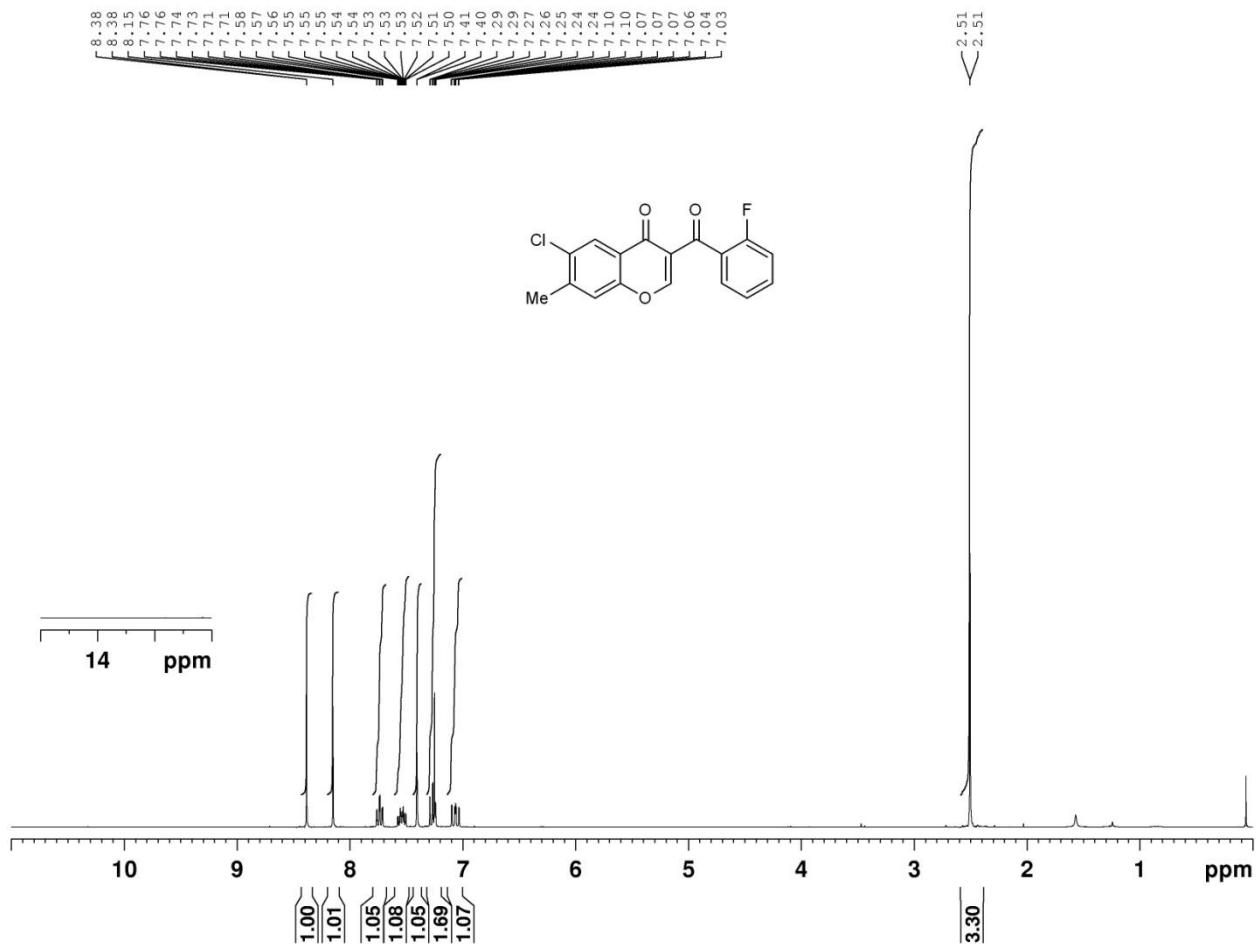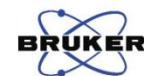

Current Data Parameters  
 NAME 130614.u304  
 EXPNO 10  
 PROCNO 1

F2 - Acquisition Parameters  
 Date\_ 20130614  
 Time 8.13  
 INSTRUM spect  
 PROBHD 5 mm PABE  
 PULPROG zg30  
 TD 65536  
 SOLVENT CDCl3  
 NS 16  
 DS 2  
 SWH 6188.1191  
 FIDRES 0.094423  
 AQ 5.2953587 s  
 RG 287  
 DW 80.800 us  
 DE 10.00 usec  
 TE 298.2 K  
 D1 1.0000000 s  
 TD0 1

===== CHANNEL f  
 NUC1 1H  
 P1 10.00 usec  
 PL1 0 dB  
 PL1W 11.2532510  
 SFO1 300.131853

F2 - Processing parameters  
 SI 32768  
 SF 300.13001301  
 WDW EM  
 SSB 0  
 LB 0.30 Hz  
 GB 0  
 PC 1.00

# Compound 3g

Mkrtchyan SM796 13C CDC13

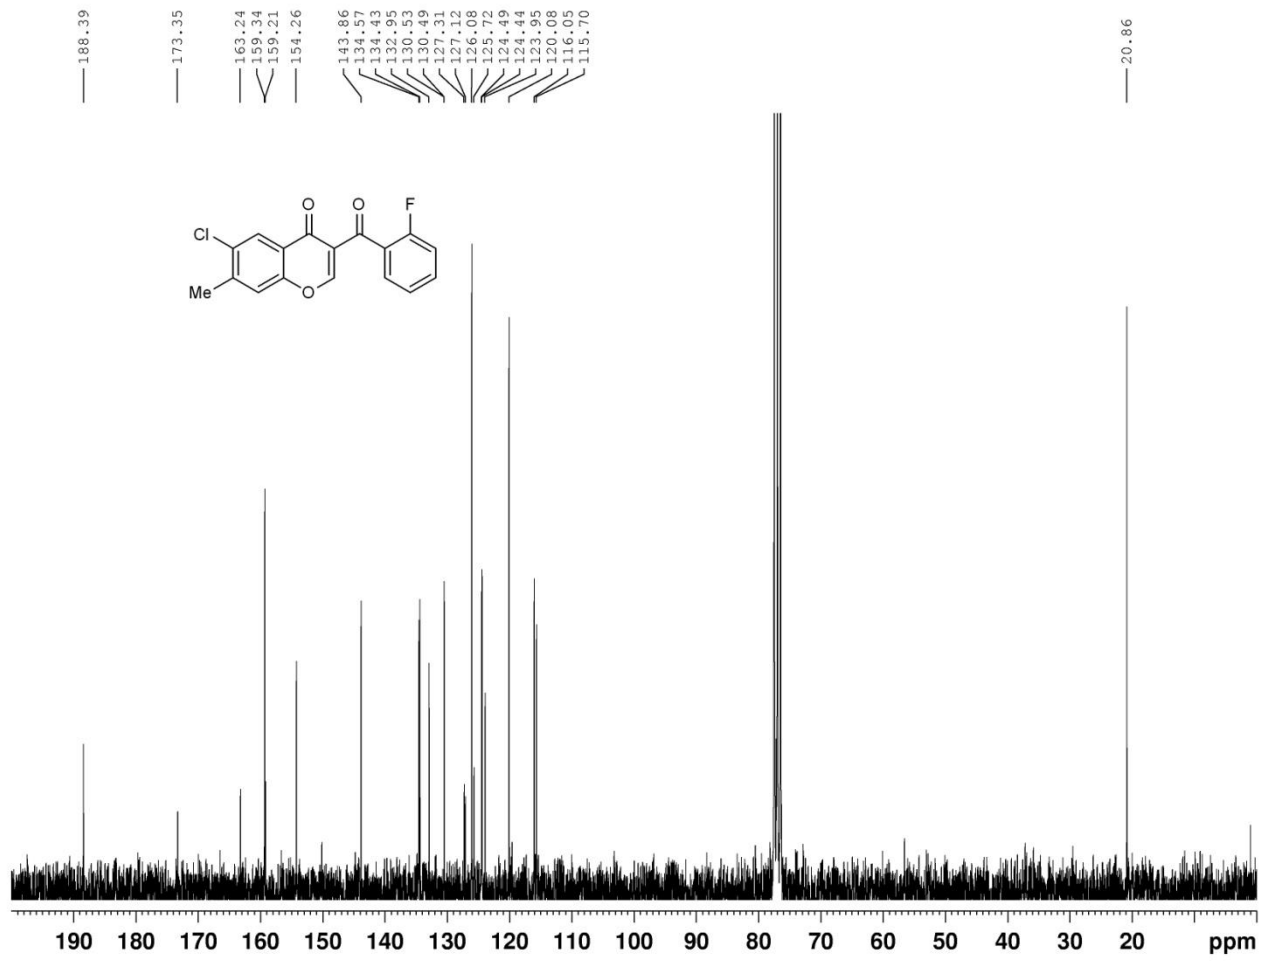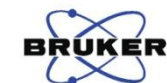

Current Data Parameters  
 NAME 140407.212  
 EXPNO 10  
 PROCNO 1

F2 - Acquisition Parameters  
 Date\_ 20140408  
 Time 12.36  
 INSTRUM spect  
 PROBHD 5 mm PAB  
 PULPROG zgpg  
 TD 65536  
 SOLVENT CDCl3  
 NS 1024  
 DS 4  
 SWH 15000.000  
 FIDRES 0.228888  
 AQ 2.1845834 s  
 RG 2050  
 DW 33.333 us  
 DE 10.00 use  
 TE 298.0 K  
 D1 2.0000000 s  
 d11 0.0300000  
 DELTA 1.899999 s  
 TD0 1

===== CHANNEL  
 NUC1 13C  
 P1 10.00 use  
 PL1 -1.00 dB  
 SFO1 62.901528

===== CHANNEL  
 CPDPRG2 waltz1  
 NUC2 1H  
 PCPD2 70.00 L  
 PL12 15.00 dB  
 PL13 15.00 dB  
 PL2 -2.50 dB  
 SFO2 250.131000

F2 - Processing parameters  
 SI 32768  
 SF 62.8952388  
 WDW EM  
 SSB 0  
 LB 1.00 Hz  
 GB 0  
 PC 1.40

# Compound 3h

Mkrtchyan SM443 1H CDC13

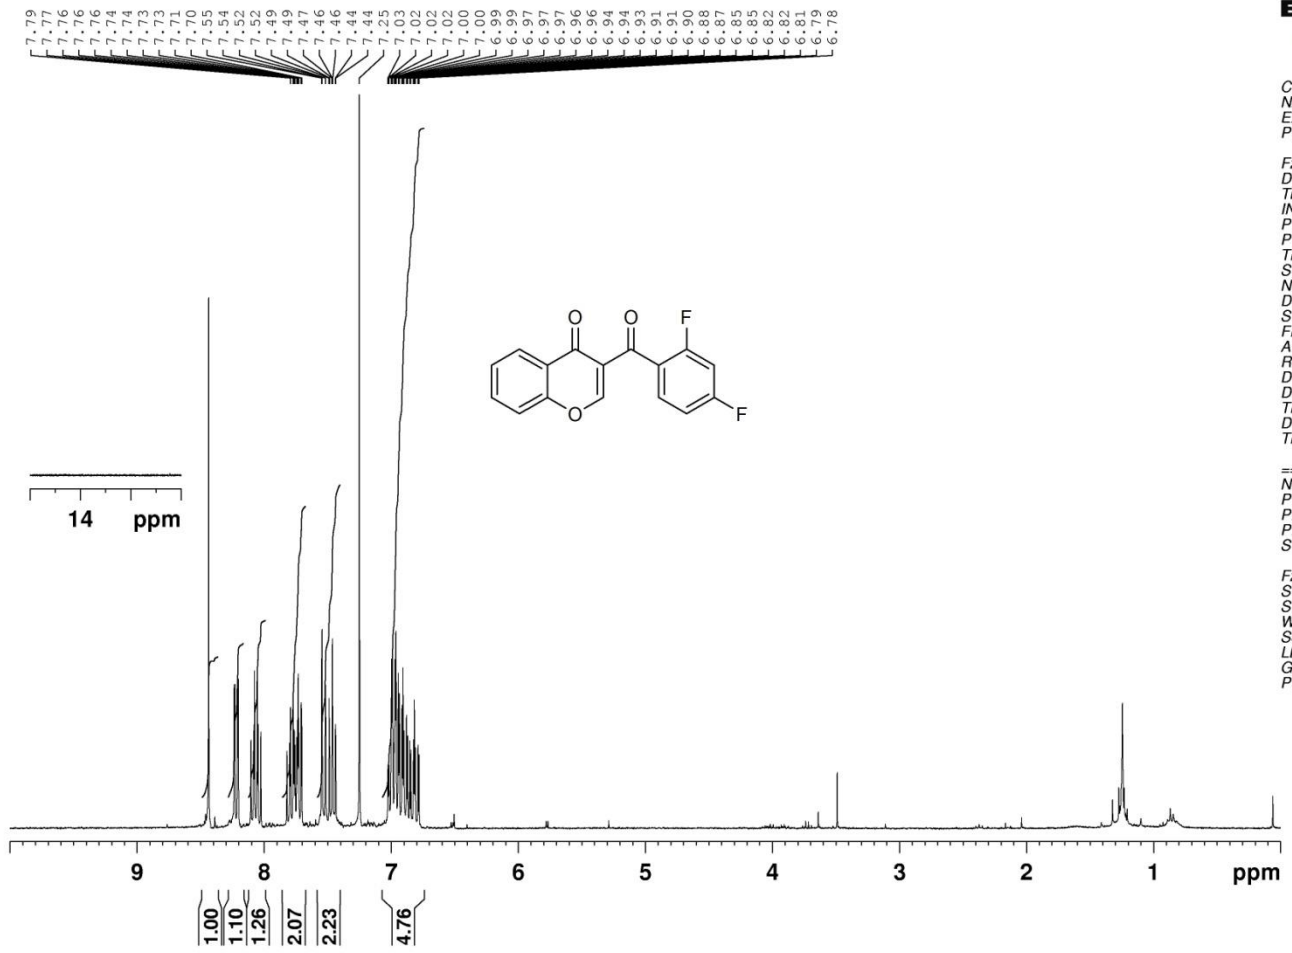

Current Data Parameter  
 NAME 110401.u324  
 EXPNO 10  
 PROCNO 1

F2 - Acquisition Parameter  
 Date\_ 20110401  
 Time 10.58  
 INSTRUM spect  
 PROBHD 5 mm PABP  
 PULPROG zg30  
 TD 65536  
 SOLVENT CDCl3  
 NS 16  
 DS 2  
 SWH 6188.119 Hz  
 FIDRES 0.094423  
 AQ 5.2953587 s  
 RG 362  
 DW 80.800 usec  
 DE 10.00 usec  
 TE 298.2 K  
 D1 1.00000000 s  
 TDO 1

==== CHANNEL f  
 NUC1 1H  
 P1 10.00 usec  
 PL1 0 dB  
 PL1W 11.2532510  
 SFO1 300.1318534

F2 - Processing parameter  
 SI 32768  
 SF 300.1300111 MHz  
 WDW EM  
 SSB 0  
 LB 0.30 Hz  
 GB 0  
 PC 1.00

# Compound 3h

Mkrtchyan SM814 13C CDC13

187.27  
 174.48  
 174.45  
 167.93  
 167.73  
 164.15  
 163.95  
 163.85  
 163.65  
 160.07  
 159.87  
 159.51  
 155.99  
 134.43  
 132.38  
 132.32  
 132.21  
 132.15  
 126.35  
 126.22  
 125.65  
 124.84  
 124.09  
 124.03  
 123.89  
 123.83  
 118.29  
 112.16  
 112.11  
 111.82  
 111.77  
 104.68  
 104.27  
 103.86

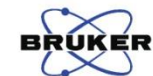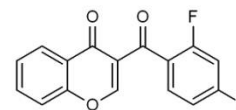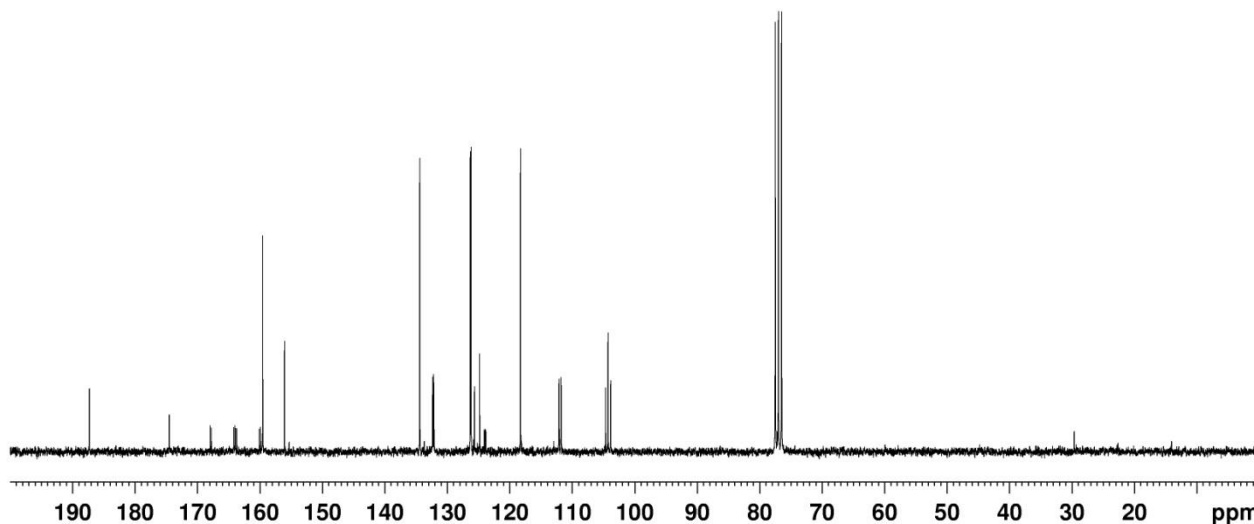

Current Data Paramete  
 NAME 130718.206 s  
 EXPNO 10  
 PROCNO 1

F2 - Acquisition Param  
 Date\_ 20130718  
 Time 20.32  
 INSTRUM spect  
 PROBHD 5 mm PABt  
 PULPROG zgpgc  
 TD 65536  
 SOLVENT CDCl  
 NS 1024  
 DS 4  
 SWH 15000.000  
 FIDRES 0.228882  
 AQ 2.1845834 s  
 RG 2050  
 DW 33.333 us  
 DE 10.00 use  
 TE 298.1 K  
 D1 2.0000000 s  
 d11 0.0300000 s  
 DELTA 1.8999999  
 TD0 1

===== CHANNEL 1  
 NUC1 13C  
 P1 10.00 usec  
 PL1 -1.00 dB  
 SFO1 62.9015280

===== CHANNEL 2  
 CPDPRG2 waltz1  
 NUC2 1H  
 PCPD2 70.00 u  
 PL12 15.00 dB  
 PL13 15.00 dB  
 PL2 -2.50 dB  
 SFO2 250.131000

F2 - Processing param  
 SI 32768  
 SF 62.8952406 M  
 WDW EM  
 SSB 0  
 LB 1.00 Hz  
 GB 0  
 PC 1.40

# Compound 3i

Mkrtchyan SM-442 1H CDC13

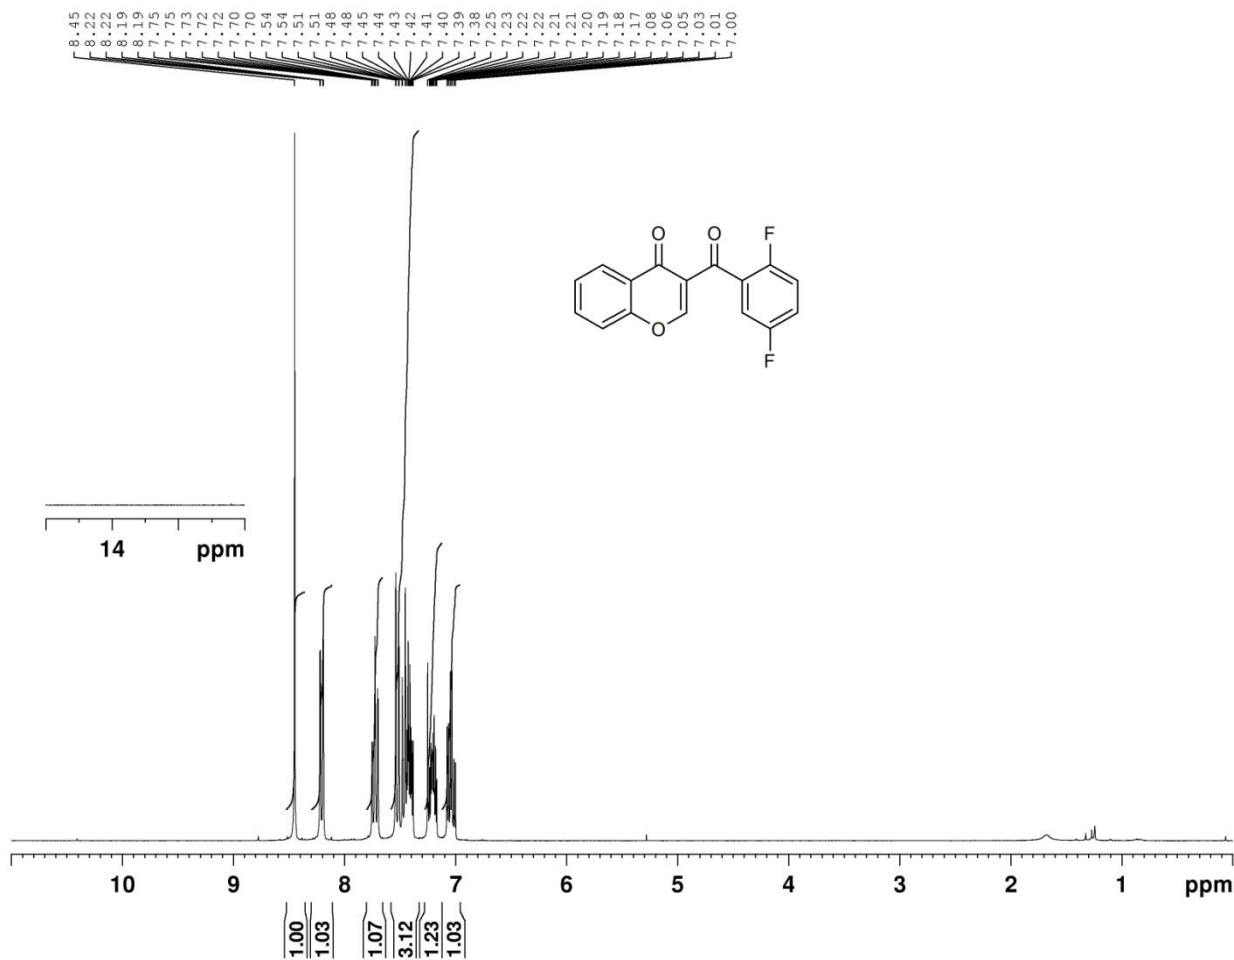

8.45  
8.22  
8.22  
8.19  
8.19  
7.75  
7.75  
7.72  
7.72  
7.70  
7.64  
7.54  
7.51  
7.51  
7.48  
7.45  
7.45  
7.45  
7.42  
7.41  
7.39  
7.38  
7.35  
7.25  
7.22  
7.22  
7.21  
7.21  
7.20  
7.19  
7.19  
7.18  
7.08  
7.06  
7.05  
7.05  
7.01  
7.00

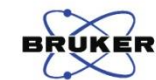

Current Data Parameters  
 NAME 110328.u313 sm 4  
 EXPNO 10  
 PROCNO 1

F2 - Acquisition Parameters  
 Date\_ 20110328  
 Time 10.38  
 INSTRUM spect  
 PROBHD 5 mm PABBO B1  
 PULPROG zg30  
 TD 65536  
 SOLVENT CDCl3  
 NS 16  
 DS 2  
 SWH 6188.119 Hz  
 FIDRES 0.094423 Hz  
 AQ 5.2953587 sec  
 RG 161  
 DW 80.800 usec  
 DE 10.00 usec  
 TE 298.2 K  
 D1 1.0000000 sec  
 TD0 1

===== CHANNEL f1 =====  
 NUC1 1H  
 P1 10.00 usec  
 PL1 0 dB  
 PL1W 11.25325108 W  
 SFO1 300.1318534 MH.

F2 - Processing parameters  
 SI 32768  
 SF 300.1300109 MHz  
 WDW EM  
 SSB 0  
 LB 0.30 Hz  
 GB 0  
 PC 1.00

# Compound 3i

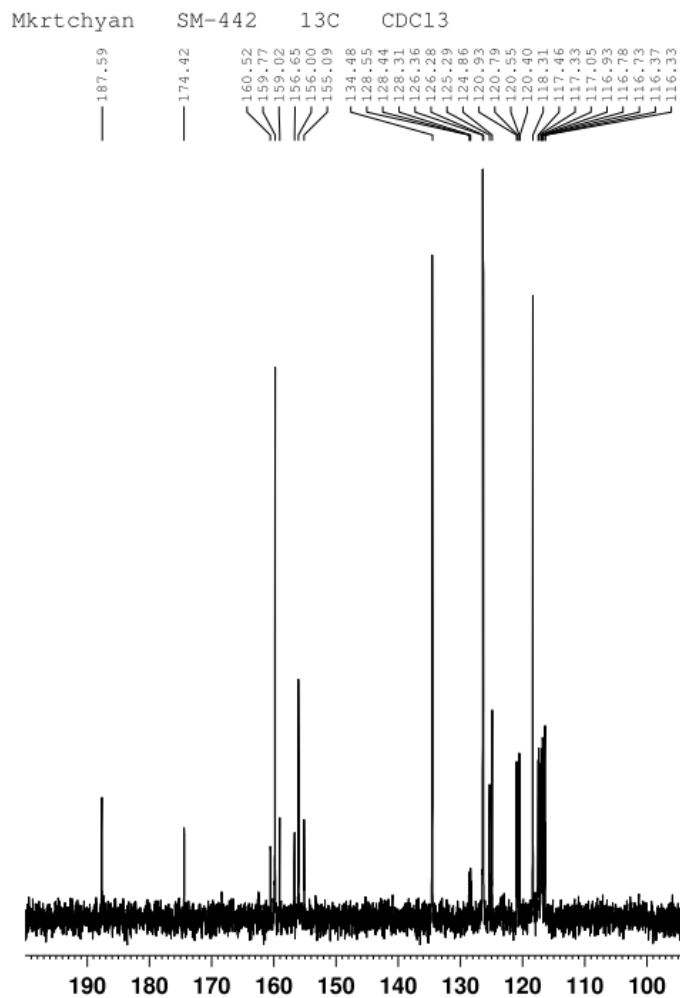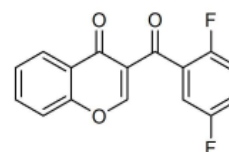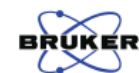

Current Data Paramet  
 NAME 110328.209  
 EXPNO 10  
 PROCNO 1

F2 - Acquisition Parar  
 Date\_ 20110328  
 Time 19.55  
 INSTRUM spec  
 PROBHD 5 mm PAB  
 PULPROG zgpg  
 TD 65536  
 SOLVENT CDC  
 NS 1024  
 DS 4  
 SWH 15000.000  
 FIDRES 0.22888  
 AQ 2.1845834  
 RG 2050  
 DW 33.333 us  
 DE 10.00 us  
 TE 298.2 K  
 D1 2.00000000  
 d11 0.03000000  
 DELTA 1.8999999  
 TDO 1

===== CHANNEL  
 NUC1 13C  
 P1 10.00 usec  
 PL1 -1.00 dE  
 SFO1 62.901528

===== CHANNEL  
 CPDPRG2 waltz  
 NUC2 1H  
 PCPD2 70.00 us  
 PL12 15.00 dt  
 PL13 15.00 dt  
 PL2 -2.50 dE  
 SFO2 250.131000

F2 - Processing parar  
 SI 32768  
 SF 62.8952402  
 WDW EM  
 SSB 0  
 LB 1.00 Hz  
 GB 0  
 PC 1.40

# Compound 3j

Mkrtchyan SM460 1H CDCl3

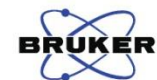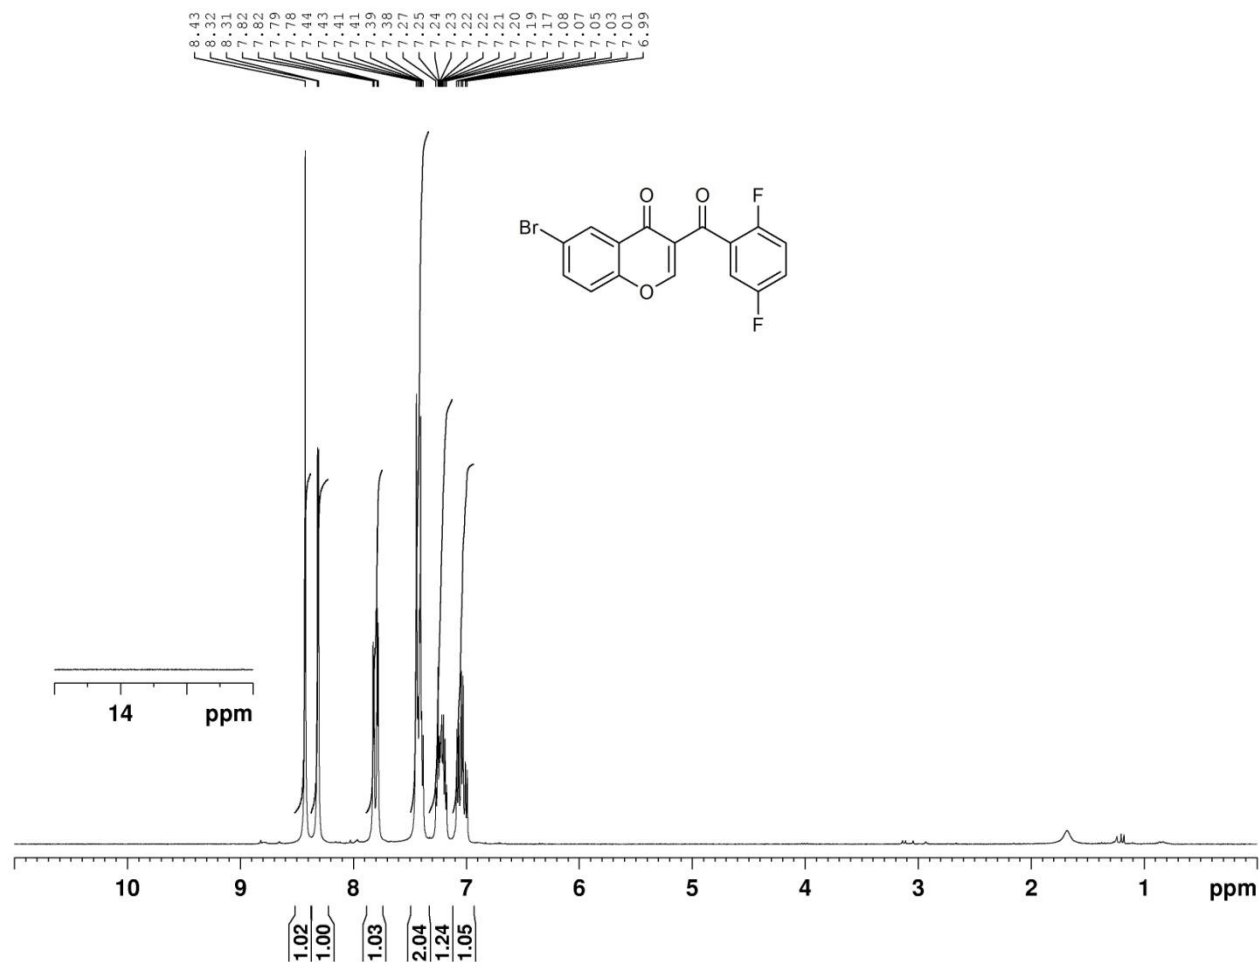

8.43  
8.32  
8.31  
7.82  
7.79  
7.78  
7.44  
7.43  
7.41  
7.41  
7.39  
7.38  
7.27  
7.25  
7.24  
7.23  
7.22  
7.22  
7.21  
7.20  
7.19  
7.17  
7.08  
7.07  
7.03  
7.01  
6.99

Current Data Parameters  
NAME 110406.213  
EXPNO 10  
PROCNO 1

F2 - Acquisition Parameters  
Date\_ 20110406  
Time 11.54  
INSTRUM spect  
PROBHD 5 mm PAB  
PULPROG zg30  
TD 65536  
SOLVENT CDCl  
NS 16  
DS 2  
SWH 5165.289  
FIDRES 0.078814  
AQ 6.3439350 s  
RG 575  
DW 96.800 us  
DE 10.00 use  
TE 298.0 K  
D1 1.00000000 s  
TD0 1

===== CHANNEL  
NUC1 1H  
P1 10.00 use  
PL1 -2.50 dB  
SFO1 250.131544

F2 - Processing parameters  
SI 32768  
SF 250.130029  
WDW EM  
SSB 0  
LB 0.30 Hz  
GB 0  
PC 1.00



# Compound 3j

Mkrtchyan SM460 13C CDC13

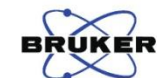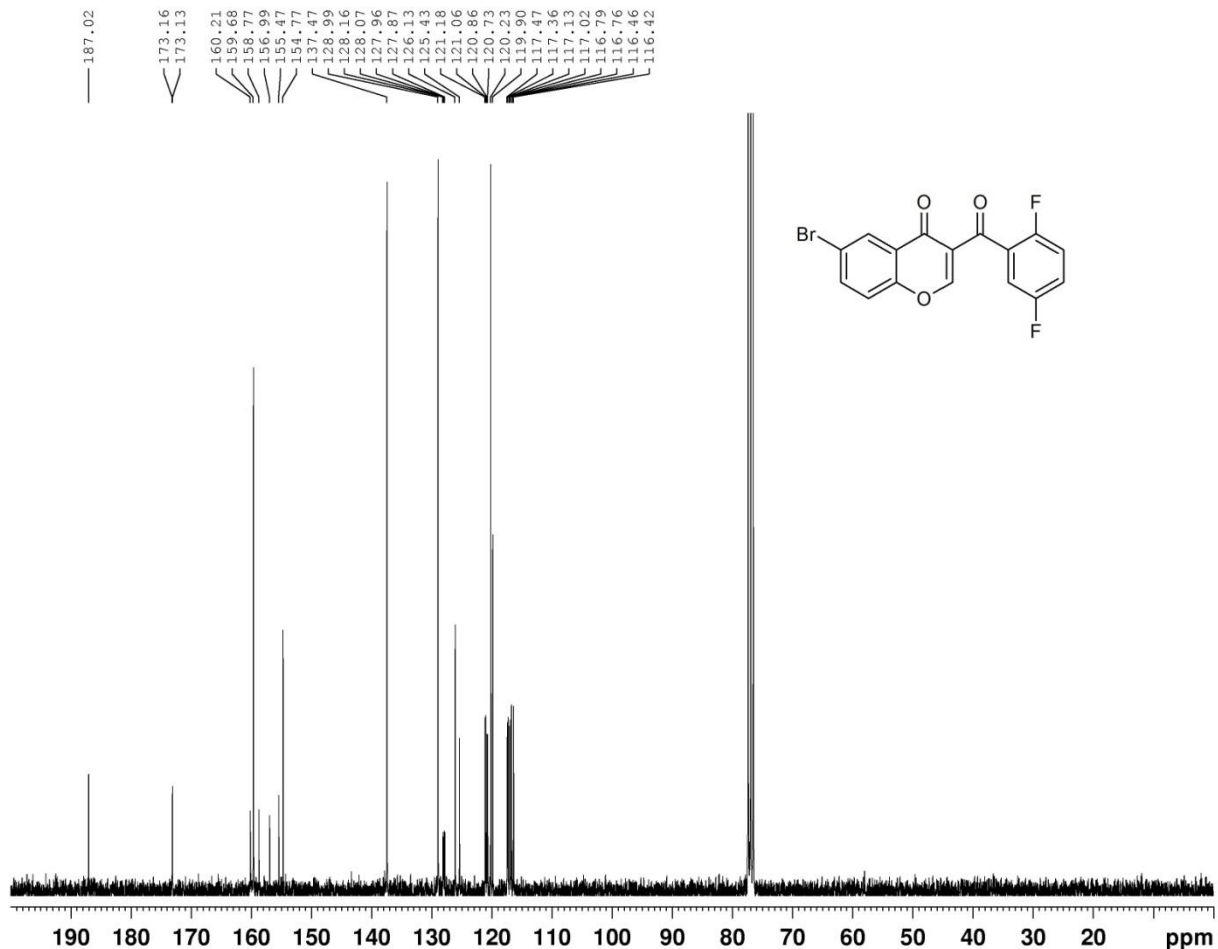

Current Data Parameters  
 NAME 110407.u344 sm 46  
 EXPNO 11  
 PROCNO 1

F2 - Acquisition Parameters  
 Date\_ 20110408  
 Time 12.10  
 INSTRUM spect  
 PROBHD 5 mm PABBO BB-  
 PULPROG zgpg30  
 TD 65536  
 SOLVENT CDCl3  
 NS 512  
 DS 4  
 SWH 18028.846 Hz  
 FIDRES 0.275098 Hz  
 AQ 1.8175818 sec  
 RG 2050  
 DW 27.733 usec  
 DE 10.00 usec  
 TE 298.4 K  
 D1 2.00000000 sec  
 D11 0.03000000 sec  
 TD0 1

==== CHANNEL f1 ====  
 NUC1 13C  
 P1 10.00 usec  
 PL1 -0.50 dB  
 PL1W 33.25691986 W  
 SFO1 75.4752953 MHz

==== CHANNEL f2 ====  
 CPDPRG2 waltz16  
 NUC2 1H  
 PCPD2 72.00 usec  
 PL2 0 dB  
 PL12 17.00 dB  
 PL13 17.00 dB  
 PL2W 11.25325108 W  
 PL12W 0.22453187 W  
 PL13W 0.22453187 W  
 SFO2 300.1312005 MHz

F2 - Processing parameters  
 SI 32768  
 SF 75.4677525 MHz  
 WDW EM  
 SSB 0  
 LB 1.00 Hz  
 GB 0  
 PC 1.40

# Compound 3k

Mkrtchyan SM815 1H CDC13

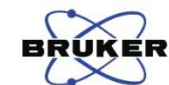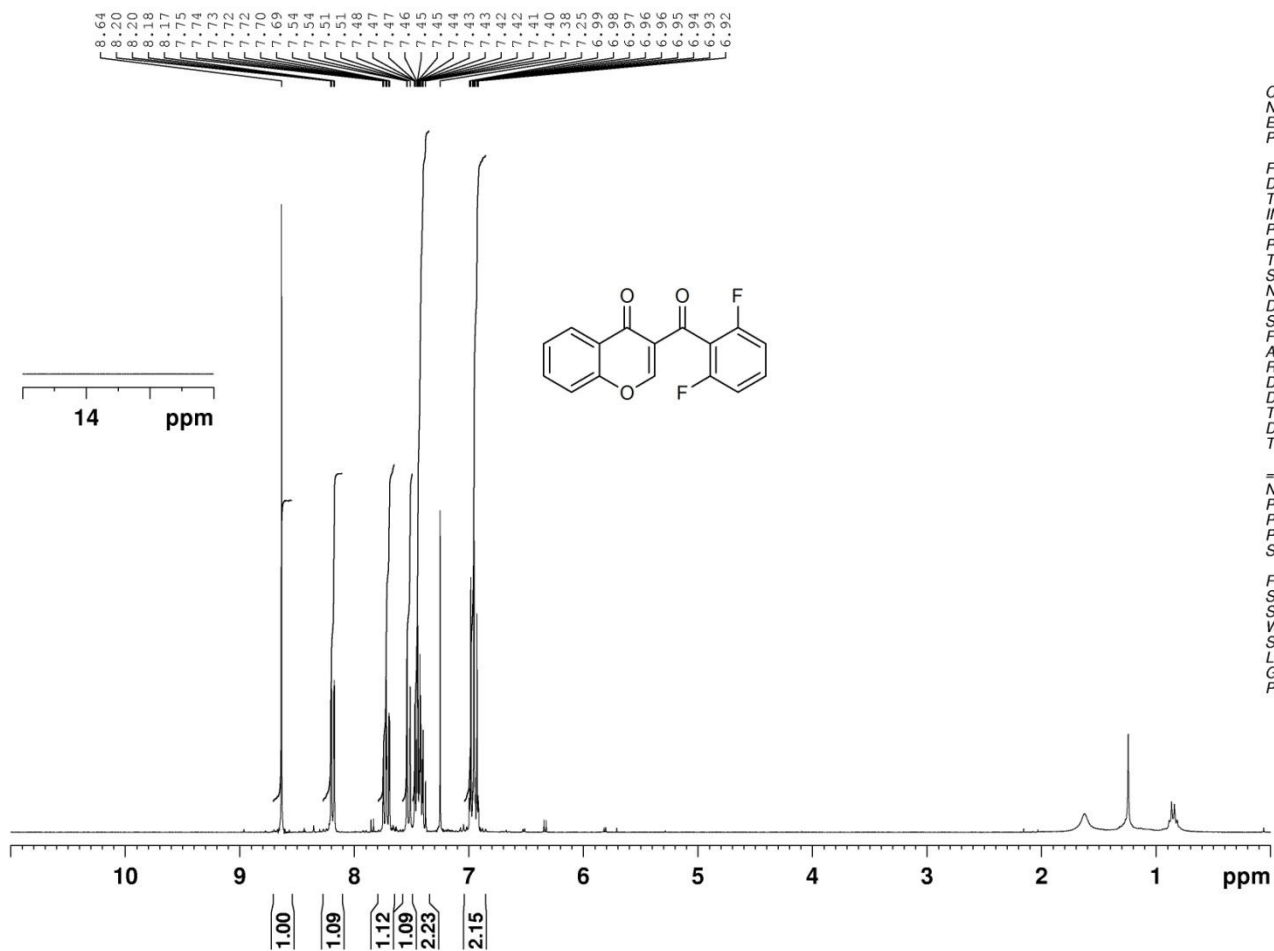

Current Data Parameters  
 NAME 130717.u330 sn  
 EXPNO 10  
 PROCNO 1

F2 - Acquisition Parameters  
 Date\_ 20130717  
 Time 15.46  
 INSTRUM spect  
 PROBHD 5 mm PABBO  
 PULPROG zg30  
 TD 65536  
 SOLVENT CDCl3  
 NS 16  
 DS 2  
 SWH 6188.119 Hz  
 FIDRES 0.094423 Hz  
 AQ 5.2953587 sec  
 RG 256  
 DW 80.800 usec  
 DE 10.00 usec  
 TE 298.2 K  
 D1 1.00000000 sec  
 TD0 1

===== CHANNEL f1 :  
 NUC1 1H  
 P1 10.00 usec  
 PL1 0 dB  
 PL1W 11.25325108 Hz  
 SFO1 300.1318534 MHz

F2 - Processing parameters  
 SI 32768  
 SF 300.1300137 MHz  
 WDW EM  
 SSB 0  
 LB 0.30 Hz  
 GB 0  
 PC 1.00

# Compound 3k

Mkrtchyan SM815 13C CDC13

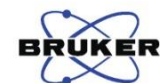

185.07  
174.17  
162.14  
162.03  
161.59  
158.12  
158.01  
155.91  
134.51  
132.58  
132.41  
132.24  
126.42  
125.10  
123.76  
118.33  
111.90  
111.86  
111.53  
111.50

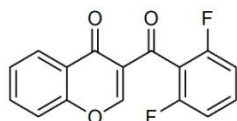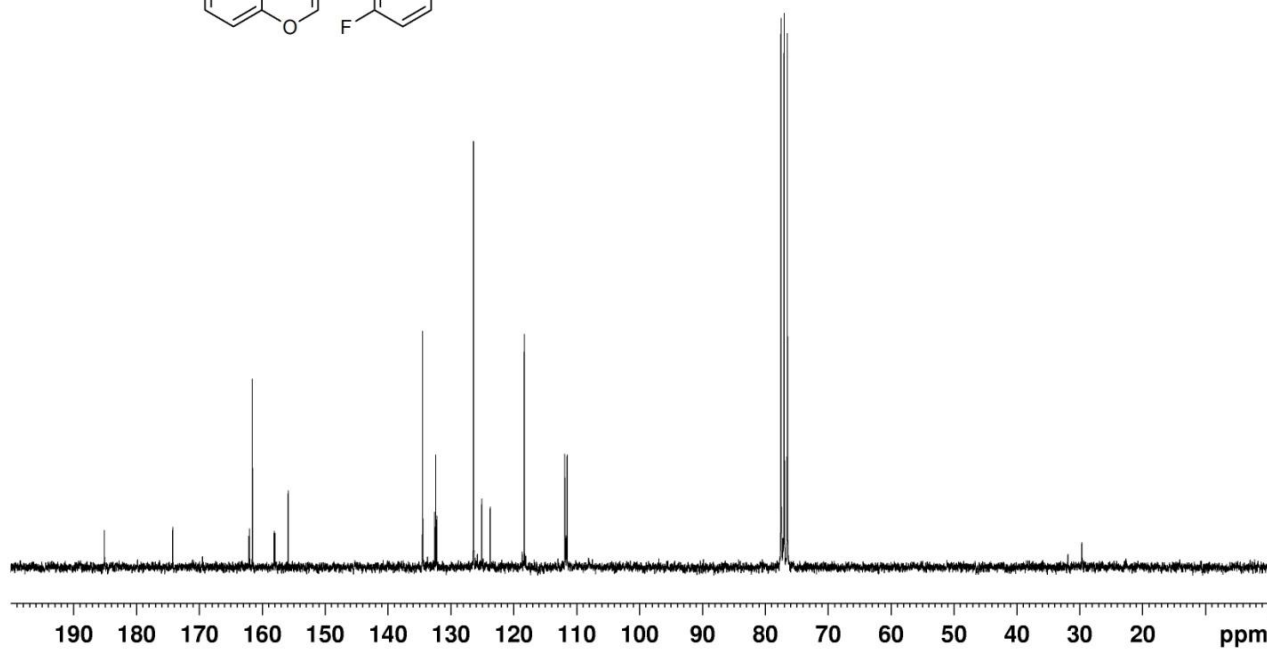

Current Data Parameters  
NAME 130718.207 sr  
EXPNO 10  
PROCNO 1

F2 - Acquisition Parame  
Date 20130718  
Time 22.09  
INSTRUM spect  
PROBHD 5 mm PABBC  
PULPROG zgpg30  
TD 65536  
SOLVENT CDC13  
NS 1024  
DS 4  
SWH 15000.000 Hz  
FIDRES 0.228882 Hz  
AQ 2.1845834 sec  
RG 2050  
DW 33.333 usec  
DE 10.00 usec  
TE 298.1 K  
D1 2.0000000 sec  
d11 0.03000000 sec  
DELTA 1.89999998  
TD0 1

=====  
CHANNEL f1  
NUC1 13C  
P1 10.00 usec  
PL1 -1.00 dB  
SFO1 62.9015280 MHz

=====  
CHANNEL f2  
CPDPRG2 waltz16  
NUC2 1H  
PCPD2 70.00 usec  
PL12 15.00 dB  
PL13 15.00 dB  
PL2 -2.50 dB  
SFO2 250.1310005 MHz

F2 - Processing parame  
SI 32768  
SF 62.8952402 MHz  
WDW EM  
SSB 0  
LB 1.00 Hz  
GB 0  
PC 1.40

# Compound 4a

Mkrtchyan SM395 1H DMSO

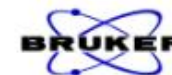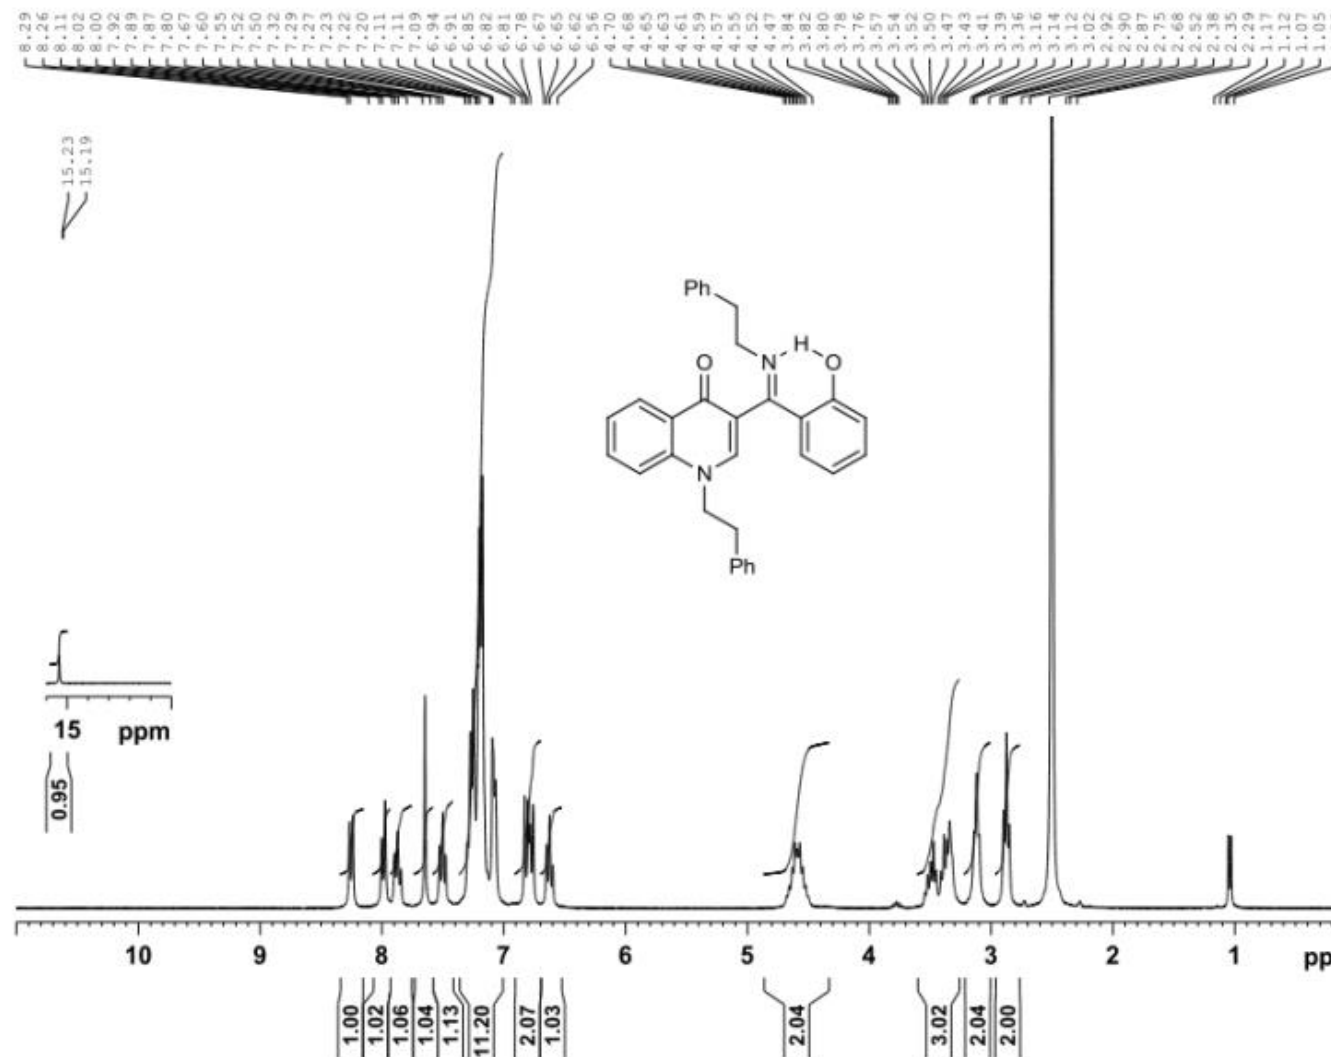

Current Data Parameters  
 NAME 110208.u334 sm 395  
 EXPNO 11  
 PROCNO 1

F2 - Acquisition Parameters  
 Date\_ 20110208  
 Time 15.26  
 INSTRUM spect  
 PROBHD 5 mm PABBO BB-  
 PULPROG zg30  
 TD 65536  
 SOLVENT DMSO  
 NS 16  
 DS 2  
 SWH 6188.119 Hz  
 FIDRES 0.094423 Hz  
 AQ 5.2953587 sec  
 RG 114  
 DW 80.800 usec  
 DE 10.00 usec  
 TE 298.2 K  
 D1 1.0000000 sec  
 TD0 1

===== CHANNEL f1 =====  
 NUC1 1H  
 P1 10.00 usec  
 PL1 0.00 dB  
 PL1W 11.25325108 W  
 SFO1 300.1318534 MHz

F2 - Processing parameters  
 SI 32768  
 SF 300.1300071 MHz  
 WDW EM  
 SSB 0  
 LB 0.30 Hz  
 GB 0  
 PC 1.00

# Compound 4a

Mkrtchyan SM395 13C DMSO

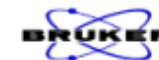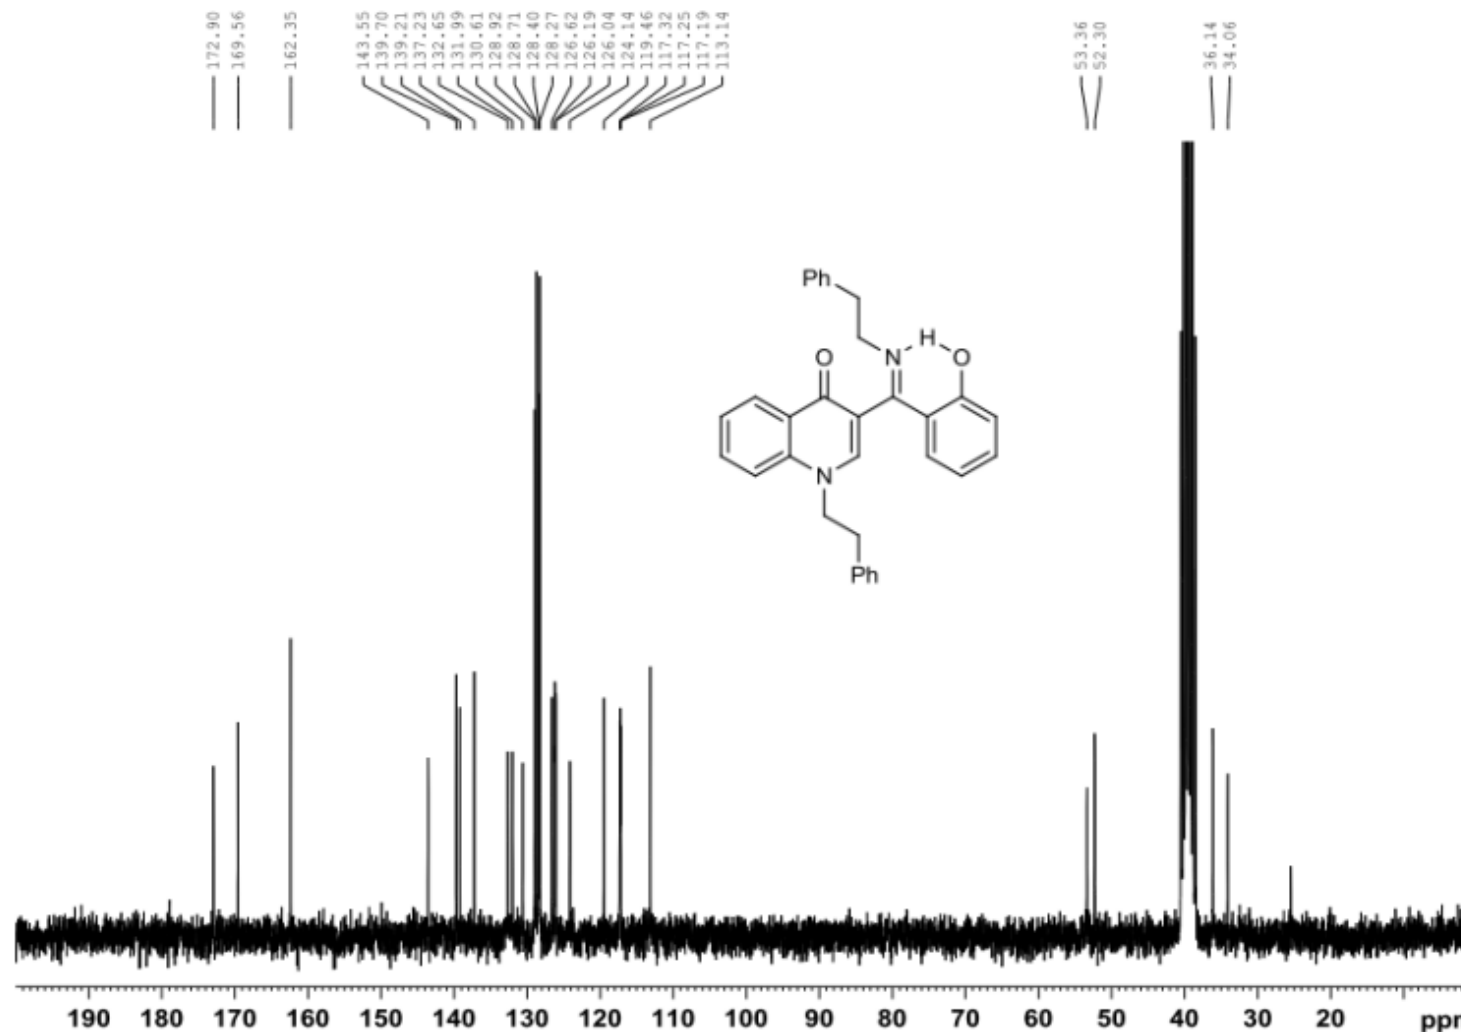

Current Data Parameters  
 NAME 110210.204 sm 395 C  
 EXPNO 10  
 PROCNO 1

F2 - Acquisition Parameters  
 Date\_ 20110210  
 Time 17.32  
 INSTRUM spect  
 PROBHD 5 mm PABBO BB-  
 PULPROG zgpg30  
 TD 65536  
 SOLVENT DMSO  
 NS 1024  
 DS 4  
 SWH 15000.000 Hz  
 FIDRES 0.228882 Hz  
 AQ 2.1845834 sec  
 RG 2050  
 DW 33.333 usec  
 DE 10.00 usec  
 TE 300.0 K  
 D1 2.0000000 sec  
 d11 0.0300000 sec  
 DELTA 1.89999998 sec  
 TD0 1

===== CHANNEL f1 =====  
 NUC1 13C  
 P1 10.00 usec  
 PL1 -1.00 dB  
 SFO1 62.9015280 MHz

===== CHANNEL f2 =====  
 CPDPRG2 waltz16  
 NUC2 1H  
 PCPD2 70.00 usec  
 PL12 15.00 dB  
 PL13 15.00 dB  
 PL2 -2.50 dB  
 SFO2 250.1310005 MHz

F2 - Processing parameters  
 SI 32768  
 SF 62.8952696 MHz  
 WDW EM  
 SSB 0  
 LB 1.00 Hz  
 GB 0  
 PC 1.40

# Compound 4a

Mkrtchyan SM395 Dept DMSO

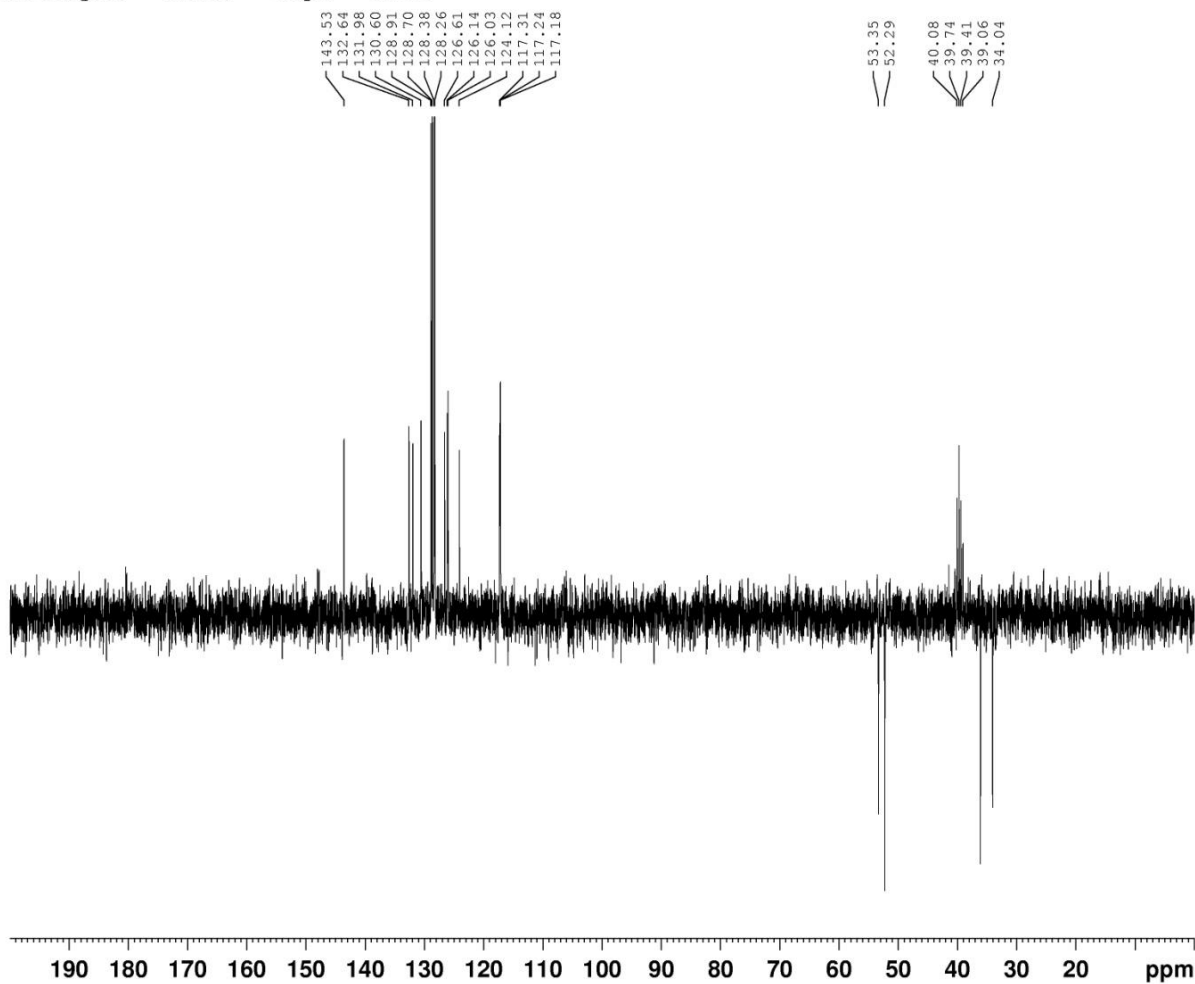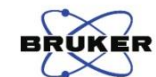

Current Data Parameters  
 NAME 4a 110210.204  
 EXPNO 11  
 PROCNO 1

F2 - Acquisition Parameters  
 Date\_ 20110210  
 Time 17.52  
 INSTRUM spect  
 PROBHD 5 mm PABBO BB-  
 PULPROG dept135  
 TD 65536  
 SOLVENT DMSO  
 NS 256  
 DS 4  
 SWH 15000.000 Hz  
 FIDRES 0.228882 Hz  
 AQ 2.1845834 sec  
 RG 1290  
 DW 33.333 usec  
 DE 10.00 usec  
 TE 298.0 K  
 CNST2 145.0000000  
 D1 2.00000000 sec  
 d12 0.0002000 sec  
 d2 0.00344828 sec  
 DELTA 0.0001273 sec  
 TD0 1

===== CHANNEL f1 =====  
 NUC1 13C  
 P1 10.00 usec  
 p2 20.00 usec  
 PL1 -1.00 dB  
 SFO1 62.9015280 MHz

===== CHANNEL f2 =====  
 CPDPRG2 waltz16  
 NUC2 1H  
 P3 10.00 usec  
 p4 20.00 usec  
 PCPD2 70.00 usec  
 PL12 15.00 dB  
 PL2 -2.50 dB  
 SFO2 250.1310005 MHz

F2 - Processing parameters  
 SI 32768  
 SF 62.8952704 MHz  
 WDW EM  
 SSB 0  
 LB 1.00 Hz  
 GB 0  
 PC 1.40

# Compound 4b

Mkrtchyan R-406-1 1H DMSO

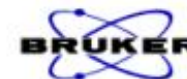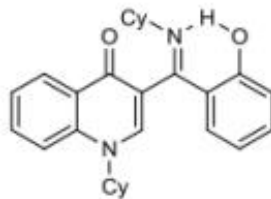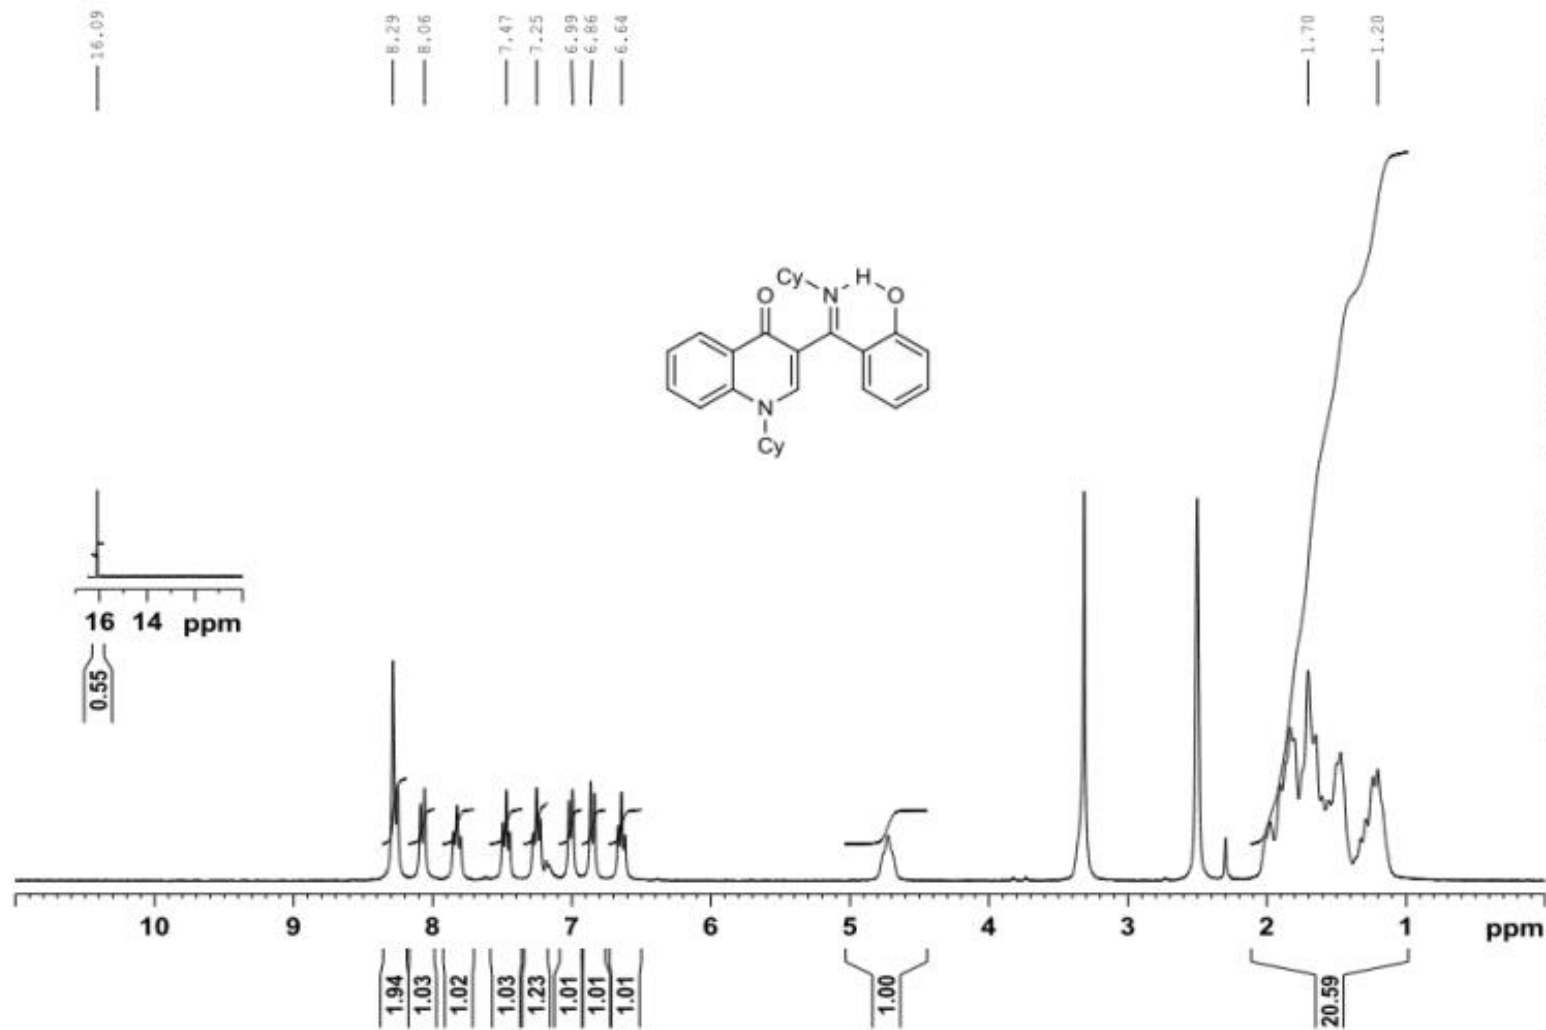

Current Data Parameters  
 NAME 110307.u332 sm 406  
 EXPNO 10  
 PROCNO 1

F2 - Acquisition Parameters  
 Date\_ 20110307  
 Time 14.13  
 INSTRUM spect  
 PROBHD 5 mm PABBO BB-  
 PULPROG zg30  
 TD 65536  
 SOLVENT DMSO  
 NS 16  
 DS 2  
 SWH 6188.119 Hz  
 FIDRES 0.094423 Hz  
 AQ 5.2953587 sec  
 RG 181  
 DW 80.800 usec  
 DE 10.00 usec  
 TE 298.2 K  
 D1 1.00000000 sec  
 TD0 1

----- CHANNEL f1 -----  
 NUC1 1H  
 P1 10.00 usec  
 PL1 0.00 dB  
 PL1W 11.25325108 W  
 SFO1 300.1318534 MHz

F2 - Processing parameters  
 SI 32768  
 SF 300.1300074 MHz  
 WDW EM  
 SSB 0  
 LB 0.30 Hz  
 GB 0  
 PC 1.00

# Compound 4b

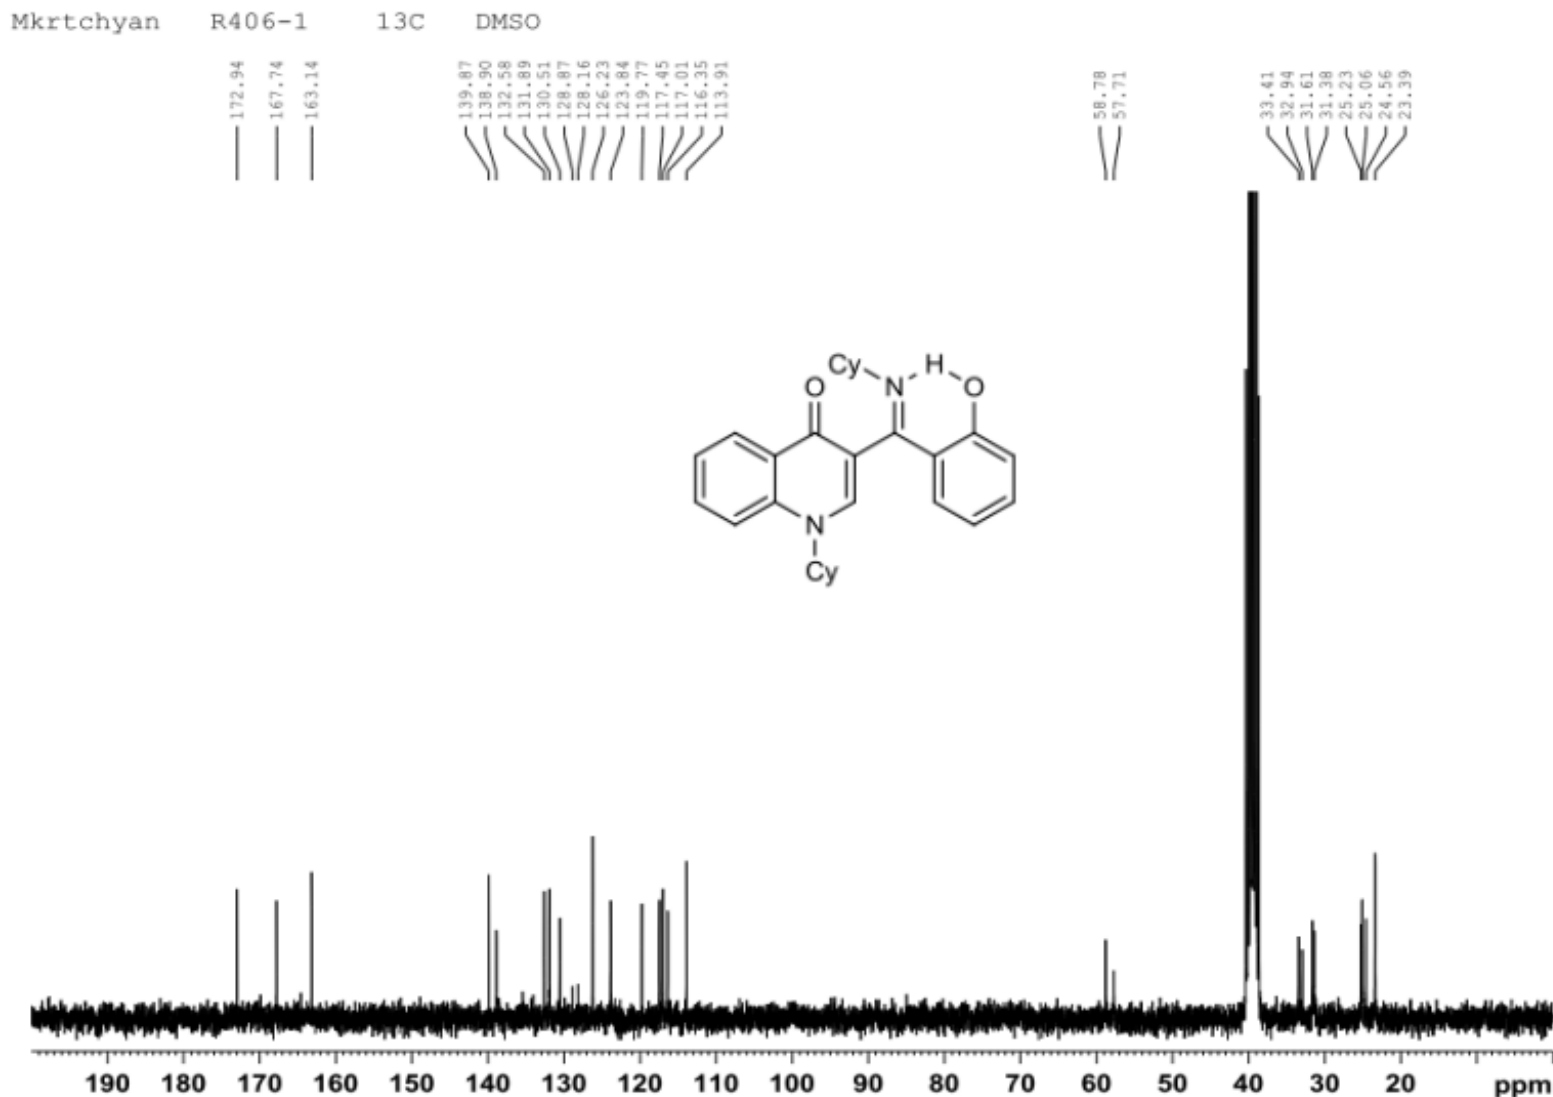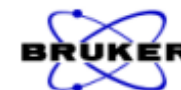

Current Data Parameters  
 NAME 110309.u315 sm 406 C  
 EXPNO 10  
 PROCNO 1

F2 - Acquisition Parameters  
 Date\_ 20110309  
 Time 18.51  
 INSTRUM spect  
 PROBHD 5 mm PABBO BB-  
 PULPROG zgpg30  
 TD 65536  
 SOLVENT CDCl3  
 NS 1280  
 DS 4  
 SWH 18028.846 Hz  
 FIDRES 0.275098 Hz  
 AQ 1.8175818 sec  
 RG 2050  
 DW 27.733 usec  
 DE 10.00 usec  
 TE 298.2 K  
 D1 2.0000000 sec  
 D11 0.03000000 sec  
 TDO 1

===== CHANNEL f1 =====  
 NUC1 13C  
 P1 10.00 usec  
 PL1 -0.50 dB  
 PL1W 33.25691986 W  
 SFO1 75.4752953 MHz

===== CHANNEL f2 =====  
 CPDPRG2 waltz16  
 NUC2 1H  
 PCPD2 72.00 usec  
 PL2 0.00 dB  
 PL12 17.00 dB  
 PL13 17.00 dB  
 PL2W 11.25325108 W  
 PL12W 0.22453187 W  
 PL13W 0.22453187 W  
 SFO2 300.1312005 MHz

F2 - Processing parameters  
 SI 32768  
 SF 75.4681463 MHz  
 WDW EM  
 SSB 0  
 LB 1.00 Hz  
 GB 0  
 PC 1.40



# Compound 4c

Mkrtchyan SM-412-R 1H CDC13

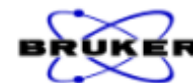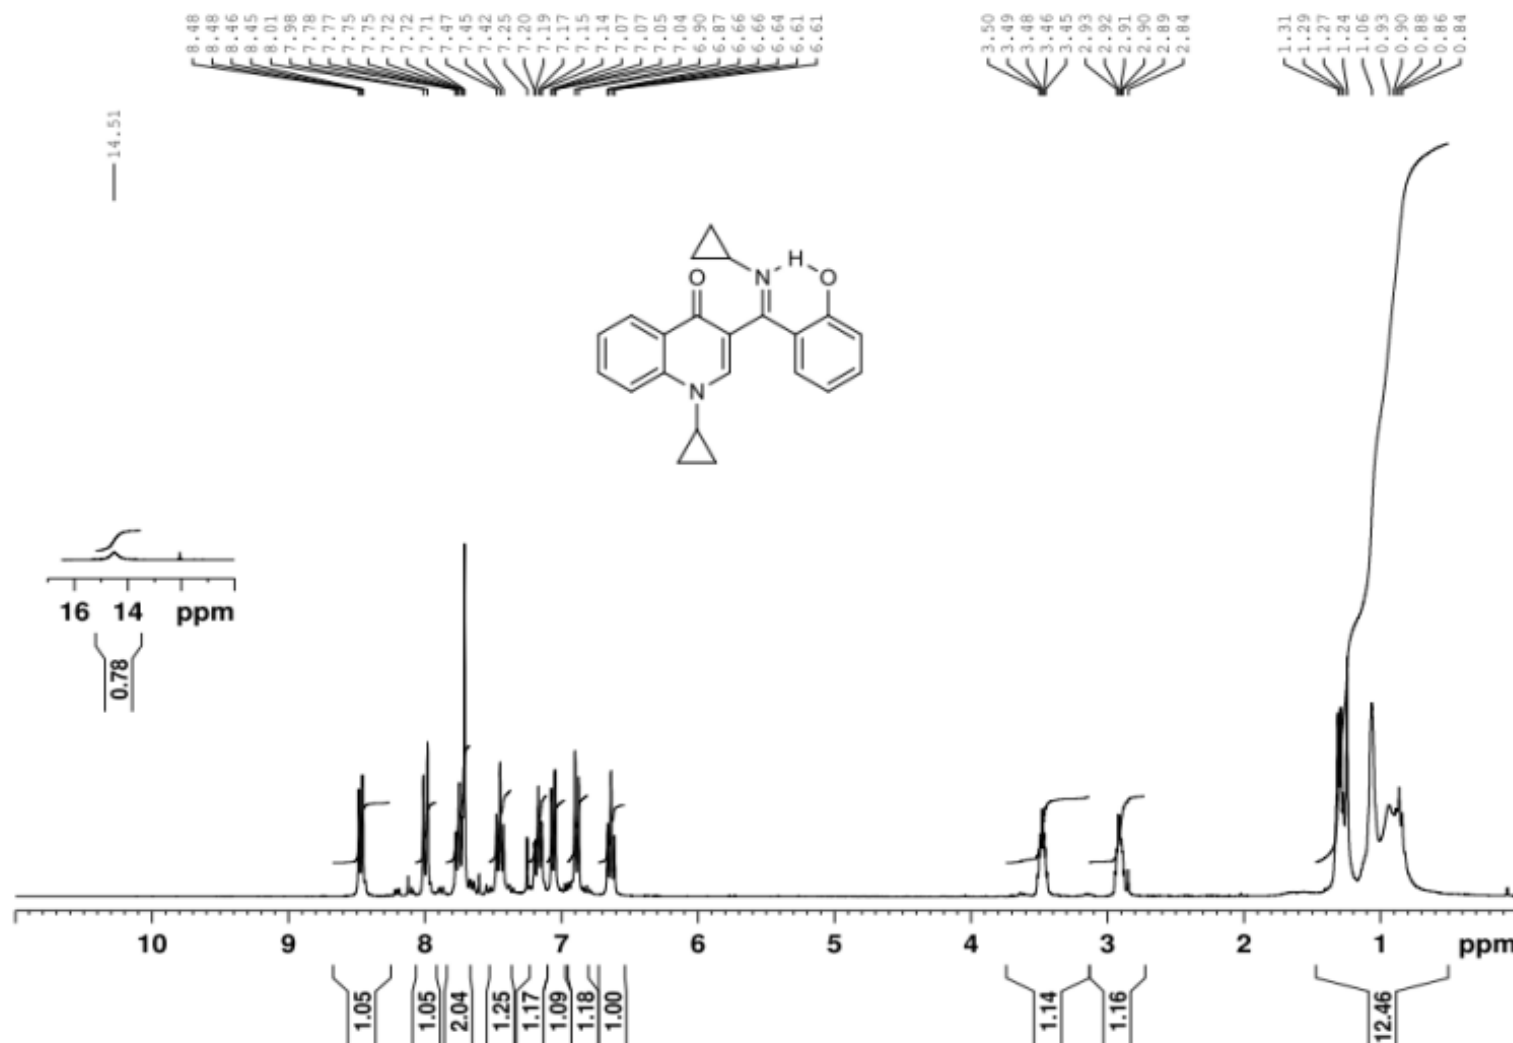

Current Data Parameters  
 NAME 110307.u333.sm  
 EXPNO 10  
 PROCNO 1

F2 - Acquisition Parameters  
 Date\_ 20110307  
 Time 14.19  
 INSTRUM spect  
 PROBHD 5 mm PABBO  
 PULPROG zg30  
 TD 65536  
 SOLVENT CDCl3  
 NS 16  
 DS 2  
 SWH 6188.119 Hz  
 FIDRES 0.094423 Hz  
 AQ 5.2953587 sec  
 RG 50.8  
 DW 80.800 usec  
 DE 10.00 usec  
 TE 298.2 K  
 D1 1.0000000 sec  
 TD0 1

----- CHANNEL f1 -----  
 NUC1 1H  
 P1 10.00 usec  
 PL1 0 dB  
 PL1W 11.25325108 V  
 SFO1 300.1318534 M

F2 - Processing parameters  
 SI 32768  
 SF 300.1300118 MHz  
 WDW EM  
 SSB 0  
 LB 0.30 Hz  
 GB 0  
 PC 1.00

# Compound 4c

Mkrtchyan SM-412-R 13C DMSO

173.39  
167.60  
161.00  
142.84  
141.34  
132.37  
131.30  
130.30  
125.90  
125.82  
124.12  
120.17  
117.75  
117.40  
116.82  
114.30

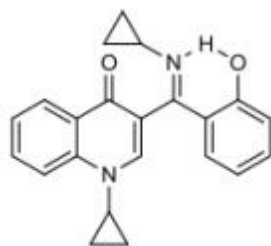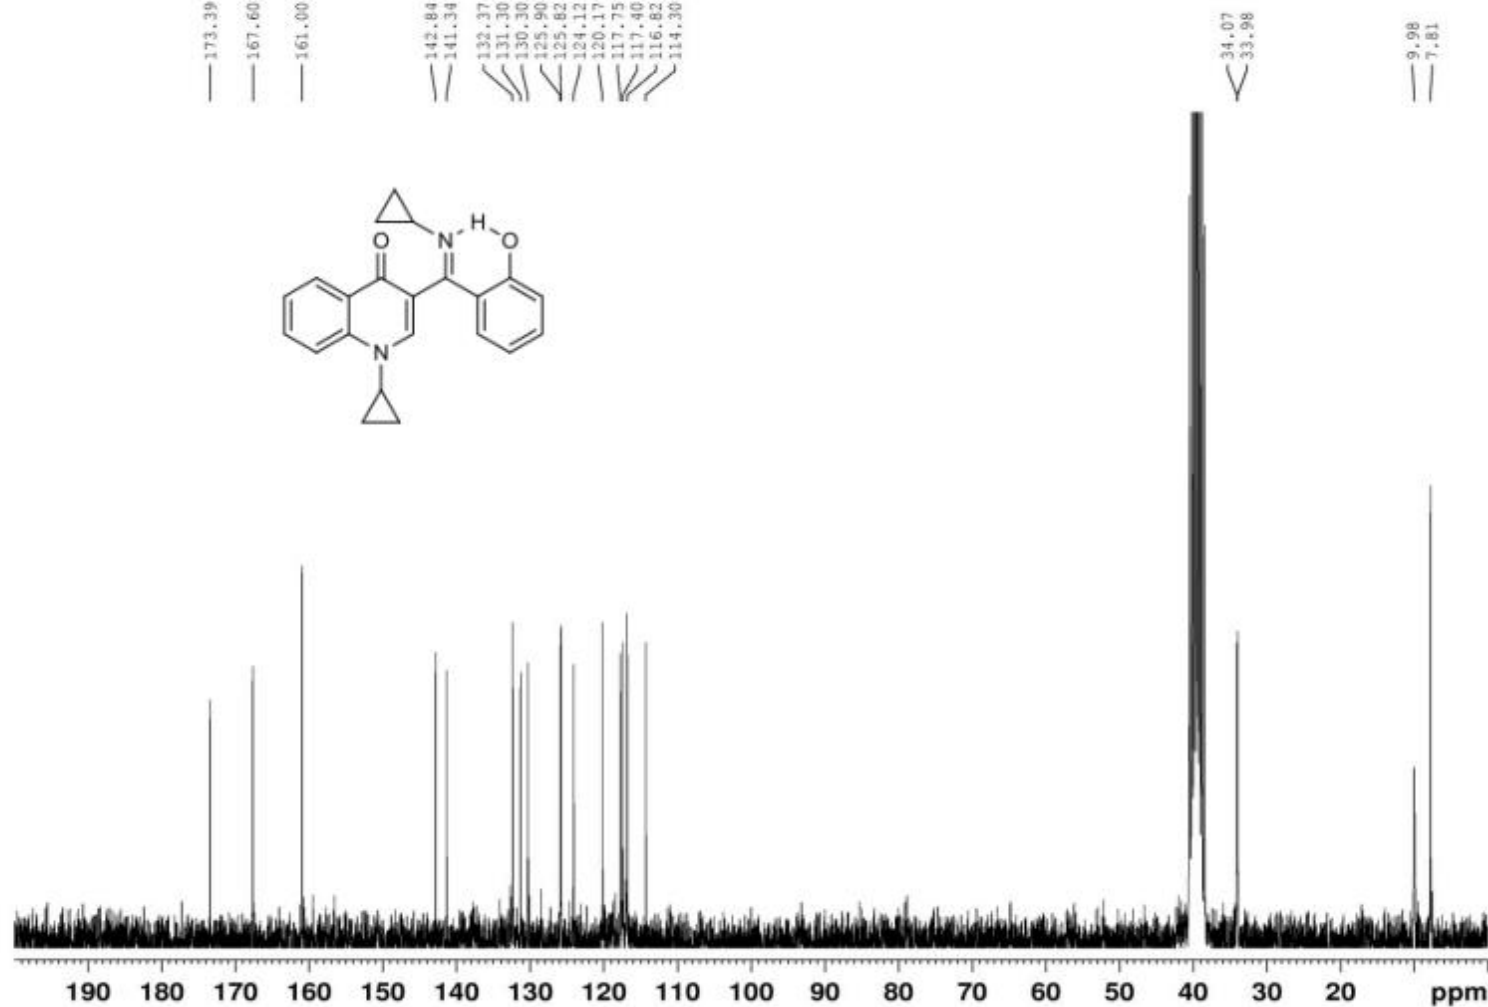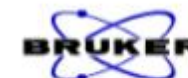

Current Data Parameter  
NAME 130902.209 sn  
EXPNO 10  
PROCNO 1

F2 - Acquisition Parameter  
Date 20130902  
Time 23.45  
INSTRUM spect  
PROBHD 5 mm QNP 1  
PULPROG zgpg30  
TD 65536  
SOLVENT DMSC  
NS 1024  
DS 4  
SWH 15000.000 Hz  
FIDRES 0.226882 Hz  
AQ 2.1845834 sec  
RG 2050  
DW 33.333 usec  
DE 10.00 usec  
TE 298.1 K  
D1 2.00000000 sec  
d11 0.03000000 sec  
DELTA 1.89999998  
TD0 1

===== CHANNEL f1  
NUC1 13C  
P1 10.20 usec  
PL1 0 dB  
SFO1 62.9015280 MHz

===== CHANNEL f2  
CPDPRG2 waltz16  
NUC2 1H  
PCPD2 70.00 usec  
PL12 14.00 dB  
PL13 14.00 dB  
PL2 -3.00 dB  
SFO2 250.1310005 MHz

F2 - Processing parameter  
SI 32768  
SF 62.8952682 MHz  
WDW EM  
SSB 0  
LB 1.00 Hz  
GB 0  
PC 1.40

# Compound 4d

Mkrtchyan SM784 1H CDC13

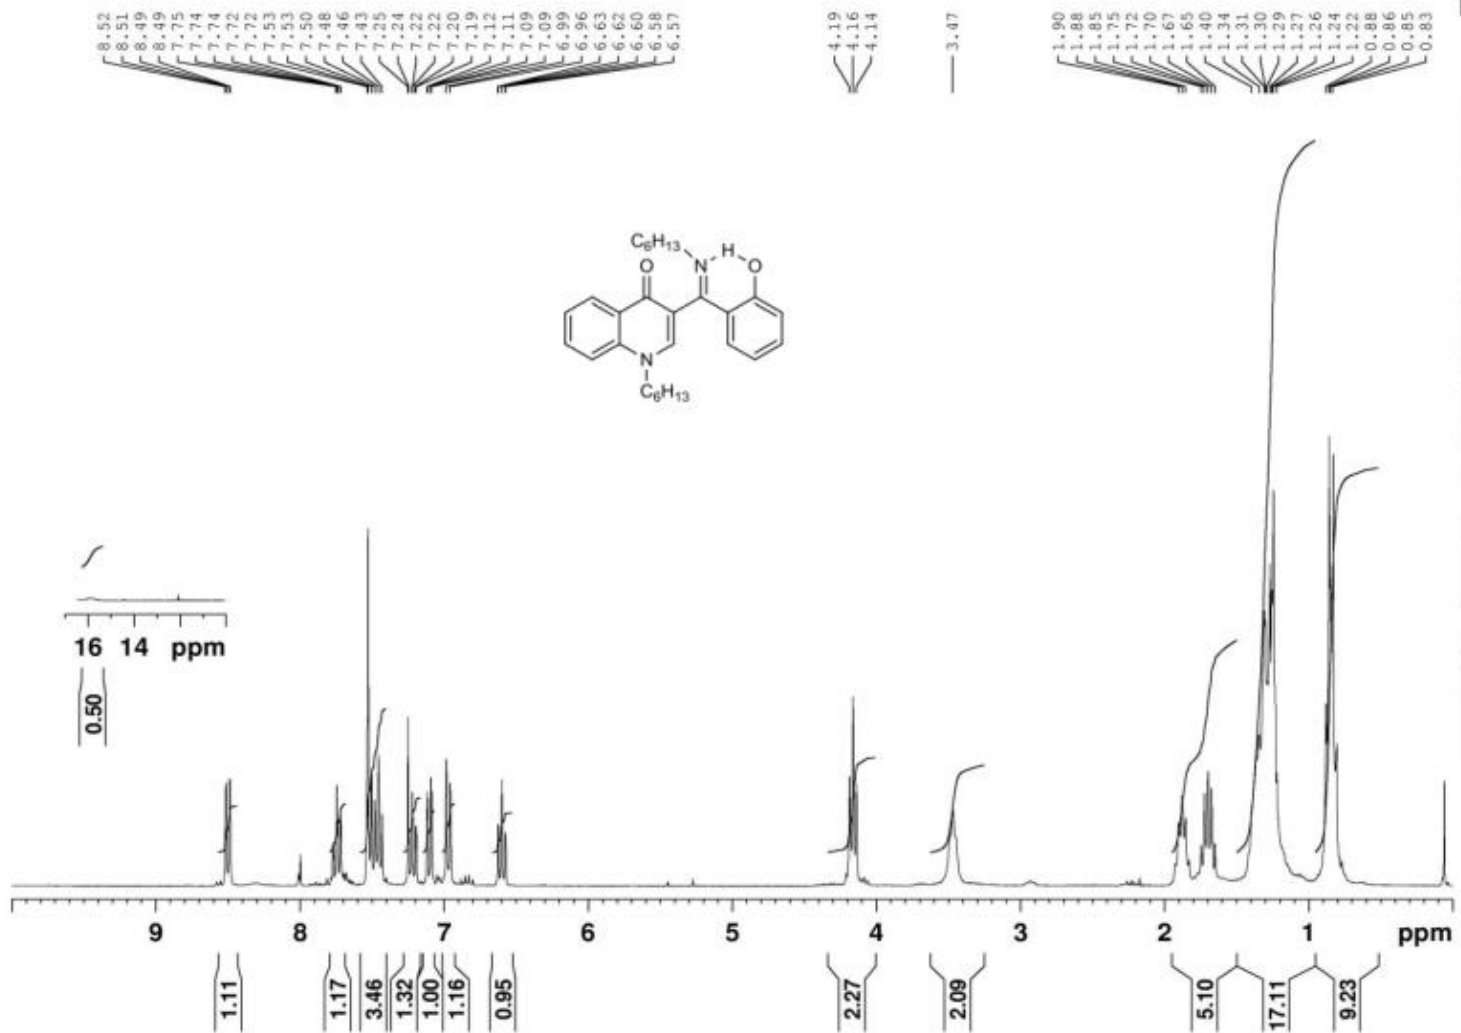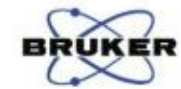

Current Data Parameters  
 NAME 130523.u301  
 EXPNO 10  
 PROCNO 1

F2 - Acquisition Parameters  
 Date\_ 20130523  
 Time 8.56  
 INSTRUM spect  
 PROBHD 5 mm PABP  
 PULPROG zg30  
 TD 65536  
 SOLVENT CDCl3  
 NS 16  
 DS 2  
 SWH 6188.119 Hz  
 FIDRES 0.094423  
 AQ 5.2953587 s  
 RG 50.8  
 DW 80.800 usec  
 DE 10.00 usec  
 TE 298.2 K  
 D1 1.0000000 s  
 TD0 1

===== CHANNEL f1  
 NUC1 1H  
 P1 10.00 usec  
 PL1 0 dB  
 PL1W 11.2532510 kHz  
 SFO1 300.1318534 MHz

F2 - Processing parameters  
 SI 32768  
 SF 300.1300131 MHz  
 WDW EM  
 SSB 0  
 LB 0.30 Hz  
 GB 0  
 PC 1.00

# Compound 4d

Mkrtchyan SM784 13C CDC13

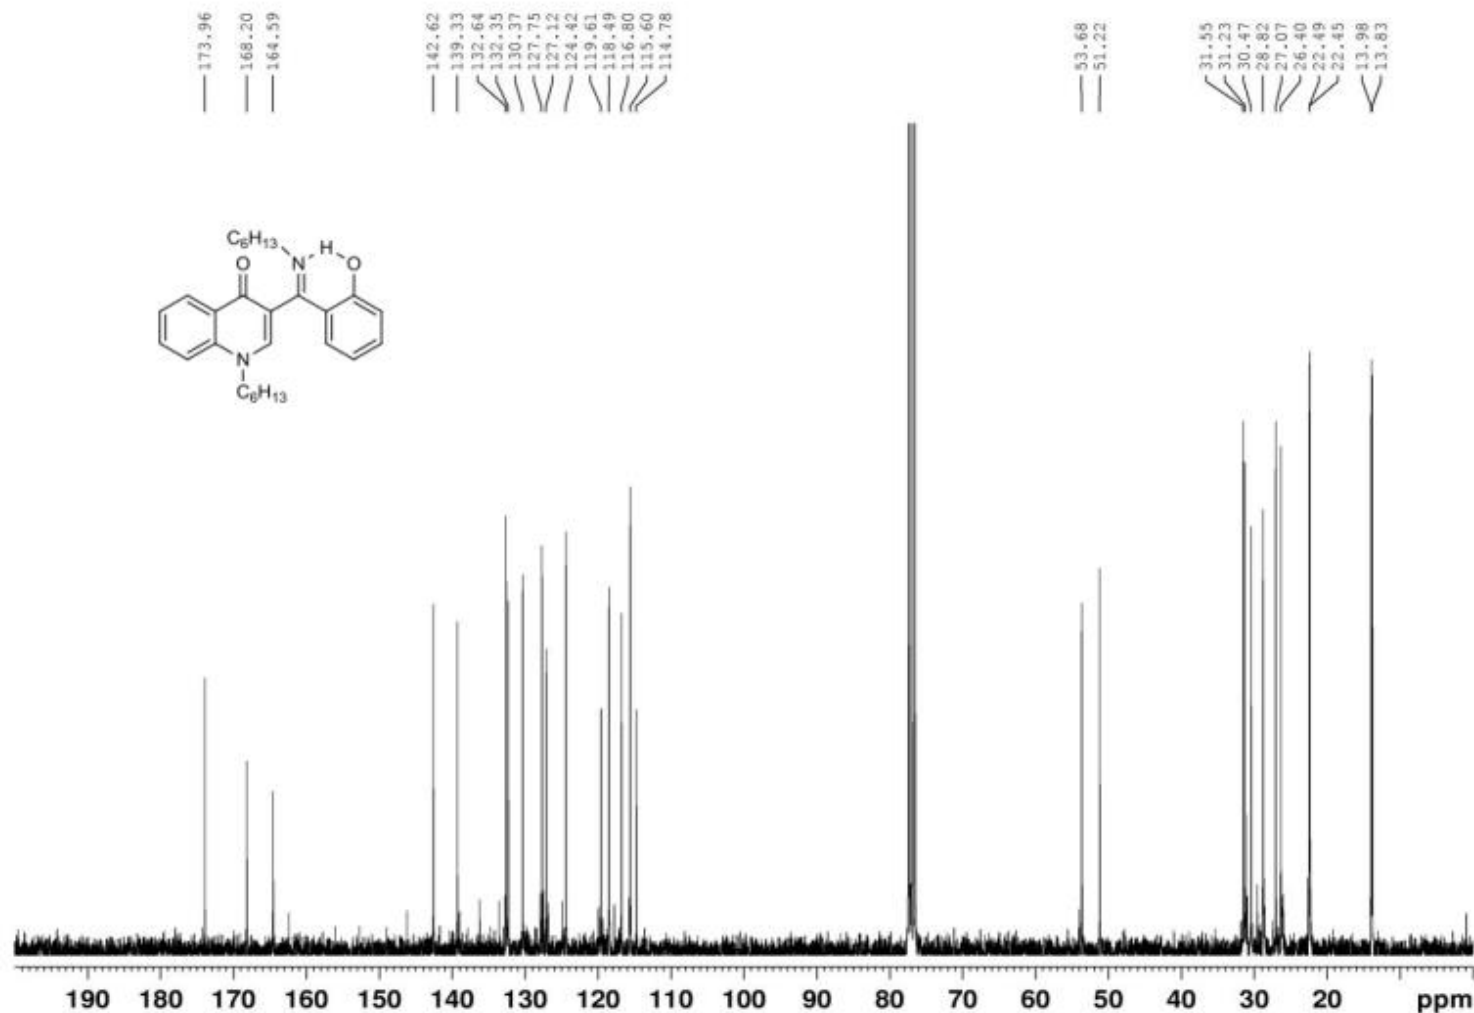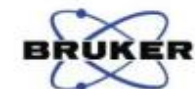

Current Data Parameter  
 NAME 130523.u301  
 EXPNO 12  
 PROCNO 1

F2 - Acquisition Param  
 Date 20130523  
 Time 18.56  
 INSTRUM spect  
 PROBHD 5 mm PABB  
 PULPROG zgpg3t  
 TD 65536  
 SOLVENT CDCl3  
 NS 800  
 DS 4  
 SWH 18028.846 i  
 FIDRES 0.275098  
 AQ 1.8175818 s  
 RG 2050  
 DW 27.733 usec  
 DE 10.00 usec  
 TE 298.2 K  
 D1 2.00000000 s  
 D11 0.03000000 s  
 TD0 1

----- CHANNEL f1  
 NUC1 13C  
 P1 10.00 usec  
 PL1 -0.50 dB  
 PL1W 33.2569198  
 SFO1 75.4752953

----- CHANNEL f2  
 CPDPRG2 waltz16  
 NUC2 1H  
 PCPD2 72.00 us  
 PL2 0 dB  
 PL12 17.00 dB  
 PL13 17.00 dB  
 PL2W 11.2532510  
 PL12W 0.22453187  
 PL13W 0.22453187  
 SFO2 300.1312005

F2 - Processing param  
 SI 32768  
 SF 75.4677542 M  
 WDW EM  
 SSB 0  
 LB 1.00 Hz  
 GB 0  
 PC 1.40

# Compound 4e

Mkrtchyan SM-791-3-1 1H CDC13

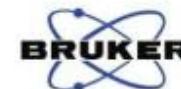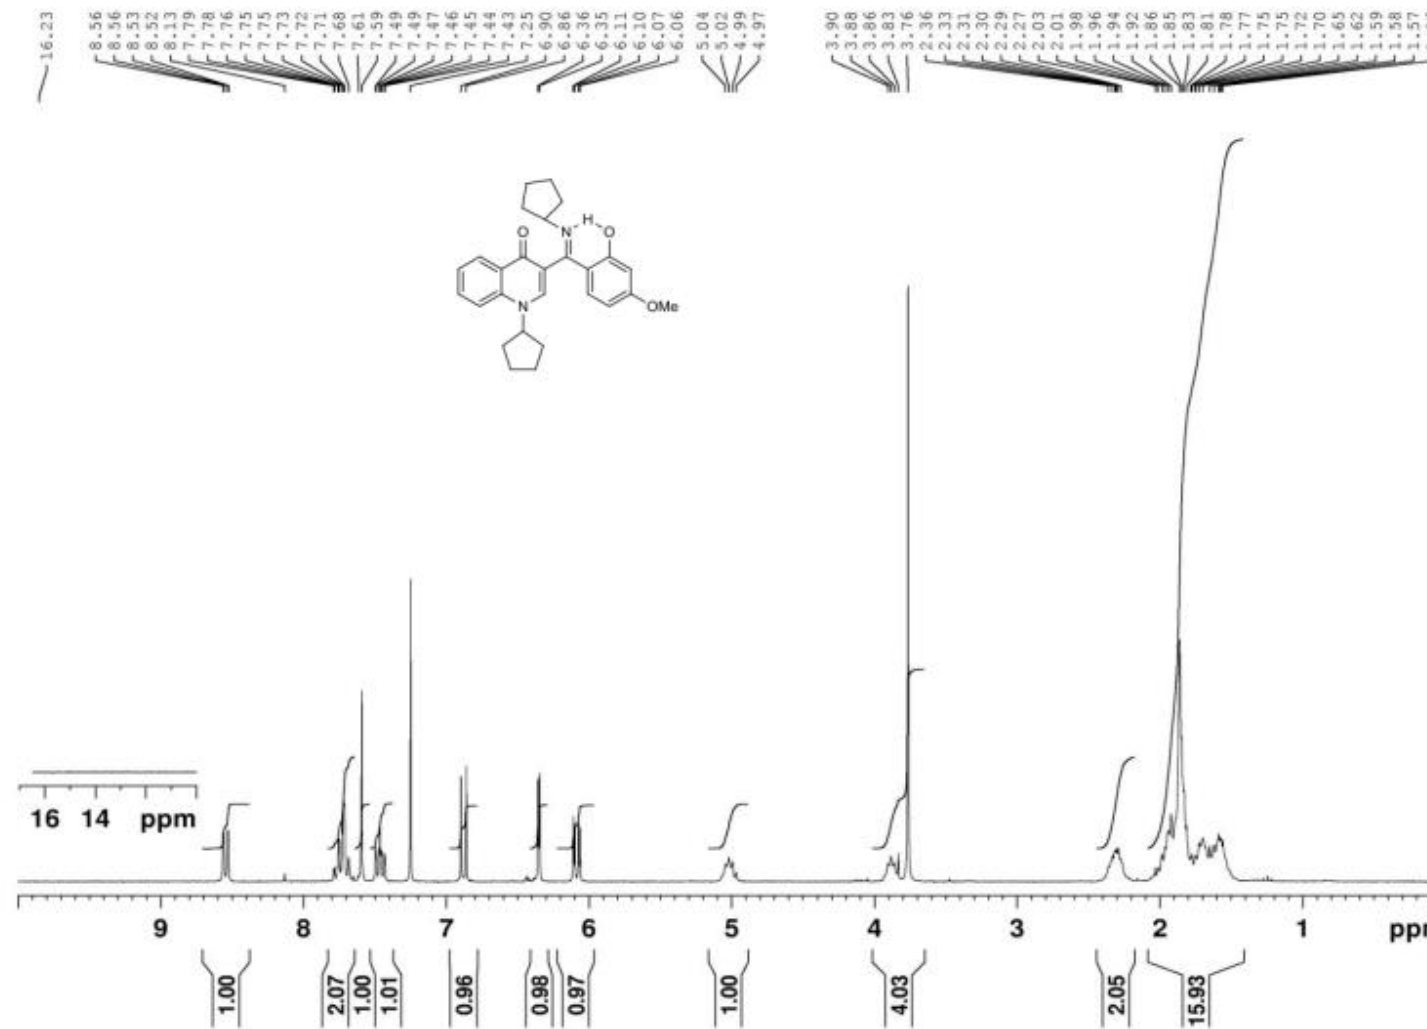

Current Data Parameter:  
 NAME 130621.201 sn  
 EXPNO 10  
 PROCNO 1

F2 - Acquisition Parame  
 Date 20130621  
 Time 8.36  
 INSTRUM spect  
 PROBHD 5 mm PABBi  
 PULPROG zg30  
 TD 65536  
 SOLVENT CDCl3  
 NS 16  
 DS 2  
 SWH 5165.289 H  
 FIDRES 0.078816  
 AQ 6.3439350 se  
 RG 645  
 DW 96.800 usec  
 DE 10.00 usec  
 TE 298.1 K  
 D1 1.00000000 se  
 TD0 1

==== CHANNEL f1  
 NUC1 1H  
 P1 10.00 usec  
 PL1 -2.50 dB  
 SFO1 250.1315447

F2 - Processing parame  
 SI 32768  
 SF 250.1300030 M  
 WDW EM  
 SSB 0  
 LB 0.30 Hz  
 GB 0  
 PC 1.00

# Compound 4e

Mkrtchyan SM791-3-1 13C CDC13

173.83  
171.58  
166.39  
164.24

140.40  
138.06  
132.60  
131.79  
127.88  
127.32  
124.40  
115.60  
114.56  
112.55  
105.45  
102.27

61.01  
60.18  
55.23

35.11  
34.19  
32.43  
32.38  
32.27  
24.26  
24.21  
23.79

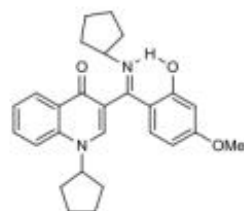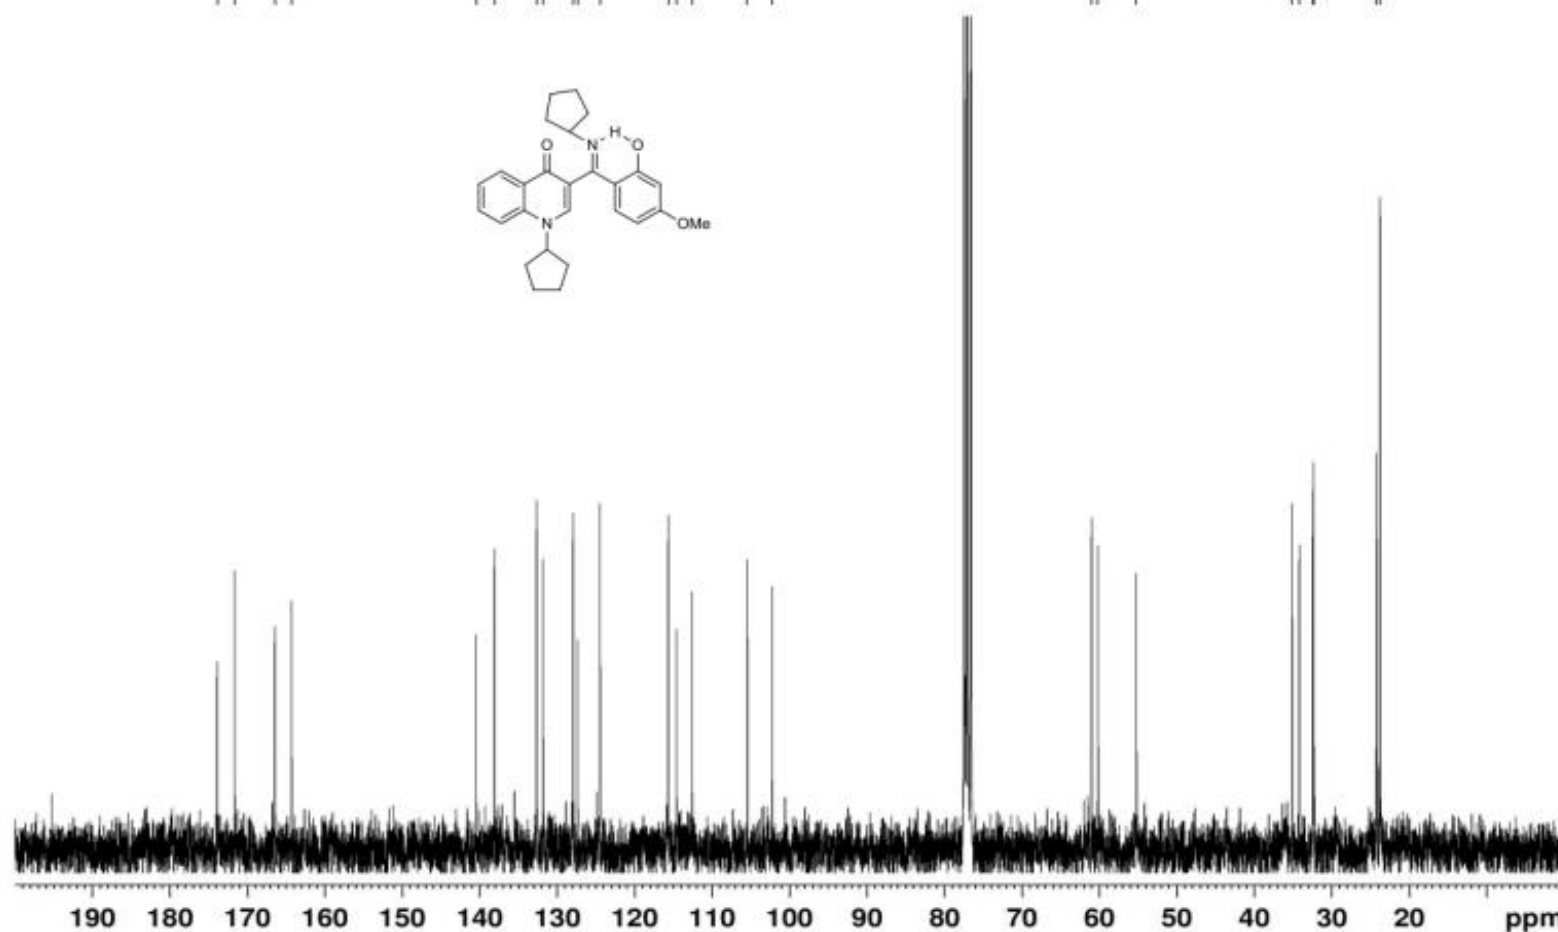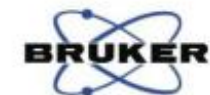

Current Data Parameters  
NAME 130621.u317  
EXPNO 10  
PROCNO 1

F2 - Acquisition Parameters  
Date\_ 20130623  
Time 7.13  
INSTRUM spect  
PROBHD 5 mm PAB1  
PULPROG zgpgc  
TD 65536  
SOLVENT CDCl  
NS 1024  
DS 4  
SWH 18028.846  
FIDRES 0.275096  
AQ 1.8175818 s  
RG 2050  
DW 27.733 us  
DE 10.00 use  
TE 299.1 K  
D1 2.00000000 s  
D11 0.03000000  
TD0 1

----- CHANNEL 1 -----  
NUC1 13C  
P1 10.00 use  
PL1 -0.50 dB  
PL1W 33.2569196  
SFO1 75.475295

----- CHANNEL 2 -----  
CPDPRG2 waltz1  
NUC2 1H  
PCPD2 72.00 u  
PL2 0 dB  
PL12 17.00 dB  
PL13 17.00 dB  
PL2W 11.2532510  
PL12W 0.2245316  
PL13W 0.2245316  
SFO2 300.131200

F2 - Processing parameters  
SI 32768  
SF 75.4677490 I  
WDW EM  
SSB 0  
LB 1.00 Hz  
GB 0  
PC 1.40

# Compound 4f

Mkrtchyan SM792-3 1H CDC13

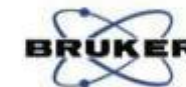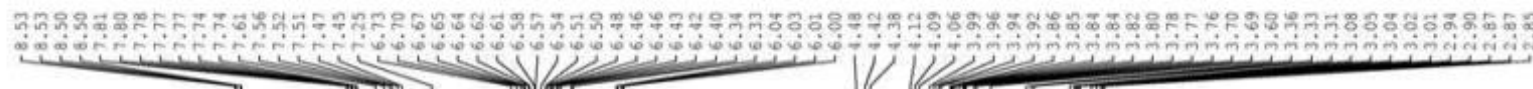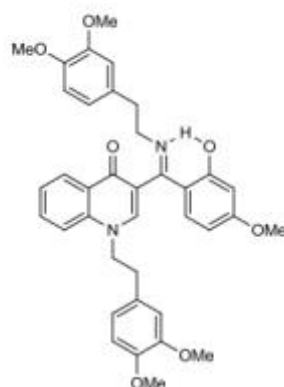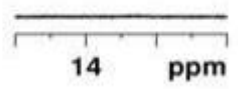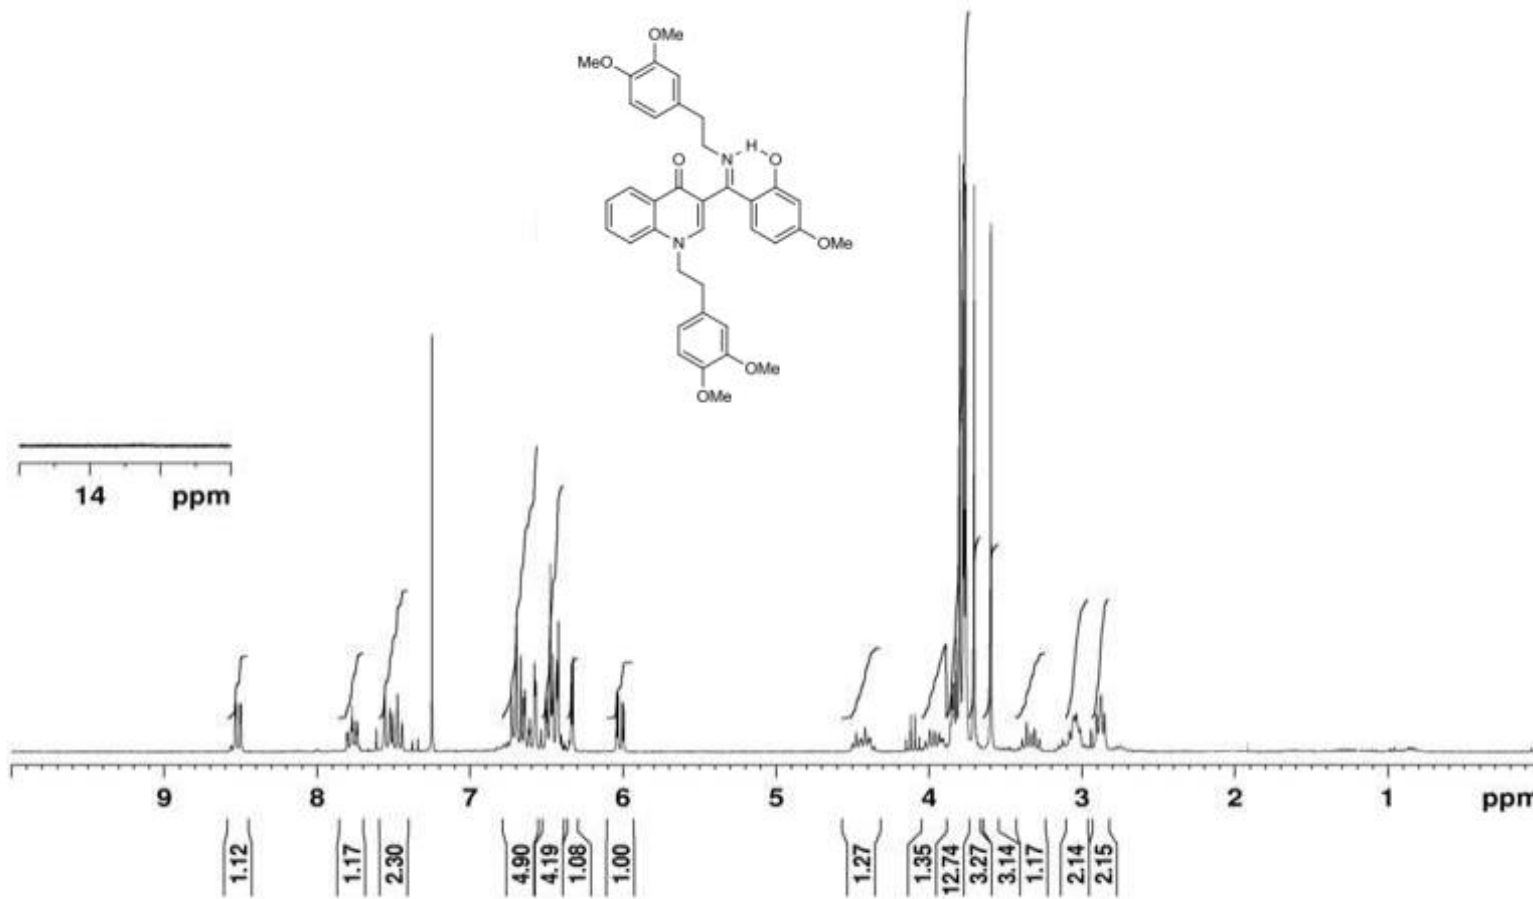

Current Data Parameters  
 NAME 130619.201 :  
 EXPNO 10  
 PROCNO 1

F2 - Acquisition Parameters  
 Date\_ 20130619  
 Time 9.56  
 INSTRUM spect  
 PROBHD 5 mm PAB  
 PULPROG zg30  
 TD 65536  
 SOLVENT CDC13  
 NS 16  
 DS 2  
 SWH 5165.289  
 FIDRES 0.078814  
 AQ 6.3439350 s  
 RG 645  
 DW 96.800 us  
 DE 10.00 us  
 TE 298.1 K  
 D1 1.00000000 s  
 TD0 1

----- CHANNEL -----  
 NUC1 1H  
 P1 10.00 use  
 PL1 -2.50 dB  
 SFO1 250.131544

F2 - Processing parameters  
 SI 32768  
 SF 250.1300030  
 WDW EM  
 SSB 0  
 LB 0.30 Hz  
 GB 0  
 PC 1.00



# Compound 4f

Mkrtchyan SM792-3 13C CDC13

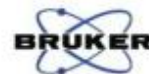

173.85  
170.97  
167.69  
164.23  
149.34  
148.74  
148.35  
147.33  
143.25  
138.97  
132.75  
132.32  
131.83  
128.55  
127.89  
127.00  
124.56  
121.09  
120.62  
115.57  
113.76  
112.42  
112.27  
111.84  
111.66  
111.20  
105.30  
102.19  
55.95  
55.84  
55.74  
55.55  
55.16  
54.80  
51.14  
36.44  
34.27

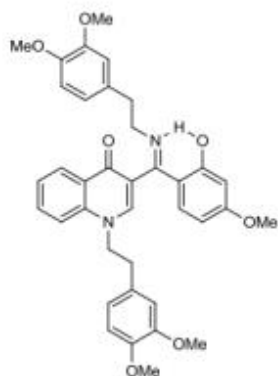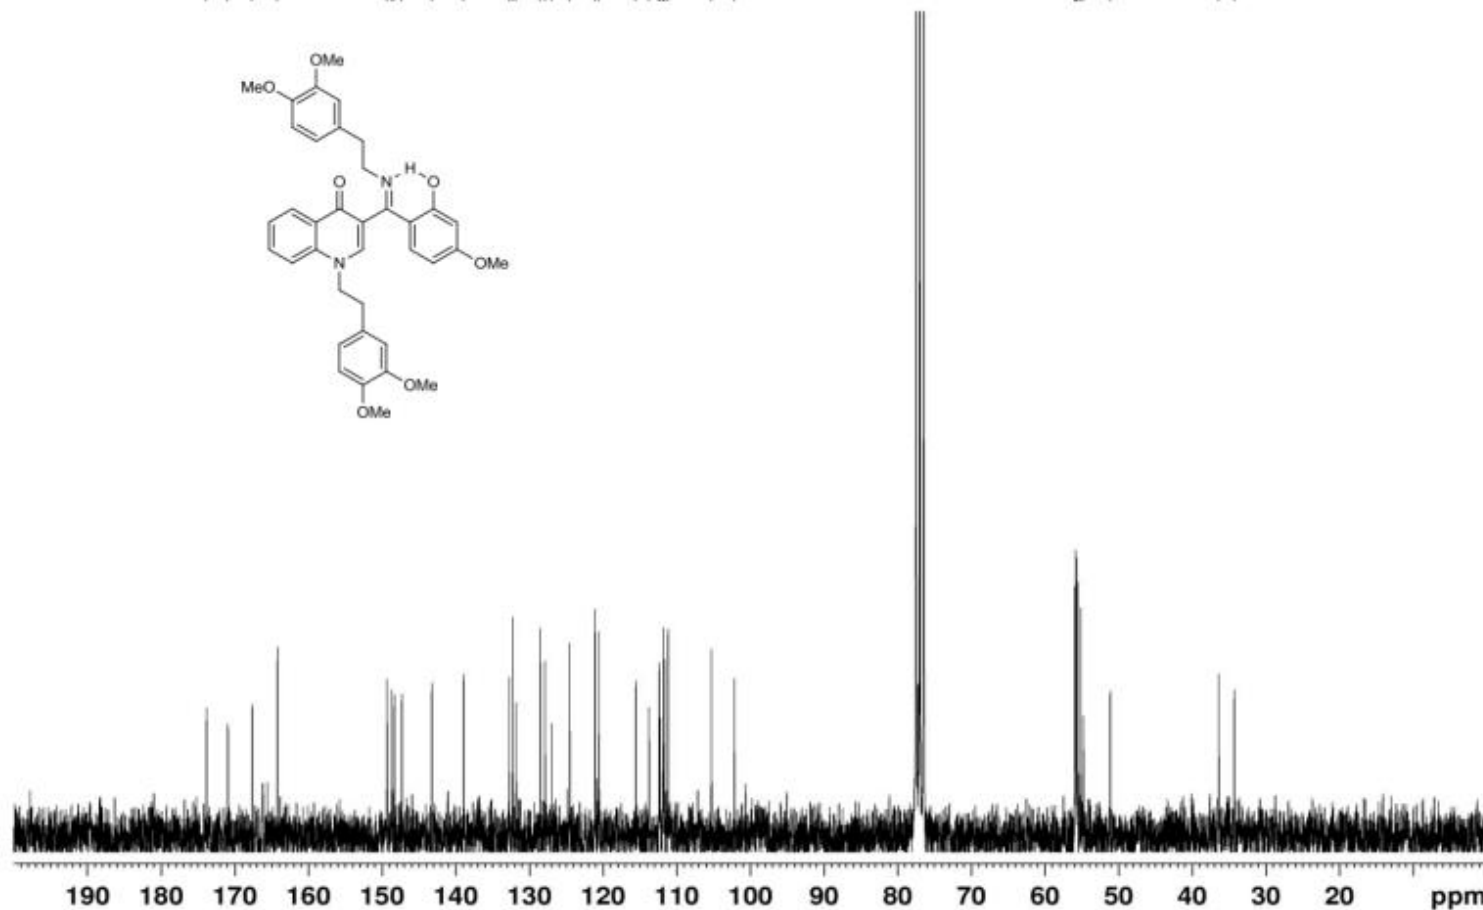

Current Data Paramet  
NAME 130620.226  
EXPNO 10  
PROCNO 1

F2 - Acquisition Parame  
Date\_ 20130620  
Time 17.08  
INSTRUM spec  
PROBHD 5 mm PAB  
PULPROG zgpg  
TD 65536  
SOLVENT CDC  
NS 1024  
DS 4  
SWH 15000.000  
FIDRES 0.22888  
AQ 2.1845834  
RG 2050  
DW 33.333 us  
DE 10.00 us  
TE 300.5 K  
D1 2.00000000  
d11 0.03000000  
DELTA 1.8999999  
TD0 1

===== CHANNEL  
NUC1 13C  
P1 10.00 usec  
PL1 -1.00 dB  
SFO1 62.901528

===== CHANNEL  
CPDPRG2 waltz16  
NUC2 1H  
PCPD2 70.00 us  
PL12 15.00 dB  
PL13 15.00 dB  
PL2 -2.50 dB  
SFO2 250.131000

F2 - Processing paramet  
SI 32768  
SF 62.8952388  
WDW EM  
SSB 0  
LB 1.00 Hz  
GB 0  
PC 1.40



# Compound 4g

Mkrtchyan SM781 1H CDC13

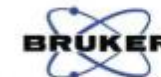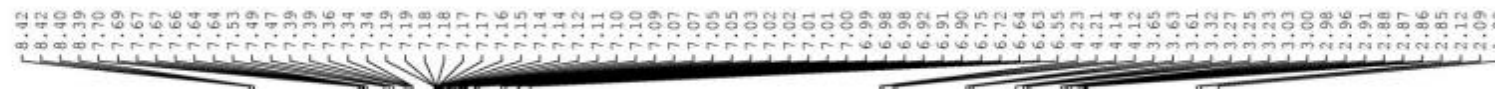

Current Data Parameters  
 NAME 130507.u303  
 EXPNO 10  
 PROCNO 1

F2 - Acquisition Parameters  
 Date\_ 20130507  
 Time 8.42  
 INSTRUM spect  
 PROBHD 5 mm PABB  
 PULPROG zg30  
 TD 65536  
 SOLVENT CDC13  
 NS 16  
 DS 2  
 SWH 6188.119 Hz  
 FIDRES 0.094423  
 AQ 5.2953587 s  
 RG 32  
 DW 80.800 usec  
 DE 10.00 usec  
 TE 298.2 K  
 D1 1.00000000 s  
 TDO 1

CHANNEL f  
 NUC1 1H  
 P1 10.00 usec  
 PL1 0 dB  
 PL1W 11.2532510e  
 SFO1 300.1318534  
 F2 - Processing parameters  
 SI 32768  
 SF 300.1300412 MHz  
 WDW EM  
 SSB 0  
 LB 0.30 Hz  
 GB 0  
 PC 1.00

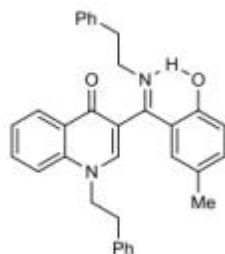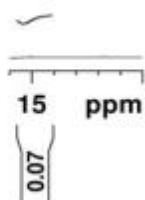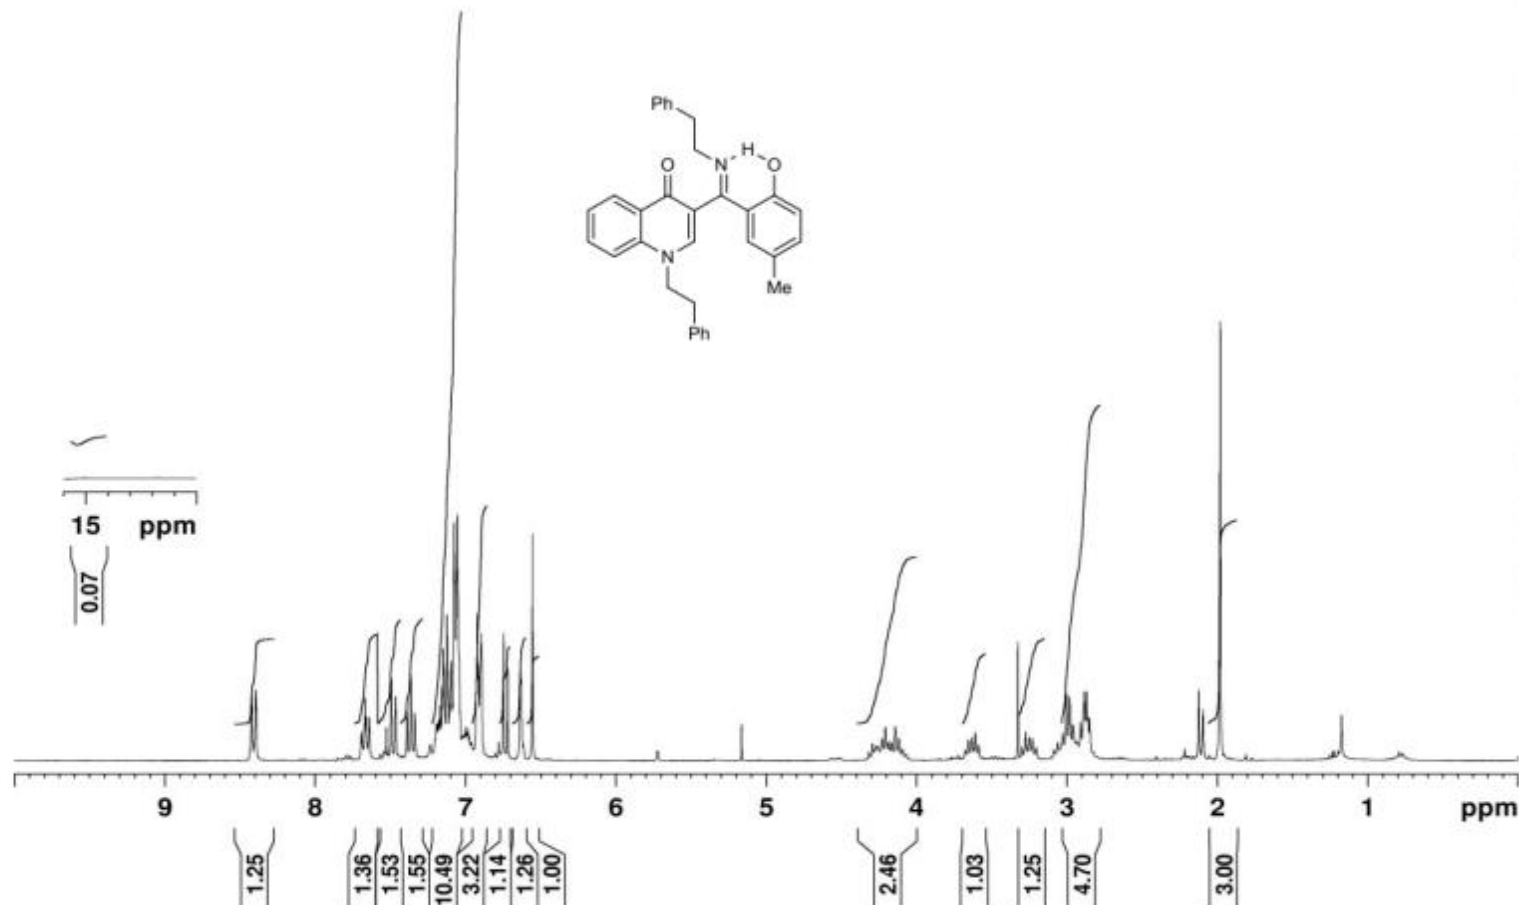

# Compound 4g

Mkrtchyan SM781 13C CDC13

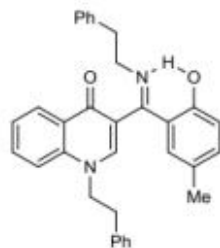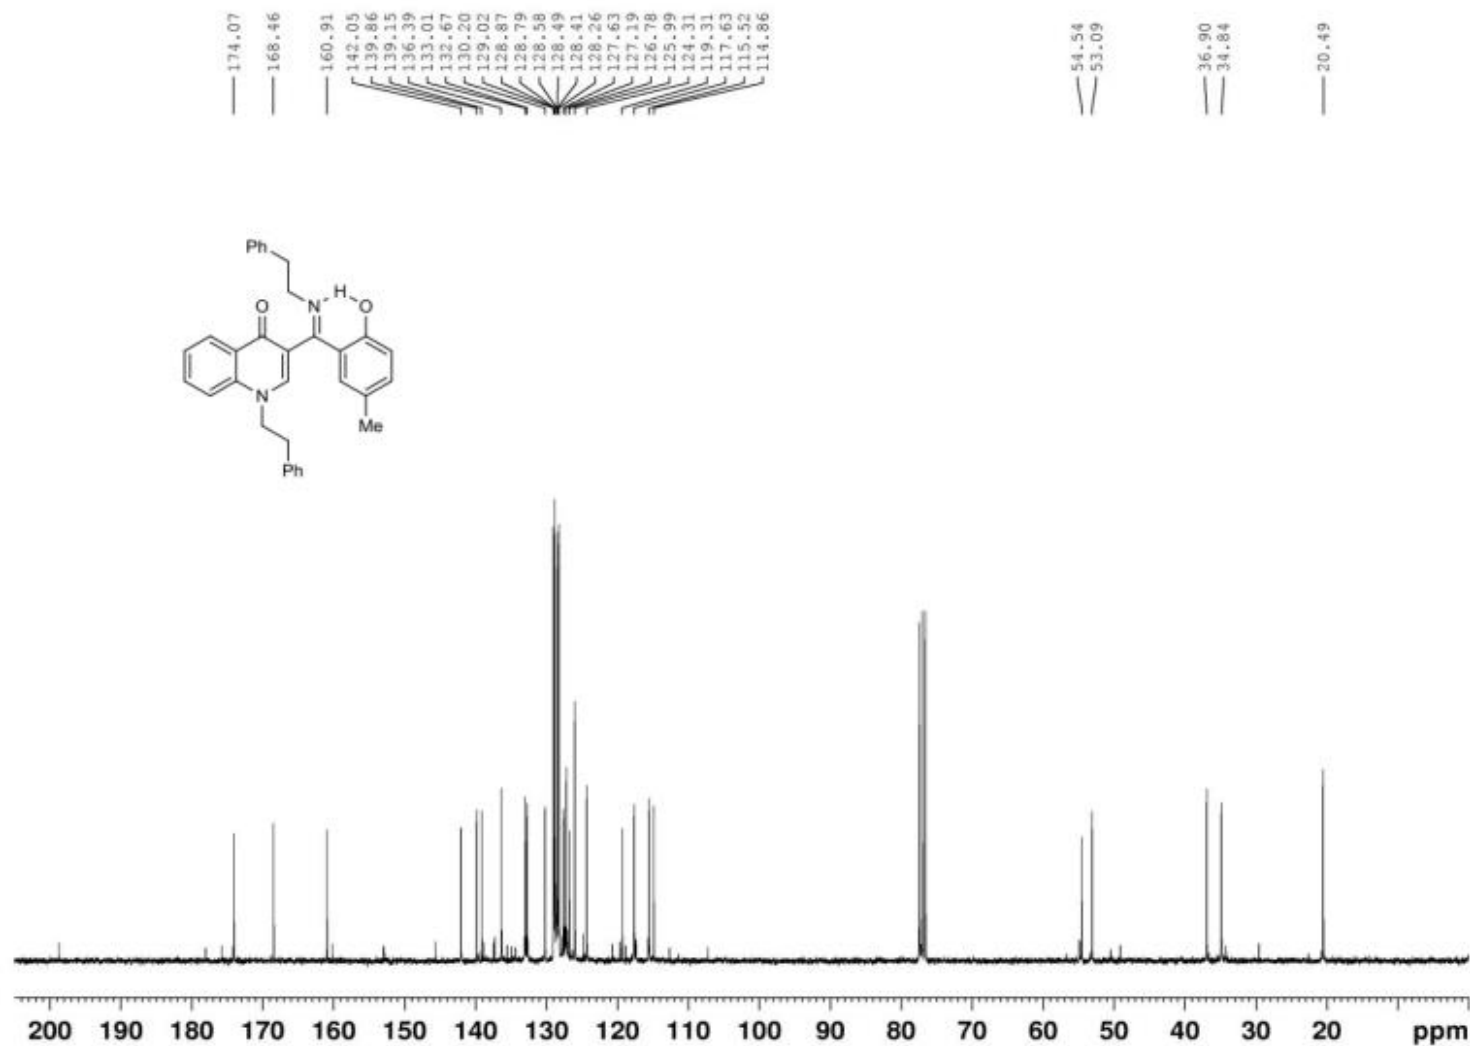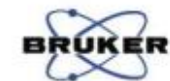

Current Data Parameters  
 NAME 130507.u305  
 EXPNO 11  
 PROCNO 1

F2 - Acquisition Parameters  
 Date\_ 20130507  
 Time 12.11  
 INSTRUM spect  
 PROBHD 5 mm PAB  
 PULPROG zgpg  
 TD 65536  
 SOLVENT CDCl3  
 NS 1024  
 DS 4  
 SWH 18028.846  
 FIDRES 0.275098  
 AQ 1.8175818 s  
 RG 2050  
 DW 27.733 usec  
 DE 10.00 usec  
 TE 298.6 K  
 D1 2.0000000 s  
 D11 0.0300000 s  
 TDO 1

===== CHANNEL  
 NUC1 13C  
 P1 10.00 usec  
 PL1 -0.50 dB  
 PL1W 33.256919E  
 SFO1 75.475295E

===== CHANNEL  
 CPDPRG2 waltz1  
 NUC2 1H  
 PCPD2 72.00 usec  
 PL2 0 dB  
 PL12 17.00 dB  
 PL13 17.00 dB  
 PL2W 11.253251E  
 PL12W 0.224531E  
 PL13W 0.224531E  
 SFO2 300.131200E

F2 - Processing parameters  
 SI 32768  
 SF 75.4677613 MHz  
 WDW EM  
 SSB 0  
 LB 1.00 Hz  
 GB 0  
 PC 1.40

# Compound 4h

Mkrtchyan SM798 1H CDC13

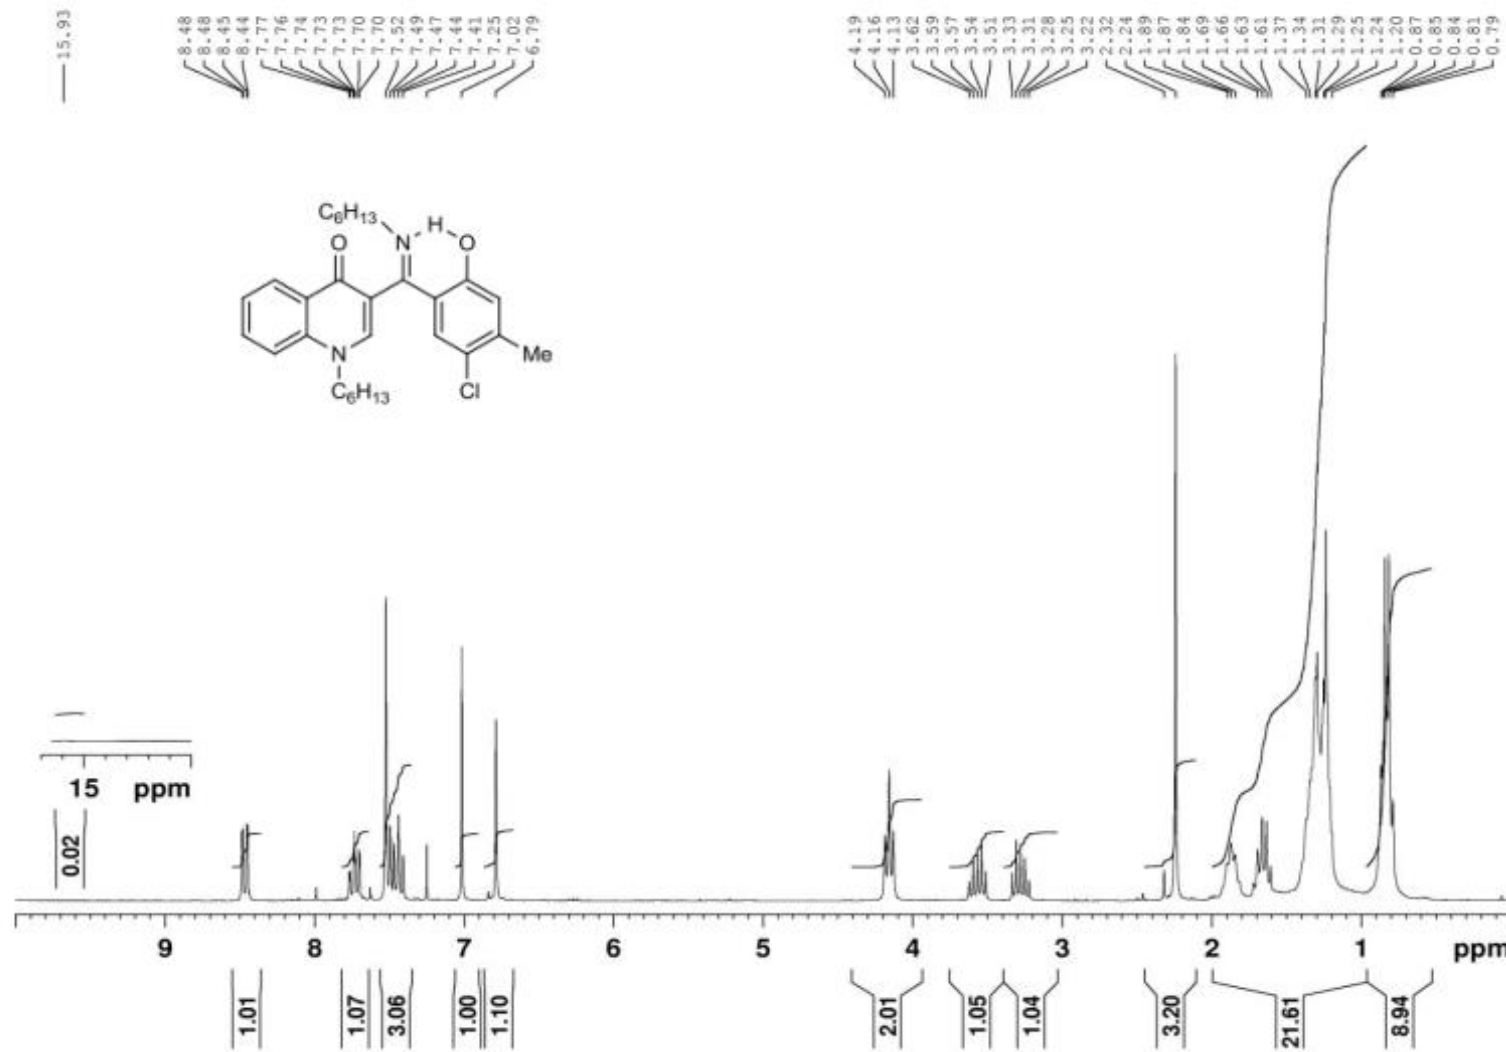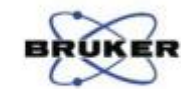

Current Data Params  
 NAME 130620.212  
 EXPNO 10  
 PROCNO 1

F2 - Acquisition Params  
 Date 2013062  
 Time 12.34  
 INSTRUM spect  
 PROBHD 5 mm PA1  
 PULPROG zg  
 TD 65536  
 SOLVENT CDCl3  
 NS 16  
 DS 2  
 SWH 5165.28  
 FIDRES 0.0788  
 AQ 6.3439350  
 RG 161  
 DW 96.800  
 DE 10.00  
 TE 298.2 K  
 D1 1.0000000  
 TDO 1

===== CHANNEL  
 NUC1 1H  
 P1 10.00  
 PL1 -2.50  
 SFO1 250.13154

F2 - Processing params  
 SI 32768  
 SF 250.130002  
 WDW EM  
 SSB 0  
 LB 0.30 Hz  
 GB 0  
 PC 1.00

# Compound 4h

Mkrtchyan SM798 13C CDC13

|        |        |       |
|--------|--------|-------|
| 173.79 | 142.63 | 53.67 |
| 167.29 | 140.76 | 50.94 |
| 163.73 | 139.31 |       |
|        | 132.68 |       |
|        | 129.69 |       |
|        | 127.60 |       |
|        | 127.07 |       |
|        | 124.48 |       |
|        | 121.73 |       |
|        | 120.77 |       |
|        | 118.41 |       |
|        | 115.66 |       |
|        | 114.04 |       |

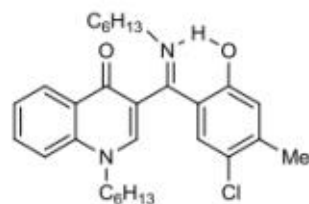

|       |       |       |       |       |       |       |       |       |       |       |       |       |
|-------|-------|-------|-------|-------|-------|-------|-------|-------|-------|-------|-------|-------|
| 31.46 | 31.17 | 31.17 | 30.31 | 29.59 | 28.76 | 26.98 | 26.28 | 22.42 | 22.31 | 20.25 | 13.82 | 13.62 |
|-------|-------|-------|-------|-------|-------|-------|-------|-------|-------|-------|-------|-------|

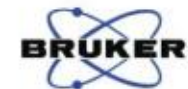

Current Data Parameters:  
 NAME 130621.u316 s  
 EXPNO 10  
 PROCNO 1

F2 - Acquisition Parameters  
 Date\_ 20130623  
 Time 5.44  
 INSTRUM spect  
 PROBHD 5 mm PABBC  
 PULPROG zgpg30  
 TD 65536  
 SOLVENT CDC13  
 NS 1024  
 DS 4  
 SWH 18028.846 Hz  
 FIDRES 0.275096 Hz  
 AQ 1.8175818 sec  
 RG 2050  
 DW 27.733 usec  
 DE 10.00 usec  
 TE 299.1 K  
 D1 2.0000000 sec  
 D11 0.0300000 sec  
 TD0 1

===== CHANNEL f1  
 NUC1 13C  
 P1 10.00 usec  
 PL1 -0.50 dB  
 PL1W 33.25691986  
 SFO1 75.4752953 MHz

===== CHANNEL f2  
 CPDPRG2 waltz16  
 NUC2 1H  
 PCPD2 72.00 usec  
 PL2 0 dB  
 PL12 17.00 dB  
 PL13 17.00 dB  
 PL2W 11.25325108  
 PL12W 0.22453187  
 PL13W 0.22453187  
 SFO2 300.1312005 MHz

F2 - Processing parameters  
 SI 32768  
 SF 75.4677569 MHz  
 WDW EM  
 SSB 0  
 LB 1.00 Hz  
 GB 0  
 PC 1.40

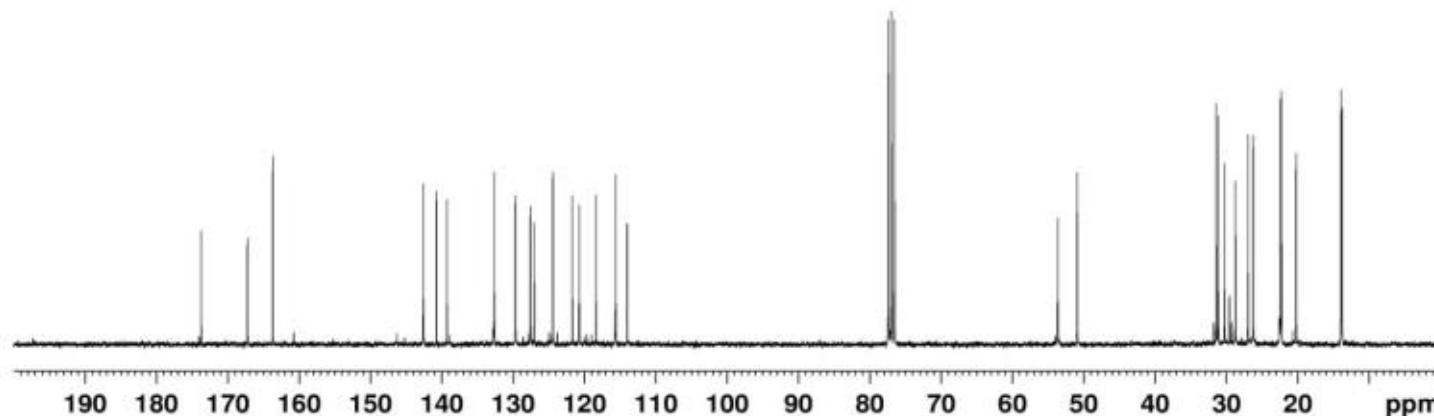

# Compound 4i

Mkrtchyan SM800 1H CDC13

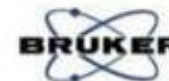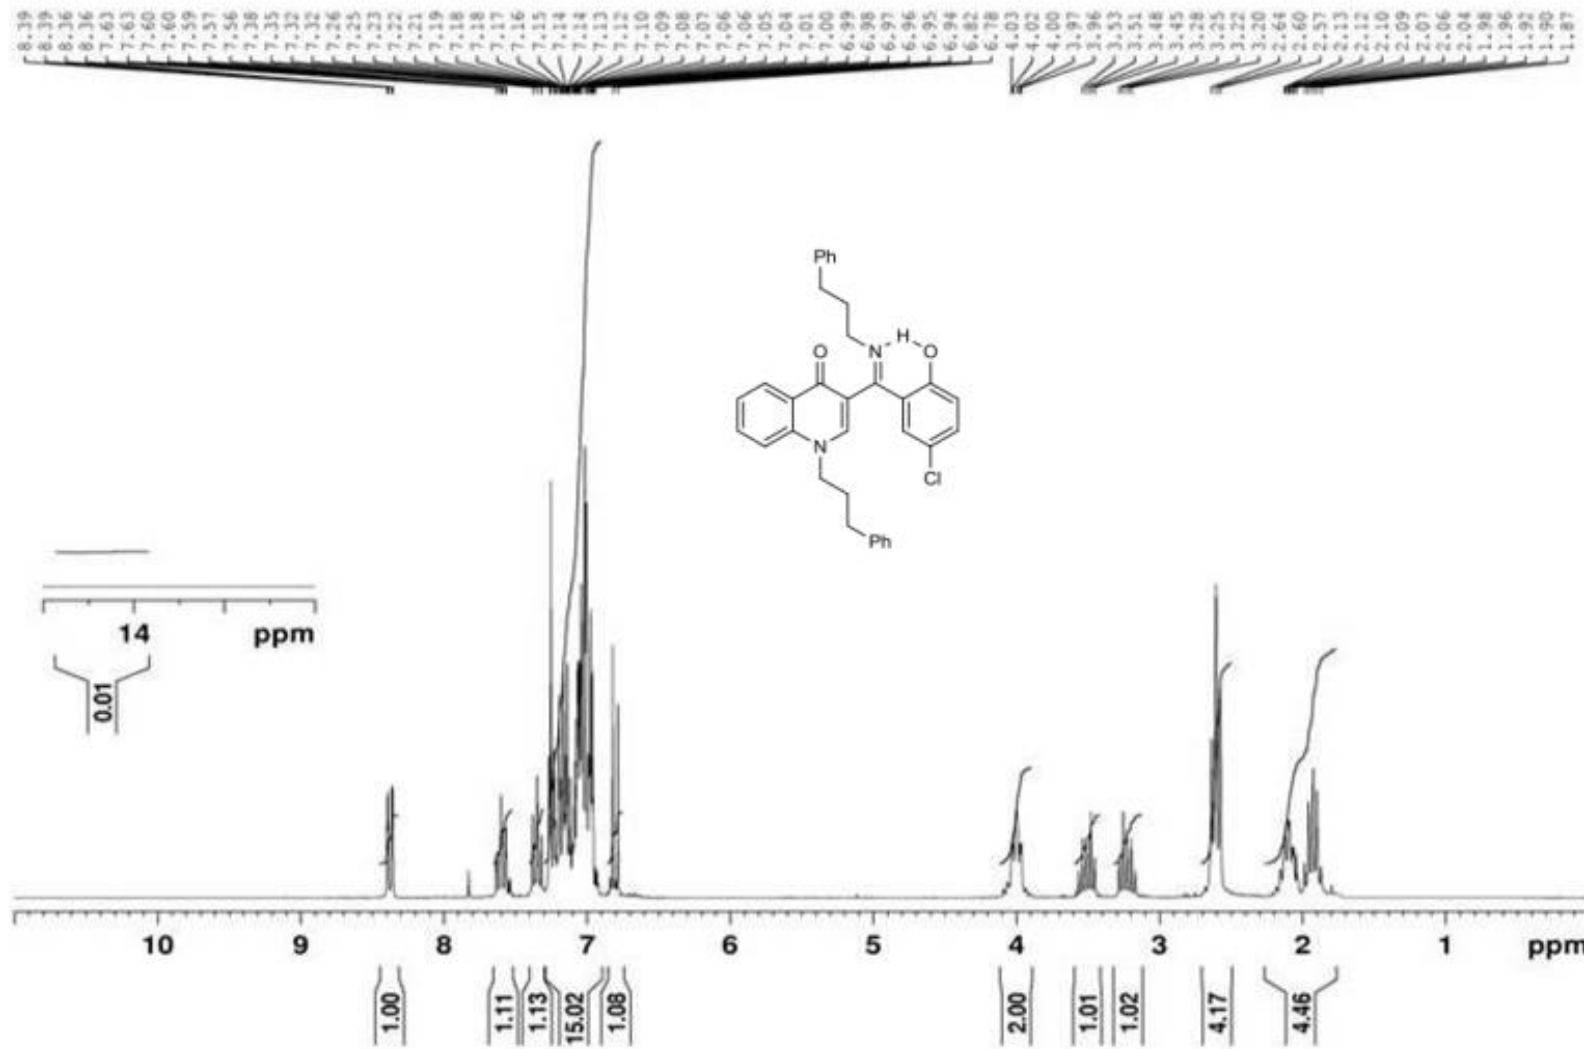

Current Data Paramet  
 NAME 130620.213  
 EXPNO 10  
 PROCNO 1

F2 - Acquisition Param  
 Date 20130620  
 Time 12.41  
 INSTRUM spect  
 PROBHD 5 mm PAB1  
 PULPROG zg30  
 TD 65536  
 SOLVENT CDCl  
 NS 16  
 DS 2  
 SWH 5165.289  
 FIDRES 0.078816  
 AQ 6.3439350  
 RG 228  
 DW 96.800 us  
 DE 10.00 use  
 TE 298.2 K  
 D1 1.0000000  
 TD0 1

----- CHANNEL -----  
 NUC1 1H  
 P1 10.00 use  
 PL1 -2.50 dB  
 SFO1 250.131544

F2 - Processing param  
 SI 32768  
 SF 250.1300316  
 WDW EM  
 SSB 0  
 LB 0.30 Hz  
 GB 0  
 PC 1.00

# Compound 4i

Mkrtchyan SM800 13C CDC13

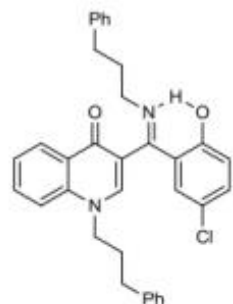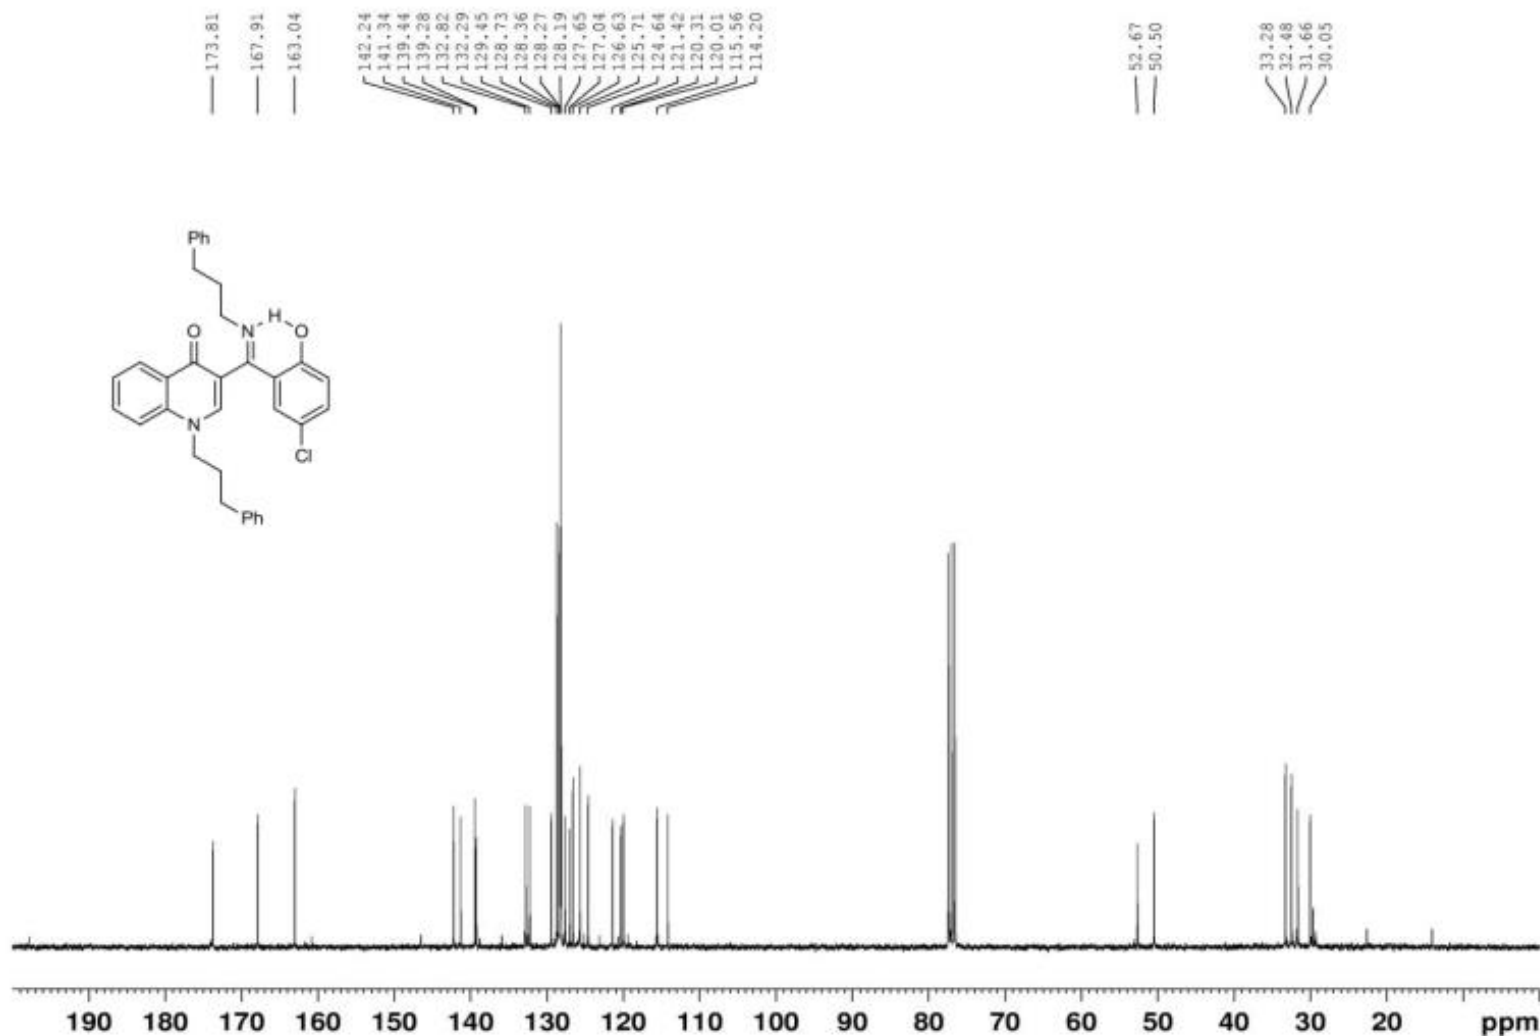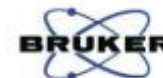

Current Data Parameter  
 NAME 130621.u315  
 EXPNO 10  
 PROCNO 1

F2 - Acquisition Param  
 Date\_ 20130623  
 Time 4.16  
 INSTRUM spect  
 PROBHD 5 mm PABP  
 PULPROG zgpg3  
 TD 65536  
 SOLVENT CDCl3  
 NS 1024  
 DS 4  
 SWH 18028.846  
 FIDRES 0.275098  
 AQ 1.8175818 s  
 RG 2050  
 DW 27.733 us  
 DE 10.00 usec  
 TE 299.2 K  
 D1 2.0000000 s  
 D11 0.0300000 s  
 TD0 1

----- CHANNEL f  
 NUC1 13C  
 P1 10.00 usec  
 PL1 -0.50 dB  
 PL1W 33.2569198t  
 SFO1 75.4752953

----- CHANNEL f  
 CPDPRG2 waltz16  
 NUC2 1H  
 PCPD2 72.00 us  
 PL2 0 dB  
 PL12 17.00 dB  
 PL13 17.00 dB  
 PL2W 11.2532510t  
 PL12W 0.2245318t  
 PL13W 0.2245318t  
 SFO2 300.1312005

F2 - Processing param  
 SI 32768  
 SF 75.4677575 M  
 WDW EM  
 SSB 0  
 LB 1.00 Hz  
 GB 0  
 PC 1.40



# Compound 4j

Mkrtchyan SM805 1H CDC13

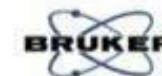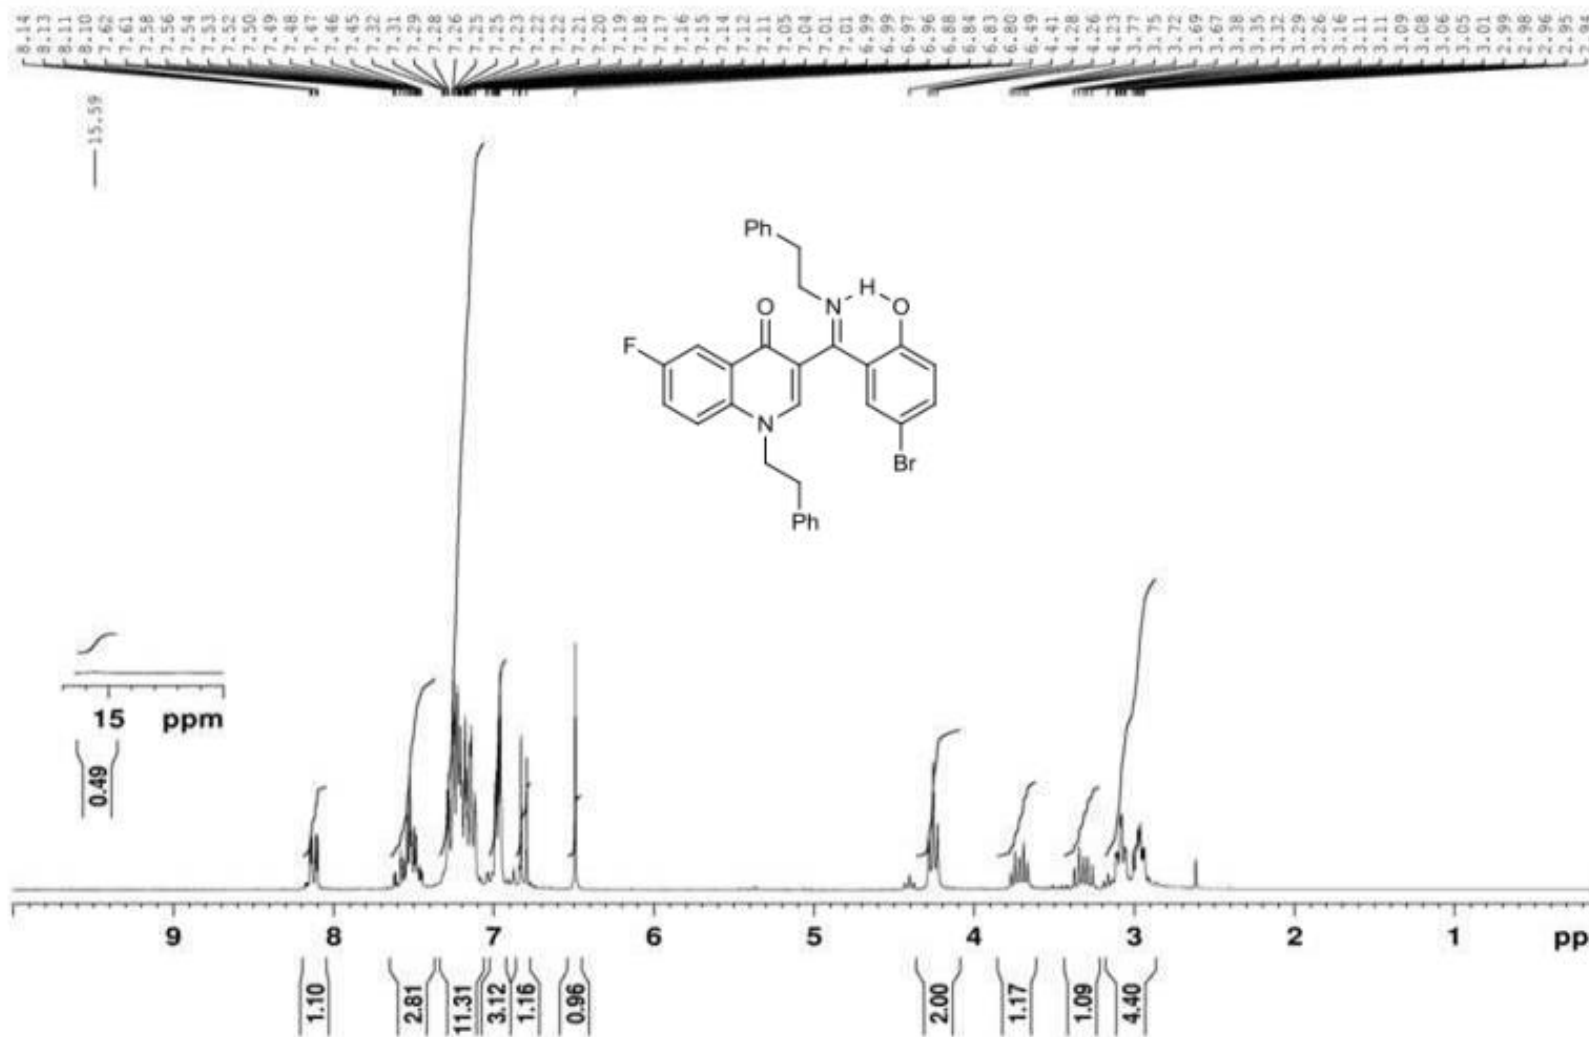

Current Data Paramet  
 NAME 130626.207  
 EXPNO 10  
 PROCNO 1

F2 - Acquisition Parar  
 Date 20130626  
 Time 11.19  
 INSTRUM spec  
 PROBHD 5 mm PAB  
 PULPROG zg3  
 TD 65536  
 SOLVENT CDC  
 NS 16  
 DS 2  
 SWH 5165.289  
 FIDRES 0.07881  
 AQ 6.3439350  
 RG 228  
 DW 96.800 u  
 DE 10.00 us  
 TE 298.1 K  
 D1 1.00000000  
 TD0 1

----- CHANNEL  
 NUC1 1H  
 P1 10.00 us  
 PL1 -2.50 dB  
 SFO1 250.13154

F2 - Processing parar  
 SI 32768  
 SF 250.1300026  
 WDW EM  
 SSB 0  
 LB 0.30 Hz  
 GB 0  
 PC 1.00

# Compound 4j

Mkrtchyan SM805 13C CDC13

173.12  
173.07  
167.53  
162.65  
157.56  
142.05  
139.55  
136.11  
135.73  
135.01  
132.30  
129.10  
129.08  
128.59  
128.49  
128.42  
127.64  
127.49  
126.26  
121.70  
121.30  
120.87  
120.20  
117.94  
117.81  
113.19  
112.66  
112.30  
108.69

55.01  
53.19

36.76  
34.94

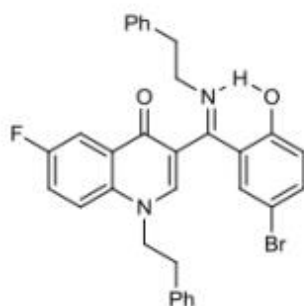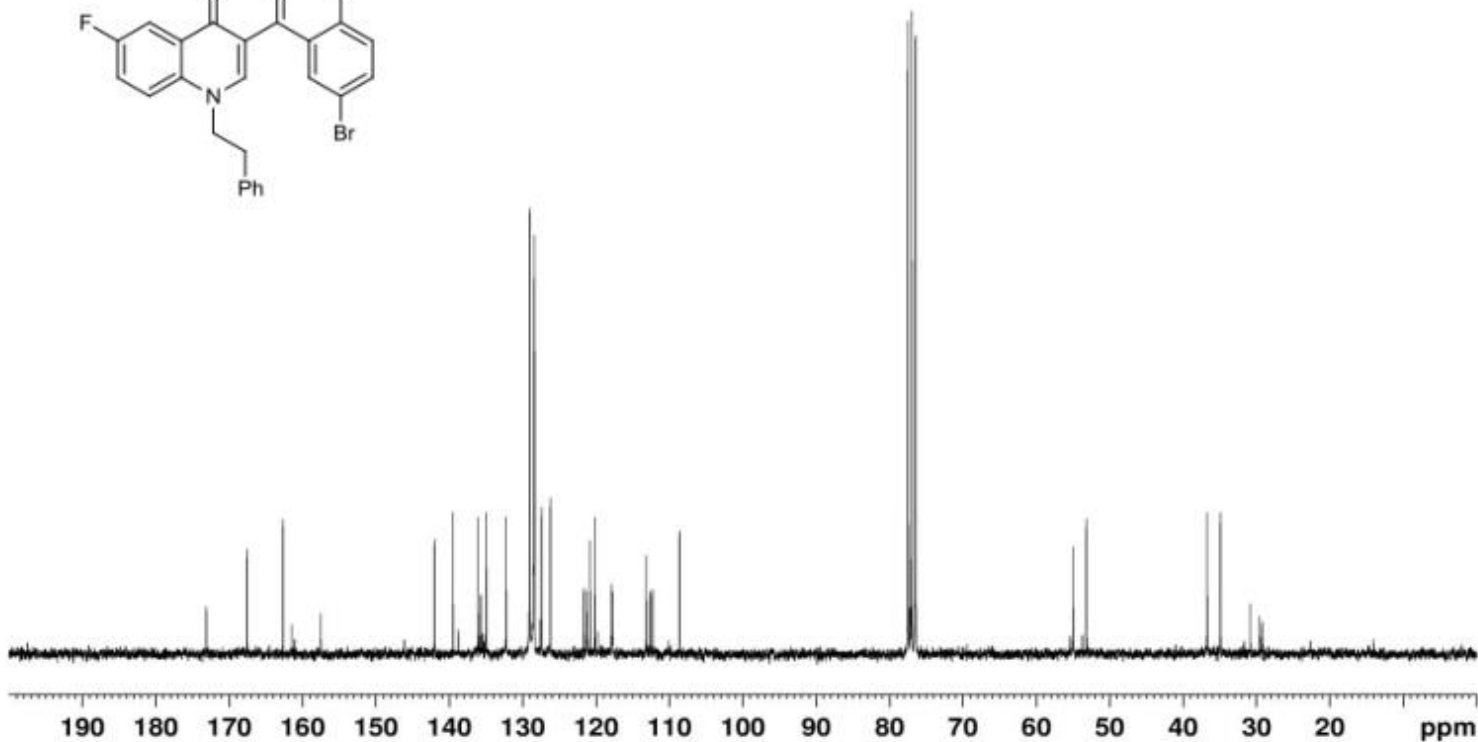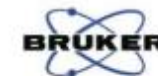

Current Data Paramete  
NAME 130627.220 t  
EXPNO 10  
PROCNO 1

F2 - Acquisition Param  
Date\_ 20130628  
Time 7.59  
INSTRUM spect  
PROBHD 5 mm PABl  
PULPROG zgpgc  
TD 65536  
SOLVENT CDCl  
NS 1024  
DS 4  
SWH 15000.000  
FIDRES 0.22888z  
AQ 2.1845834 s  
RG 2050  
DW 33.333 us  
DE 10.00 use  
TE 298.0 K  
D1 2.00000000 s  
d11 0.03000000 :  
DELTA 1.8999999  
TD0 1

===== CHANNEL 1  
NUC1 13C  
P1 10.00 usec  
PL1 -1.00 dB  
SFO1 62.9015280

===== CHANNEL 2  
CPDPRG2 waltz1  
NUC2 1H  
PCPD2 70.00 u  
PL12 15.00 dB  
PL13 15.00 dB  
PL2 -2.50 dB  
SFO2 250.131000

F2 - Processing param  
SI 32768  
SF 62.8952420 I  
WDW EM  
SSB 0  
LB 1.00 Hz  
GB 0  
PC 1.40



# Compound 4k

Mkrtchyan SM822-2 1H CDC13

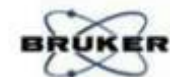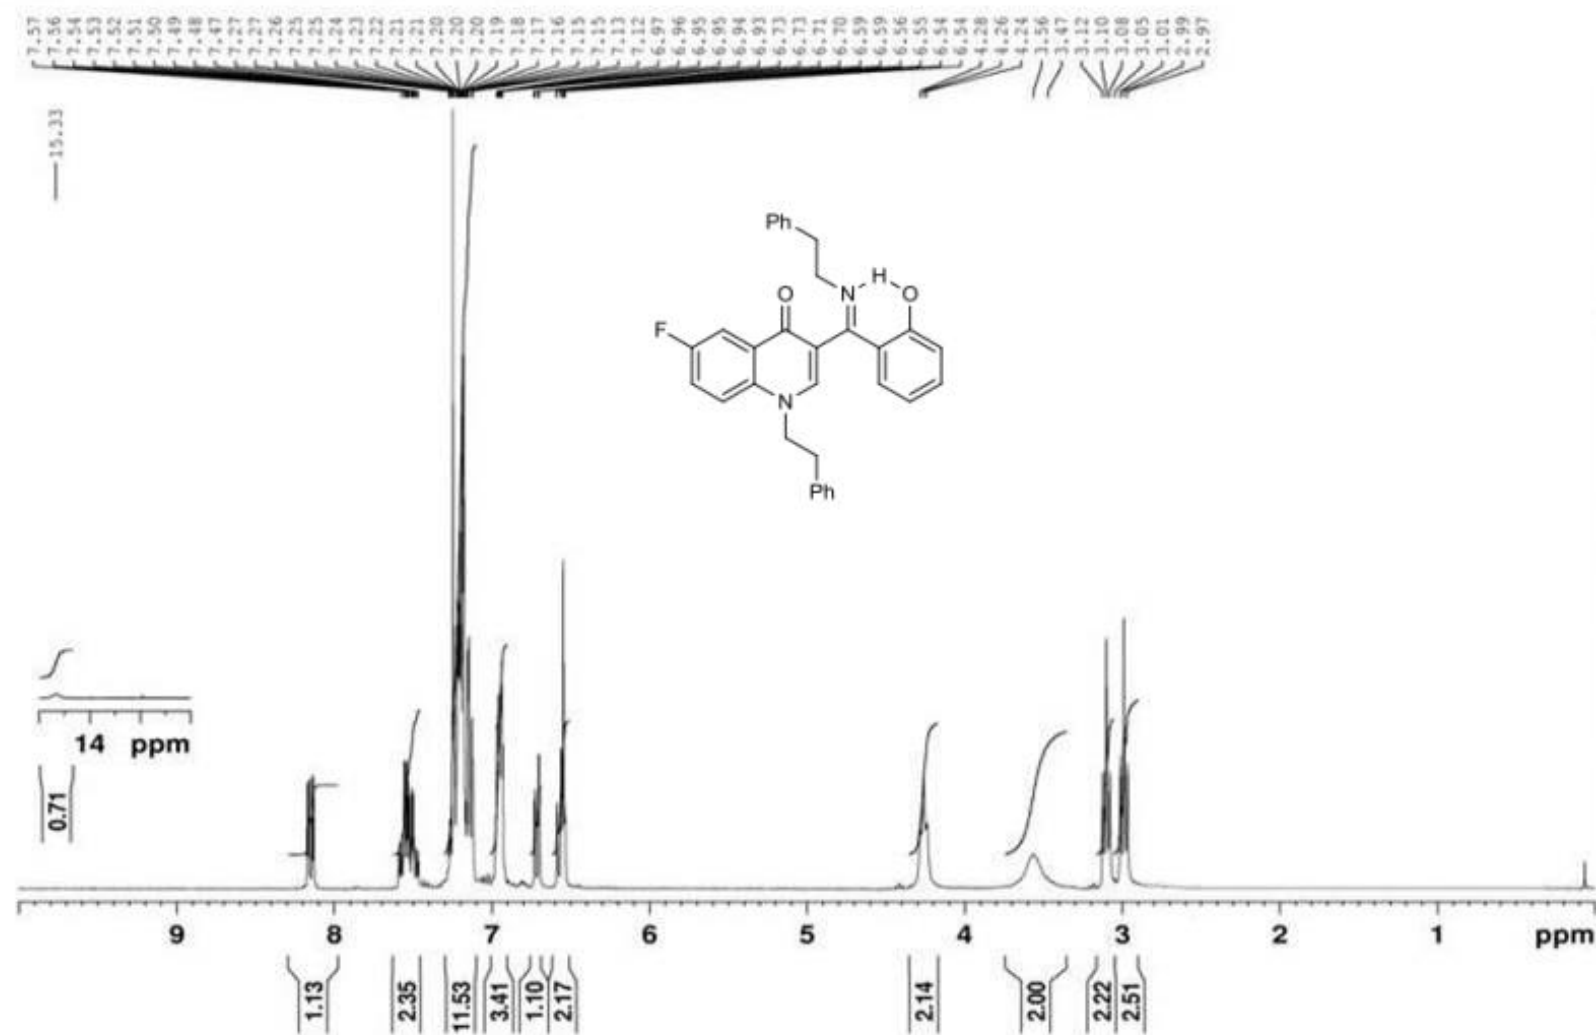

Current Data Param  
 NAME 130830.u3  
 EXPNO 10  
 PROCNO

F2 - Acquisition Par  
 Date 201308  
 Time 13.36  
 INSTRUM spect  
 PROBHD 5 mm P  
 PULPROG zg  
 TD 65536  
 SOLVENT CD  
 NS 16  
 DS 2  
 SWH 6188.1  
 FIDRES 0.094  
 AQ 5.295358  
 RG 128  
 DW 80.800  
 DE 10.00 L  
 TE 298.2 K  
 D1 1.0000000  
 TD0 1

----- CHANNE  
 NUC1 1H  
 P1 10.00 u  
 PL1 0 dB  
 PL1W 11.25325  
 SFO1 300.1318

F2 - Processing par  
 SI 32768  
 SF 300.13001  
 WDW EM  
 SSB 0  
 LB 0.30 H  
 GB 0  
 PC 1.00

# Compound 4k

Mkrtchyan SM-822-2 13C CDC13

173.21  
168.07  
163.34  
161.45  
157.52  
142.31  
139.91  
136.07  
135.61  
132.16  
130.34  
129.17  
129.12  
128.62  
128.54  
128.35  
127.53  
126.10  
121.54  
121.14  
119.54  
118.03  
117.84  
117.72  
117.36  
113.99  
112.80  
112.44

55.09  
53.24

36.96  
34.76

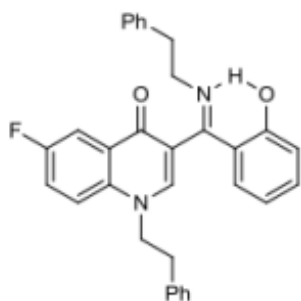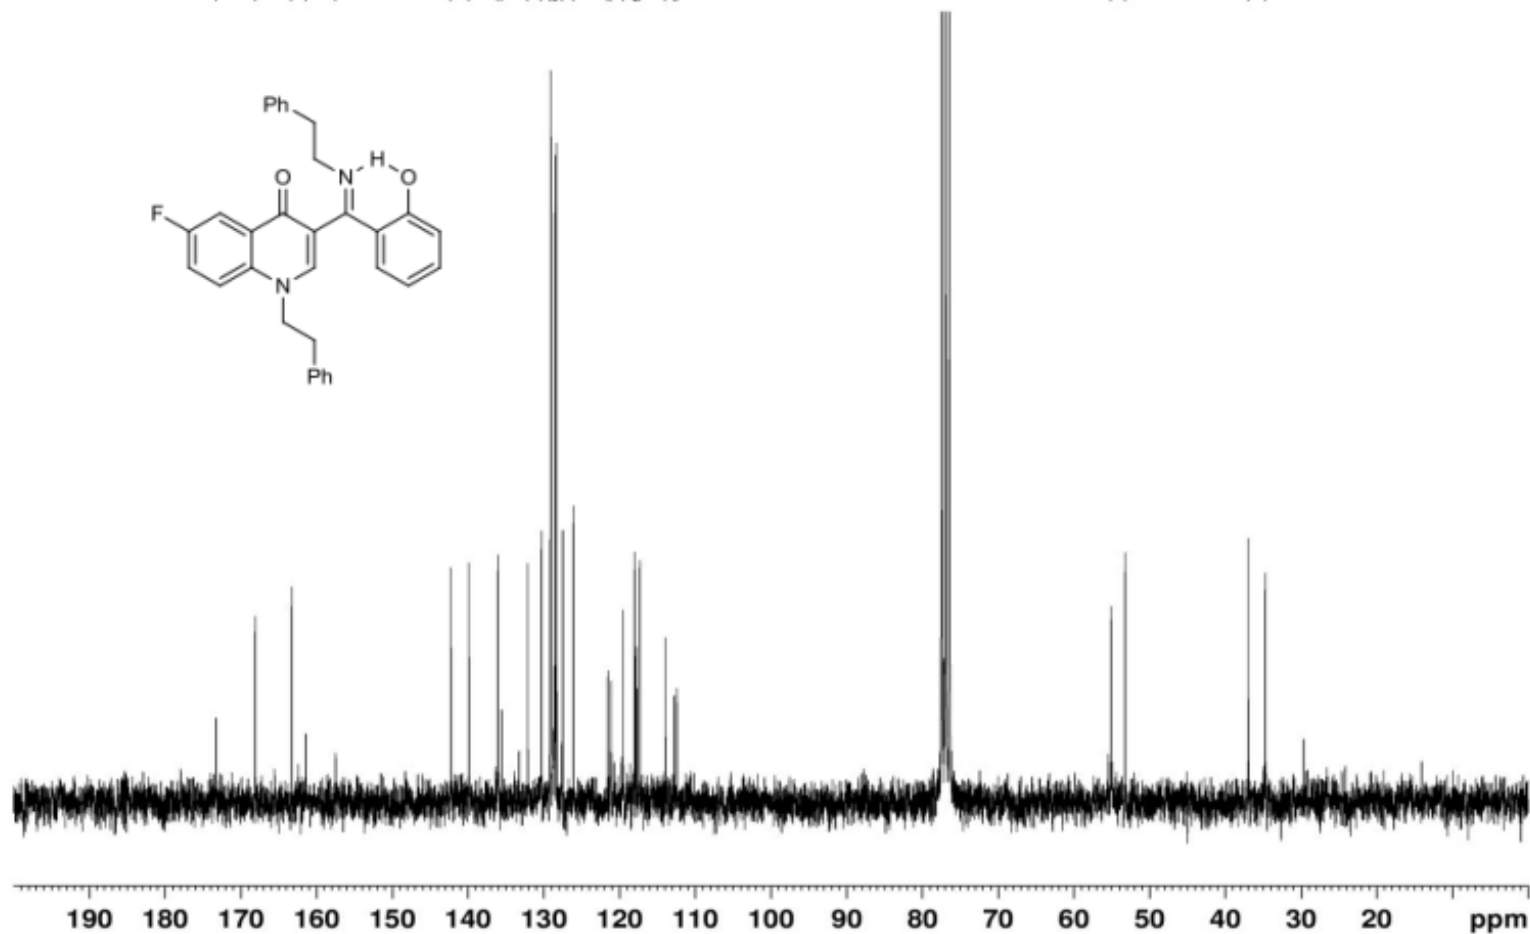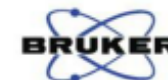

Current Data Parameter  
NAME 130902.208 sr  
EXPNO 10  
PROCNO 1

F2 - Acquisition Parame  
Date\_ 20130902  
Time 22.10  
INSTRUM spect  
PROBHD 5 mm QNP 1  
PULPROG zgpg3k  
TD 65536  
SOLVENT CDC13  
NS 1024  
DS 4  
SWH 15000.000 I  
FIDRES 0.228882  
AQ 2.1845834 se  
RG 2050  
DW 33.333 usec  
DE 10.00 usec  
TE 298.2 K  
D1 2.00000000 se  
d11 0.03000000 se  
DELTA 1.89999996  
TD0 1

----- CHANNEL f1  
NUC1 13C  
P1 10.20 usec  
PL1 0 dB  
SFO1 62.9015280

----- CHANNEL f2  
CPDPRG2 waltz16  
NUC2 1H  
PCPD2 70.00 us  
PL12 14.00 dB  
PL13 14.00 dB  
PL2 -3.00 dB  
SFO2 250.1310005

F2 - Processing param  
SI 32768  
SF 62.8952397 M  
WDW EM  
SSB 0  
LB 1.00 Hz  
GB 0  
PC 1.40

# Compound 4l

Mkrtchyan SM817-2cr 1H CDC13

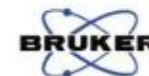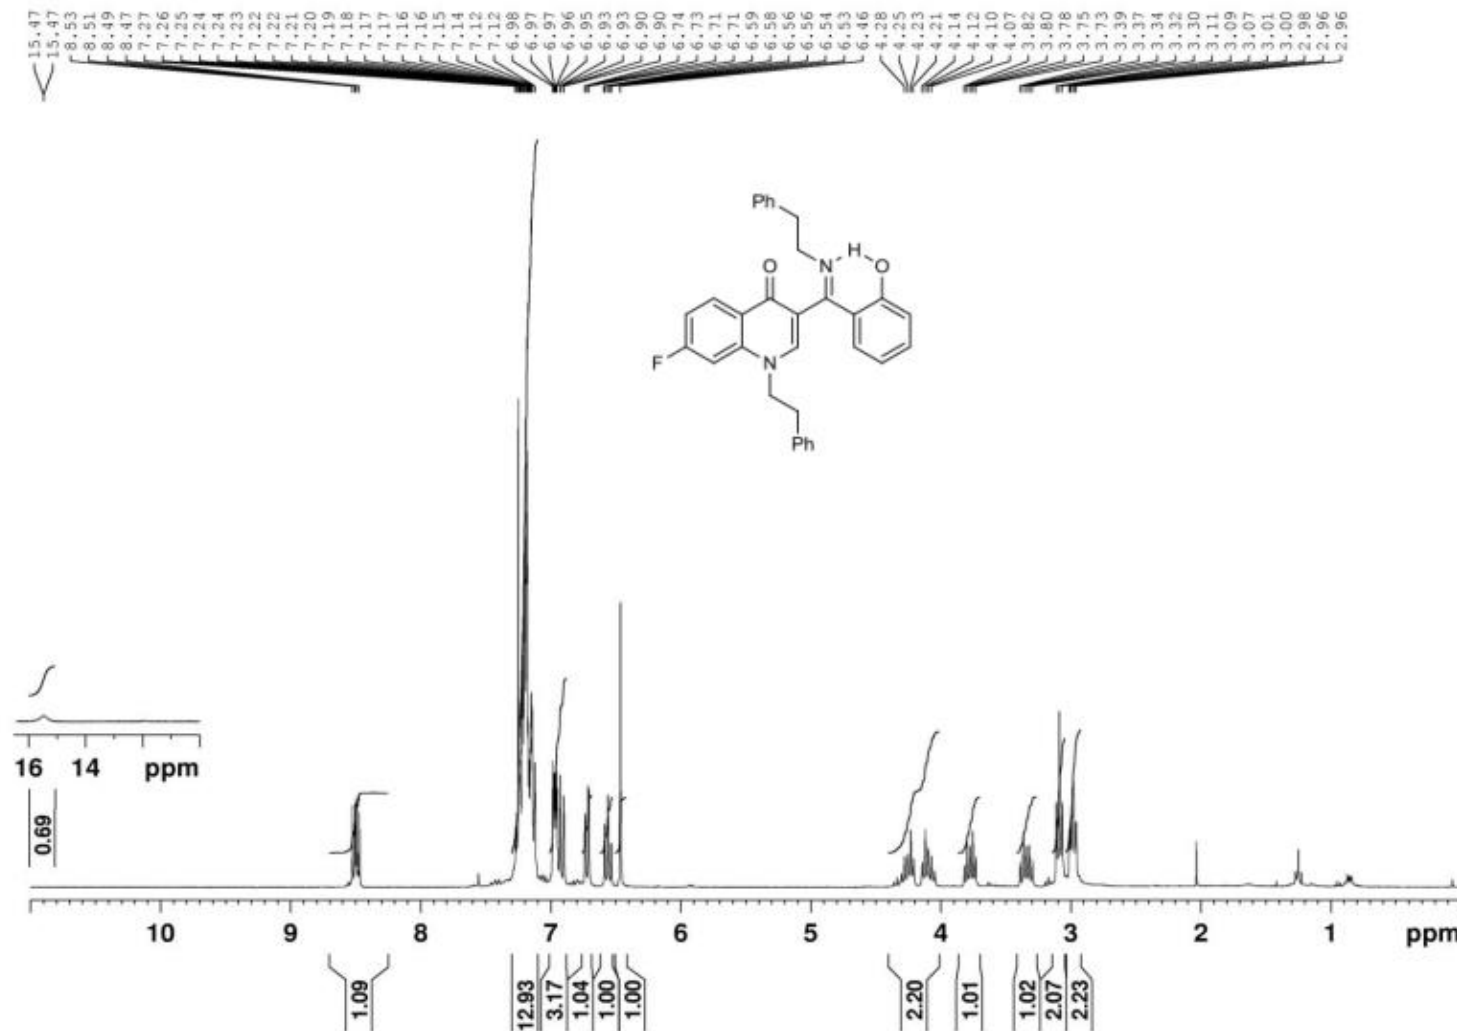

Current Data Parameter:  
 NAME 140414.u305 s  
 EXPNO 10  
 PROCNO 1

F2 - Acquisition Parame  
 Date\_ 20140414  
 Time 10:54  
 INSTRUM spect  
 PROBHD 5 mm PABBI  
 PULPROG zg30  
 TD 65536  
 SOLVENT CDCl3  
 NS 16  
 DS 2  
 SWH 6188.119 Hz  
 FIDRES 0.094423  
 AQ 5.2953587 sec  
 RG 128  
 DW 80.800 usec  
 DE 10.00 usec  
 TE 298.2 K  
 D1 1.0000000 sec  
 TD0 1

----- CHANNEL f1  
 NUC1 1H  
 P1 10.00 usec  
 PL1 0 dB  
 PL1W 11.25325108  
 SFO1 300.1318534

F2 - Processing param  
 SI 32768  
 SF 300.1300141 MHz  
 WDW EM  
 SSB 0  
 LB 0.30 Hz  
 GB 0  
 PC 1.00

# Compound 4l

Mkrtchyan SM817-2cr 13C CDC13

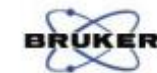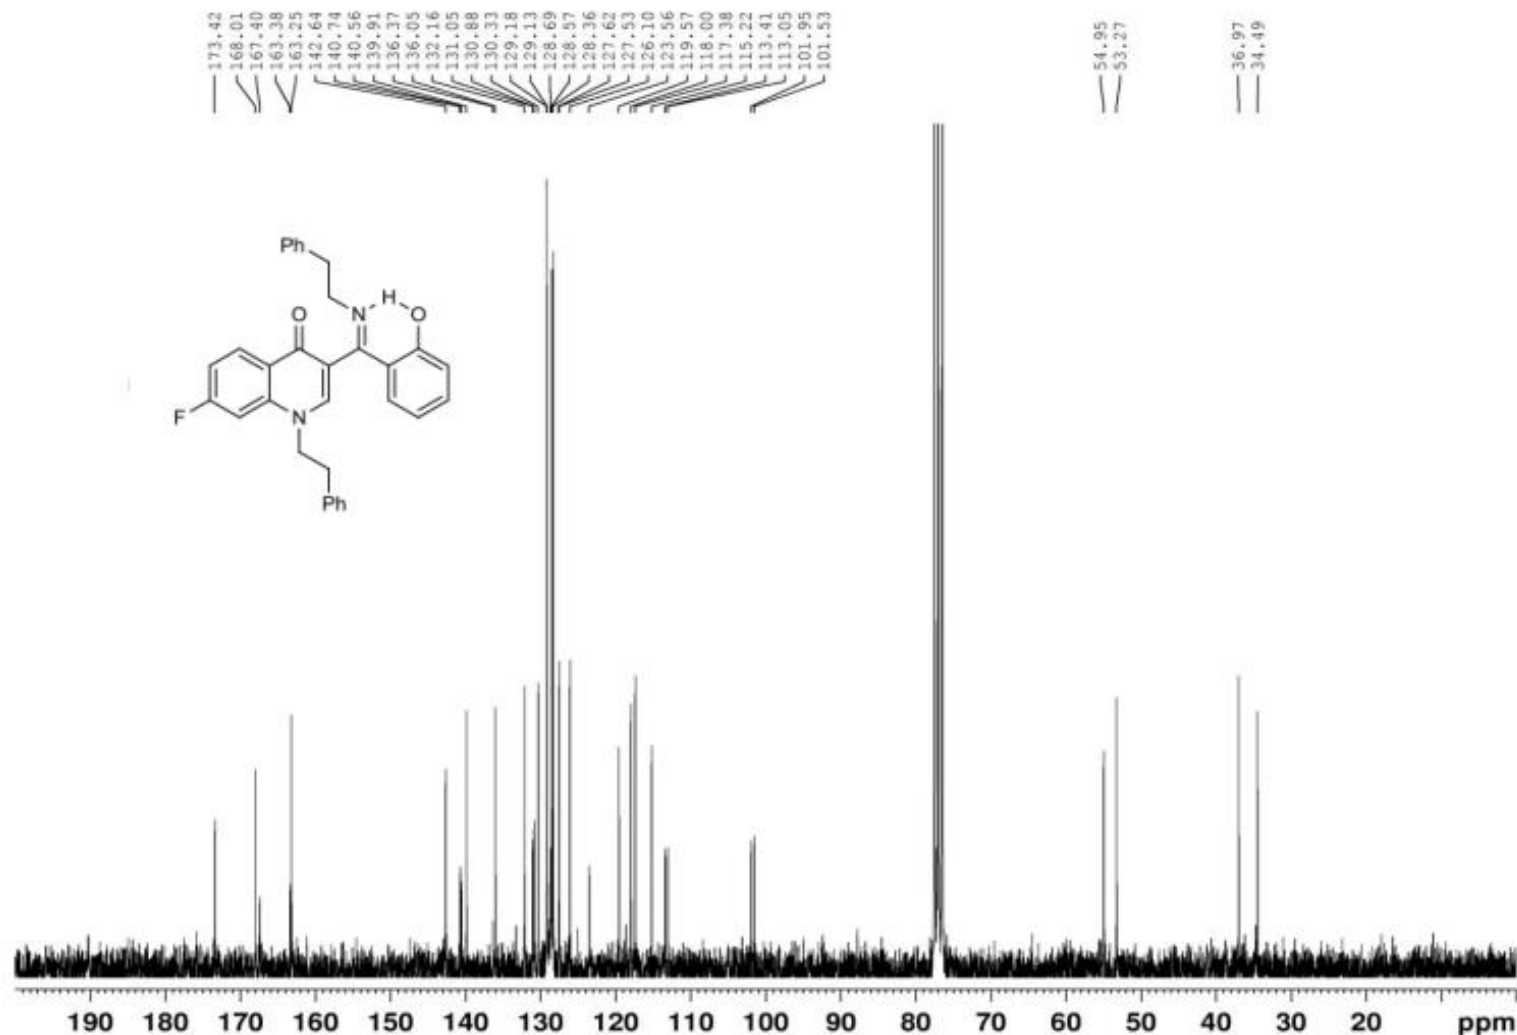

Current Data Parameter  
 NAME 140416.201 sr.  
 EXPNO 10  
 PROCNO 1

F2 - Acquisition Parame  
 Date 20140416  
 Time 14.00  
 INSTRUM spect  
 PROBHD 5 mm PABBO  
 PULPROG zgpg30  
 TD 65536  
 SOLVENT CDC13  
 NS 1024  
 DS 4  
 SWH 15000.000 Hz  
 FIDRES 0.228882  
 AQ 2.1845834 sec  
 RG 2050  
 DW 33.333 usec  
 DE 10.00 usec  
 TE 298.0 K  
 D1 2.00000000 sec  
 d11 0.03000000 sec  
 DELTA 1.89999998  
 TD0 1

----- CHANNEL f1  
 NUC1 13C  
 P1 10.00 usec  
 PL1 -1.00 dB  
 SFO1 62.9015280

----- CHANNEL f2  
 CPDPRG2 waltz16  
 NUC2 1H  
 PCPD2 70.00 us  
 PL12 15.00 dB  
 PL13 15.00 dB  
 PL2 -2.50 dB  
 SFO2 250.1310005

F2 - Processing parame  
 SI 32768  
 SF 62.8952397 MHz  
 WDW EM  
 SSB 0  
 LB 1.00 Hz  
 GB 0  
 PC 1.40

# Compound 4m

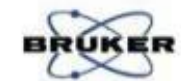

Mkrtchyan SM 819-1 CDCl3 1H

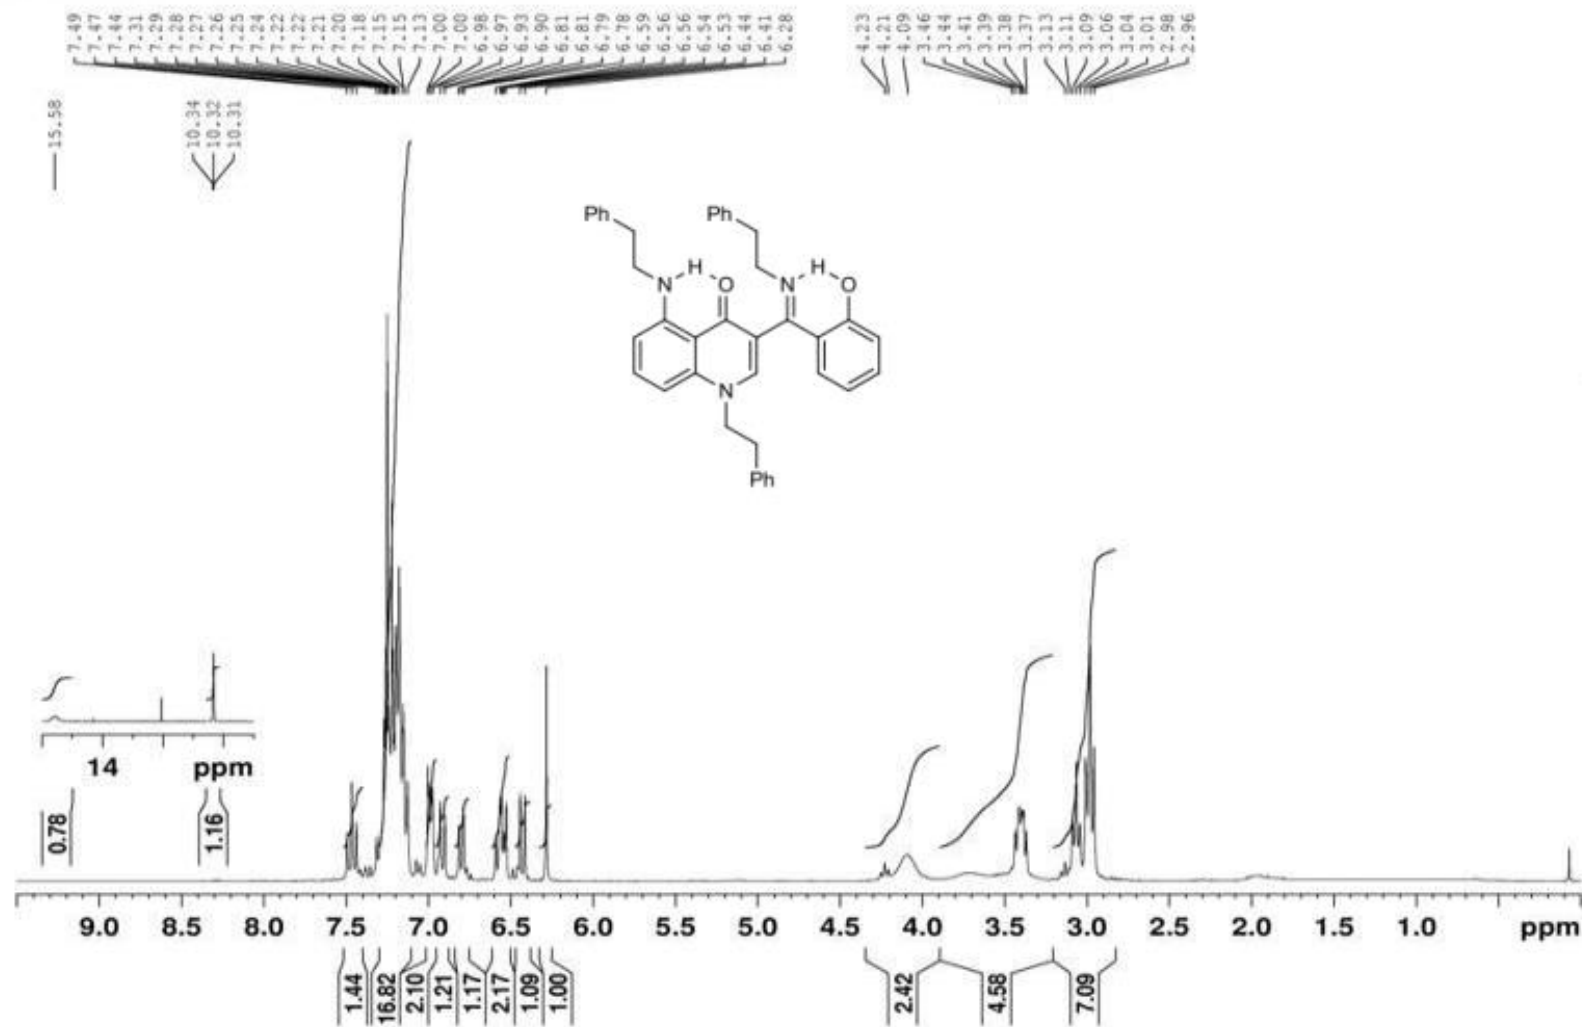

Current Data Parameters  
 NAME 130822.u330.sm  
 EXPNO 10  
 PROCNO 1

F2 - Acquisition Parameter  
 Date\_ 20130822  
 Time 16.10  
 INSTRUM spect  
 PROBHD 5 mm PABBO E  
 PULPROG zg30  
 TD 65536  
 SOLVENT CDCl3  
 NS 16  
 DS 2  
 SWH 6188.119 Hz  
 FIDRES 0.094423 Hz  
 AQ 5.2953587 sec  
 RG 50.8  
 DW 80.800 usec  
 DE 10.00 usec  
 TE 298.2 K  
 D1 1.00000000 sec  
 TD0 1

===== CHANNEL f1 =====  
 NUC1 1H  
 P1 10.00 usec  
 PL1 0 dB  
 PL1W 11.25325108 W  
 SFO1 300.1318534 MHz

F2 - Processing parameter  
 SI 32768  
 SF 300.1300237 MHz  
 WDW EM  
 SSB 0  
 LB 0.30 Hz  
 GB 0  
 PC 1.00

# Compound 4m

Mkrtschyan SM819-1 CDCl3 13C

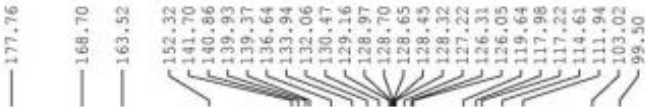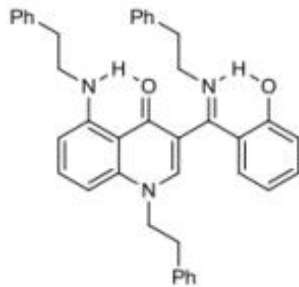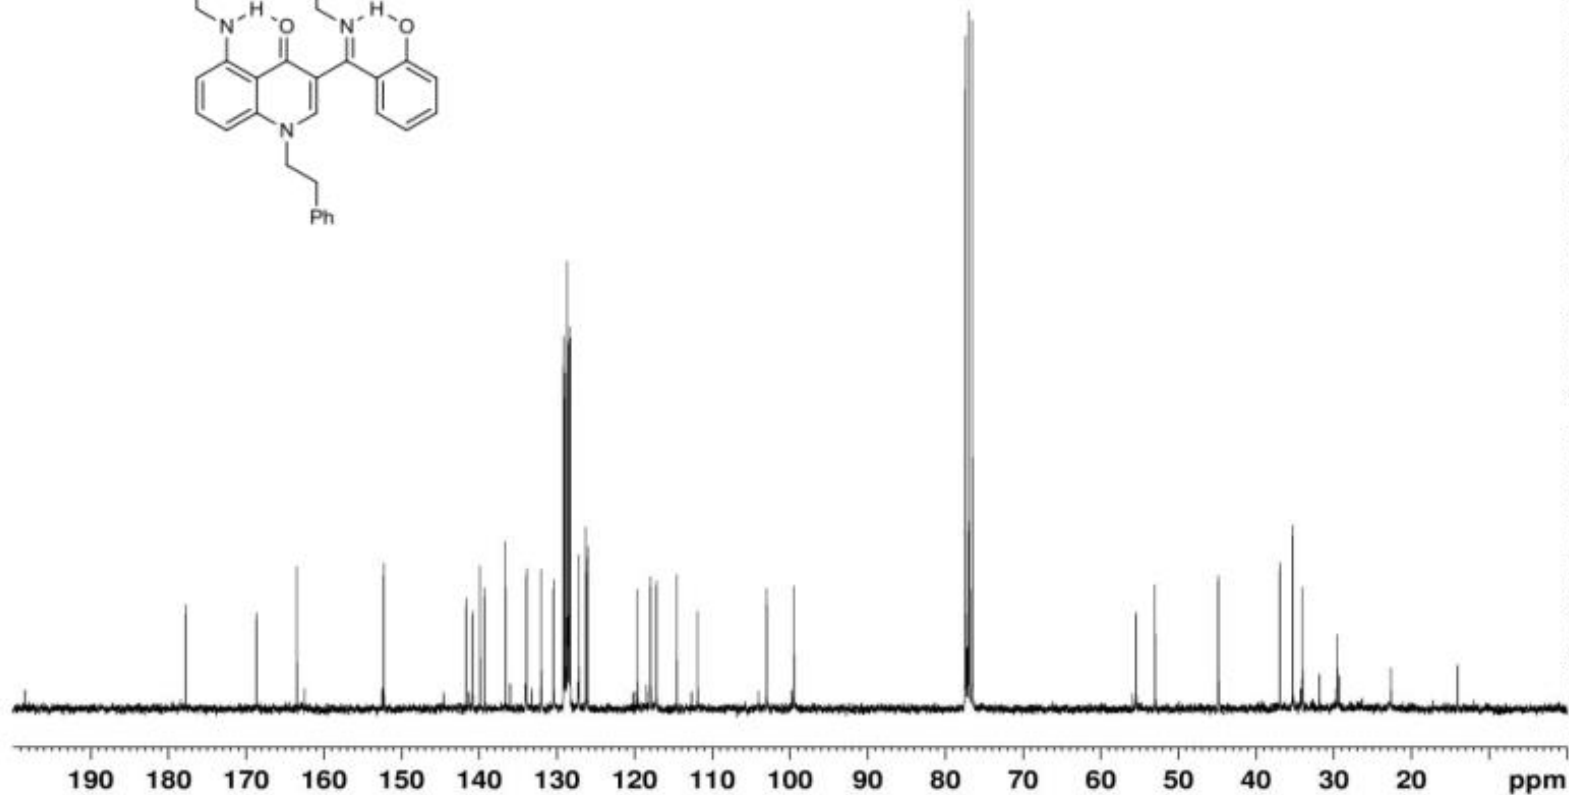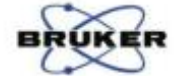

Current Data Param  
 NAME 130823.u32  
 EXPNO 10  
 PROCNO 1

F2 - Acquisition Para  
 Date\_ 2013082  
 Time 18.50  
 INSTRUM spect  
 PROBHD 5 mm PAI  
 PULPROG zgpg  
 TD 65536  
 SOLVENT CDCl  
 NS 1024  
 DS 4  
 SWH 18028.84  
 FIDRES 0.2750  
 AQ 1.8175816  
 RG 2050  
 DW 27.733  
 DE 10.00 us  
 TE 298.4 K  
 D1 2.0000000  
 D11 0.0300000  
 TD0 1

----- CHANNEL  
 NUC1 13C  
 P1 10.00 us  
 PL1 -0.50 dB  
 PL1W 33.25691  
 SFO1 75.47529

----- CHANNEL  
 CPDPRG2 waltz  
 NUC2 1H  
 PCPD2 72.00  
 PL2 0 dB  
 PL12 17.00 c  
 PL13 17.00 c  
 PL2W 11.25325  
 PL12W 0.22453  
 PL13W 0.22453  
 SFO2 300.13120

F2 - Processing para  
 SI 32768  
 SF 75.4677565  
 WDW EM  
 SSB 0  
 LB 1.00 Hz  
 GB 0  
 PC 1.40

# Compound 4n

Mkrtchyan SM835-3 1H DMSO

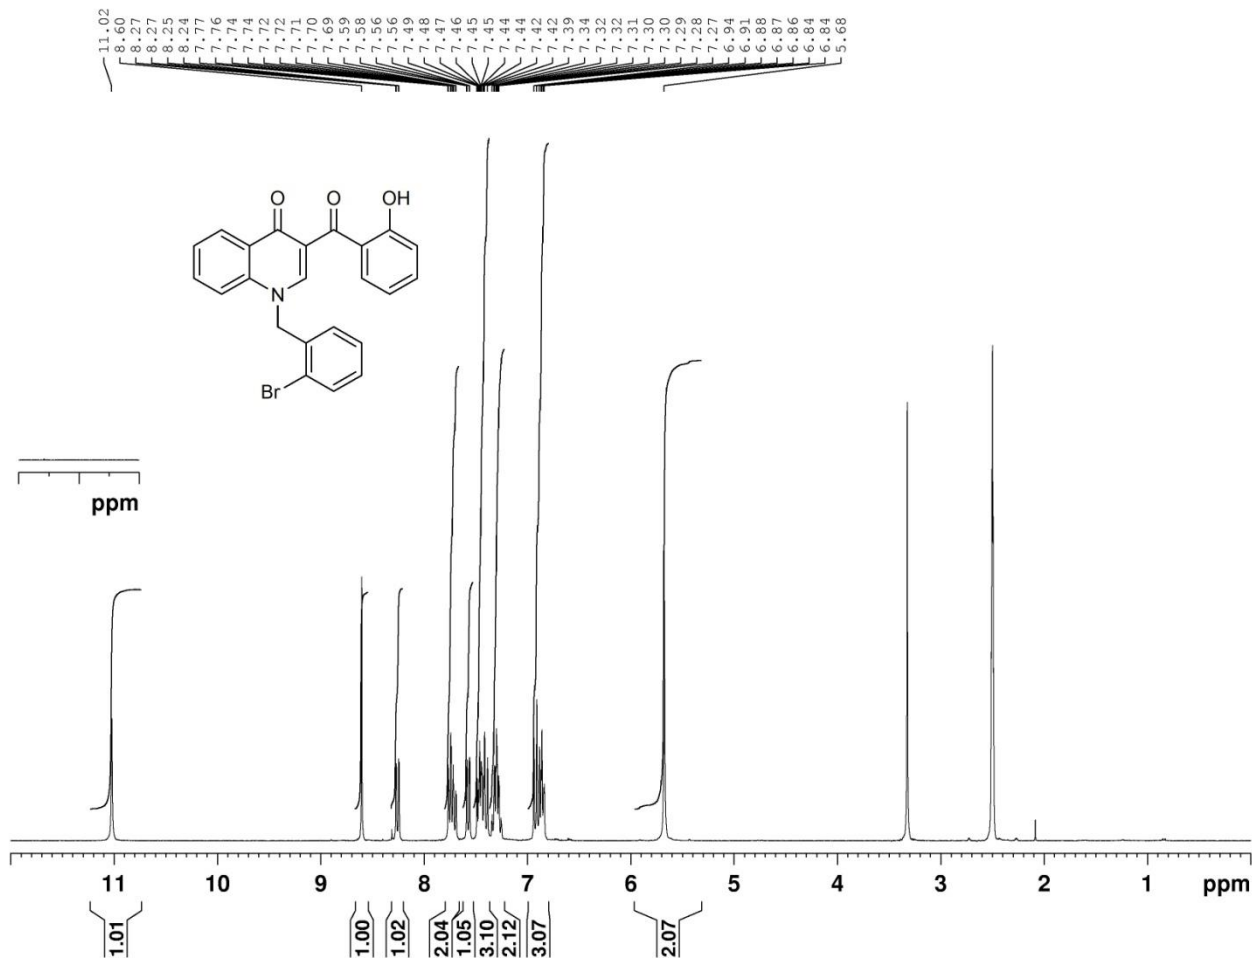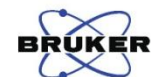

Current Data Parameters  
 NAME 140515.u323 sr  
 EXPNO 10  
 PROCNO 1

F2 - Acquisition Paramet  
 Date\_ 20140515  
 Time 13.35  
 INSTRUM spect  
 PROBHD 5 mm PABBC  
 PULPROG zg30  
 TD 65536  
 SOLVENT DMSO  
 NS 16  
 DS 2  
 SWH 6188.119 Hz  
 FIDRES 0.094423 Hz  
 AQ 5.2953587 sec  
 RG 144  
 DW 80.800 usec  
 DE 10.00 usec  
 TE 298.2 K  
 D1 1.00000000 sec  
 TD0 1

==== CHANNEL f1  
 NUC1 1H  
 P1 10.00 usec  
 PL1 0 dB  
 PL1W 11.25325108  
 SFO1 300.1318534 MHz

F2 - Processing paramet  
 SI 32768  
 SF 300.1300188 MHz  
 WDW EM  
 SSB 0  
 LB 0.30 Hz  
 GB 0  
 PC 1.00



# Compound 4n

Mkrtchyan SM835-3 13C DMSO

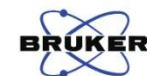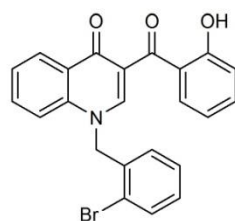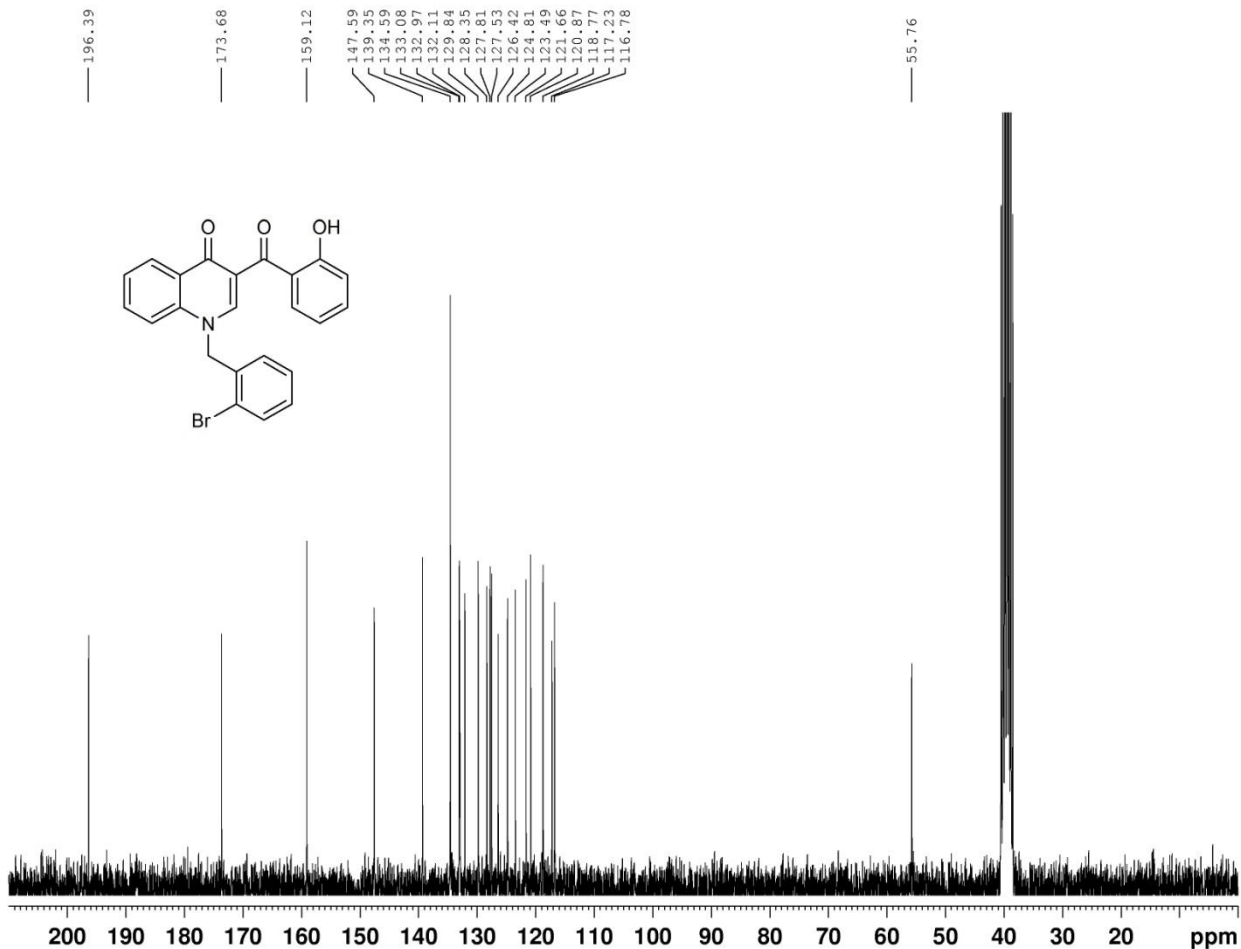

Current Data Parameters  
 NAME 140516.207 sm 8:  
 EXPNO 10  
 PROCNO 1

F2 - Acquisition Parameter:  
 Date\_ 20140516  
 Time 17.31  
 INSTRUM spect  
 PROBHD 5 mm PABBO B  
 PULPROG zgpg30  
 TD 65536  
 SOLVENT DMSO  
 NS 1024  
 DS 4  
 SWH 15000.000 Hz  
 FIDRES 0.228882 Hz  
 AQ 2.1845834 sec  
 RG 2050  
 DW 33.333 usec  
 DE 10.00 usec  
 TE 298.0 K  
 D1 2.0000000 sec  
 d11 0.0300000 sec  
 DELTA 1.8999998 sec  
 TD0 1

==== CHANNEL f1 ==  
 NUC1 13C  
 P1 10.00 usec  
 PL1 -1.00 dB  
 SFO1 62.9015280 MH

==== CHANNEL f2 ==  
 CPDPRG2 waltz16  
 NUC2 1H  
 PCPD2 70.00 usec  
 PL12 15.00 dB  
 PL13 15.00 dB  
 PL2 -2.50 dB  
 SFO2 250.1310005 MH

F2 - Processing parameter:  
 SI 32768  
 SF 62.8952697 MHz  
 WDW EM  
 SSB 0  
 LB 1.00 Hz  
 GB 0  
 PC 1.40



# Compound 4n

Mkrtchyan SM835-3 Dept DMSO

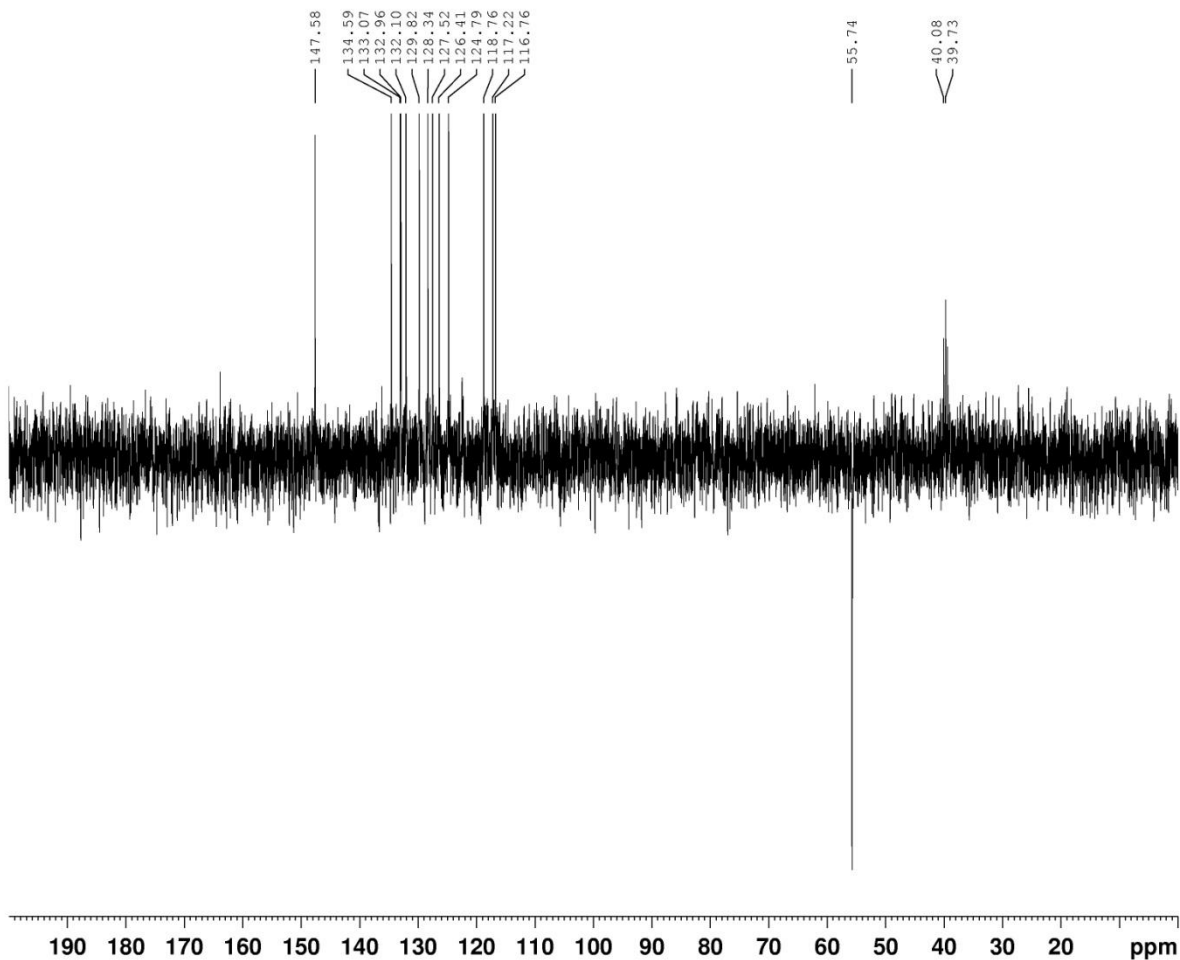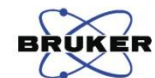

Current Data Parameters  
NAME 4n 140516.207  
EXPNO 11  
PROCNO 1

F2 - Acquisition Parameters  
Date\_ 20140516  
Time\_ 17.50  
INSTRUM spect  
PROBHD 5 mm PABBO BB-  
PULPROG dept135  
TD 65536  
SOLVENT DMSO  
NS 256  
DS 4  
SWH 15000.000 Hz  
FIDRES 0.228882 Hz  
AQ 2.1845834 sec  
RG 2050  
DW 33.333 usec  
DE 10.00 usec  
TE 298.0 K  
CNST2 145.000000  
D1 2.0000000 sec  
d12 0.0000200 sec  
d2 0.00344828 sec  
DELTA 0.00001273 sec  
TD0 1

==== CHANNEL f1 =====  
NUC1 13C  
P1 10.00 usec  
p2 20.00 usec  
PL1 -1.00 dB  
SFO1 62.9015280 MHz

==== CHANNEL f2 =====  
CPDPRG2 waltz16  
NUC2 1H  
P3 10.00 usec  
p4 20.00 usec  
PCPD2 70.00 usec  
PL12 15.00 dB  
PL2 -2.50 dB  
SFO2 250.1310005 MHz

F2 - Processing parameters  
SI 32768  
SF 62.8952704 MHz  
WDW EM  
SSB 0  
LB 1.00 Hz  
GB 0  
PC 1.40

# Compound 4o

Mkrtchyan SM407 1H DMSO

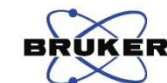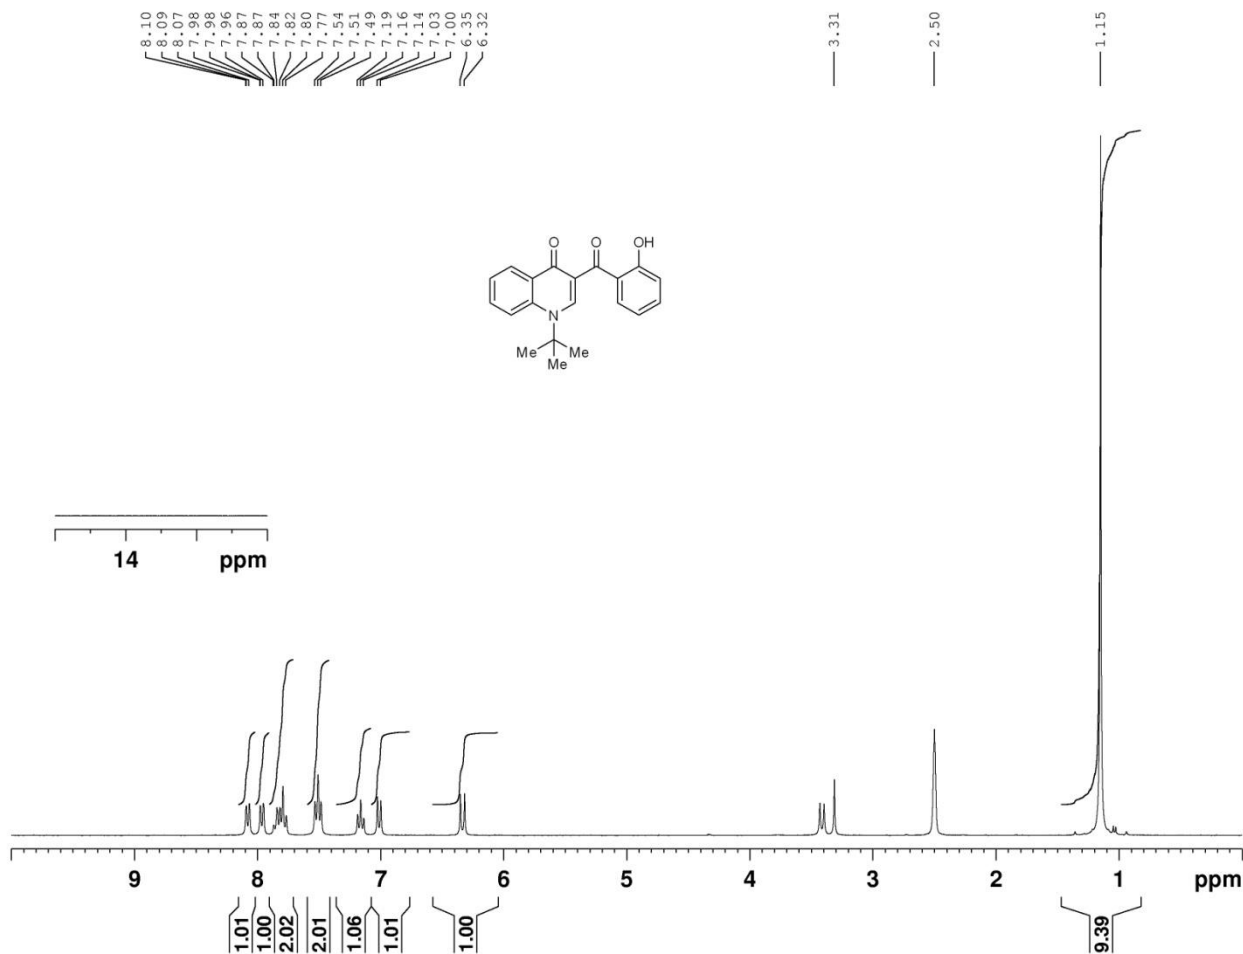

Current Data Parameters  
 NAME 110223.u336 sm  
 EXPNO 10  
 PROCNO 1

F2 - Acquisition Parameters  
 Date\_ 20110223  
 Time 14.08  
 INSTRUM spect  
 PROBHD 5 mm PABBO 1  
 PULPROG zg30  
 TD 65536  
 SOLVENT DMSO  
 NS 16  
 DS 2  
 SWH 6188.119 Hz  
 FIDRES 0.094423 Hz  
 AQ 5.2953587 sec  
 RG 181  
 DW 80.800 usec  
 DE 10.00 usec  
 TE 298.2 K  
 D1 1.0000000 sec  
 TD0 1

===== CHANNEL f1 =====  
 NUC1 1H  
 P1 10.00 usec  
 PL1 0 dB  
 PL1W 11.25325108 W  
 SFO1 300.1318534 M.

F2 - Processing parameters  
 SI 32768  
 SF 300.1300059 MHz  
 WDW EM  
 SSB 0  
 LB 0.30 Hz  
 GB 0  
 PC 1.00

# Compound 4o

Mkrtchyan SM-407 13C DMSO

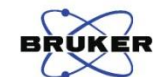

173.38  
155.08  
154.63  
154.43  
134.12  
133.32  
125.23  
124.99  
123.86  
123.65  
120.92  
118.56  
118.35  
115.79  
111.79  
80.07  
49.63  
30.06

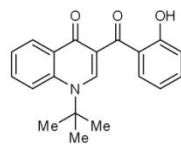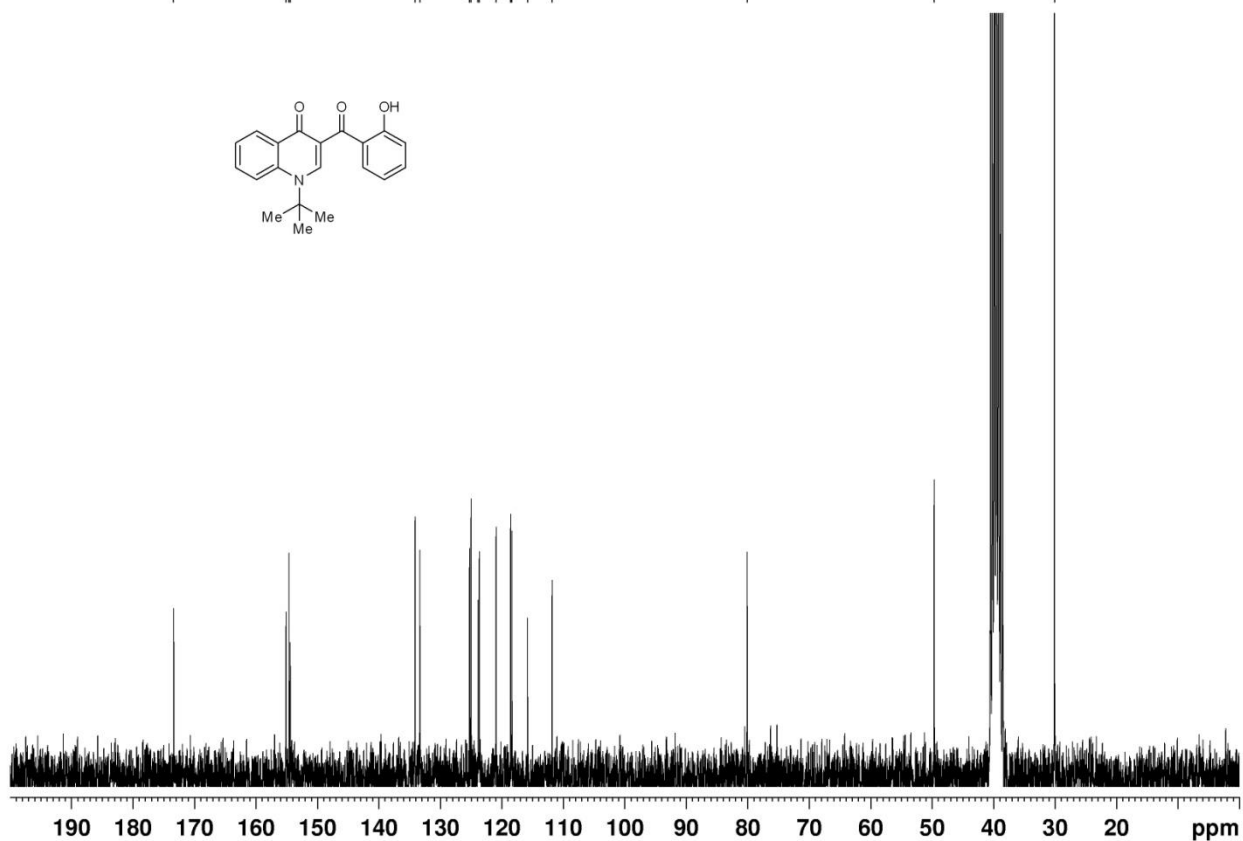

Current Data Parameter:  
NAME 110225.211 sn  
EXPNO 10  
PROCNO 1

F2 - Acquisition Parame  
Date\_ 20110226  
Time\_ 6.18  
INSTRUM spect  
PROBHD 5 mm PABBO  
PULPROG zgpg3c  
TD 65536  
SOLVENT DMSO  
NS 1024  
DS 4  
SWH 15000.000 Hz  
FIDRES 0.228882 Hz  
AQ 2.1845834 sec  
RG 1440  
DW 33.333 usec  
DE 10.00 usec  
TE 297.9 K  
D1 2.00000000 sec  
d11 0.03000000 sec  
DELTA 1.89999998 sec  
TD0 1

===== CHANNEL f1  
NUC1 13C  
P1 10.00 usec  
PL1 -1.00 dB  
SFO1 62.9015280 MHz

===== CHANNEL f2  
CPDPRG2 waltz16  
NUC2 1H  
PCPD2 70.00 usec  
PL12 15.00 dB  
PL13 15.00 dB  
PL2 -2.50 dB  
SFO2 250.1310005 MHz

F2 - Processing parame  
SI 32768  
SF 62.8952696 MHz  
WDW EM  
SSB 0  
LB 1.00 Hz  
GB 0  
PC 1.40

# Compound 4d'

Mkrtchyan SM844 1H CDC13

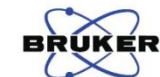

Current Data Parameters  
 NAME SM844 140716.205  
 EXPNO 10  
 PROCNO 1

F2 - Acquisition Parameters  
 Date\_ 20140716  
 Time 11.01  
 INSTRUM spect  
 PROBHD 5 mm PABBO BB-  
 PULPROG zg30  
 TD 65536  
 SOLVENT CDC13  
 NS 16  
 DS 2  
 SWH 5165.289 Hz  
 FIDRES 0.078816 Hz  
 AQ 6.3439350 sec  
 RG 203  
 DW 96.800 usec  
 DE 10.00 usec  
 TE 298.2 K  
 D1 1.00000000 sec  
 TD0 1

===== CHANNEL f1 =====  
 NUC1 1H  
 P1 10.00 usec  
 PL1 -2.50 dB  
 SFO1 250.1315447 MHz

F2 - Processing parameters  
 SI 32768  
 SF 250.1300029 MHz  
 WDW EM  
 SSB 0  
 LB 0.30 Hz  
 GB 0  
 PC 1.00

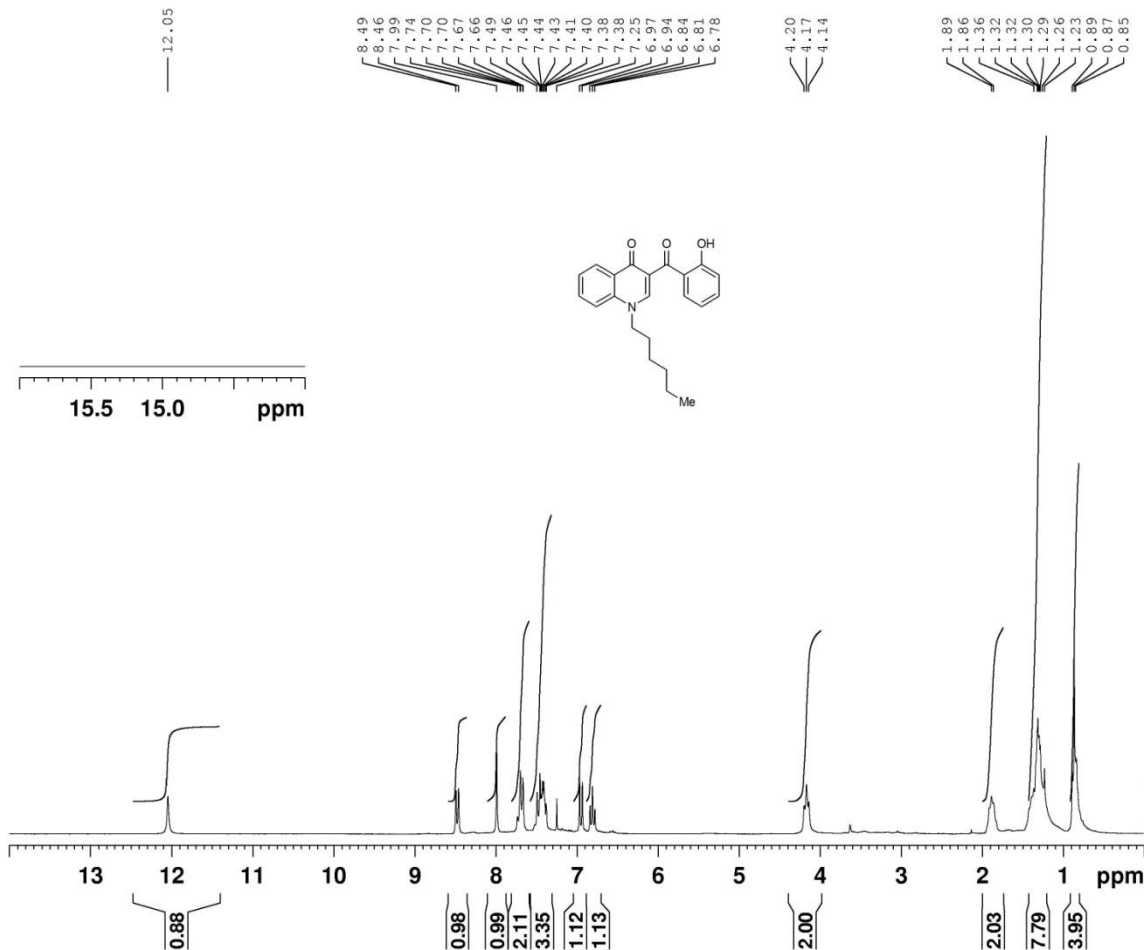

# Compound 4d'

Mkrtchyan SM844 13C CDC13

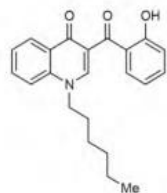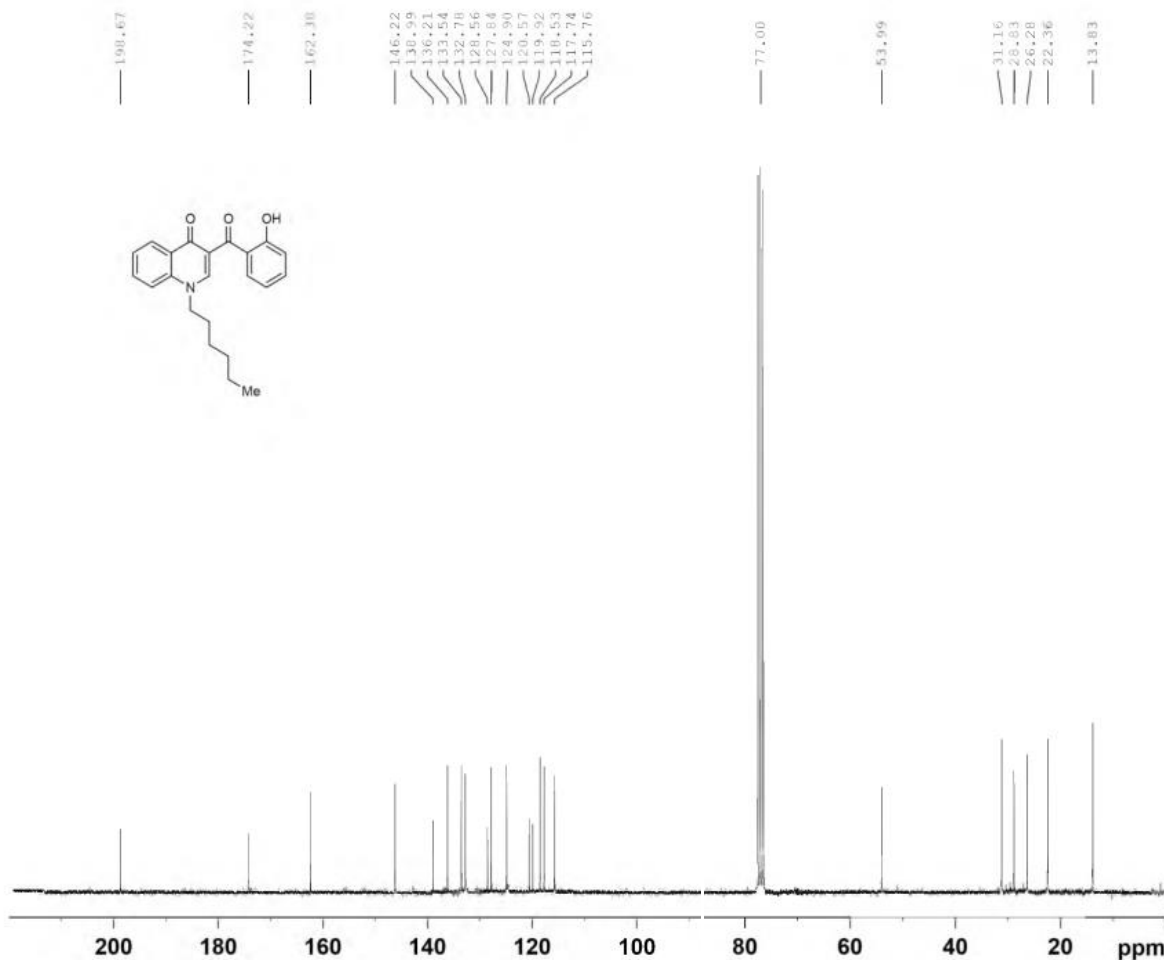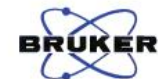

Current Data Parameters  
 NAME SM844 140716.205  
 EXPNO 11  
 PROCNO 1

F2 - Acquisition Parameters  
 Date\_ 20140716  
 Time 12.15  
 INSTRUM spect  
 PROBHD 5 mm PABBO BB-  
 PULPROG zgpg30  
 TD 65536  
 SOLVENT CDCl3  
 NS 1024  
 DS 4  
 SWH 15000.000 Hz  
 FIDRES 0.228882 Hz  
 AQ 2.1845834 sec  
 RG 2050  
 DW 33.333 usec  
 DE 10.00 usec  
 TE 298.0 K  
 D1 2.00000000 sec  
 d11 0.03000000 sec  
 DELTA 1.89999998 sec  
 TD0 1

===== CHANNEL f1 =====  
 NUC1 13C  
 P1 10.00 usec  
 PL1 -1.00 dB  
 SFO1 62.9015280 MHz

===== CHANNEL f2 =====  
 CPDPRG2 waltz16  
 NUC2 1H  
 PCPD2 70.00 usec  
 PL12 15.00 dB  
 PL13 15.00 dB  
 PL2 -2.50 dB  
 SFO2 250.1310005 MHz

F2 - Processing parameters  
 SI 32768  
 SF 62.8952429 MHz  
 WDW EM  
 SSB 0  
 LB 1.00 Hz  
 GB 0  
 PC 1.40

# Compound 5a

Mkrtchyan SM785 1H DMSO

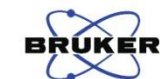

8.08  
8.07  
8.05  
7.93  
7.91  
7.90  
7.88  
7.87  
7.84  
7.84  
7.83  
7.56  
7.55  
7.54  
7.53  
7.52  
7.49  
7.45  
7.42  
7.40  
7.27  
7.27  
7.25  
7.24  
7.22  
7.22  
7.18  
7.14  
7.07  
7.05  
7.04  
6.84  
6.82

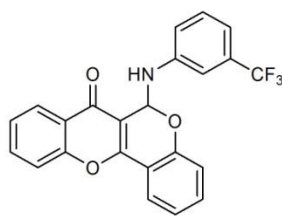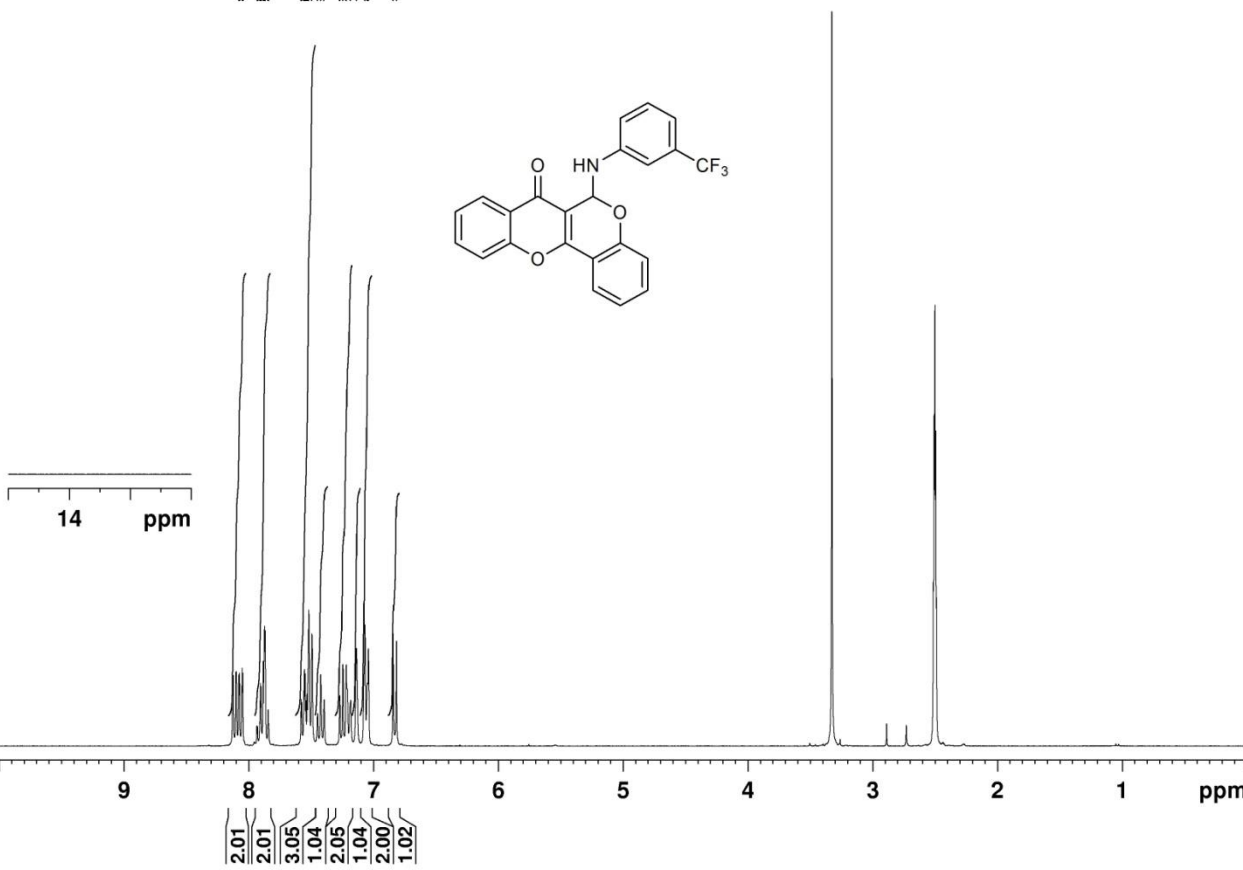

Current Data Parameters  
 NAME 130523.u302 si  
 EXPNO 10  
 PROCNO 1

F2 - Acquisition Parame:  
 Date 20130523  
 Time 9.05  
 INSTRUM spect  
 PROBHD 5 mm PABBC  
 PULPROG zg30  
 TD 65536  
 SOLVENT DMSO  
 NS 16  
 DS 2  
 SWH 6188.119 Hz  
 FIDRES 0.094423 Hz  
 AQ 5.2953587 sec  
 RG 228  
 DW 80.800 usec  
 DE 10.00 usec  
 TE 298.2 K  
 D1 1.00000000 sec  
 TD0 1

==== CHANNEL f1  
 NUC1 1H  
 P1 10.00 usec  
 PL1 0 dB  
 PL1W 11.25325108  
 SFO1 300.1318534

F2 - Processing parame:  
 SI 32768  
 SF 300.130098 MHz  
 WDW EM  
 SSB 0  
 LB 0.30 Hz  
 GB 0  
 PC 1.00

# Compound 5a

Mkrtchyan SM785 13C DMSO

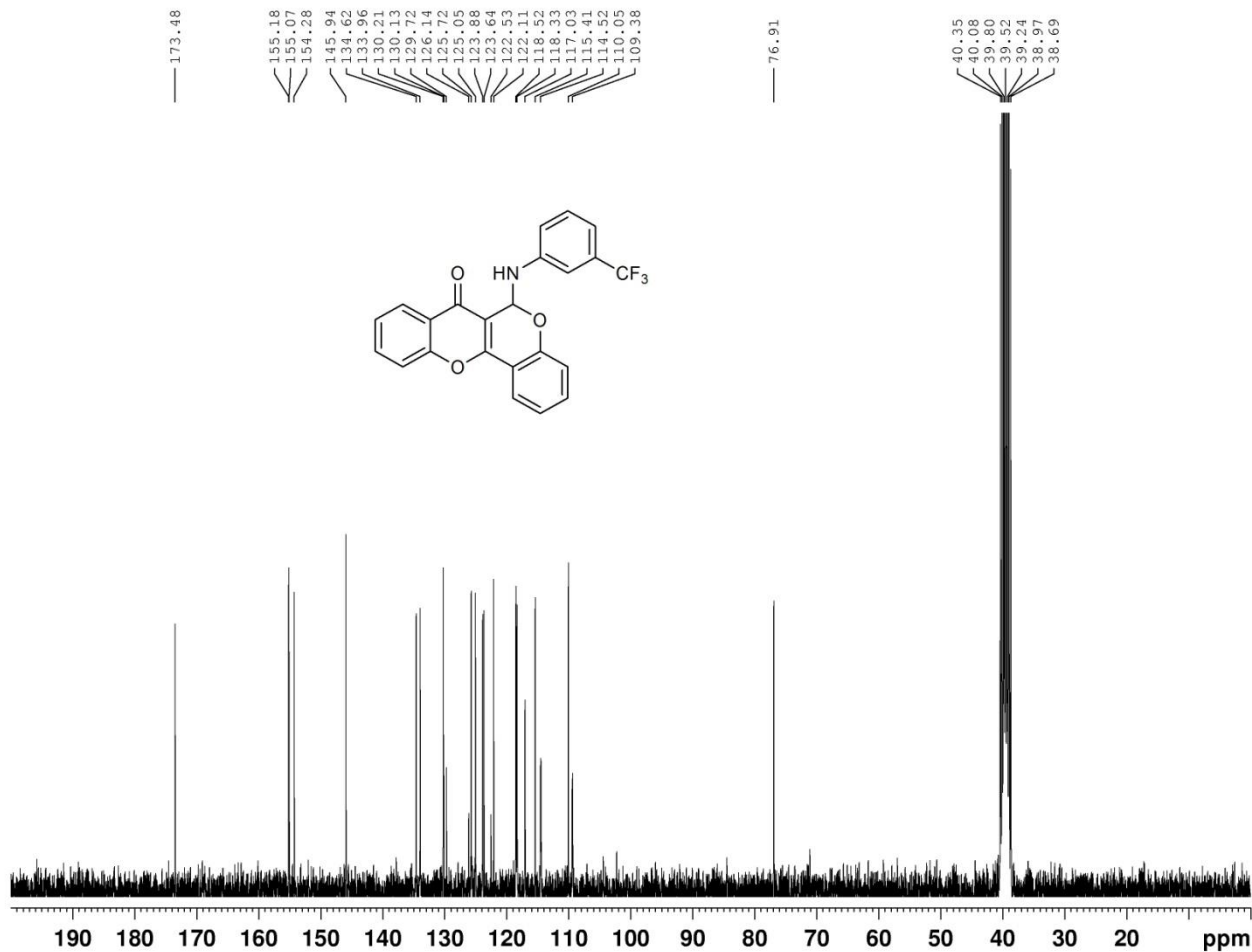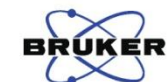

Current Data Parameter  
 NAME 130523.u302 ;  
 EXPNO 12  
 PROCNO 1

F2 - Acquisition Param  
 Date\_ 20130523  
 Time 20.10  
 INSTRUM spect  
 PROBHD 5 mm PABB  
 PULPROG zgpg3i  
 TD 65536  
 SOLVENT DMSO  
 NS 800  
 DS 4  
 SWH 18028.846 ;  
 FIDRES 0.275098  
 AQ 1.8175818 s  
 RG 2050  
 DW 27.733 usec  
 DE 10.00 usec  
 TE 298.2 K  
 D1 2.00000000 s  
 D11 0.03000000 s  
 TD0 1

===== CHANNEL f1  
 NUC1 13C  
 P1 10.00 usec  
 PL1 -0.50 dB  
 PL1W 33.2569198t  
 SFO1 75.4752953

===== CHANNEL f2  
 CPDPRG2 waltz16  
 NUC2 1H  
 PCPD2 72.00 us  
 PL2 0 dB  
 PL12 17.00 dB  
 PL13 17.00 dB  
 PL2W 11.2532510t  
 PL12W 0.2245318;  
 PL13W 0.2245318;  
 SFO2 300.131200t

F2 - Processing param  
 SI 32768  
 SF 75.4677867 M  
 WDW EM  
 SSB 0  
 LB 1.00 Hz  
 GB 0  
 PC 1.40

# Compound 5b

Mkrtchyan SM438 1H DMSO

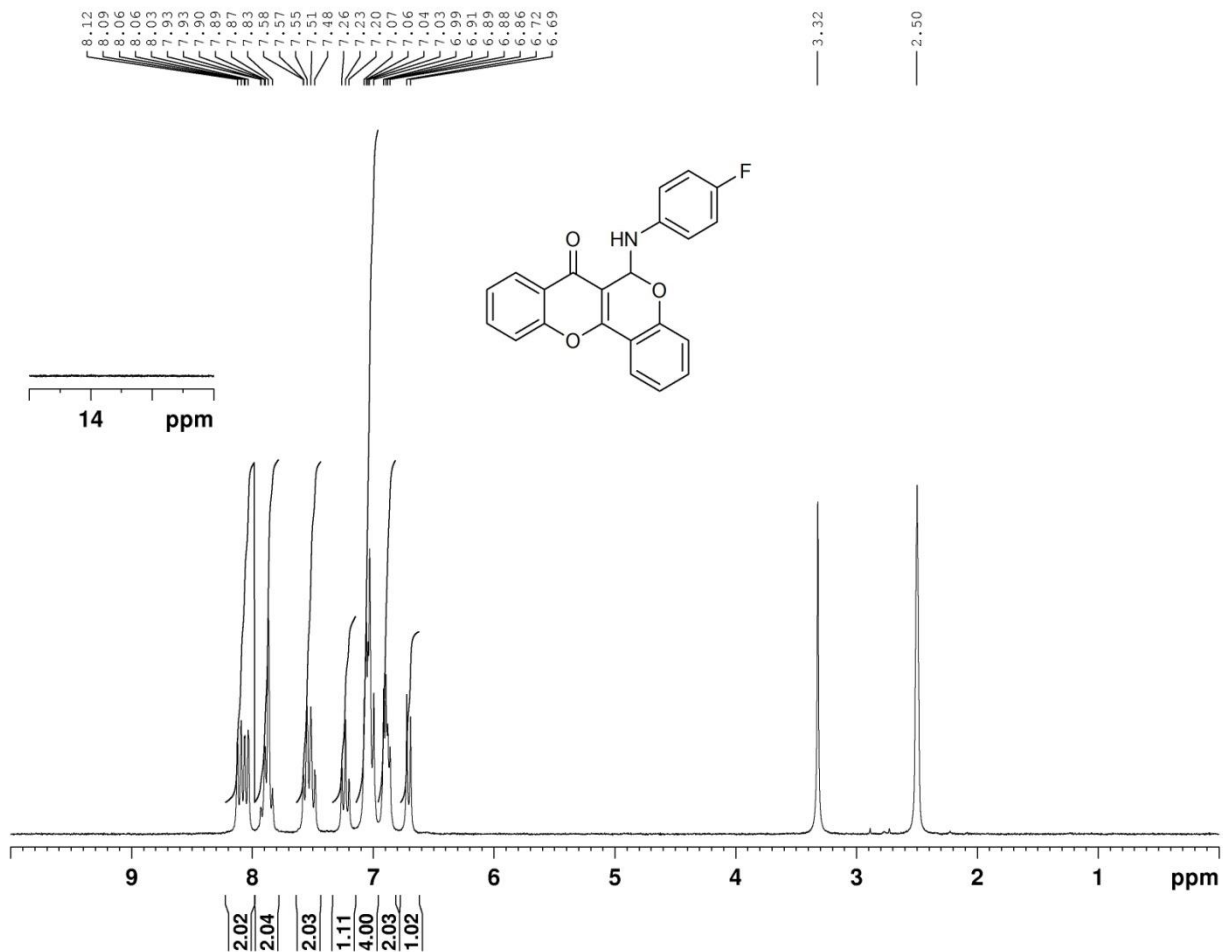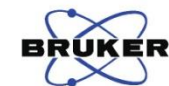

Current Data Parameters  
 NAME 110322.237 sm  
 EXPNO 10  
 PROCNO 1

F2 - Acquisition Paramete  
 Date 20110322  
 Time 15.35  
 INSTRUM spect  
 PROBHD 5 mm PABBO  
 PULPROG zg30  
 TD 65536  
 SOLVENT DMSO  
 NS 16  
 DS 2  
 SWH 5165.289 Hz  
 FIDRES 0.078816 Hz  
 AQ 6.3439350 sec  
 RG 1290  
 DW 96.800 usec  
 DE 10.00 usec  
 TE 298.1 K  
 D1 1.00000000 sec  
 TD0 1

===== CHANNEL f1 =  
 NUC1 1H  
 P1 10.00 usec  
 PL1 -2.50 dB  
 SFO1 250.1315447 M

F2 - Processing paramete  
 SI 32768  
 SF 250.1299983 MHz  
 WDW EM  
 SSB 0  
 LB 0.30 Hz  
 GB 0  
 PC 1.00



# Compound 5b

Mkrtchyan SM438 13C DMSO

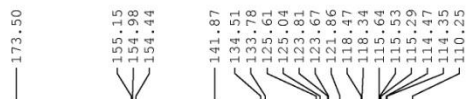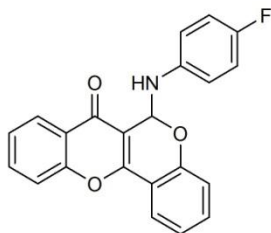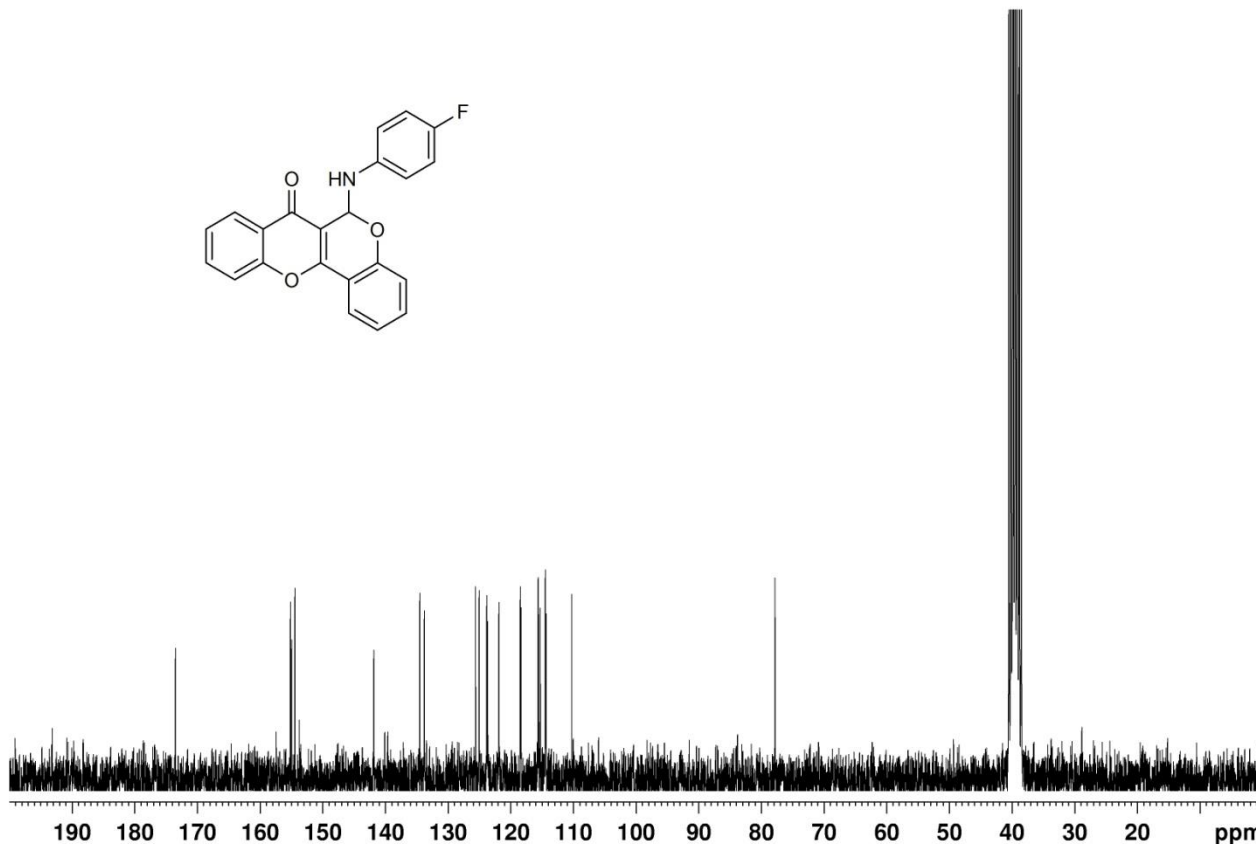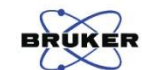

Current Data Parameters  
 NAME 110323.211 s  
 EXPNO 10  
 PROCNO 1

F2 - Acquisition Parameters  
 Date\_ 20110324  
 Time 5.27  
 INSTRUM spect  
 PROBHD 5 mm PAB1  
 PULPROG zgpg3  
 TD 65536  
 SOLVENT DMS  
 NS 1024  
 DS 4  
 SWH 15000.000  
 FIDRES 0.228882  
 AQ 2.1845834 s  
 RG 2050  
 DW 33.333 us  
 DE 10.00 use  
 TE 298.0 K  
 D1 2.00000000 s  
 d11 0.03000000 s  
 DELTA 1.89999999 s  
 TD0 1

===== CHANNEL 1 =====  
 NUC1 13C  
 P1 10.00 use  
 PL1 -1.00 dB  
 SFO1 62.9015286

===== CHANNEL 2 =====  
 CPDPRG2 waltz16  
 NUC2 1H  
 PCPD2 70.00 L  
 PL12 15.00 dE  
 PL13 15.00 dE  
 PL2 -2.50 dB  
 SFO2 250.131000

F2 - Processing parameters  
 SI 32768  
 SF 62.8952697 MHz  
 WDW EM  
 SSB 0  
 LB 1.00 Hz  
 GB 0  
 PC 1.40

# Compound 5b

Mkrtchyan SM438 Dept DMSO

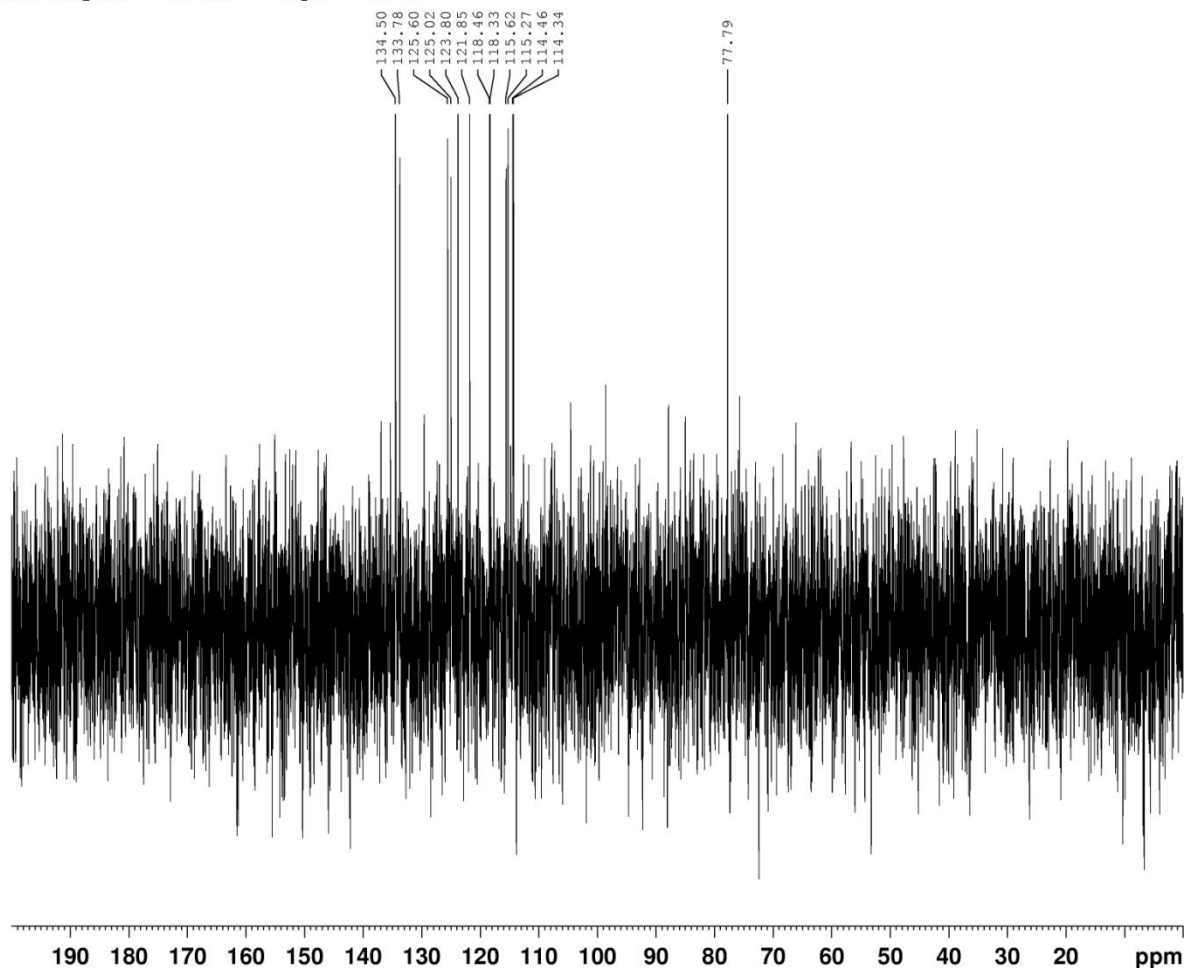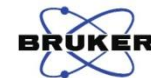

Current Data Parameters  
NAME 5b 110323.211  
EXPNO 11  
PROCNO 1

F2 - Acquisition Parameters  
Date\_ 20110324  
Time 5.47  
INSTRUM spect  
PROBHD 5 mm PABBO BB-  
PULPROG dept135  
TD 65536  
SOLVENT DMSO  
NS 256  
DS 4  
SWH 15000.000 Hz  
FIDRES 0.228882 Hz  
AQ 2.1845834 sec  
RG 2050  
DW 33.333 usec  
DE 10.00 usec  
TE 298.0 K  
CNST2 145.0000000  
D1 2.0000000 sec  
d12 0.0002000 sec  
d2 0.00344828 sec  
DELTA 0.0001273 sec  
TD0 1

===== CHANNEL f1 =====  
NUC1 13C  
P1 10.00 usec  
p2 20.00 usec  
PL1 -1.00 dB  
SFO1 62.9015280 MHz

===== CHANNEL f2 =====  
CPDPRG2 waltz16  
NUC2 1H  
P3 10.00 usec  
p4 20.00 usec  
PCPD2 70.00 usec  
PL12 15.00 dB  
PL2 -2.50 dB  
SFO2 250.1310005 MHz

F2 - Processing parameters  
SI 32768  
SF 62.8952704 MHz  
WDW EM  
SSB 0  
LB 1.00 Hz  
GB 0  
PC 1.40

# Compound 5c

Mkrtchyan SM439 1H DMSO

8.12  
8.09  
8.06  
8.06  
8.03  
8.02  
7.90  
7.89  
7.86  
7.83  
7.57  
7.54  
7.51  
7.48  
7.47  
7.25  
7.22  
7.19  
7.06  
7.03  
6.93  
6.89  
6.74  
6.71  
6.50  
6.39

3.33

2.51  
2.49  
2.19

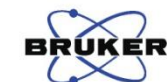

Current Data Parameters  
NAME 110322.238 s  
EXPNO 10  
PROCNO 1

F2 - Acquisition Parameters  
Date\_ 20110322  
Time 15.44  
INSTRUM spect  
PROBHD 5 mm PABE  
PULPROG zg30  
TD 65536  
SOLVENT DMSO  
NS 16  
DS 2  
SWH 5165.289 Hz  
FIDRES 0.078816  
AQ 6.3439350 s  
RG 2050  
DW 96.800 usec  
DE 10.00 usec  
TE 298.1 K  
D1 1.00000000 s  
TD0 1

===== CHANNEL f  
NUC1 1H  
P1 10.00 usec  
PL1 -2.50 dB  
SFO1 250.1315447

F2 - Processing parameters  
SI 32768  
SF 250.1299985 MHz  
WDW EM  
SSB 0  
LB 0.30 Hz  
GB 0  
PC 1.00

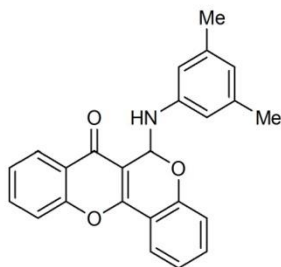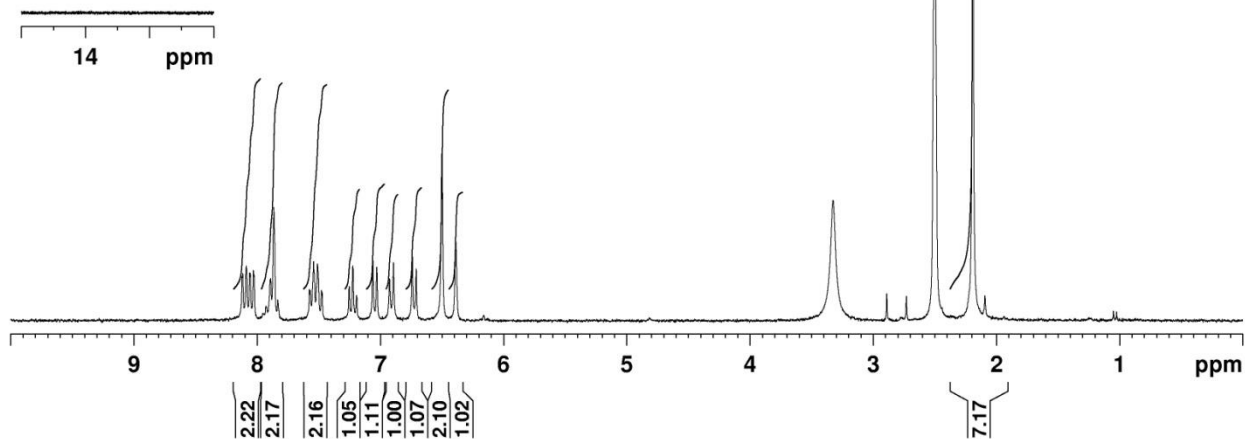

# Compound 5d

Mkrtchyan SM437 1H DMSO

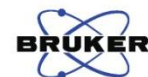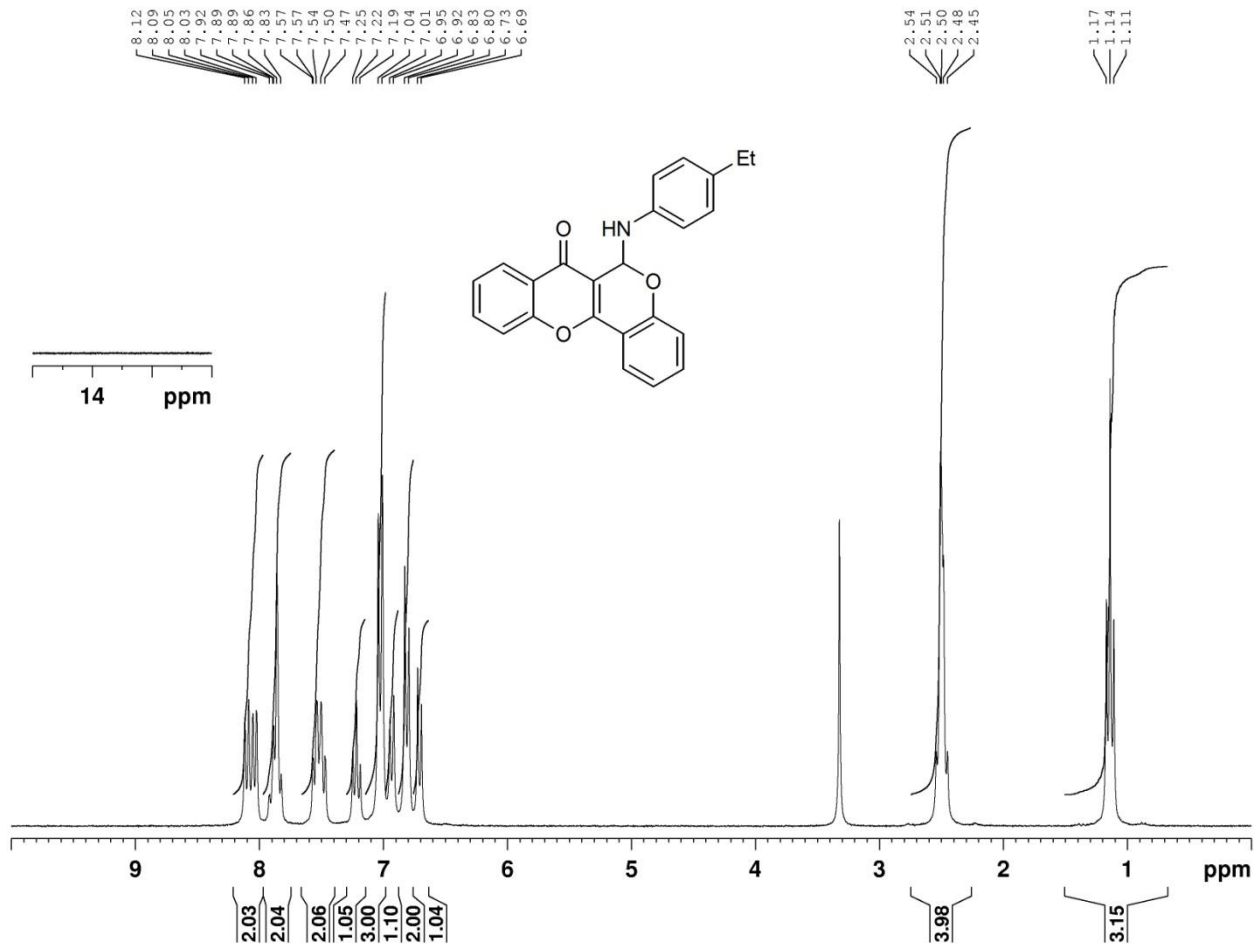

Current Data Parame  
NAME 110322.236  
EXPNO 10  
PROCNO 1

F2 - Acquisition Para  
Date 2011032;  
Time 15.27  
INSTRUM spec  
PROBHD 5 mm PAL  
PULPROG zg.  
TD 65536  
SOLVENT DM  
NS 16  
DS 2  
SWH 5165.288  
FIDRES 0.0788;  
AQ 6.3439350  
RG 645  
DW 96.800 u  
DE 10.00 us  
TE 298.1 K  
D1 1.0000000  
TD0 1

===== CHANNEL  
NUC1 1H  
P1 10.00 us  
PL1 -2.50 dB  
SFO1 250.13154

F2 - Processing para  
SI 32768  
SF 250.129998;  
WDW EM  
SSB 0  
LB 0.30 Hz  
GB 0  
PC 1.00

# Compound 5d

Mkrtchyan SM437 13C DMSO

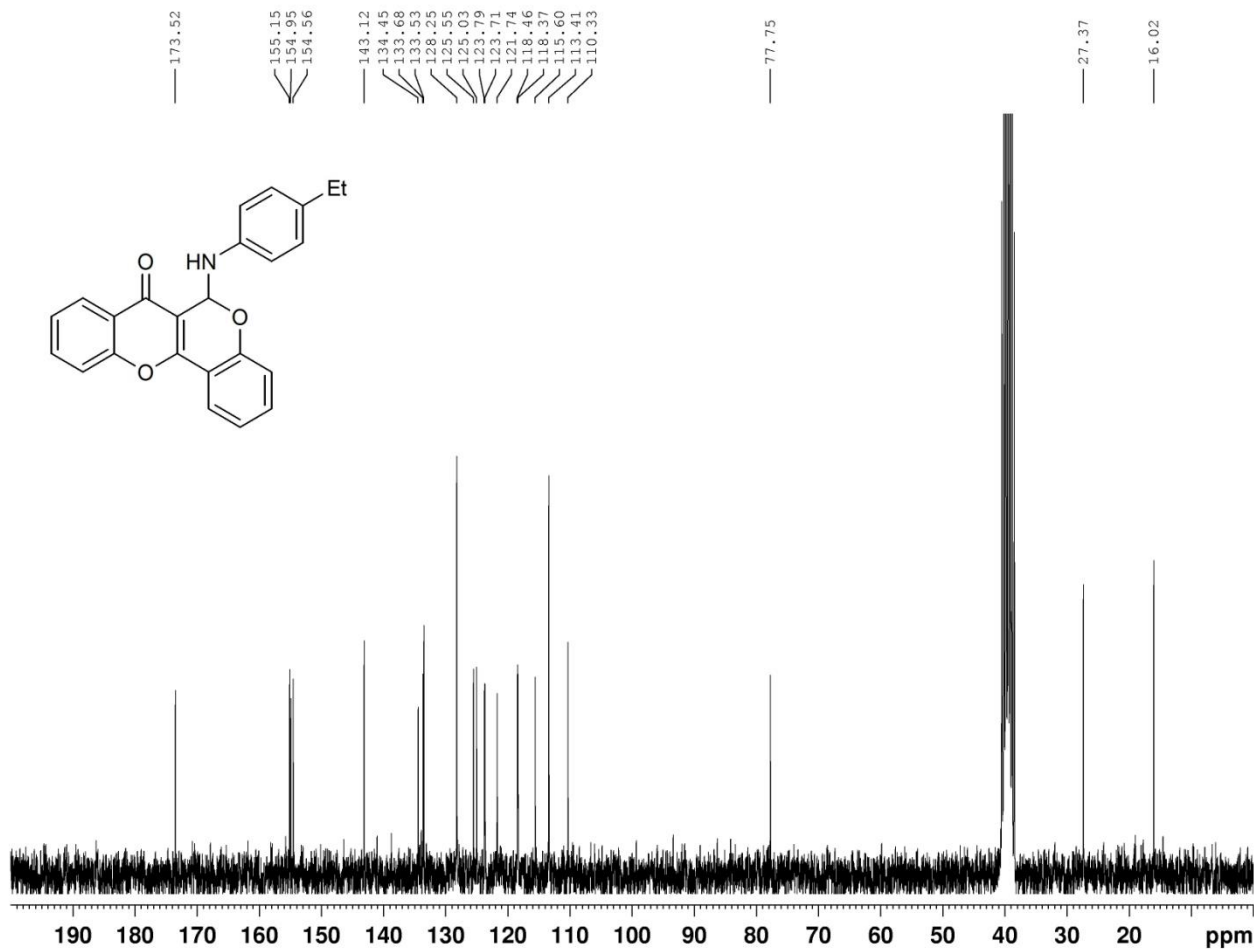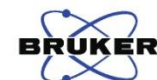

Current Data Paramete  
 NAME 110323.210 s  
 EXPNO 10  
 PROCNO 1

F2 - Acquisition Param  
 Date\_ 20110324  
 Time 3.50  
 INSTRUM spect  
 PROBHD 5 mm PABE  
 PULPROG zgpg3  
 TD 65536  
 SOLVENT DMS  
 NS 1024  
 DS 4  
 SWH 15000.000  
 FIDRES 0.228882  
 AQ 2.1845834 s  
 RG 2050  
 DW 33.333 us  
 DE 10.00 usec  
 TE 297.9 K  
 D1 2.0000000 s  
 d11 0.0300000 s  
 DELTA 1.8999999 s  
 TD0 1

=====  
 CHANNEL f  
 NUC1 13C  
 P1 10.00 usec  
 PL1 -1.00 dB  
 SFO1 62.9015280

=====  
 CHANNEL f  
 CPDPRG2 waltz1t  
 NUC2 1H  
 PCPD2 70.00 u  
 PL12 15.00 dB  
 PL13 15.00 dB  
 PL2 -2.50 dB  
 SFO2 250.131000

F2 - Processing param  
 SI 32768  
 SF 62.8952697 M  
 WDW EM  
 SSB 0  
 LB 1.00 Hz  
 GB 0  
 PC 1.40

# Compound 5e

Mkrtchyan SM-444 1H DMSO

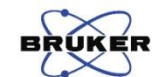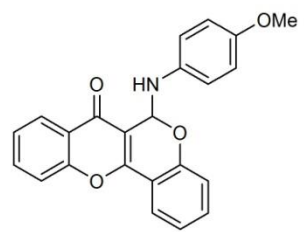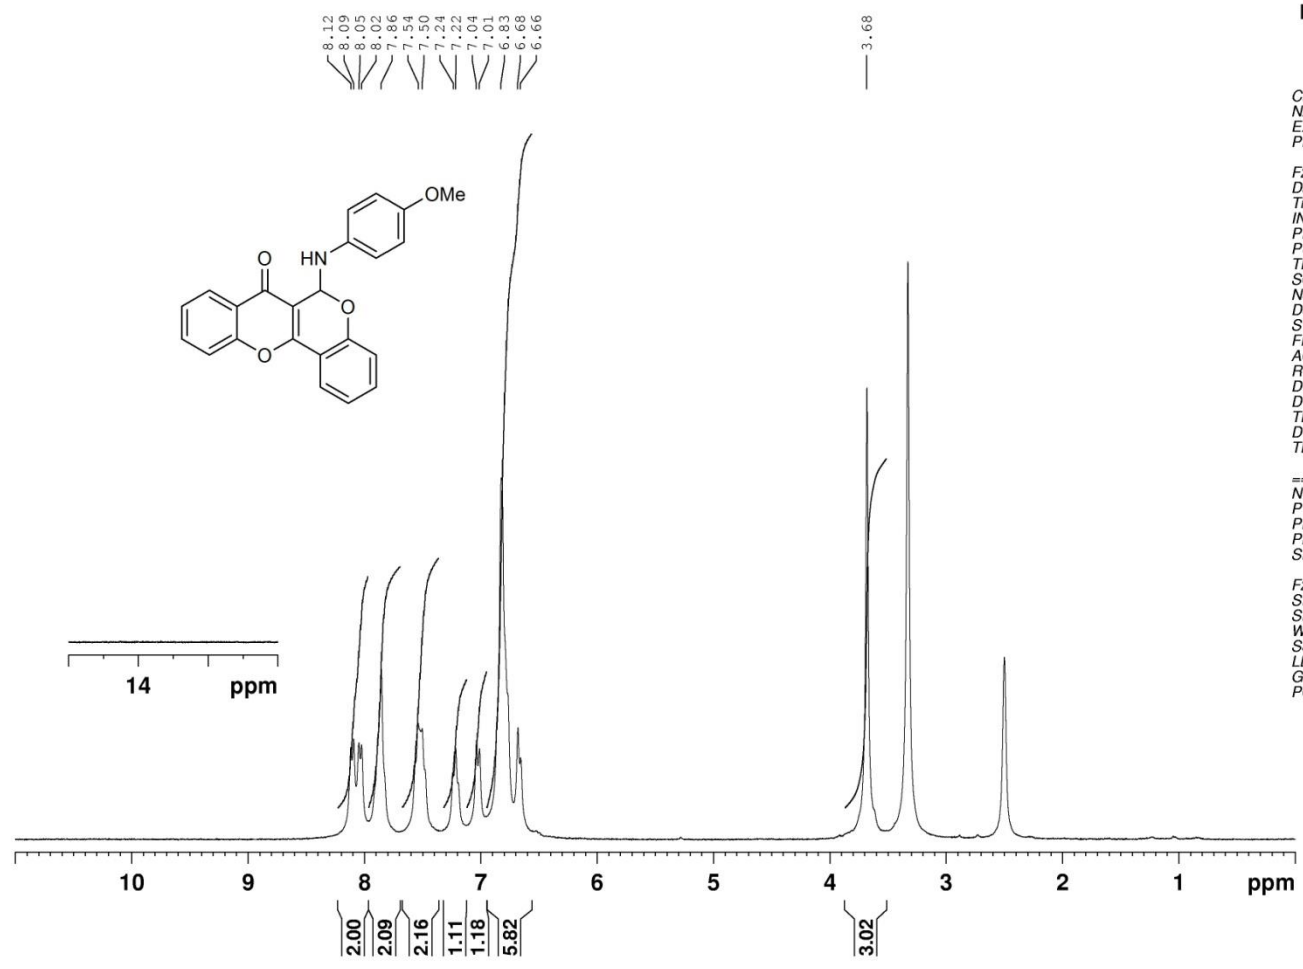

Current Data Paramet  
 NAME\_ 110328.u31-  
 EXPNO 10  
 PROCNO 1

F2 - Acquisition Parar  
 Date\_ 20110326  
 Time\_ 10.47  
 INSTRUM spec  
 PROBHD 5 mm PAE  
 PULPROG zg3  
 TD 65536  
 SOLVENT DMF  
 NS 16  
 DS 2  
 SWH 6188.119  
 FIDRES 0.09442  
 AQ 5.2953587  
 RG 181  
 DW 80.800 u  
 DE 10.00 us  
 TE 298.2 K  
 D1 1.00000000  
 TD0 1

==== CHANNEL  
 NUC1 1H  
 P1 10.00 use  
 PL1 0 dB  
 PL1W 11.253251  
 SFO1 300.13185

F2 - Processing parar  
 SI 32768  
 SF 300.1300112  
 WDW EM  
 SSB 0  
 LB 0.30 Hz  
 GB 0  
 PC 1.00

# Compound 5e

Mkrtchyan SM-444 13C DMSO

173.54  
 155.14  
 154.93  
 154.58  
 152.27  
 139.14  
 134.44  
 133.67  
 125.55  
 123.78  
 123.71  
 121.70  
 118.46  
 118.37  
 115.63  
 114.56  
 114.49  
 110.40  
 78.31  
 55.26

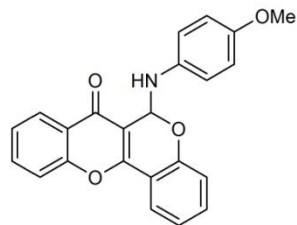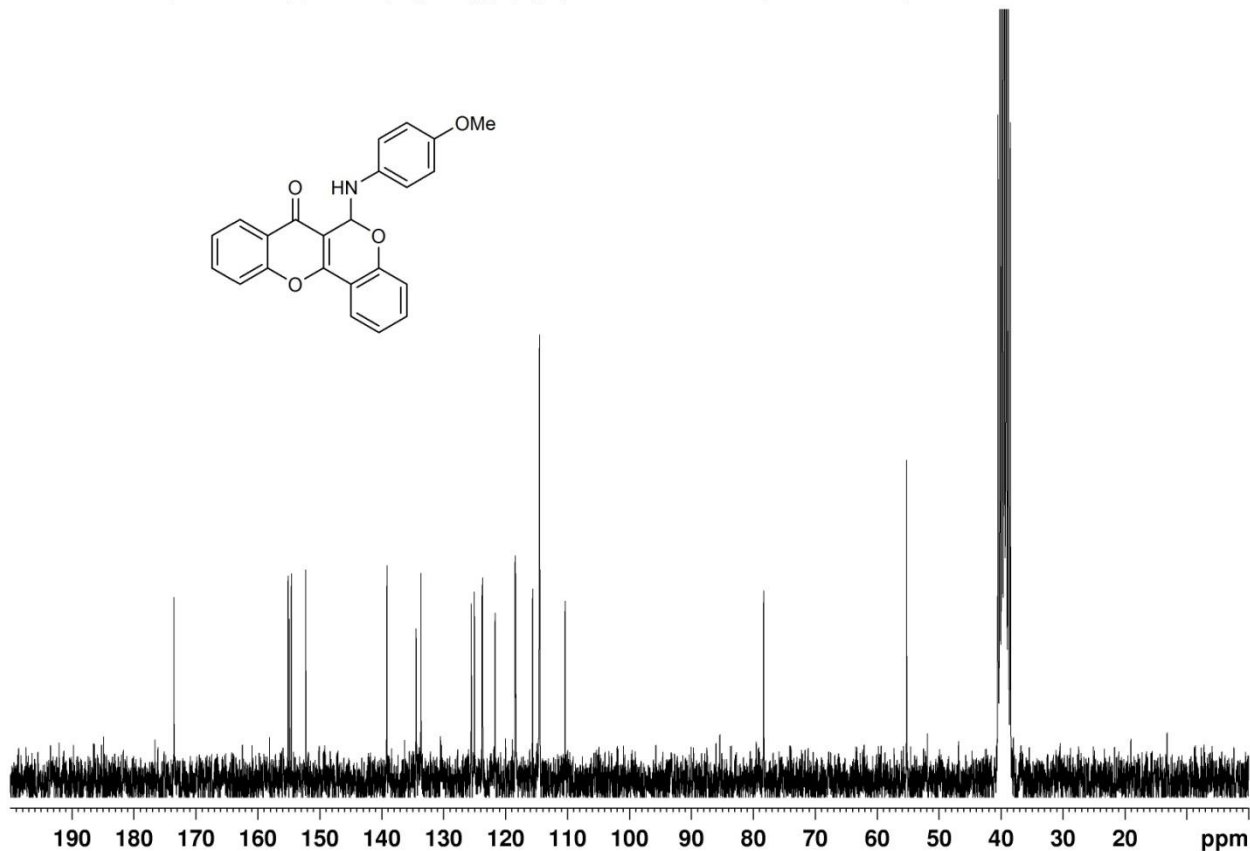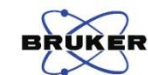

Current Data Parameter  
 NAME 110328.210 sr  
 EXPNO 10  
 PROCNO 1

F2 - Acquisition Param  
 Date\_ 20110328  
 Time 21.32  
 INSTRUM spect  
 PROBHD 5 mm PABB  
 PULPROG zgpg3t  
 TD 65536  
 SOLVENT DMSO  
 NS 1024  
 DS 4  
 SWH 15000.000 I  
 FIDRES 0.228882  
 AQ 2.1845834 se  
 RG 2050  
 DW 33.333 usec  
 DE 10.00 usec  
 TE 298.1 K  
 D1 2.0000000 s  
 d11 0.0300000 s  
 DELTA 1.8999999e  
 TD0 1

===== CHANNEL f1:  
 NUC1 13C  
 P1 10.00 usec  
 PL1 -1.00 dB  
 SFO1 62.9015280

===== CHANNEL f2:  
 CPDPRG2 waltz16  
 NUC2 1H  
 PCPD2 70.00 us  
 PL12 15.00 dB  
 PL13 15.00 dB  
 PL2 -2.50 dB  
 SFO2 250.1310005

F2 - Processing param  
 SI 32768  
 SF 62.8952692 M  
 WDW EM  
 SSB 0  
 LB 1.00 Hz  
 GB 0  
 PC 1.40

# Compound 5e

Mkrtchyan SM-444 Dept DMSO

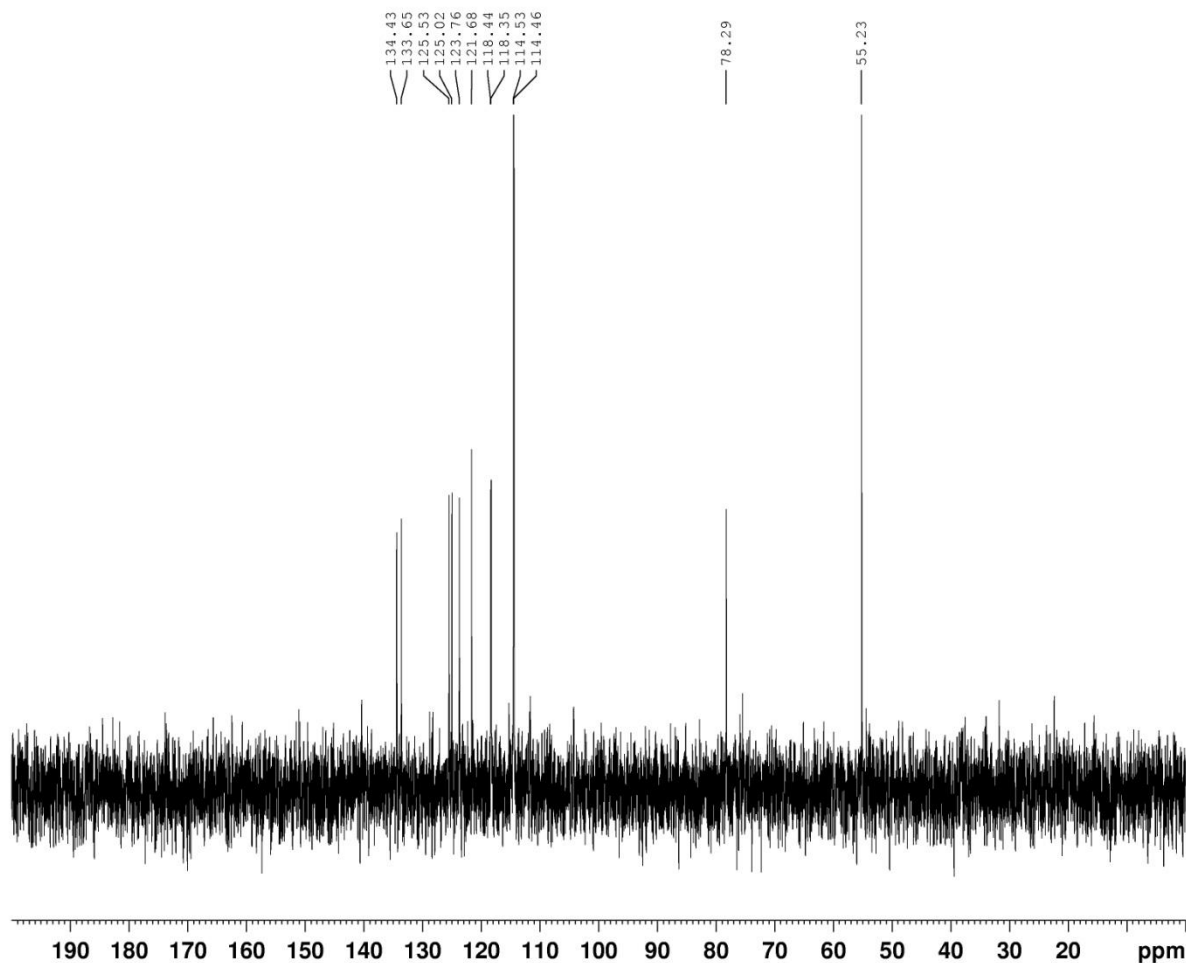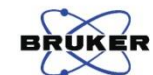

Current Data Parameters  
NAME 5e 110328.210  
EXPNO 11  
PROCNO 1

F2 - Acquisition Parameters  
Date\_ 20110328  
Time\_ 21.51  
INSTRUM spect  
PROBHD 5 mm PABBO BB-  
PULPROG dept135  
TD 65536  
SOLVENT DMSO  
NS 256  
DS 4  
SWH 15000.000 Hz  
FIDRES 0.228882 Hz  
AQ 2.1845834 sec  
RG 2050  
DW 33.333 usec  
DE 10.00 usec  
TE 298.0 K  
CNST2 145.0000000  
D1 2.00000000 sec  
d12 0.00002000 sec  
d2 0.00344828 sec  
DELTA 0.00001273 sec  
TD0 1

===== CHANNEL f1 =====  
NUC1 13C  
P1 10.00 usec  
p2 20.00 usec  
PL1 -1.00 dB  
SFO1 62.9015280 MHz

===== CHANNEL f2 =====  
CPDPRG2 waltz16  
NUC2 1H  
P3 10.00 usec  
p4 20.00 usec  
PCPD2 70.00 usec  
PL12 15.00 dB  
PL2 -2.50 dB  
SFO2 250.1310005 MHz

F2 - Processing parameters  
SI 32768  
SF 62.8952704 MHz  
WDW EM  
SSB 0  
LB 1.00 Hz  
GB 0  
PC 1.40



# Compound 5f

Mkrtchyan SM440 1H DMSO

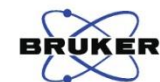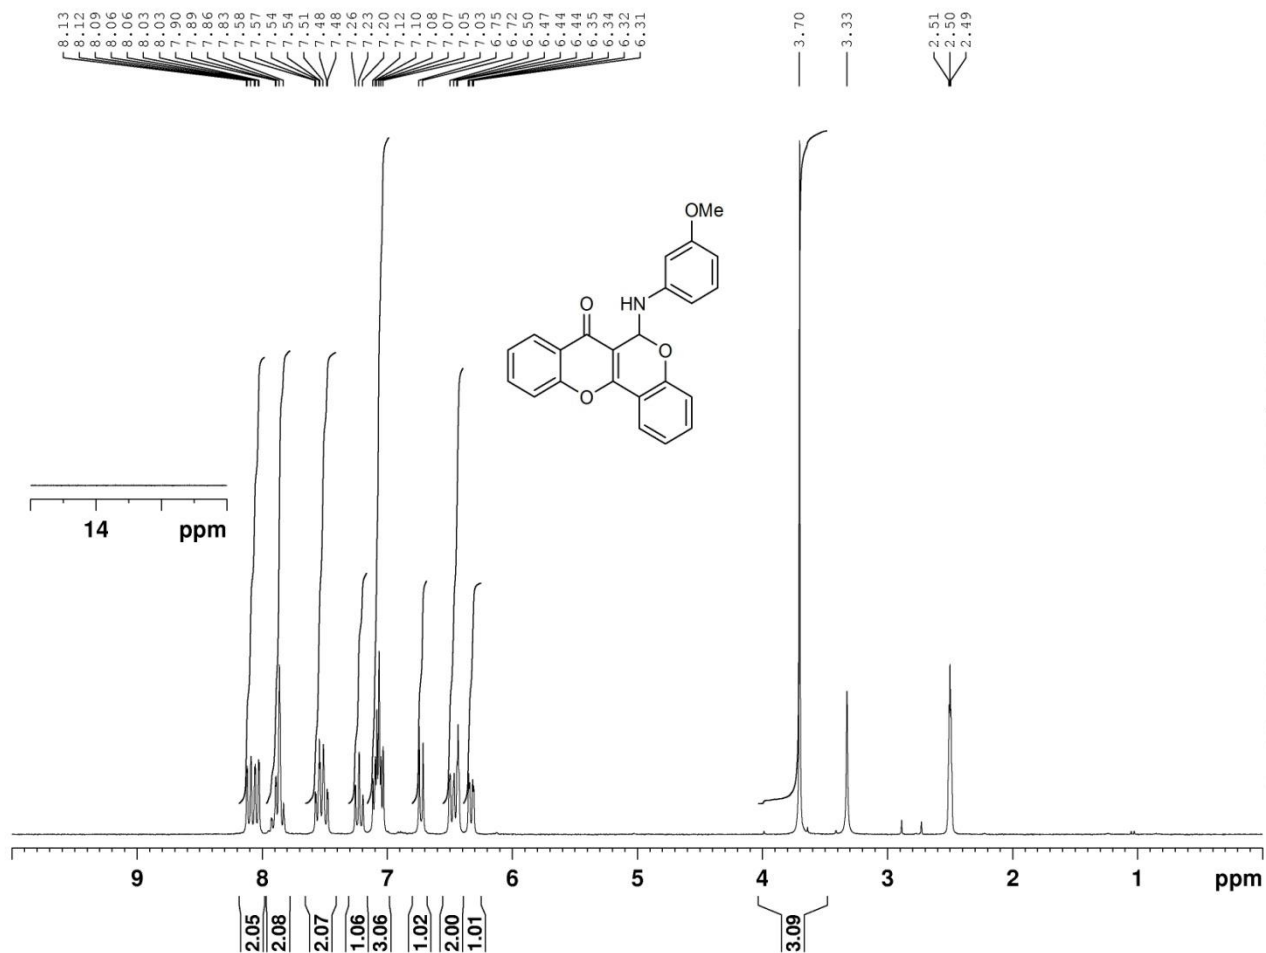

Current Data Param  
 NAME 110322.238  
 EXPNO 10  
 PROCNO 1

F2 - Acquisition Par  
 Date\_ 2011032  
 Time 15.52  
 INSTRUM spe  
 PROBHD 5 mm PA  
 PULPROG zg  
 TD 65536  
 SOLVENT D<sub>2</sub>O  
 NS 16  
 DS 2  
 SWH 5165.28  
 FIDRES 0.0788  
 AQ 6.343935L  
 RG 724  
 DW 96.800  
 DE 10.00 u  
 TE 298.2 K  
 D1 1.000000L  
 TD0 1

===== CHANNE  
 NUC1 1H  
 P1 10.00 us  
 PL1 -2.50 d  
 SFO1 250.1315-

F2 - Processing par  
 SI 32768  
 SF 250.129998  
 WDW EM  
 SSB 0  
 LB 0.30 Hz  
 GB 0  
 PC 1.00

# Compound 5f

Mkrtchyan SM440 13C DMSO

173.49  
 160.22  
 155.15  
 155.00  
 154.48  
 146.60  
 134.48  
 133.74  
 129.82  
 125.58  
 125.03  
 123.79  
 123.69  
 121.83  
 118.46  
 118.37  
 115.55  
 110.24  
 106.15  
 103.89  
 99.33  
 77.36  
 54.74

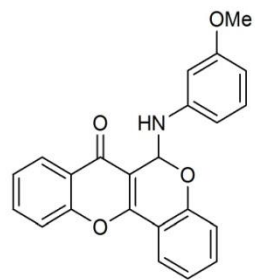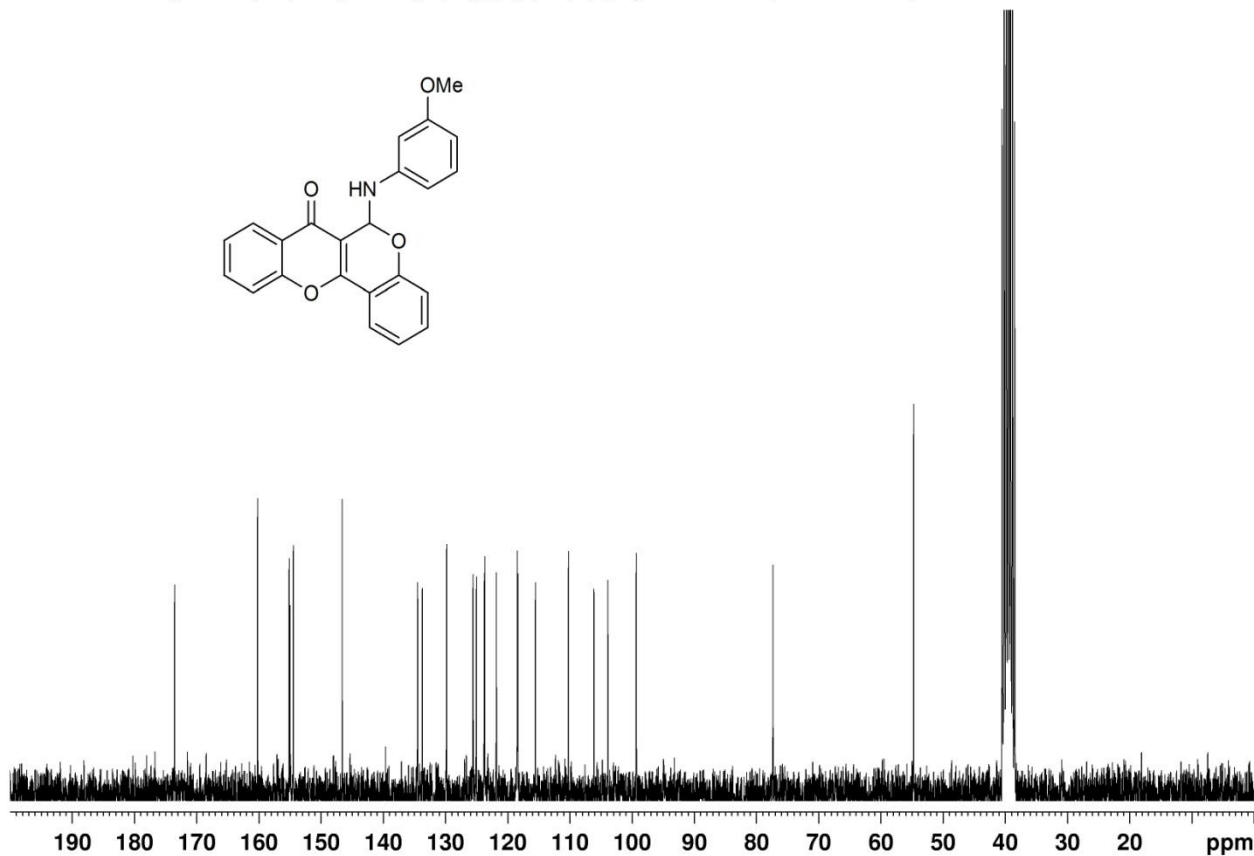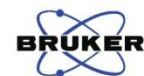

Current Data Parameters  
 NAME 110324.205  
 EXPNO 10  
 PROCNO 1

F2 - Acquisition Parameters  
 Date\_ 2011032  
 Time 15.06  
 INSTRUM spec  
 PROBHD 5 mm PAE  
 PULPROG zgpg  
 TD 65536  
 SOLVENT DM  
 NS 1024  
 DS 4  
 SWH 15000.00  
 FIDRES 0.2288E  
 AQ 2.1845834  
 RG 2050  
 DW 33.333 u  
 DE 10.00 us  
 TE 299.1 K  
 D1 2.0000000  
 d11 0.0300000  
 DELTA 1.899999  
 TDO 1

===== CHANNEL  
 NUC1 13C  
 P1 10.00 us  
 PL1 -1.00 dB  
 SFO1 62.90152E

===== CHANNEL  
 CPDPRG2 waltz  
 NUC2 1H  
 FCPD2 70.00  
 PL12 15.00 dB  
 PL13 15.00 dB  
 PL2 -2.50 dB  
 SFO2 250.13100

F2 - Processing parameters  
 SI 32768  
 SF 62.8952697  
 WDW EM  
 SSB 0  
 LB 1.00 Hz  
 GB 0  
 PC 1.40

# Compound 5g

Mkrtchyan SM455 1H DMSO

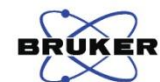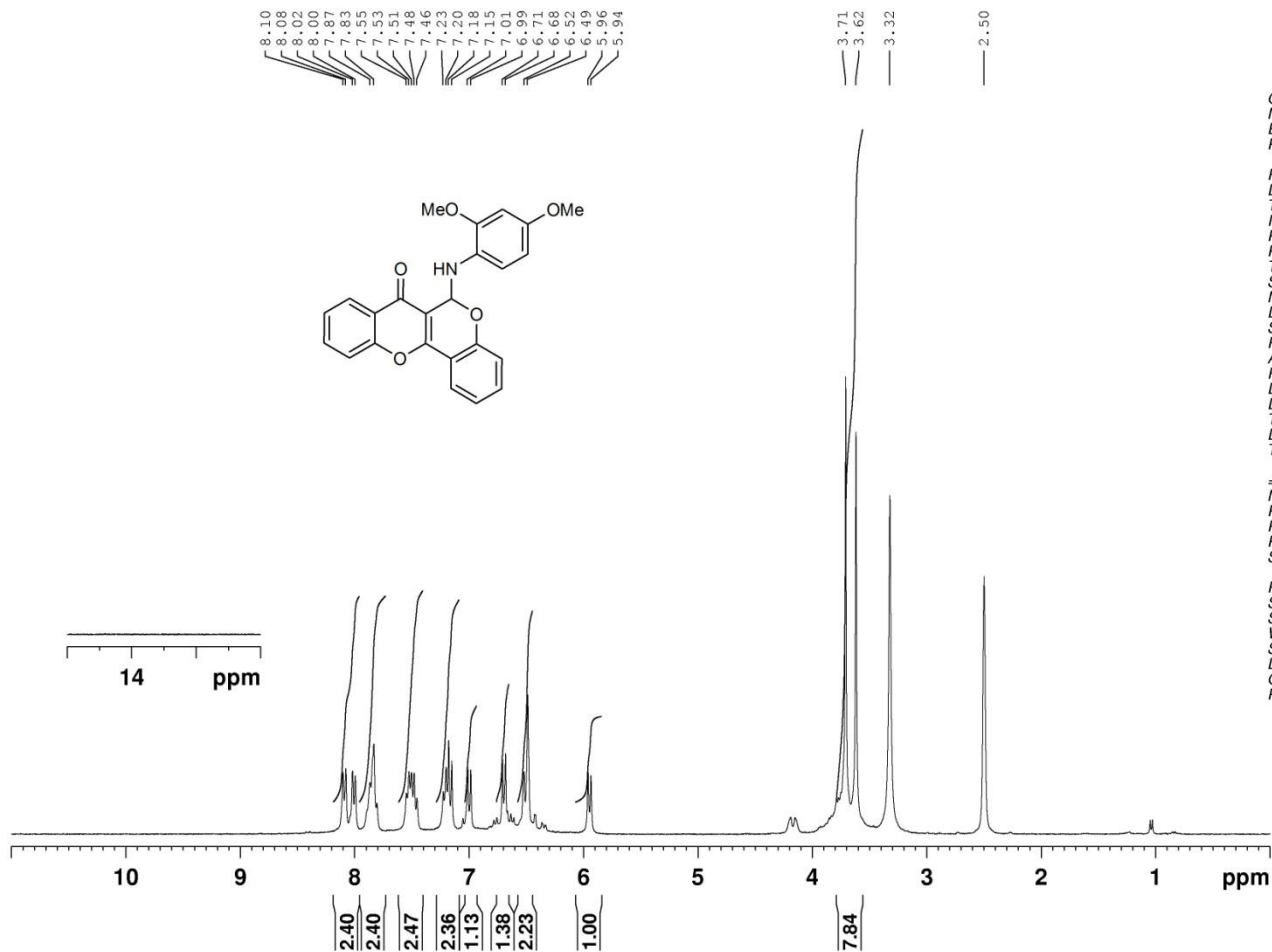

Current Data Parameters  
 NAME 110407.u318 si  
 EXPNO 10  
 PROCNO 1

F2 - Acquisition Paramet  
 Date 20110407  
 Time 11.24  
 INSTRUM spect  
 PROBHD 5 mm PABBC  
 PULPROG zg30  
 TD 65536  
 SOLVENT DMSO  
 NS 16  
 DS 2  
 SWH 6188.119 Hz  
 FIDRES 0.094423 Hz  
 AQ 5.2953587 sec  
 RG 181  
 DW 80.800 usec  
 DE 10.00 usec  
 TE 298.2 K  
 D1 1.00000000 sec  
 TD0 1

==== CHANNEL f1  
 NUC1 1H  
 P1 10.00 usec  
 PL1 0 dB  
 PL1W 11.25325108  
 SFO1 300.1318534 MHz

F2 - Processing paramet  
 SI 32768  
 SF 300.1300079 MHz  
 WDW EM  
 SSB 0  
 LB 0.30 Hz  
 GB 0  
 PC 1.00

# Compound 5g

Mkrtchyan SM-455 13C DMSO

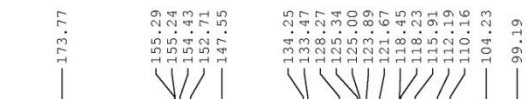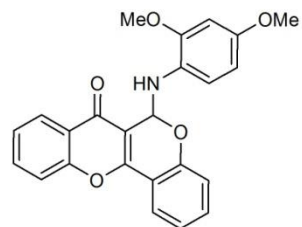

78.08

55.33  
 55.20

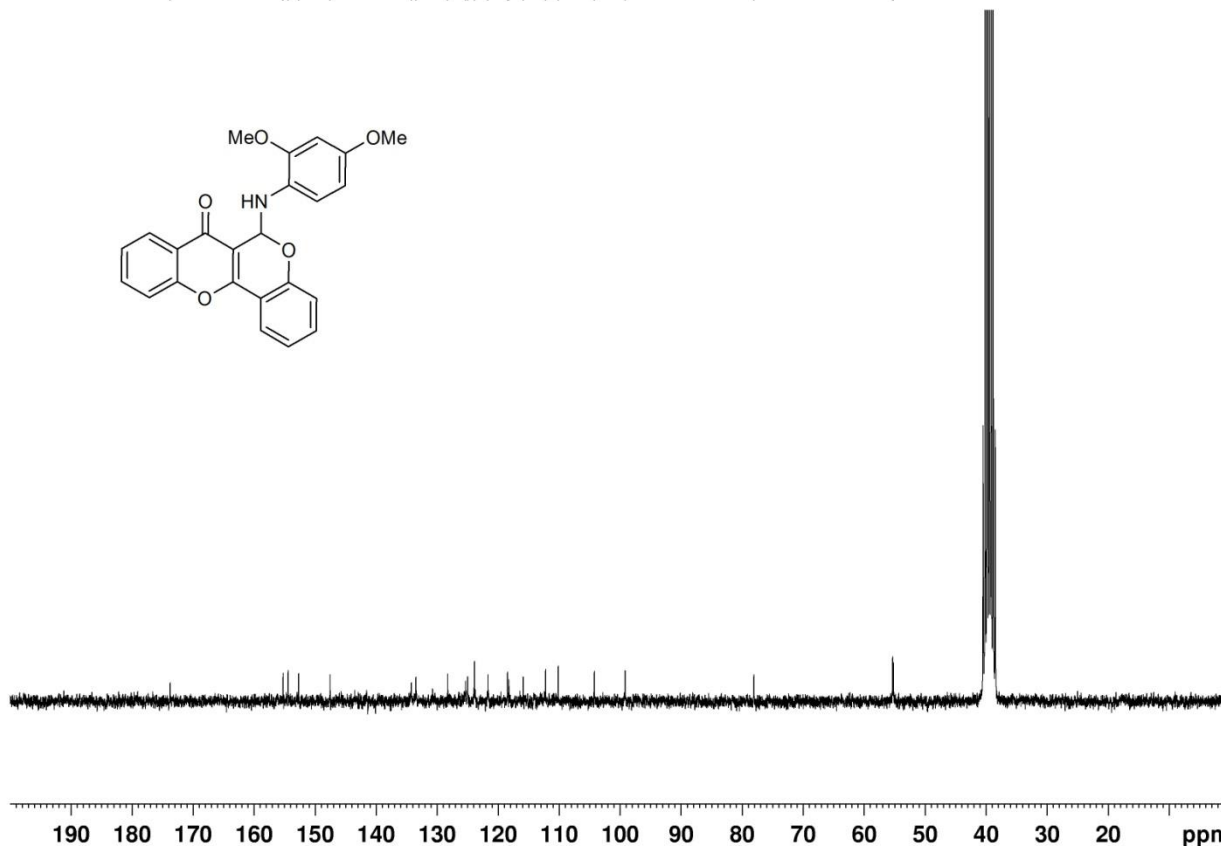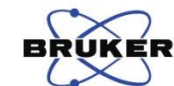

Current Data Parameters  
 NAME 110408.210 sn  
 EXPNO 10  
 PROCNO 1

F2 - Acquisition Paramete  
 Date\_ 20110409  
 Time 1.08  
 INSTRUM spect  
 PROBHD 5 mm PABBO  
 PULPROG zgpg30  
 TD 65536  
 SOLVENT DMSO  
 NS 768  
 DS 4  
 SWH 15000.000 Hz  
 FIDRES 0.228882 Hz  
 AQ 2.1845834 sec  
 RG 2050  
 DW 33.333 usec  
 DE 10.00 usec  
 TE 297.9 K  
 D1 2.00000000 sec  
 d11 0.03000000 sec  
 DELTA 1.89999998  
 TD0 1

===== CHANNEL f1  
 NUC1 13C  
 P1 10.00 usec  
 PL1 -1.00 dB  
 SFO1 62.9015280 MHz

===== CHANNEL f2  
 CPDPRG2 waltz16  
 NUC2 1H  
 PCPD2 70.00 usec  
 PL12 15.00 dB  
 PL13 15.00 dB  
 PL2 -2.50 dB  
 SFO2 250.1310005 MHz

F2 - Processing paramete  
 SI 32768  
 SF 62.8952691 MHz  
 WDW EM  
 SSB 0  
 LB 1.00 Hz  
 GB 0  
 PC 1.40

# Compound 5h

Mkrtchyan SM430 1H DMSO

8.12  
8.10  
8.06  
8.03  
7.87  
7.55  
7.52  
7.25  
7.23  
7.10  
7.08  
6.96  
6.94  
6.76  
6.74  
6.18

3.74  
3.57  
3.32  
2.50

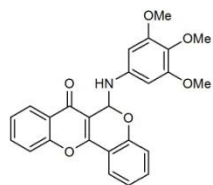

14 ppm

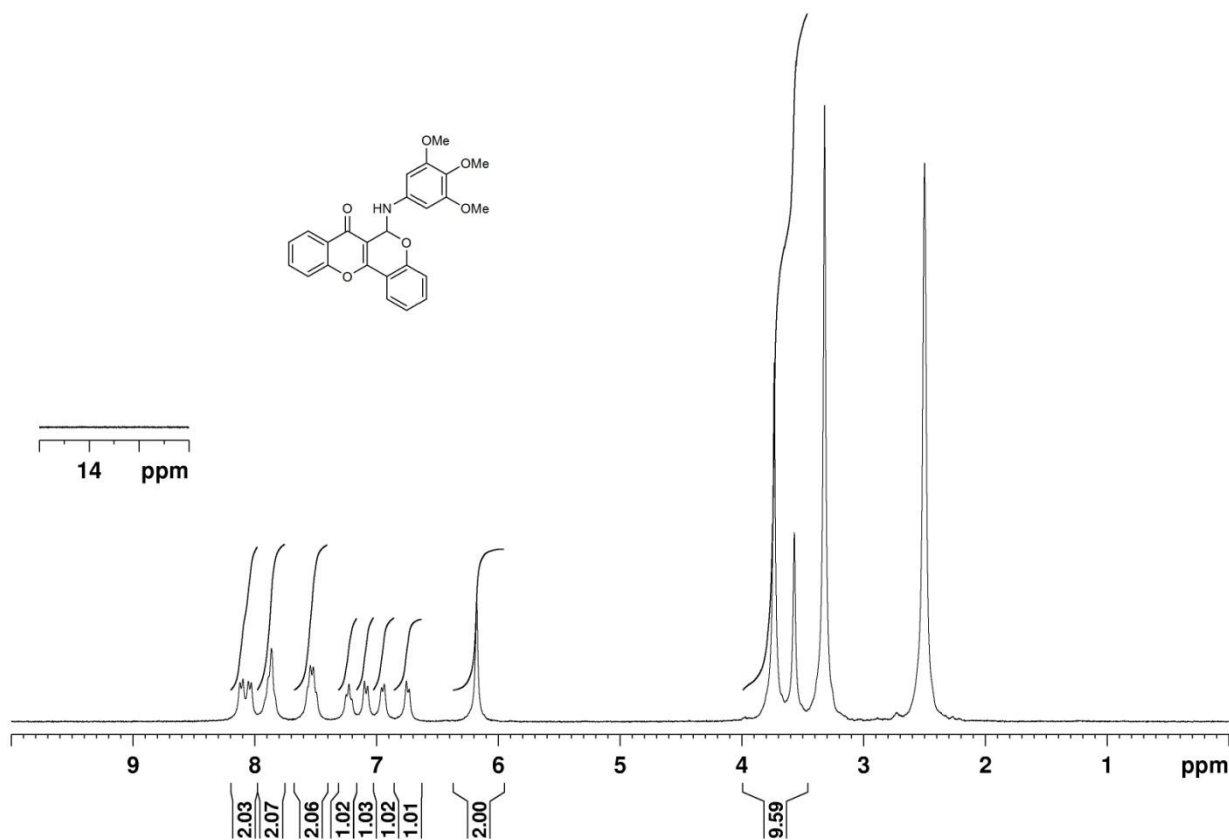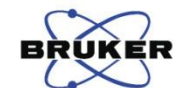

Current Data Parameters  
NAME 130902.u312 s, 43  
EXPNO 10  
PROCNO 1

F2 - Acquisition Parameters  
Date\_ 20130902  
Time 11.33  
INSTRUM spect  
PROBHD 5 mm PABBO BI  
PULPROG zg30  
TD 65536  
SOLVENT DMSO  
NS 16  
DS 2  
SWH 6188.119 Hz  
FIDRES 0.094423 Hz  
AQ 5.2953587 sec  
RG 228  
DW 80.800 usec  
DE 10.00 usec  
TE 298.2 K  
D1 1.00000000 sec  
TD0 1

===== CHANNEL f1 =====  
NUC1 1H  
P1 10.00 usec  
PL1 0 dB  
PL1W 11.25325108 W  
SFO1 300.1318534 MH

F2 - Processing parameters  
SI 32768  
SF 300.1300354 MHz  
WDW EM  
SSB 0  
LB 0.30 Hz  
GB 0  
PC 1.00

# Compound 5i

Mkrtchyan SM451 1H DMSO

8.41  
8.36  
8.16  
8.14  
8.13  
8.12  
8.10  
8.10  
8.02  
7.99  
7.94  
7.92  
7.91  
7.61  
7.61  
7.59  
7.59  
7.58  
7.56  
7.54  
7.51  
7.51  
7.49  
7.47  
7.45  
7.42  
7.40  
7.37  
7.30  
7.27  
7.25  
7.13  
7.10  
7.07  
7.00  
6.98

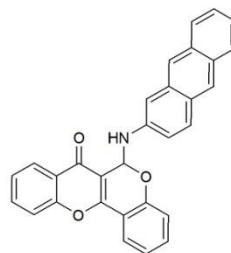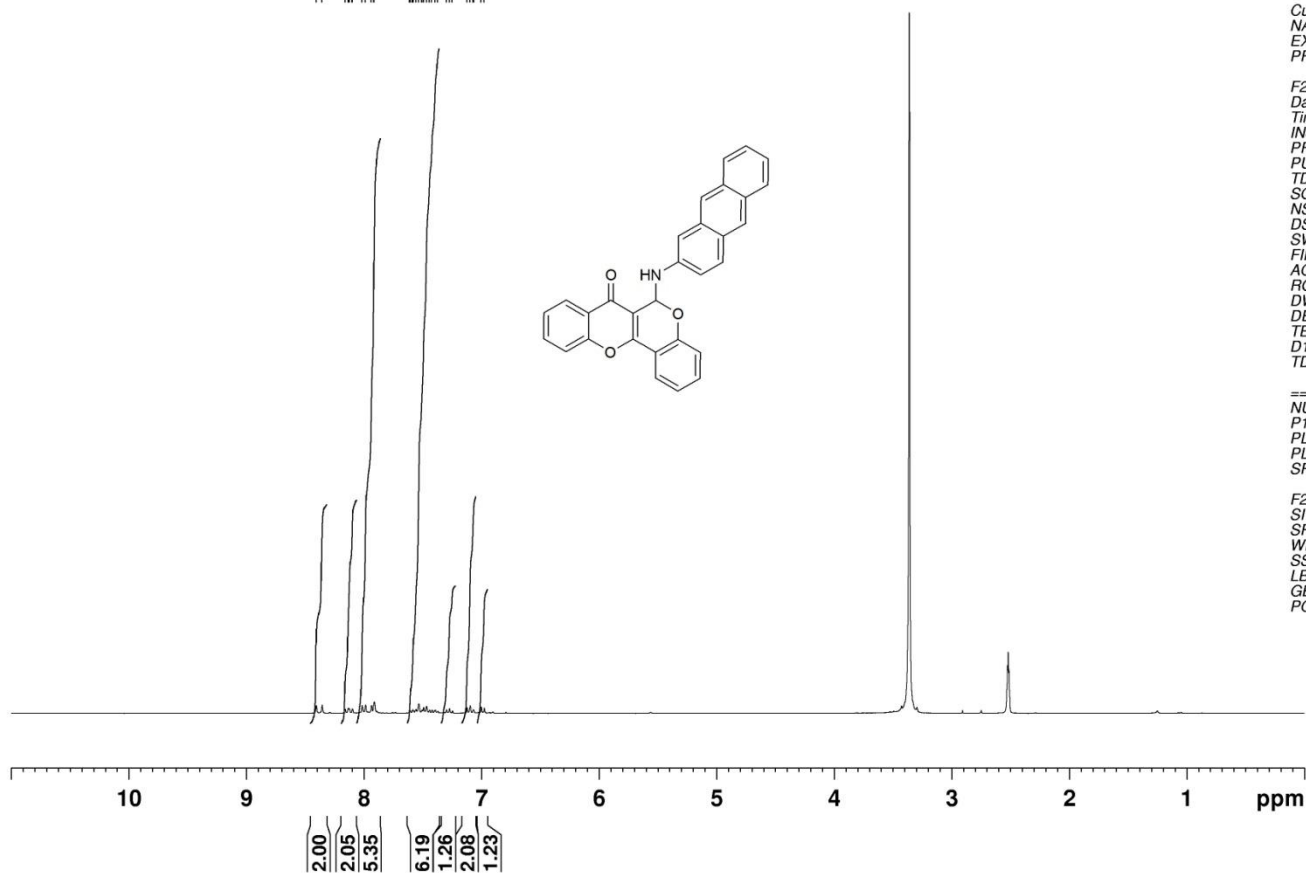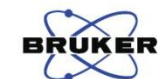

Current Data Parameters  
 NAME 110404.u31  
 EXPNO 10  
 PROCNO 1

F2 - Acquisition Parameters  
 Date\_ 20110404  
 Time 10.19  
 INSTRUM spec  
 PROBHD 5 mm PAE  
 PULPROG zgpg30  
 TD 65536  
 SOLVENT DMF  
 NS 16  
 DS 2  
 SWH 6188.115  
 FIDRES 0.09442  
 AQ 5.2953587  
 RG 181  
 DW 80.800 u  
 DE 10.00 us  
 TE 298.2 K  
 D1 1.00000000  
 TD0 1

===== CHANNEL  
 NUC1 1H  
 P1 10.00 us  
 PL1 0 dB  
 PL1W 11.253251  
 SFO1 300.13185

F2 - Processing parameters  
 SI 32768  
 SF 300.1300000  
 WDW EM  
 SSB 0  
 LB 0.30 Hz  
 GB 0  
 PC 1.00

# Compound 5j

Mkrtchyan SM456 1H DMSO

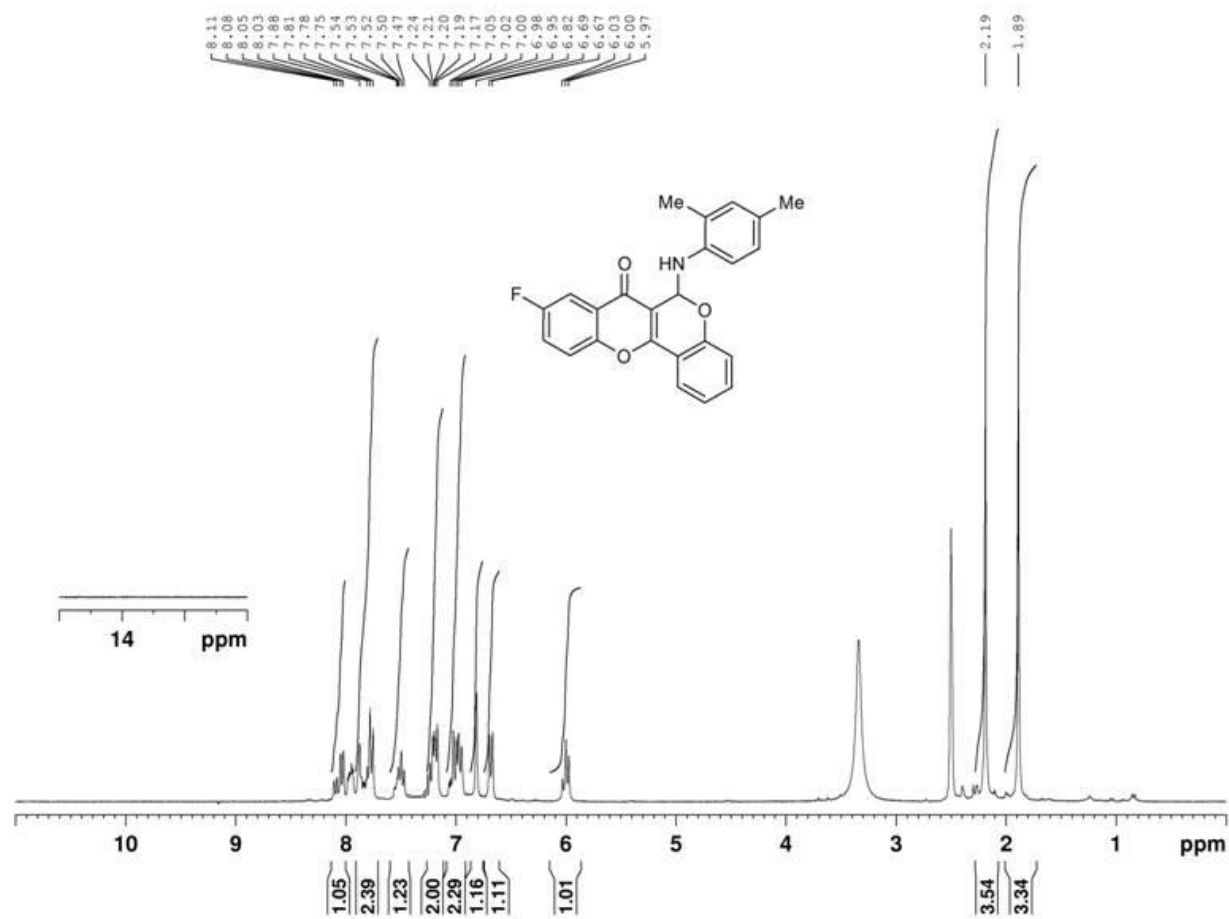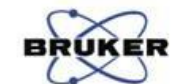

Current Data Parameters  
 NAME 110407.u319 s  
 EXPNO 10  
 PROCNO 1

F2 - Acquisition Parame  
 Date\_ 20110407  
 Time 11:30  
 INSTRUM spect  
 PROBHD 5 mm PABBC  
 PULPROG zg30  
 TD 65536  
 SOLVENT DMSO  
 NS 16  
 DS 2  
 SWH 6188.119 Hz  
 FIDRES 0.094423 Hz  
 AQ 5.2953587 sec  
 RG 181  
 DW 80.800 usec  
 DE 10.00 usec  
 TE 298.2 K  
 D1 1.00000000 sec  
 TD0 1

===== CHANNEL f1  
 NUC1 1H  
 P1 10.00 usec  
 PL1 0 dB  
 PL1W 11.25325108  
 SFO1 300.1318534

F2 - Processing parame  
 SI 32768  
 SF 300.1300072 MHz  
 WDW EM  
 SSB 0  
 LB 0.30 Hz  
 GB 0  
 PC 1.00

# Compound 5k

Mkrtchyan SM833 1H DMSO

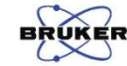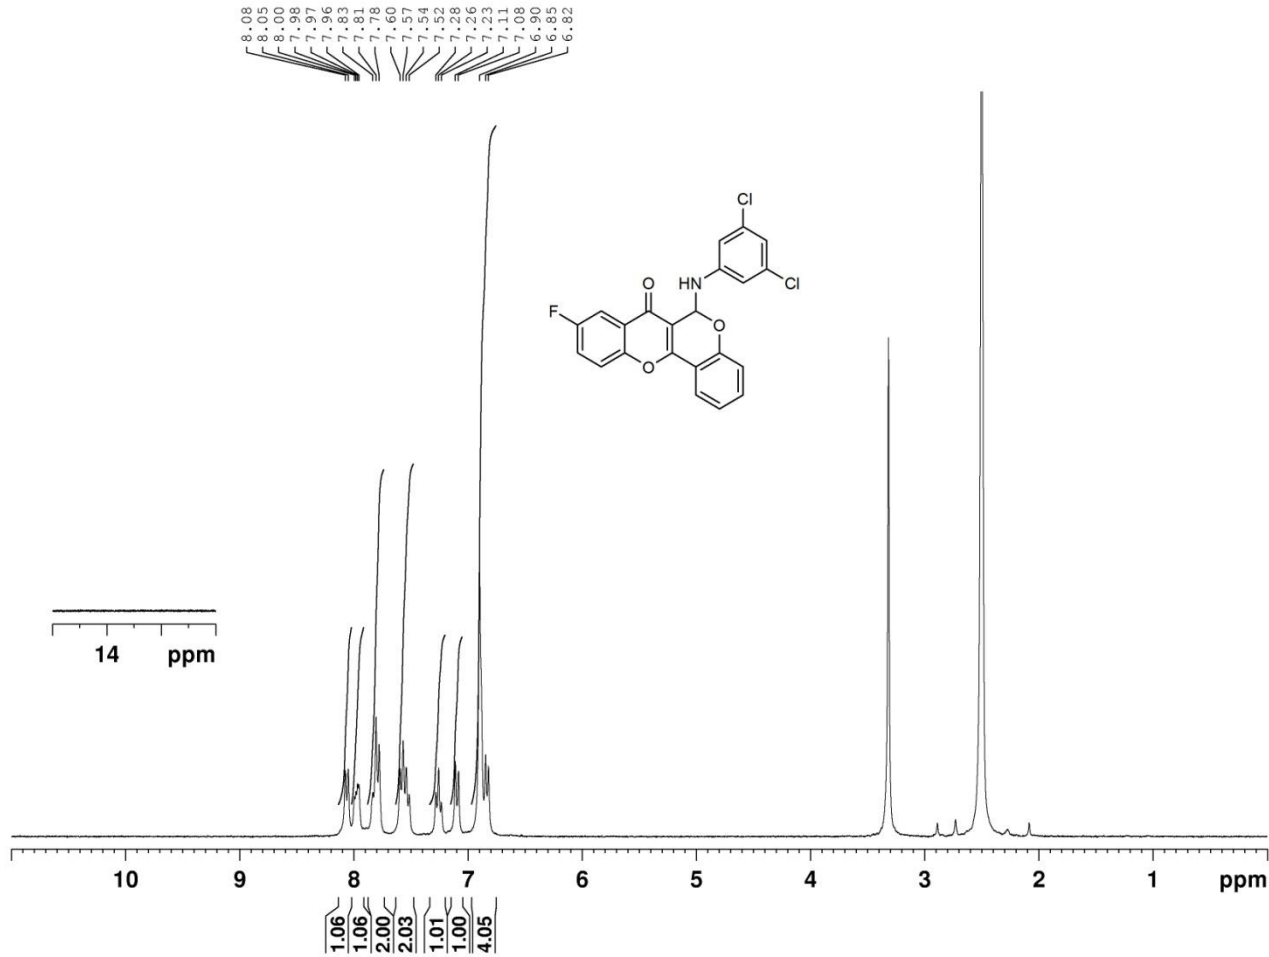

Current Data Parameter  
 NAME 140502.u322  
 EXPNO 10  
 PROCNO 1

F2 - Acquisition Parameter  
 Date\_ 20140502  
 Time 14.18  
 INSTRUM spect  
 PROBHD 5 mm PABD  
 PULPROG zg30  
 TD 65536  
 SOLVENT DMSO  
 NS 16  
 DS 2  
 SWH 6188.119 Hz  
 FIDRES 0.094423  
 AQ 5.2953587 s  
 RG 322  
 DW 80.800 usec  
 DE 10.00 usec  
 TE 298.2 K  
 D1 1.0000000 s  
 TDO 1

===== CHANNEL f  
 NUC1 1H  
 P1 10.00 usec  
 PL1 0 dB  
 PL1W 11.2532510  
 SFO1 300.1318534  
 F2 - Processing parameter  
 SI 32768  
 SF 300.1300272 MHz  
 WDW EM  
 SSB 0  
 LB 0.30 Hz  
 GB 0  
 PC 1.00



# Compound 51

Mkrtchyan SM450 1H DMSO

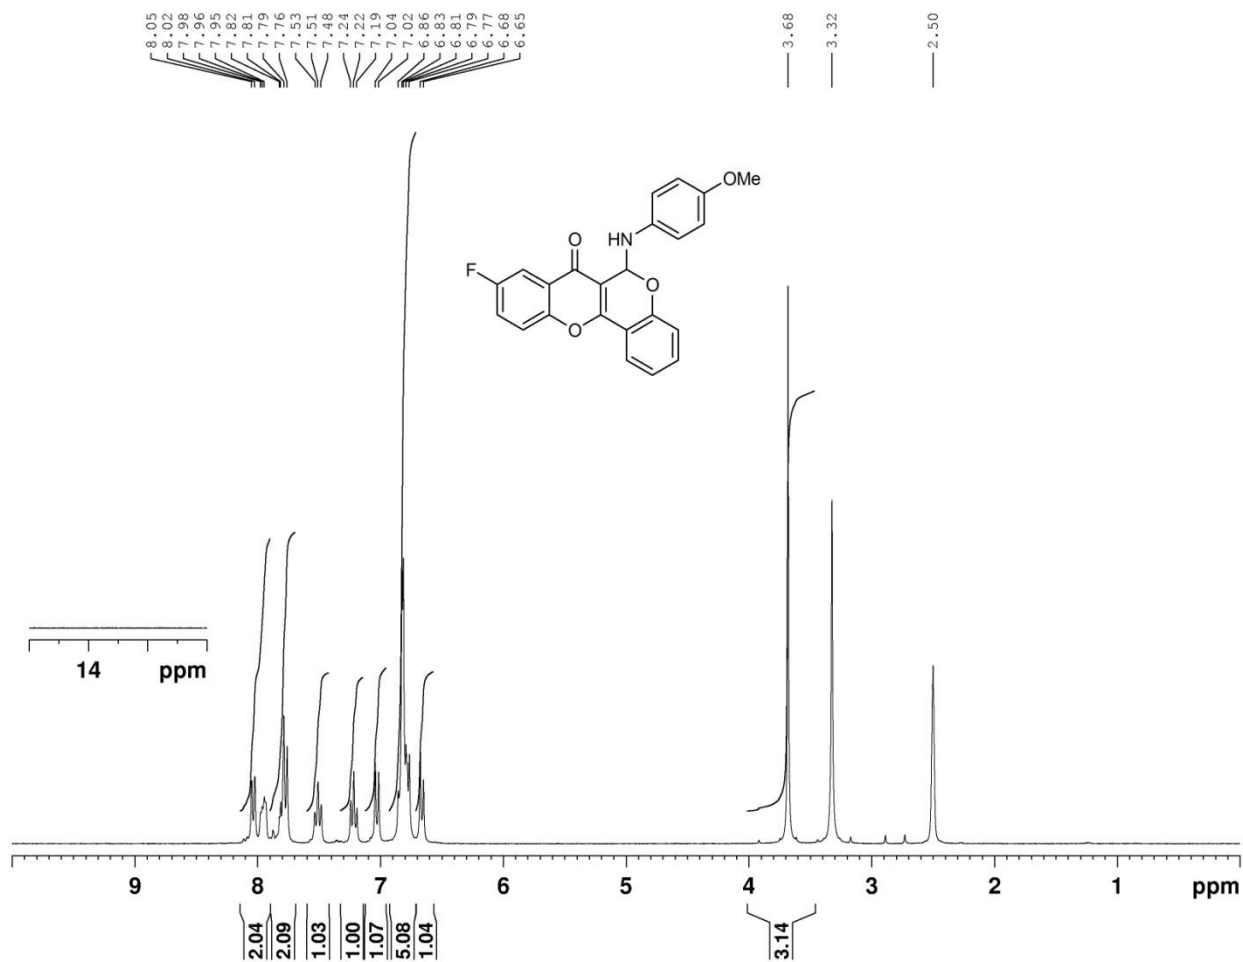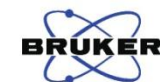

Current Data Parameters  
 NAME 110401.u325.sm  
 EXPNO 10  
 PROCNO 1

F2 - Acquisition Parameter  
 Date\_ 20110401  
 Time 11.07  
 INSTRUM spect  
 PROBHD 5 mm PABBO 1  
 PULPROG zg30  
 TD 65536  
 SOLVENT DMSO  
 NS 16  
 DS 2  
 SWH 6188.119 Hz  
 FIDRES 0.094423 Hz  
 AQ 5.2953587 sec  
 RG 181  
 DW 80.800 usec  
 DE 10.00 usec  
 TE 298.2 K  
 D1 1.00000000 sec  
 TD0 1

==== CHANNEL f1 ==  
 NUC1 1H  
 P1 10.00 usec  
 PL1 0 dB  
 PL1W 11.25325108 W  
 SFO1 300.1318534 M

F2 - Processing parameter  
 SI 32768  
 SF 300.1300072 MHz  
 WDW EM  
 SSB 0  
 LB 0.30 Hz  
 GB 0  
 PC 1.00

# Compound 51

Mkrtchyan SM450 13C DMSO

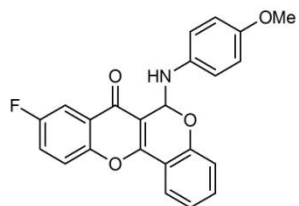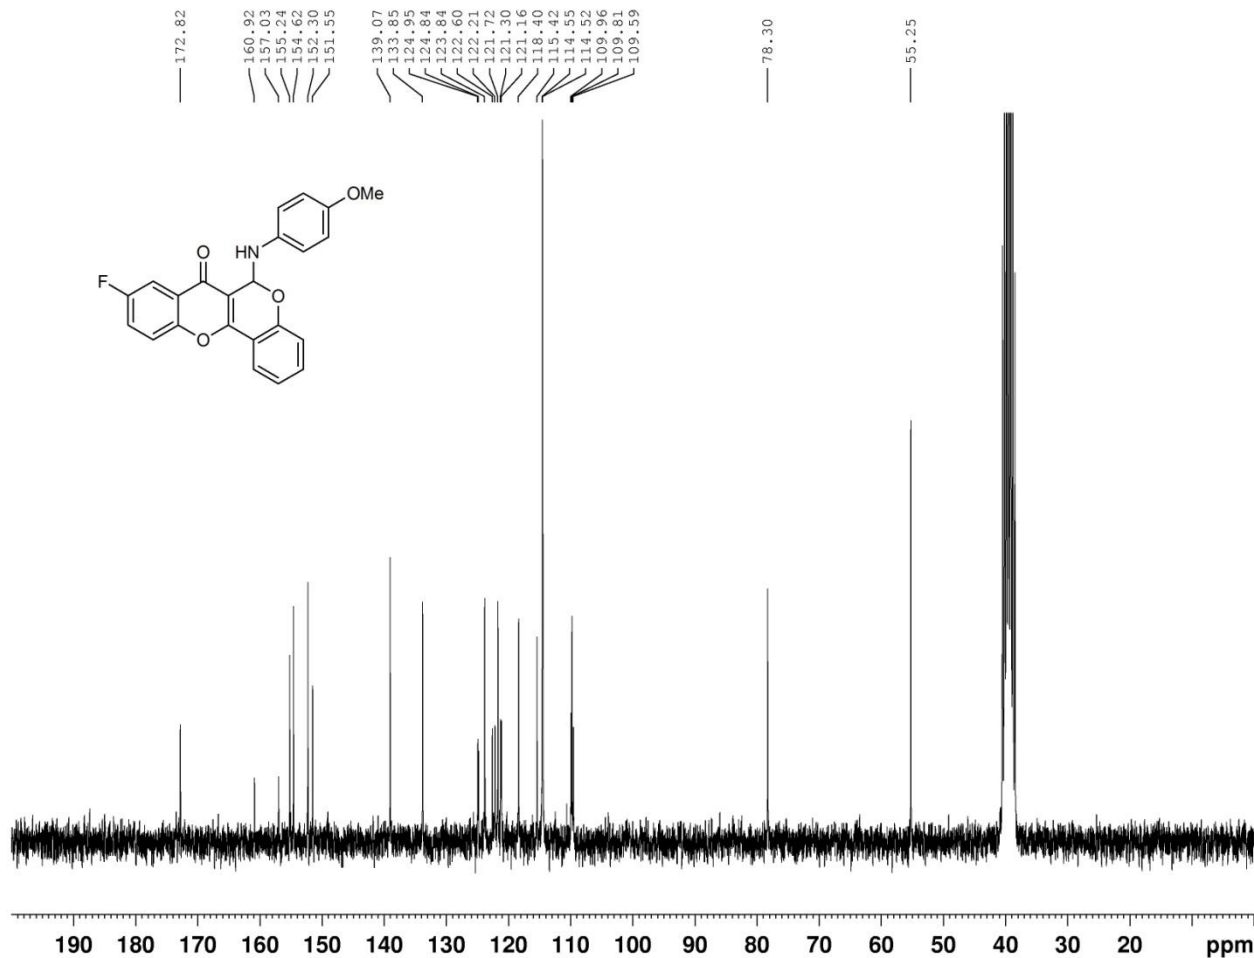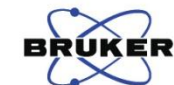

Current Data Paramete  
 NAME 110404.207 s  
 EXPNO 10  
 PROCNO 1

F2 - Acquisition Param  
 Date 20110405  
 Time 0.10  
 INSTRUM spect  
 PROBHD 5 mm PABE  
 PULPROG zgpg3  
 TD 65536  
 SOLVENT DMS  
 NS 1600  
 DS 4  
 SWH 15000.000  
 FIDRES 0.228882  
 AQ 2.1845834 s  
 RG 2050  
 DW 33.333 us  
 DE 10.00 use  
 TE 298.2 K  
 D1 2.00000000 s  
 d11 0.03000000 s  
 DELTA 1.8999999  
 TD0 1

===== CHANNEL 1  
 NUC1 13C  
 P1 10.00 usec  
 PL1 -1.00 dB  
 SFO1 62.901528C

===== CHANNEL 2  
 CPDPRG2 waltz1  
 NUC2 1H  
 PCPD2 70.00 u  
 PL12 15.00 dB  
 PL13 15.00 dB  
 PL2 -2.50 dB  
 SFO2 250.131000C

F2 - Processing param  
 SI 32768  
 SF 62.8952692 M  
 WDW EM  
 SSB 0  
 LB 1.00 Hz  
 GB 0  
 PC 1.40

# Compound 5m

Mkrtchyan SM446 1H DMSO

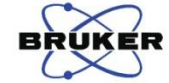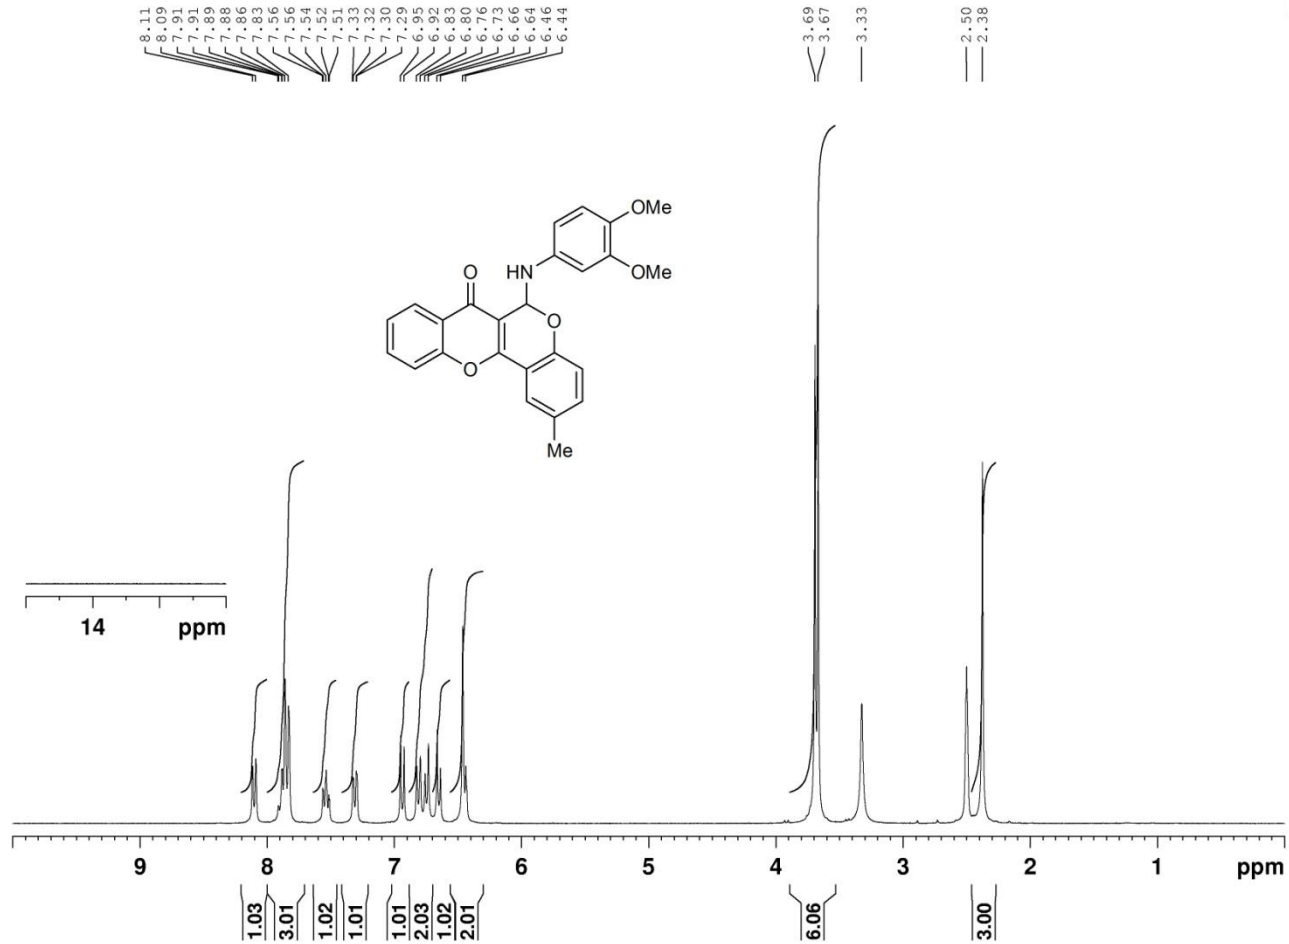

Current Data Parameters  
 NAME 110324.u32  
 EXPNO 10  
 PROCNO 1

F2 - Acquisition Parameters  
 Date\_ 20110324  
 Time 14.21  
 INSTRUM spec  
 PROBHD 5 mm PAE  
 PULPROG zgpg30  
 TD 65536  
 SOLVENT DMF  
 NS 16  
 DS 2  
 SWH 6188.115  
 FIDRES 0.09442  
 AQ 5.2953587  
 RG 144  
 DW 80.800 u  
 DE 10.00 us  
 TE 298.2 K  
 D1 1.00000000  
 TDO 1

===== CHANNEL  
 NUC1 1H  
 P1 10.00 us  
 PL1 0 dB  
 PL1W 11.253251  
 SFO1 300.13185

F2 - Processing parameters  
 SI 32768  
 SF 300.1300061  
 WDW EM  
 SSB 0  
 LB 0.30 Hz  
 GB 0  
 PC 1.00

# Compound 5n

Mkrtchyan SM-447 1H DMSO

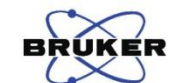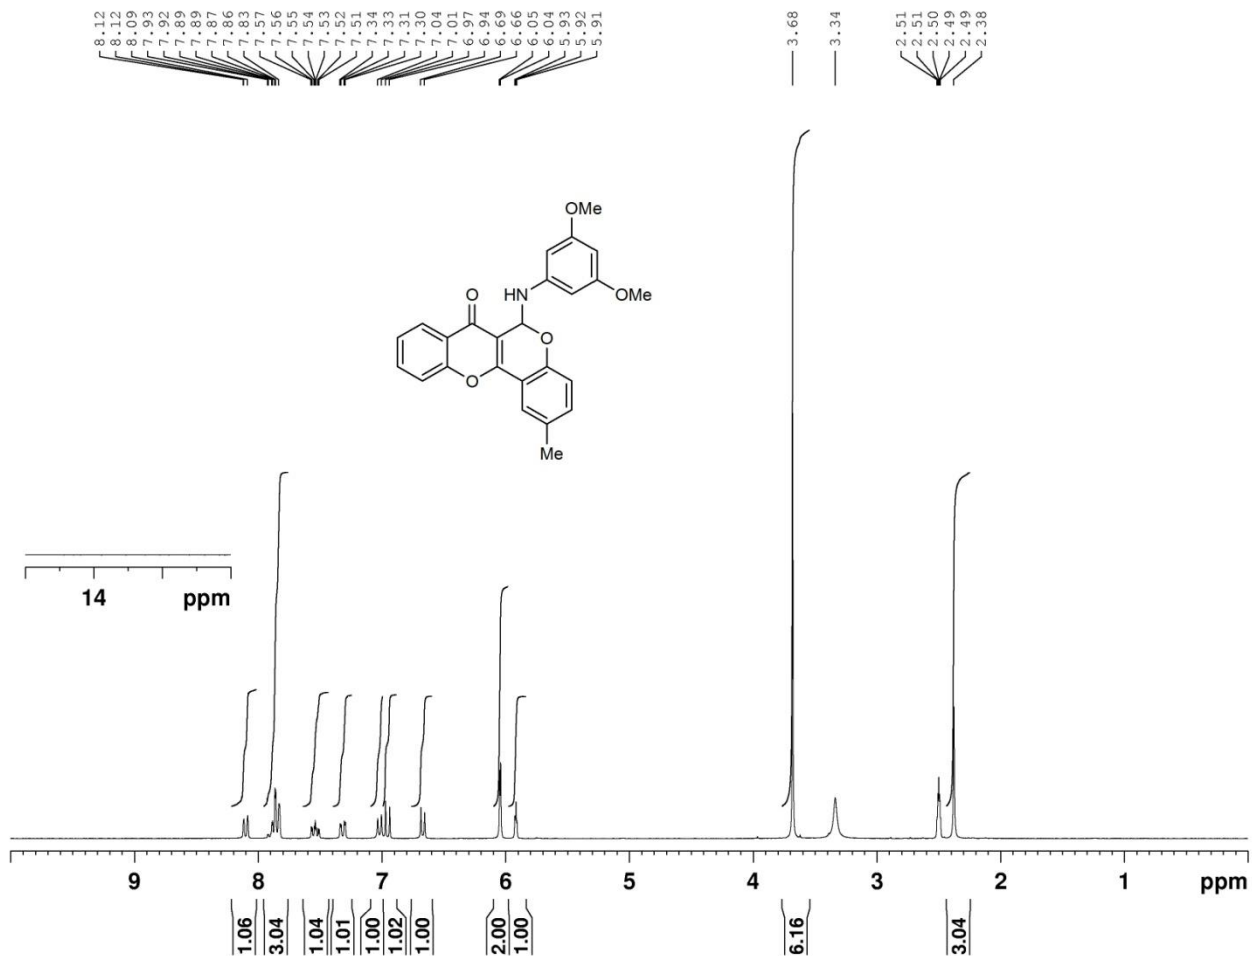

Current Data Param  
 NAME 110324.215  
 EXPNO 10  
 PROCNO 1

F2 - Acquisition Para  
 Date 20110325  
 Time 9.17  
 INSTRUM spec  
 PROBHD 5 mm PAE  
 PULPROG zg3  
 TD 65536  
 SOLVENT DMF  
 NS 16  
 DS 2  
 SWH 5165.285  
 FIDRES 0.07881  
 AQ 6.3439350  
 RG 1440  
 DW 96.800 u  
 DE 10.00 us  
 TE 298.1 K  
 D1 1.0000000  
 TD0 1

==== CHANNEL  
 NUC1 1H  
 P1 10.00 use  
 PL1 -2.50 dE  
 SFO1 250.13154

F2 - Processing para  
 SI 32768  
 SF 250.1299986  
 WDW EM  
 SSB 0  
 LB 0.30 Hz  
 GB 0  
 PC 1.00

# Compound 5n

Mkrtchyan SM447 13C DMSO

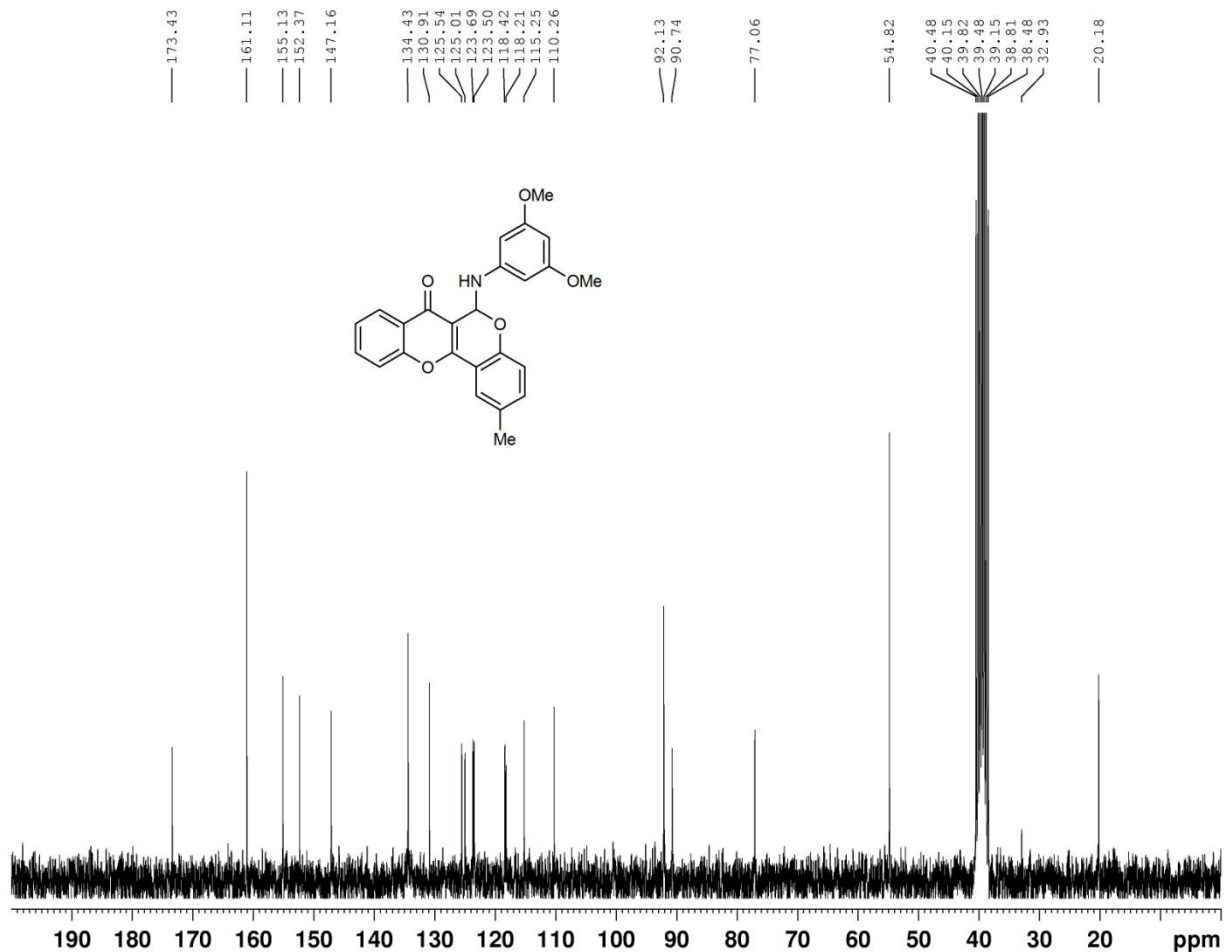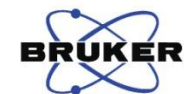

Current Data Parameters  
 NAME 110325.230 sm  
 EXPNO 10  
 PROCNO 1

F2 - Acquisition Parameters  
 Date\_ 20110326  
 Time 14.38  
 INSTRUM spect  
 PROBHD 5 mm PABBO  
 PULPROG zgpg30  
 TD 65536  
 SOLVENT DMSO  
 NS 1024  
 DS 4  
 SWH 15000.000 Hz  
 FIDRES 0.228882 Hz  
 AQ 2.1845834 sec  
 RG 2050  
 DW 33.333 usec  
 DE 10.00 usec  
 TE 298.0 K  
 D1 2.00000000 sec  
 d11 0.03000000 sec  
 DELTA 1.89999998 sec  
 TD0 1

===== CHANNEL f1 =  
 NUC1 13C  
 P1 10.00 usec  
 PL1 -1.00 dB  
 SFO1 62.9015280 M

===== CHANNEL f2 =  
 CPDPRG2 waltz16  
 NUC2 1H  
 PCPD2 70.00 usec  
 PL12 15.00 dB  
 PL13 15.00 dB  
 PL2 -2.50 dB  
 SFO2 250.1310005 M

F2 - Processing parameters  
 SI 32768  
 SF 62.8952692 MHz  
 WDW EM  
 SSB 0  
 LB 1.00 Hz  
 GB 0  
 PC 1.40

# Compound 5n

Mkrtchyan, SM 447, COSY in DMSO

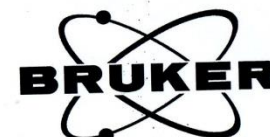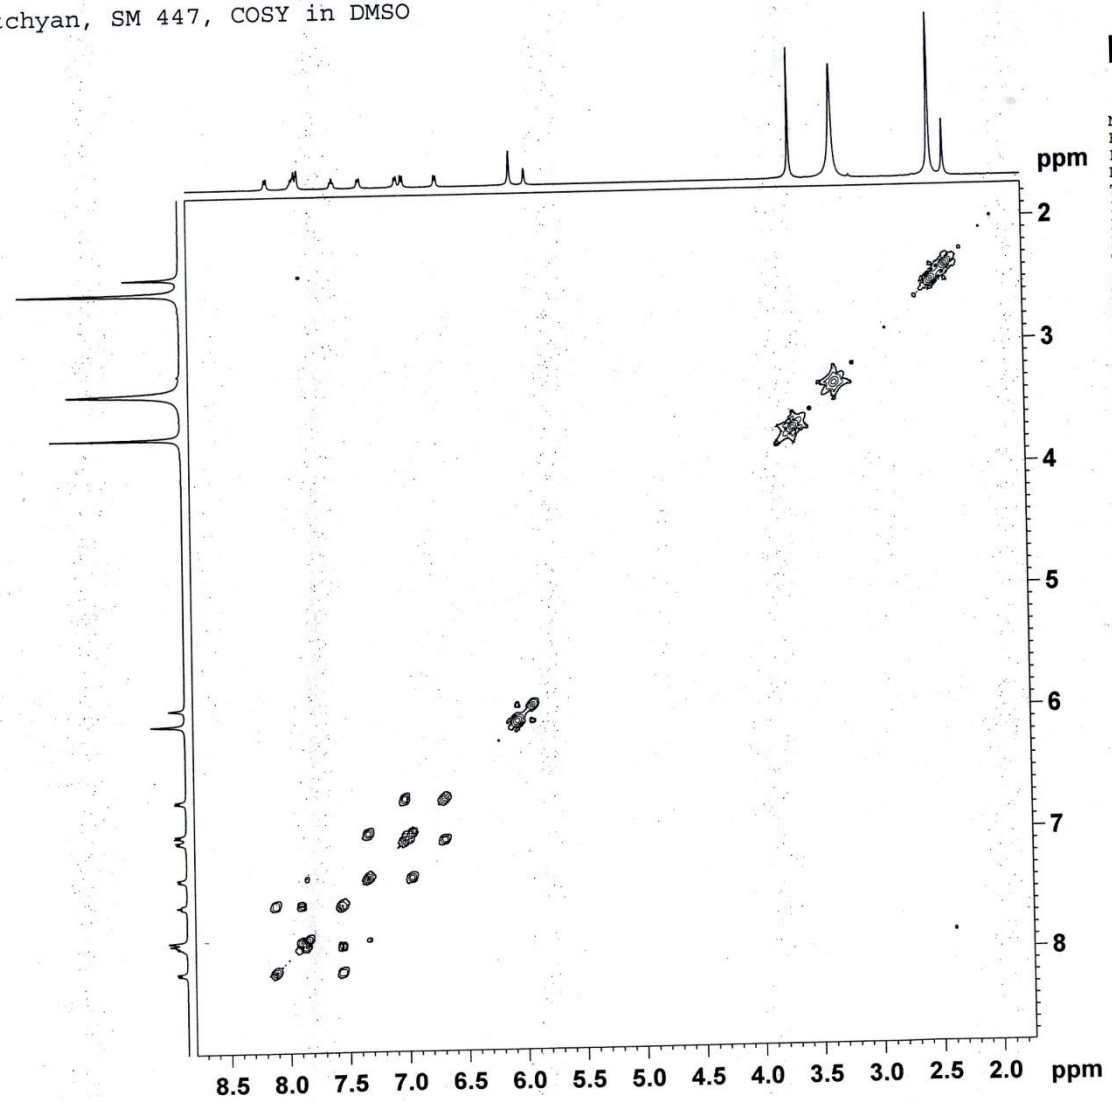

```

NAME      130903.502
EXPNO     11
PROCNO    1
Date_     20130903
Time      16.32
INSTRUM   spect
PROBHD    5 mm PABBO BB-
PULPROG   cosygpgf
TD         2048
SOLVENT   DMSO
NS         2
DS         8
SWH       3531.073 Hz
FIDRES    1.724157 Hz
AQ         0.2901884 sec
RG         161.3
DW         141.600 usec
DE         10.00 usec
TE         300.1 K
D0         0.00000300 sec
D1         1.34967506 sec
D13        0.00000400 sec
D16        0.00020000 sec
INO        0.00028320 sec
    
```

```

===== CHANNEL f1 =====
NUC1      1H
P0         9.80 usec
P1         9.80 usec
PL1        -3.00 dB
SF01      500.1326327 MHz
    
```

```

===== GRADIENT CHANNEL =====
GPNAM1    SINE.100
GPZ1      10.00 %
P16       1000.00 usec
ND0        1
TD         128
SF01      500.1326 MHz
FIDRES    27.586512 Hz
SW         7.060 ppm
FnMODE     QF
SI         1024
SF         500.1300000 MHz
WDW        SINE
SSB         0
LB         0.00 Hz
GB         0
PC         1.40
SI         1024
MC2        QF
SF         500.1300000 MHz
WDW        SINE
SSB         0
LB         0.00 Hz
GB         0
    
```

# Compound 5n

ichyan SM447 NOESY DMSO

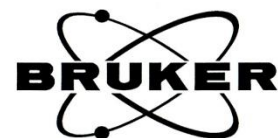

```

NAME      130830.u340
EXPNO     14
PROCNO    1
Date_     20130831
Time_     6.36
INSTRUM   spect
PROBHD    5 mm PABBO BB-
PULPROG   noesyph
TD         2048
SOLVENT   DMSO
NS         16
DS         4
SWH        2127.660 Hz
FIDRES     1.038896 Hz
AQ         0.4813300 sec
RG         64
DW         235.000 usec
DE         10.00 usec
TE         298.2 K
DO         0.0002227 sec
D1         1.85295296 sec
D8         1.50000000 sec
INO        0.00047000 sec
    
```

```

===== CHANNEL f1 =====
NUC1      1H
P1         10.00 usec
PL1        0.00 dB
PL1W      11.25325108 W
SF01      300.1315826 MHz
ND0        1
TD         256
SF01      300.1316 MHz
FIDRES     8.311171 Hz
SW         7.089 ppm
FnMODE    States-TPPI
SI         1024
SF         300.1300000 MHz
WDW        QSINE
SSB        2
LB         0.00 Hz
GB         0
PC         1.00
SI         1024
MC2       States-TPPI
SF         300.1300000 MHz
WDW        QSINE
SSB        2
LB         0.00 Hz
GB         0
    
```

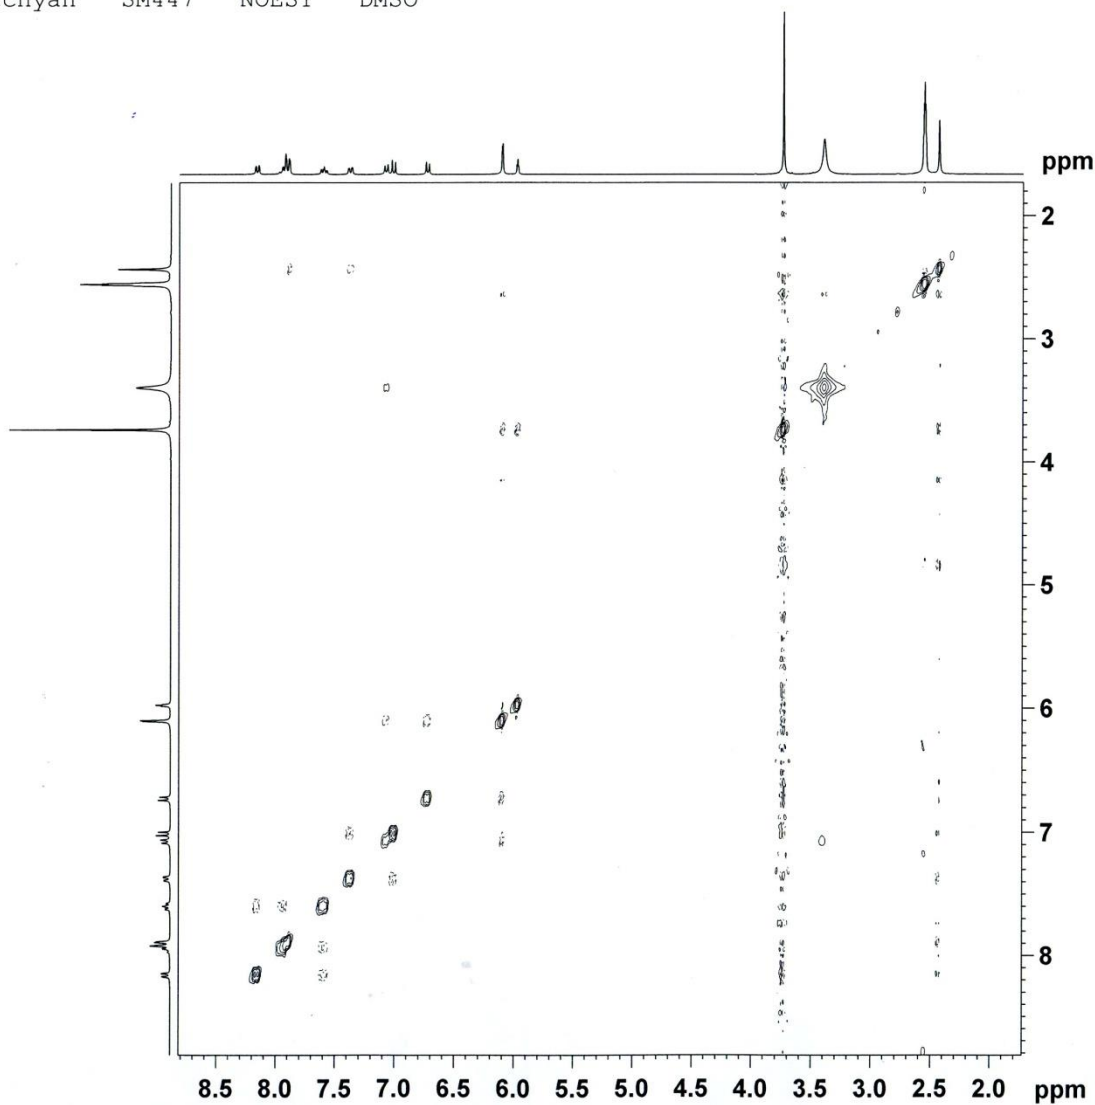



# Compound 5n

Mkrtchyan, SM 447, HSQC in DMSO

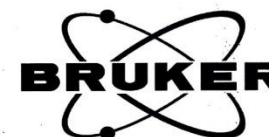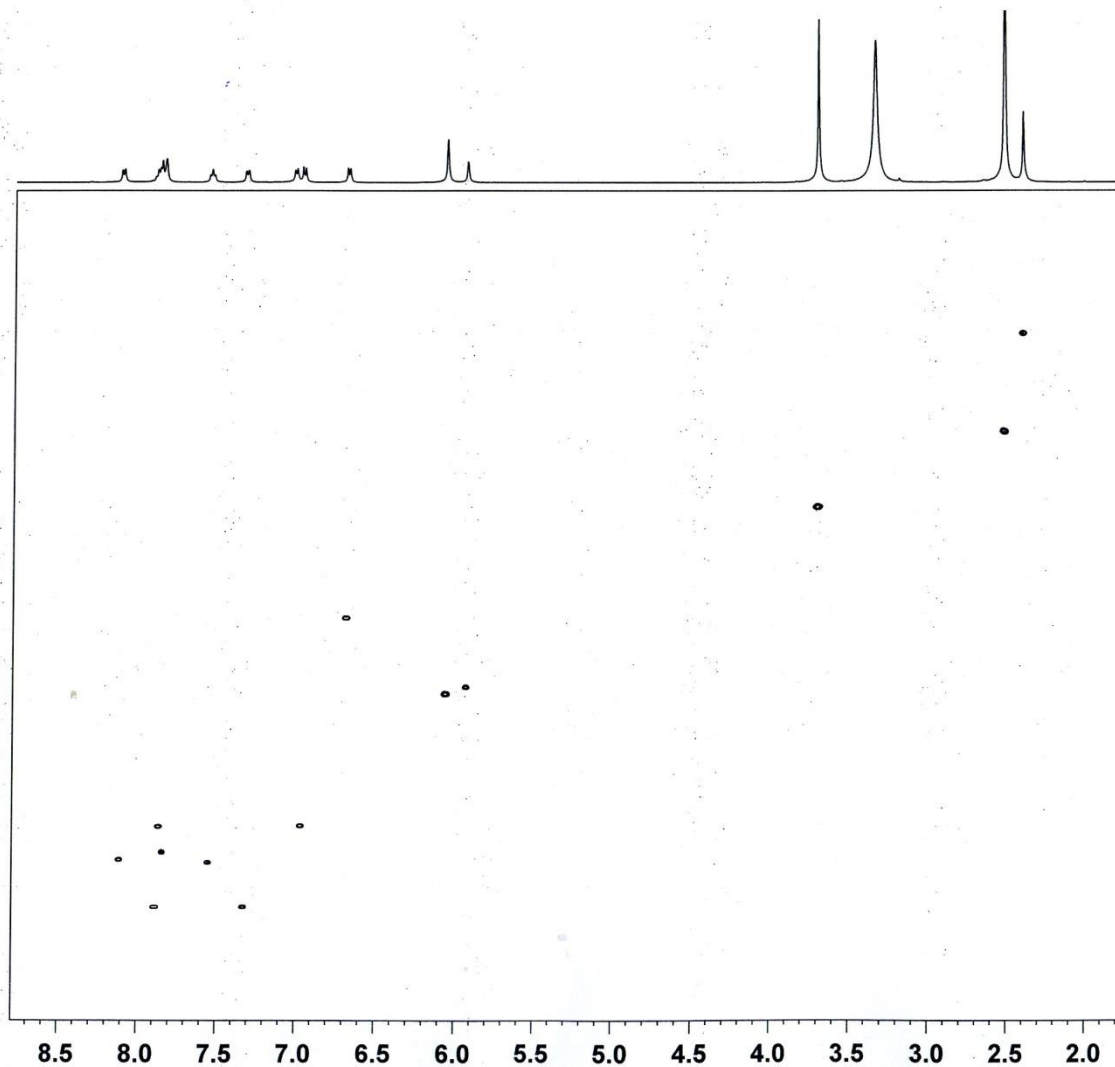

NAME 130903.502  
 EXPNO 12  
 PROCNO 1  
 Date\_ 20130903  
 Time 16.42  
 INSTRUM spect  
 PROBHD 5 mm PABBO BB-  
 PULPROG hsqcetps12  
 TD 1024  
 SOLVENT DMSO  
 NS 4  
 DS 16  
 SWH 3531.073 Hz  
 FIDRES 3.448314 Hz  
 AQ 0.1451900 sec  
 RG 18390.4  
 DW 141.600 usec  
 DE 10.00 usec  
 TE 300.1 K  
 CNST2 145.0000000  
 D0 0.0000300 sec  
 D1 1.43139195 sec  
 D4 0.00172414 sec  
 D11 0.03000000 sec  
 D13 0.00004000 sec  
 D16 0.00020000 sec  
 D24 0.00086207 sec  
 INO 0.0002400 sec  
 ZGOFINS

\*\*\*\*\* CHANNEL f1 \*\*\*\*\*  
 NUC1 1H  
 P1 9.80 usec  
 P2 19.60 usec  
 P28 0.00 usec  
 PL1 -3.00 dB  
 SFO1 500.1326327 MHz

\*\*\*\*\* CHANNEL f2 \*\*\*\*\*  
 CPDPRG2 garp  
 NUC2 13C  
 P3 9.00 usec  
 P4 18.00 usec  
 PCPD2 72.00 usec  
 PL2 4.50 dB  
 PL12 22.00 dB  
 SFO2 125.7672177 MHz

\*\*\*\*\* GRADIENT CHANNEL \*\*\*\*\*  
 GPNAM1 SINE.100  
 GPNAM2 SINE.100  
 GPNAM3 SINE.100  
 GPNAM4 SINE.100  
 GPZ1 80.00 %  
 GPZ2 20.10 %  
 GPZ3 11.00 %  
 GPZ4 -5.00 %  
 P16 1000.00 usec  
 P19 600.00 usec  
 ND0 2  
 TD 256  
 SFO1 125.7672 MHz  
 FIDRES 81.380234 Hz  
 SW 165.650 ppm  
 FMODE Echo-Antiecho  
 SI 1024  
 SF 500.1300000 MHz  
 WDW QSINE  
 SSB 2  
 LB 0.00 Hz  
 GB 0  
 PC 1.40  
 SI 1024  
 MC2 echo-antiecho  
 SF 125.7577890 MHz  
 WDW QSINE  
 SSB 2  
 LB 0.00 Hz  
 GB 0



# Compound 5n

Mkrtchyan SM447 HMBC DMSO

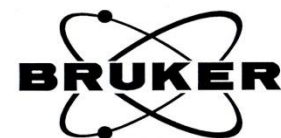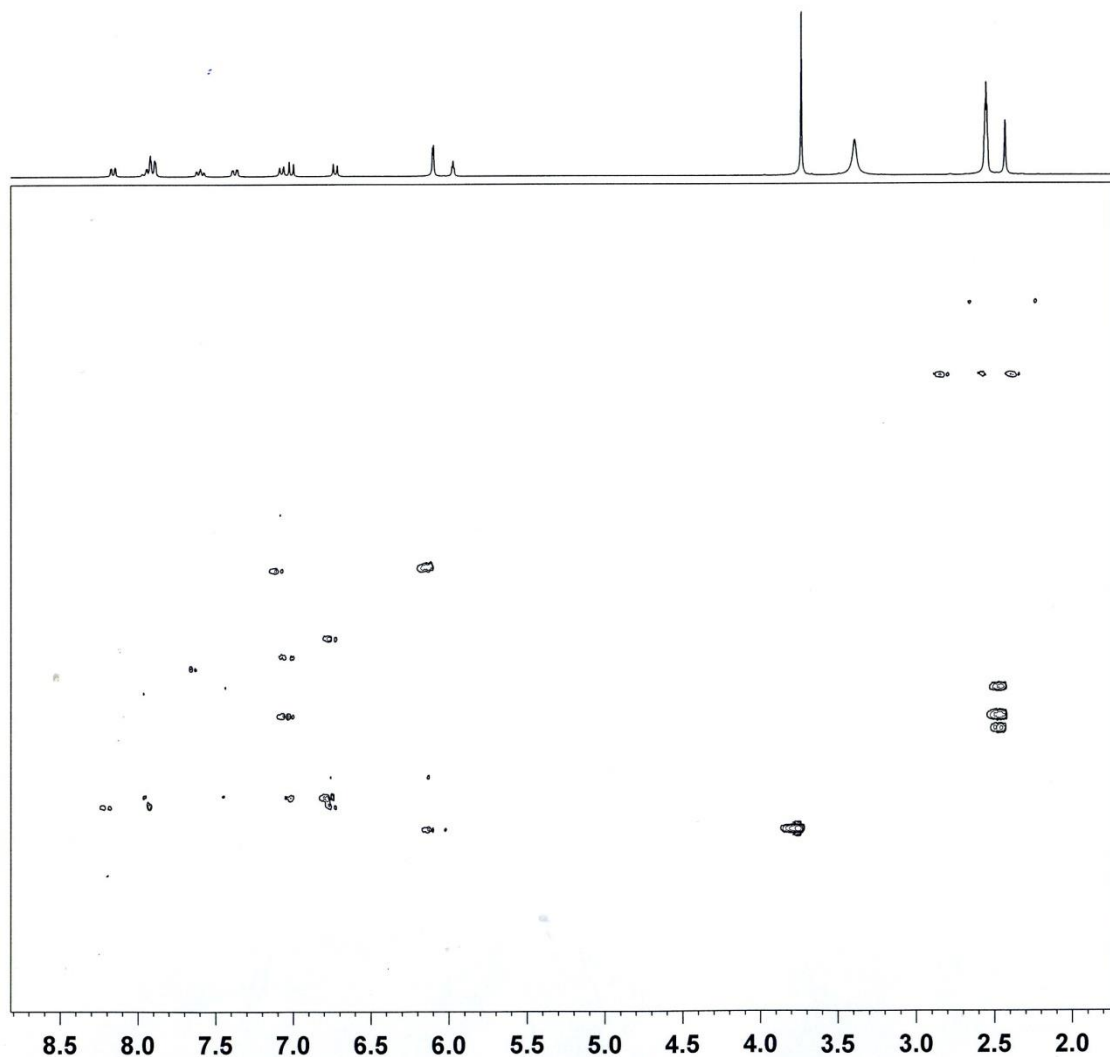

ppm

0

20

40

60

80

100

120

140

160

180

200

ppm

```

NAME          130830.u340
EXPNO         13
PROCNO        1
Date_         20130831
Time          1.52
INSTRUM       spect
PROBHD        5 mm PABBO BB-
PULPROG       hmbcgpndgf
TD            4096
SOLVENT       DMSO
NS            64
DS            16
SWH           2127.660 Hz
FIDRES        0.519448 Hz
AQ            0.9626100 sec
RG            2050
DW            235.000 usec
DE            10.00 usec
TE            298.2 K
CNST13        8.0000000
D0            0.00000300 sec
D1            1.04944003 sec
D6            0.06250000 sec
D16           0.00020000 sec
INO           0.00002985 sec

===== CHANNEL f1 =====
NUC1           1H
P1             10.00 usec
P2             20.00 usec
PL1            0.00 dB
PL1W           11.25325108 W
SFO1           300.1315826 MHz

===== CHANNEL f2 =====
NUC2           13C
P3             10.00 usec
PL2            -0.50 dB
PL2W           33.25691986 W
SFO2           75.4752833 MHz

===== GRADIENT CHANNEL =====
GPNAM1        SINE.100
GPNAM2        SINE.100
GPNAM3        SINE.100
GPZ1           50.00 %
GPZ2           30.00 %
GPZ3           40.10 %
P16            1000.00 usec
ND0            2
TD             128
SFO1           75.47528 MHz
FIDRES        130.958496 Hz
SW             222.095 ppm
FnMODE        QF
SI             1024
SF             300.1300000 MHz
WDW            SINE
SSB            0
LB             0.00 Hz
GB             0
PC             1.40
SI             1024
MC2            QF
SF             75.4677490 MHz
WDW            SINE
SSB            0
LB             0.00 Hz
GB             0
    
```

# Compound 5o

Mkrtchyan SM448 1H DMSO?

8.12  
8.09  
7.98  
7.86  
7.84  
7.82  
7.57  
7.56  
7.54  
7.52  
7.34  
7.33  
7.21  
7.21  
6.99  
6.97  
6.91  
6.88  
6.71  
6.69  
6.17

3.73  
3.57  
3.32  
2.50  
2.38

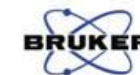

Current Data Parameter:  
NAME 110324\_u322.s  
EXPNO 10  
PROCNO 1

F2 - Acquisition Parameters  
Date\_ 20110324  
Time 14.15  
INSTRUM spect  
PROBHD 5 mm PABBI  
PULPROG zg30  
TD 65536  
SOLVENT DMSO  
NS 16  
DS 2  
SWH 6188.119 Hz  
FIDRES 0.094423 Hz  
AQ 5.2953587 sec  
RG 161  
DW 80.800 usec  
DE 10.00 usec  
TE 298.2 K  
D1 1.00000000 sec  
TD0 1

===== CHANNEL f1  
NUC1 1H  
P1 10.00 usec  
PL1 0 dB  
PL1W 11.25325108  
SFO1 300.1318534

F2 - Processing parameters  
SI 32768  
SF 300.1300072 MHz  
WDW EM  
SSB 0  
LB 0.30 Hz  
GB 0  
PC 1.00

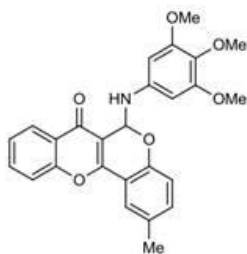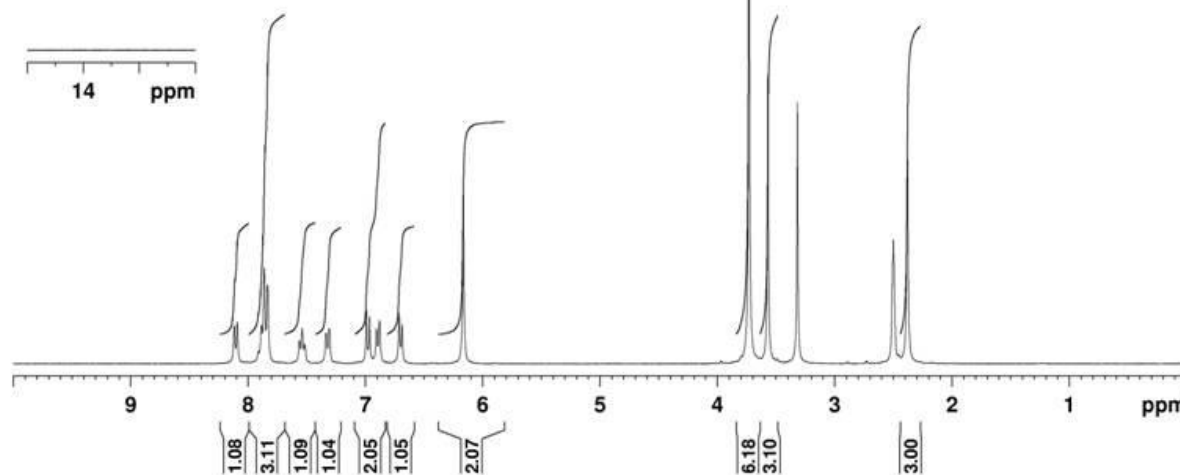

# Compound 5p

Mkrtchyan SM831-3 1H DMSO

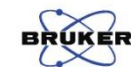

8.12  
8.11  
8.09  
7.94  
7.93  
7.92  
7.91  
7.88  
7.85  
7.64  
7.60  
7.58  
7.57  
7.55  
7.55  
7.53  
7.19  
7.12  
7.08  
7.03  
6.99  
6.91  
6.88

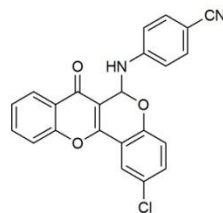

Current Data Param  
NAME 140506.204  
EXPNO 10  
PROCNO 1

F2 - Acquisition Para  
Date\_ 2014050  
Time 9.20  
INSTRUM spect  
PROBHD 5 mm PA  
PULPROG zg  
TD 65536  
SOLVENT DM  
NS 16  
DS 2  
SWH 5165.28  
FIDRES 0.0788  
AQ 6.343935C  
RG 645  
DW 96.800  
DE 10.00 us  
TE 298.1 K  
D1 1.000000C  
TD0 1

===== CHANNEL  
NUC1 1H  
P1 10.00 us  
PL1 -2.50 d  
SFO1 250.13154

F2 - Processing para  
SI 32768  
SF 250.129998  
WDW EM  
SSB 0  
LB 0.30 Hz  
GB 0  
PC 1.00

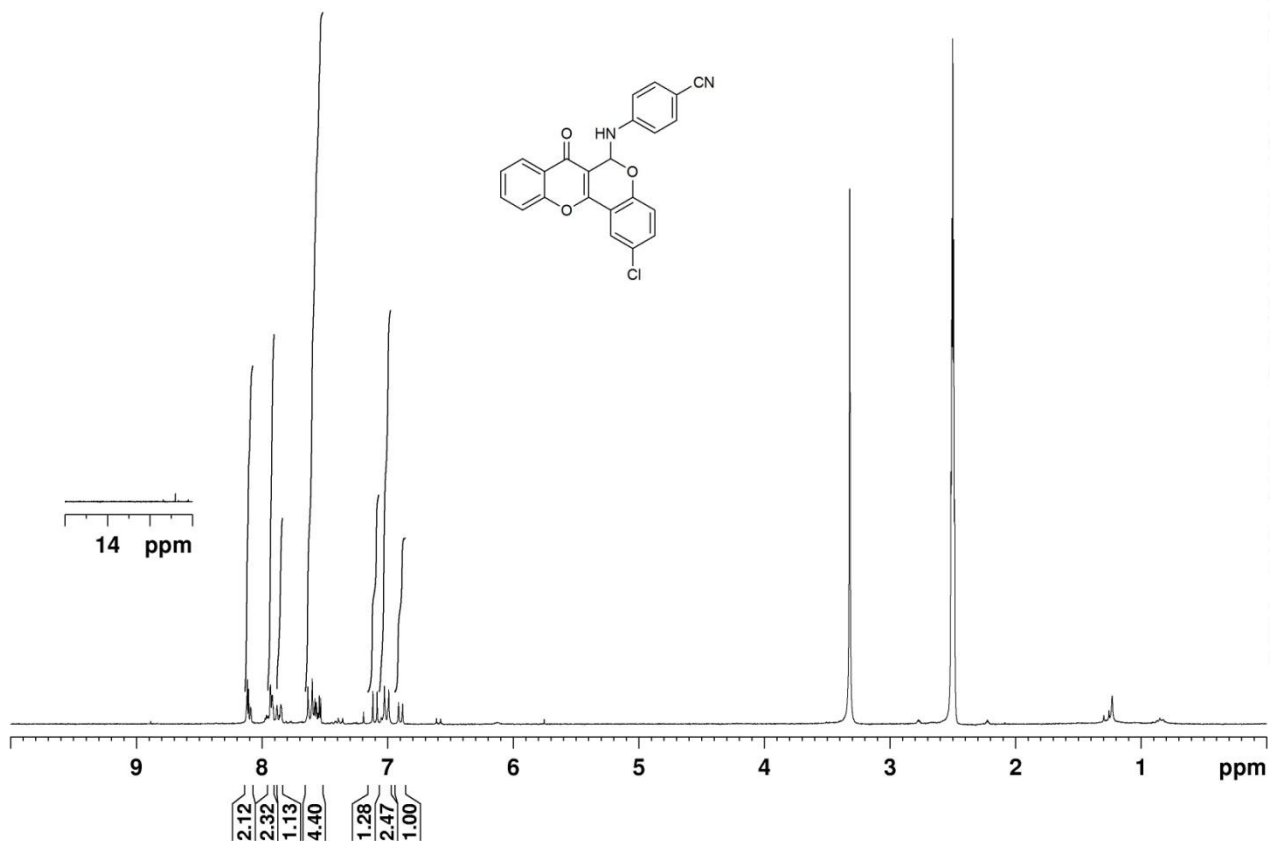

# Compound 5q

Mkrtchyan R807 1H DMSO

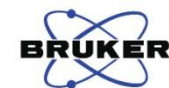

Current Data Parameters  
 NAME 130704.u326  
 EXPNO 10  
 PROCNO 1

F2 - Acquisition Parameters  
 Date\_ 20130704  
 Time 13.34  
 INSTRUM spect  
 PROBHD 5 mm PABB  
 PULPROG zg30  
 TD 65536  
 SOLVENT DMSO  
 NS 16  
 DS 2  
 SWH 6188.119 Hz  
 FIDRES 0.094423  
 AQ 5.2953587 sec  
 RG 287  
 DW 80.800 usec  
 DE 10.00 usec  
 TE 298.2 K  
 D1 1.00000000 sec  
 TD0 1

===== CHANNEL f  
 NUC1 1H  
 P1 10.00 usec  
 PL1 0 dB  
 PL1W 11.2532510 sec  
 SFO1 300.1318534 MHz

F2 - Processing parameters  
 SI 32768  
 SF 300.1300717 MHz  
 WDW EM  
 SSB 0  
 LB 0.30 Hz  
 GB 0  
 PC 1.00

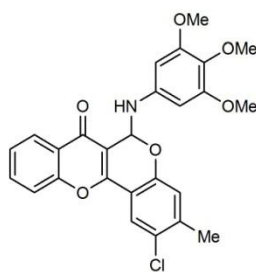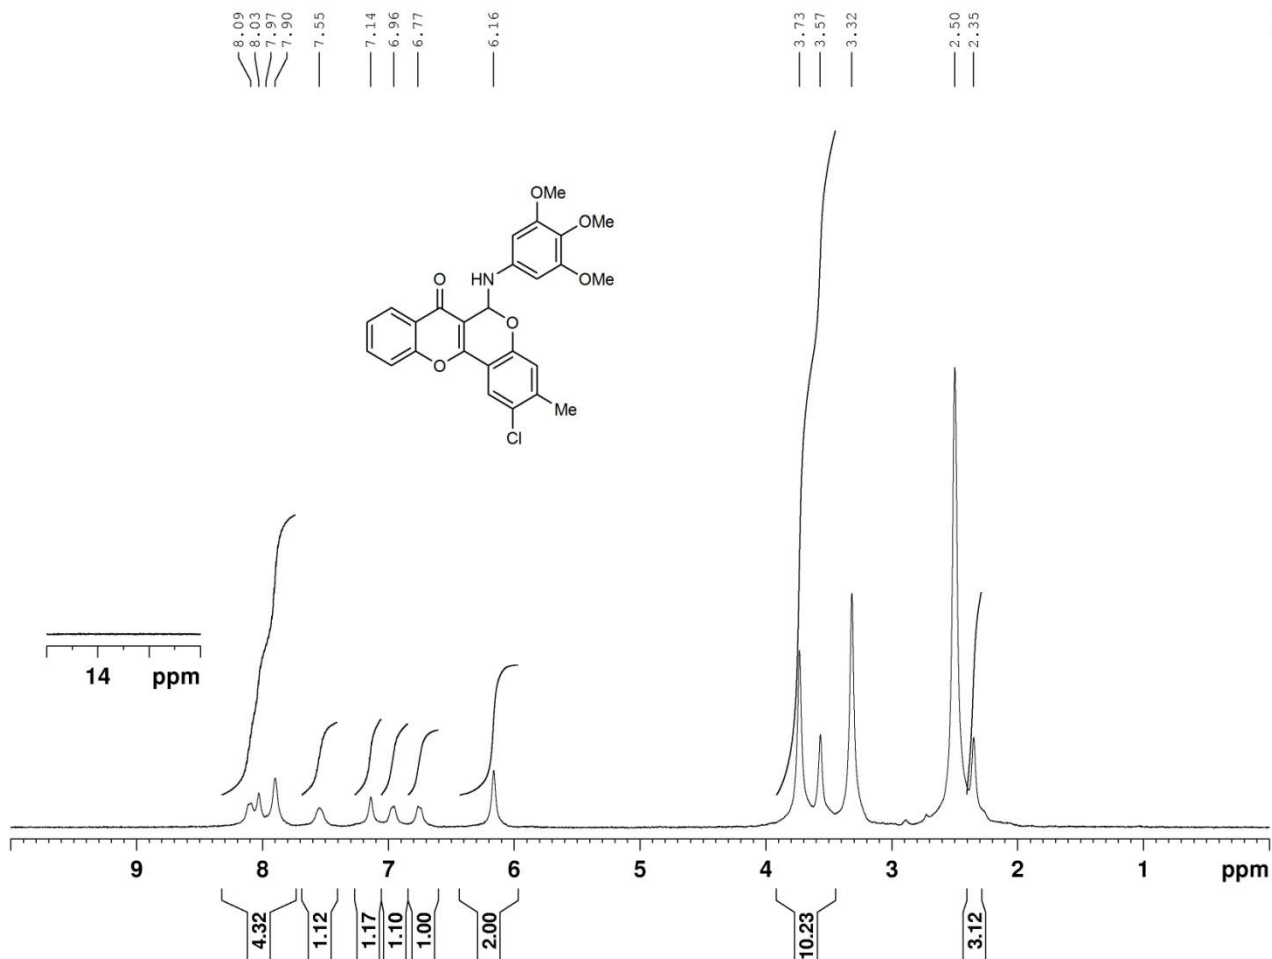

# Compound 5r

Mkrtchyan SM801 1H DMSO

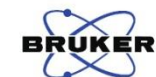

Current Data Parameters  
 NAME 130620.215  
 EXPNO 10  
 PROCNO 1

F2 - Acquisition Parameters  
 Date\_ 20130620  
 Time 12:59  
 INSTRUM spect  
 PROBHD 5 mm PAB  
 PULPROG zg3  
 TD 65536  
 SOLVENT DMS  
 NS 16  
 DS 2  
 SWH 5165.289  
 FIDRES 0.07881  
 AQ 6.3439350  
 RG 645  
 DW 96.800  
 DE 10.00  
 TE 298.3 K  
 D1 1.0000000  
 TD0 1

===== CHANNEL  
 NUC1 1H  
 P1 10.00  
 PL1 -2.50 dB  
 SFO1 250.131544

F2 - Processing parameters  
 SI 32768  
 SF 250.1299982  
 WDW EM  
 SSB 0  
 LB 0.30 Hz  
 GB 0  
 PC 1.00

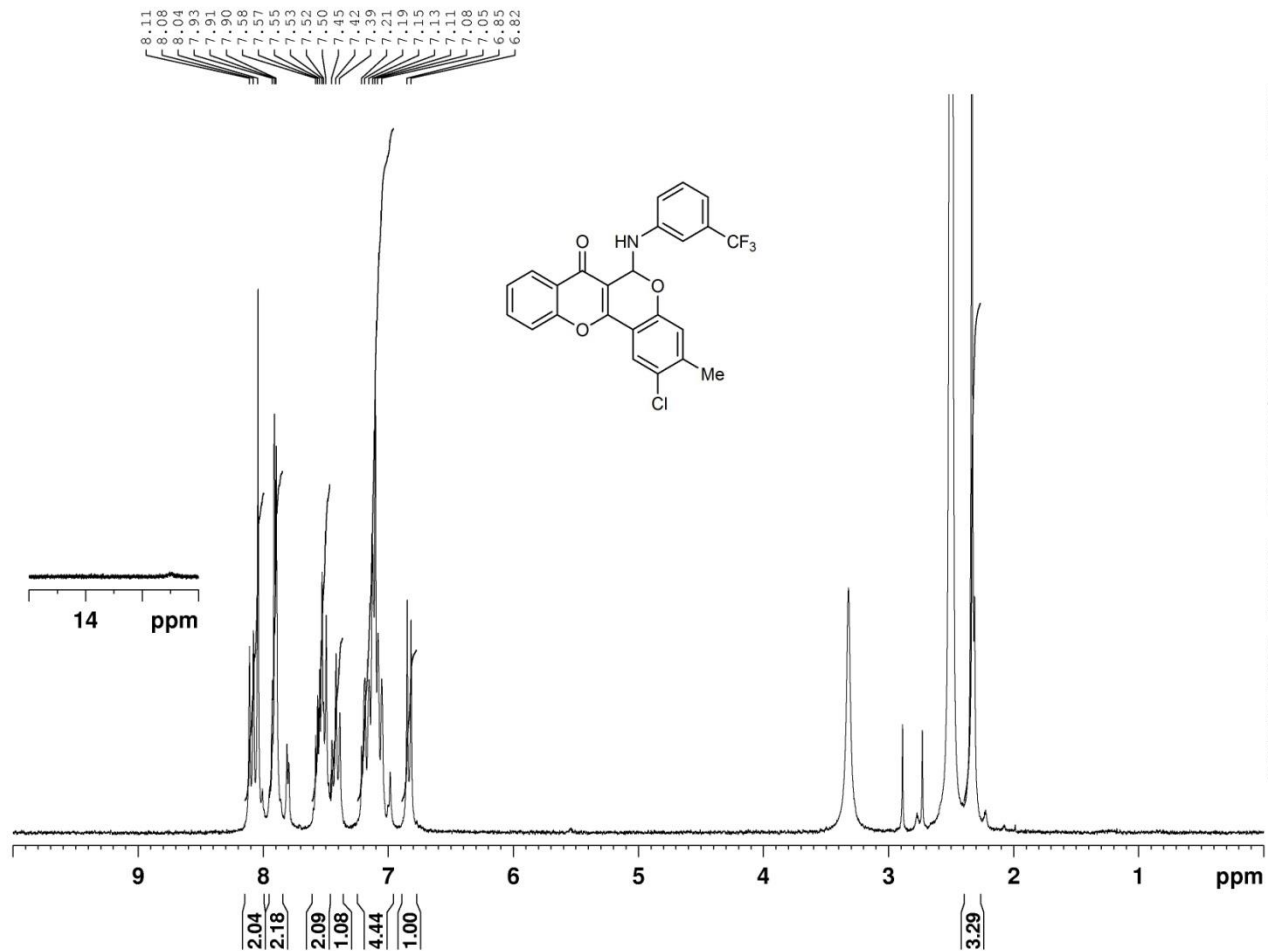

# Compound 5s

Mkrtchyan SM808-1 1H DMSO

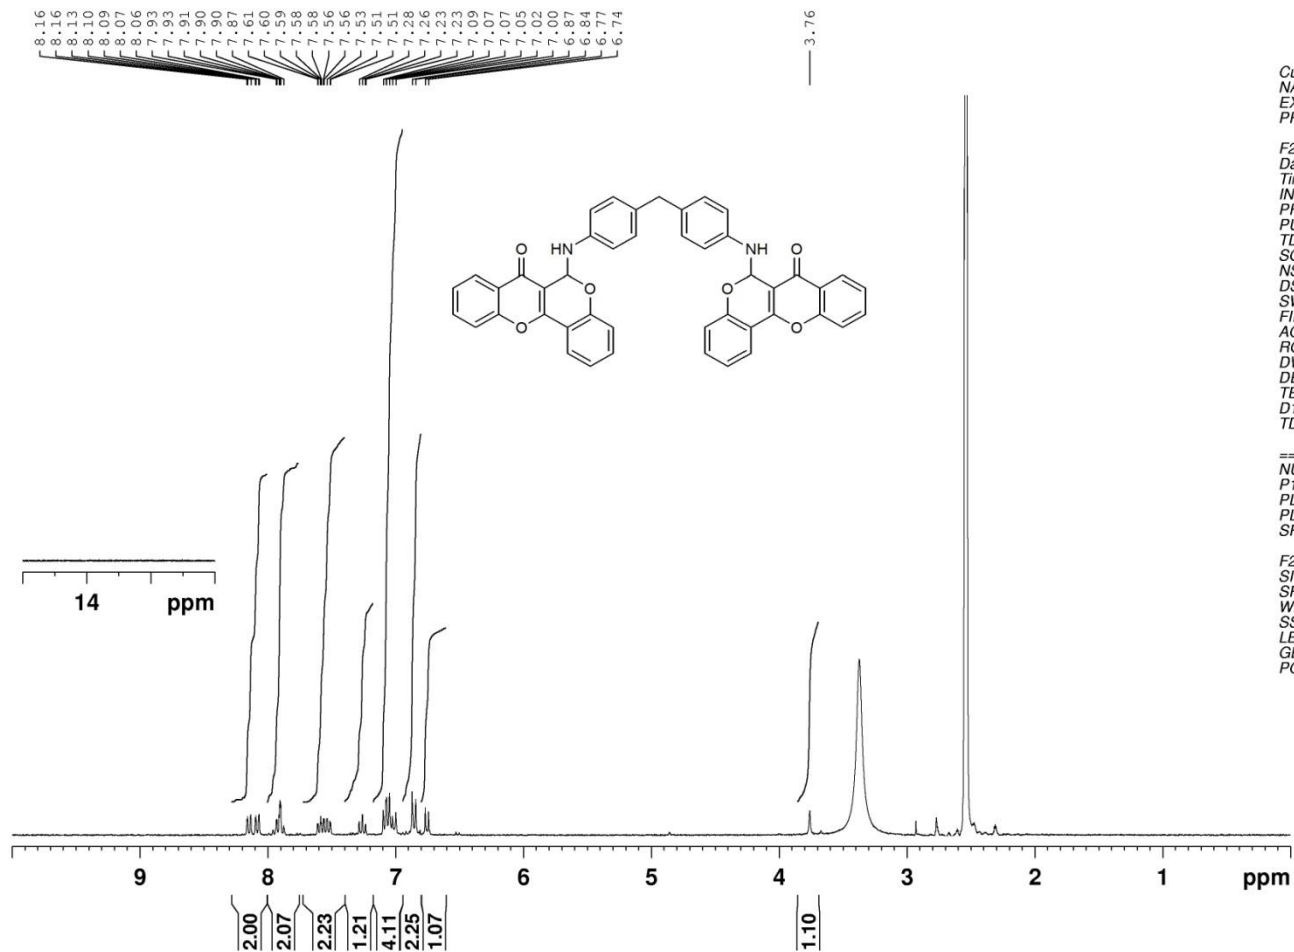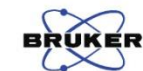

Current Data Parameters  
 NAME 130626.u325  
 EXPNO 10  
 PROCNO 1

F2 - Acquisition Parameters  
 Date\_ 20130626  
 Time 14.11  
 INSTRUM spect  
 PROBHD 5 mm PABBB  
 PULPROG zg30  
 TD 65536  
 SOLVENT DMSO  
 NS 16  
 DS 2  
 SWH 6188.119 Hz  
 FIDRES 0.094423  
 AQ 5.2953587 sec  
 RG 362  
 DW 80.800 usec  
 DE 10.00 usec  
 TE 298.4 K  
 D1 1.00000000 sec  
 TD0 1

===== CHANNEL f  
 NUC1 1H  
 P1 10.00 usec  
 PL1 0 dB  
 PL1W 11.2532510  
 SFO1 300.1318534

F2 - Processing parameters  
 SI 32768  
 SF 300.1300000 MHz  
 WDW EM  
 SSB 0  
 LB 0.30 Hz  
 GB 0  
 PC 1.00

# Compound 6a

Mkrtchyan SM446cr 1H CDC13

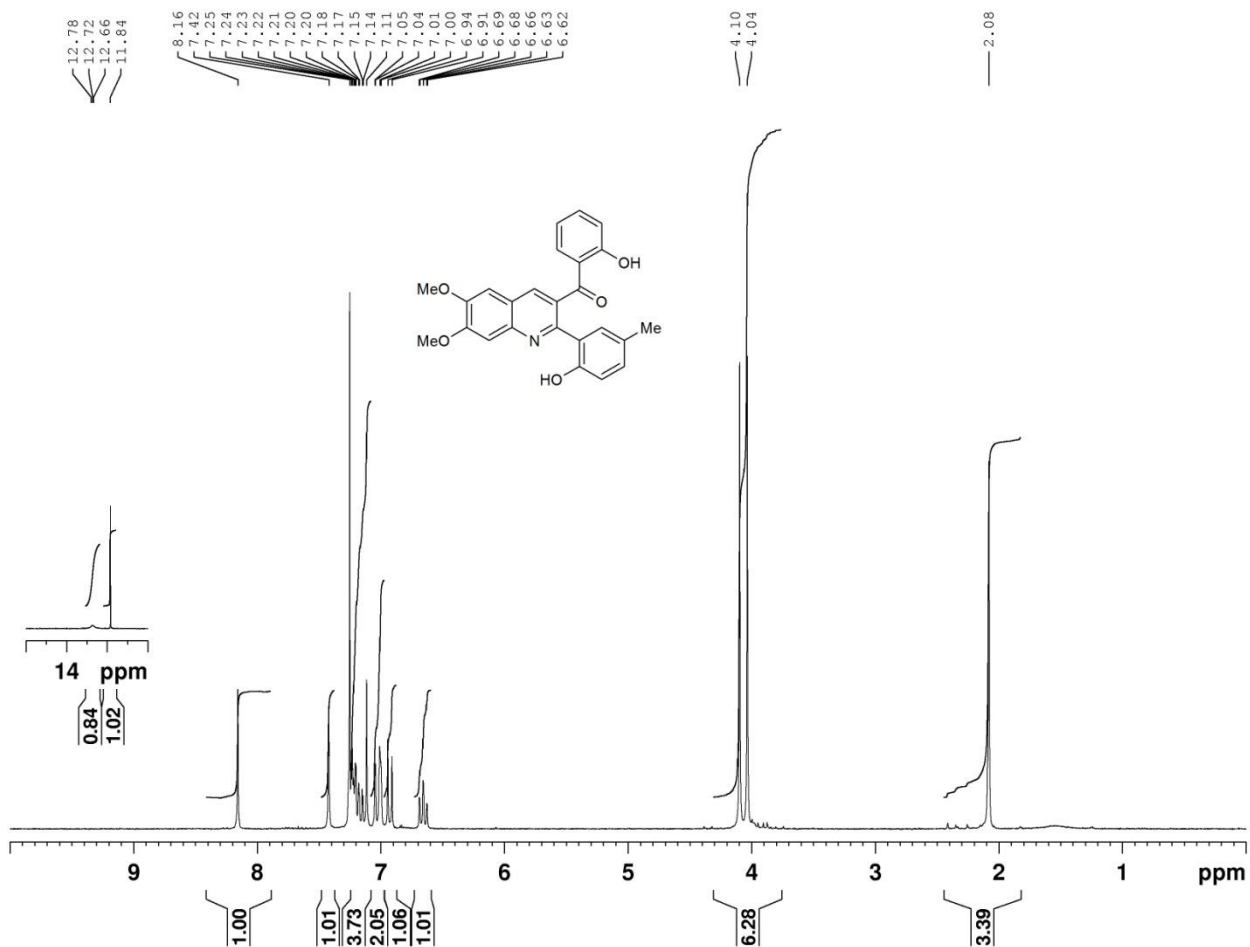

Current Data Parameters  
 NAME 140430.202 sm  
 EXPNO 10  
 PROCNO 1

F2 - Acquisition Parameters  
 Date\_ 20140430  
 Time 11.10  
 INSTRUM spect  
 PROBHD 5 mm PABBO  
 PULPROG zg30  
 TD 65536  
 SOLVENT CDCl3  
 NS 32  
 DS 2  
 SWH 5165.289 Hz  
 FIDRES 0.078816 Hz  
 AQ 6.3439350 sec  
 RG 645  
 DW 96.800 usec  
 DE 10.00 usec  
 TE 298.0 K  
 D1 1.00000000 sec  
 TDO 1

===== CHANNEL f1 =  
 NUC1 1H  
 P1 10.00 usec  
 PL1 -2.50 dB  
 SFO1 250.1315447 M

F2 - Processing parameters  
 SI 32768  
 SF 250.1300030 MHz  
 WDW EM  
 SSB 0  
 LB 0.30 Hz  
 GB 0  
 PC 1.00

# Compound 6a

Mkrtchyan SM446cr 13C CDC13

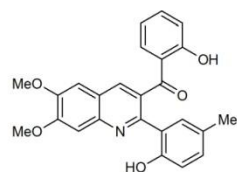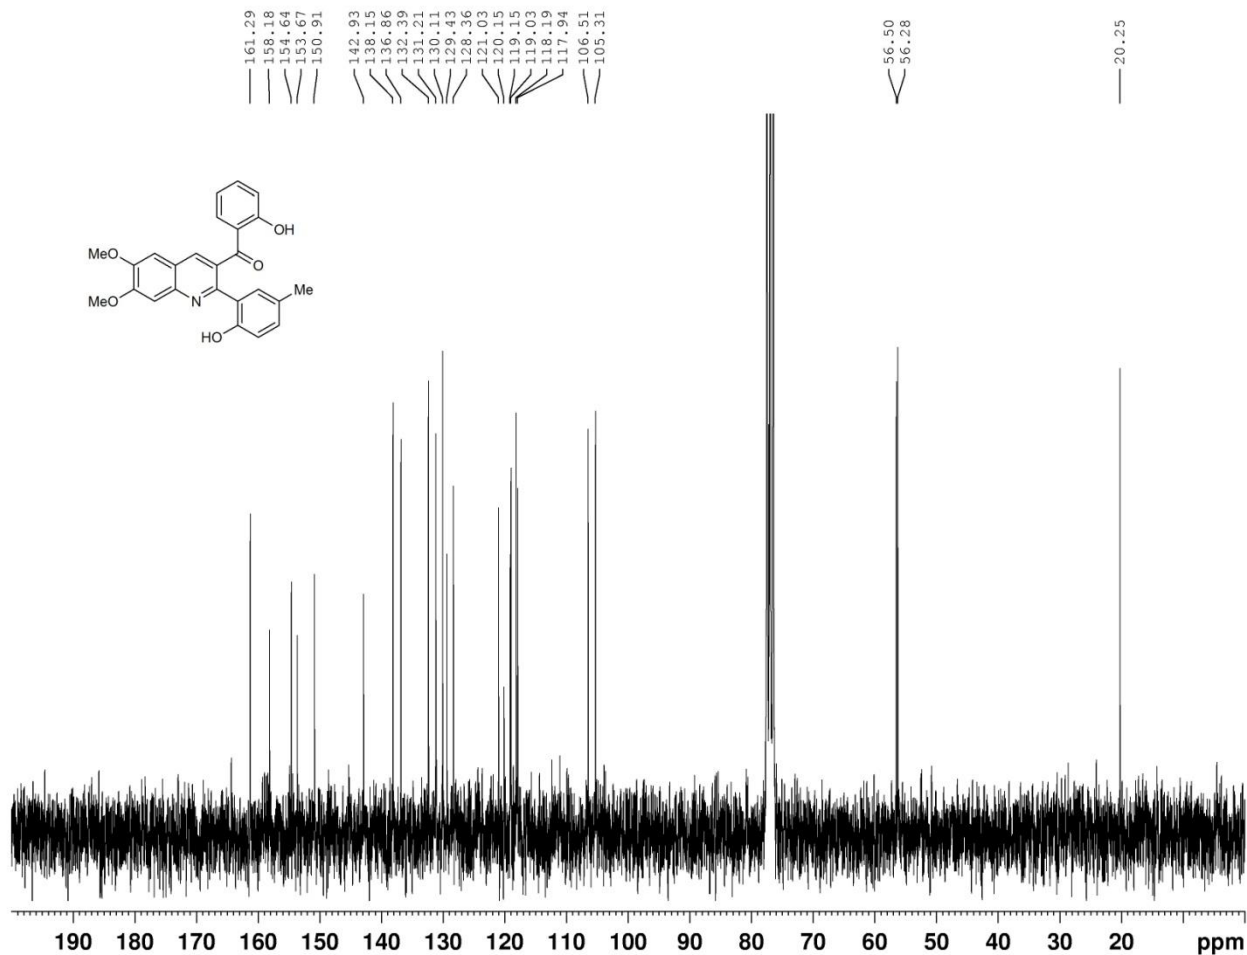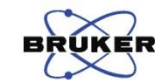

Current Data Parameters  
 NAME 140502.205 sm 4  
 EXPNO 10  
 PROCNO 1

F2 - Acquisition Paramete  
 Date\_ 20140502  
 Time\_ 22.04  
 INSTRUM spect  
 PROBHD 5 mm PABBO 1  
 PULPROG zgpg30  
 TD 65536  
 SOLVENT CDC13  
 NS 3072  
 DS 4  
 SWH 15000.000 Hz  
 FIDRES 0.228882 Hz  
 AQ 2.1845834 sec  
 RG 2050  
 DW 33.333 usec  
 DE 10.00 usec  
 TE 298.2 K  
 D1 2.0000000 sec  
 d11 0.0300000 sec  
 DELTA 1.8999998 se  
 TD0 1

===== CHANNEL f1 =  
 NUC1 13C  
 P1 10.00 usec  
 PL1 -1.00 dB  
 SFO1 62.9015280 M

===== CHANNEL f2 =  
 CPDPRG2 waltz16  
 NUC2 1H  
 PCPD2 70.00 usec  
 PL12 15.00 dB  
 PL13 15.00 dB  
 PL2 -2.50 dB  
 SFO2 250.1310005 M

F2 - Processing paramete  
 SI 32768  
 SF 62.8952384 MHz  
 WDW EM  
 SSB 0  
 LB 1.00 Hz  
 GB 0  
 PC 1.40



# Compound 6a

Mkrtchyan SM446cr Dept CDC13

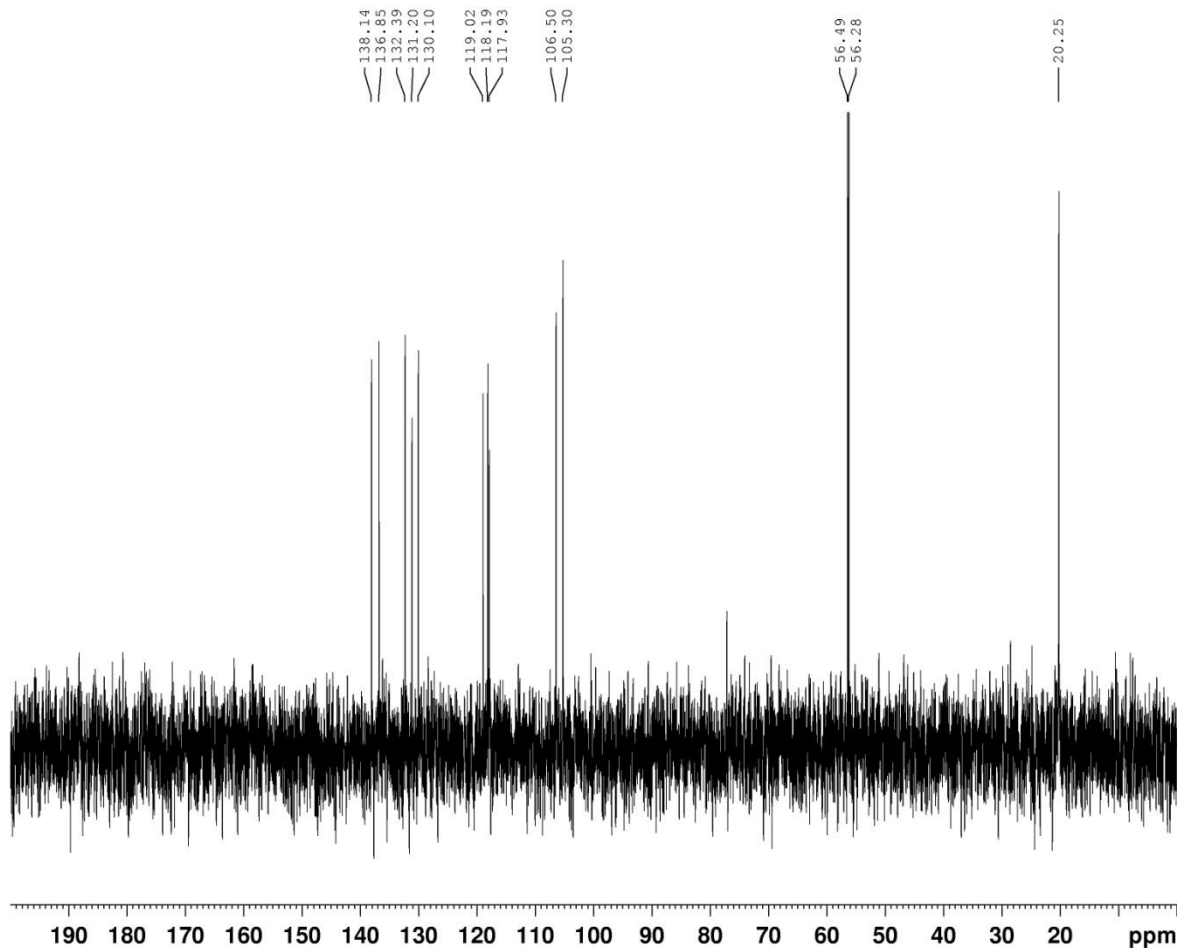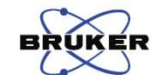

Current Data Parameters  
 NAME 6a 140502.205  
 EXPNO 11  
 PROCNO 1

F2 - Acquisition Parameters  
 Date\_ 20140502  
 Time 22.59  
 INSTRUM spect  
 PROBHD 5 mm PABBO BB-  
 PULPROG dept135  
 TD 65536  
 SOLVENT CDCl3  
 NS 768  
 DS 4  
 SWH 15000.000 Hz  
 FIDRES 0.228882 Hz  
 AQ 2.1845834 sec  
 RG 2050  
 DW 33.333 usec  
 DE 10.00 usec  
 TE 298.1 K  
 CNST2 145.0000000  
 D1 2.0000000 sec  
 d12 0.00002000 sec  
 d2 0.00344828 sec  
 DELTA 0.00001273 sec  
 TD0 1

===== CHANNEL f1 =====  
 NUC1 13C  
 P1 10.00 usec  
 p2 20.00 usec  
 PL1 -1.00 dB  
 SFO1 62.9015280 MHz

===== CHANNEL f2 =====  
 CPDPRG2 waltz16  
 NUC2 1H  
 P3 10.00 usec  
 p4 20.00 usec  
 PCPD2 70.00 usec  
 PL12 15.00 dB  
 PL2 -2.50 dB  
 SFO2 250.1310005 MHz

F2 - Processing parameters  
 SI 32768  
 SF 62.8952390 MHz  
 WDW EM  
 SSB 0  
 LB 1.00 Hz  
 GB 0  
 PC 1.40

# Compound 6b

Mkrtchyan SM809-1-1 1H CDC13

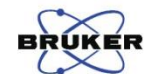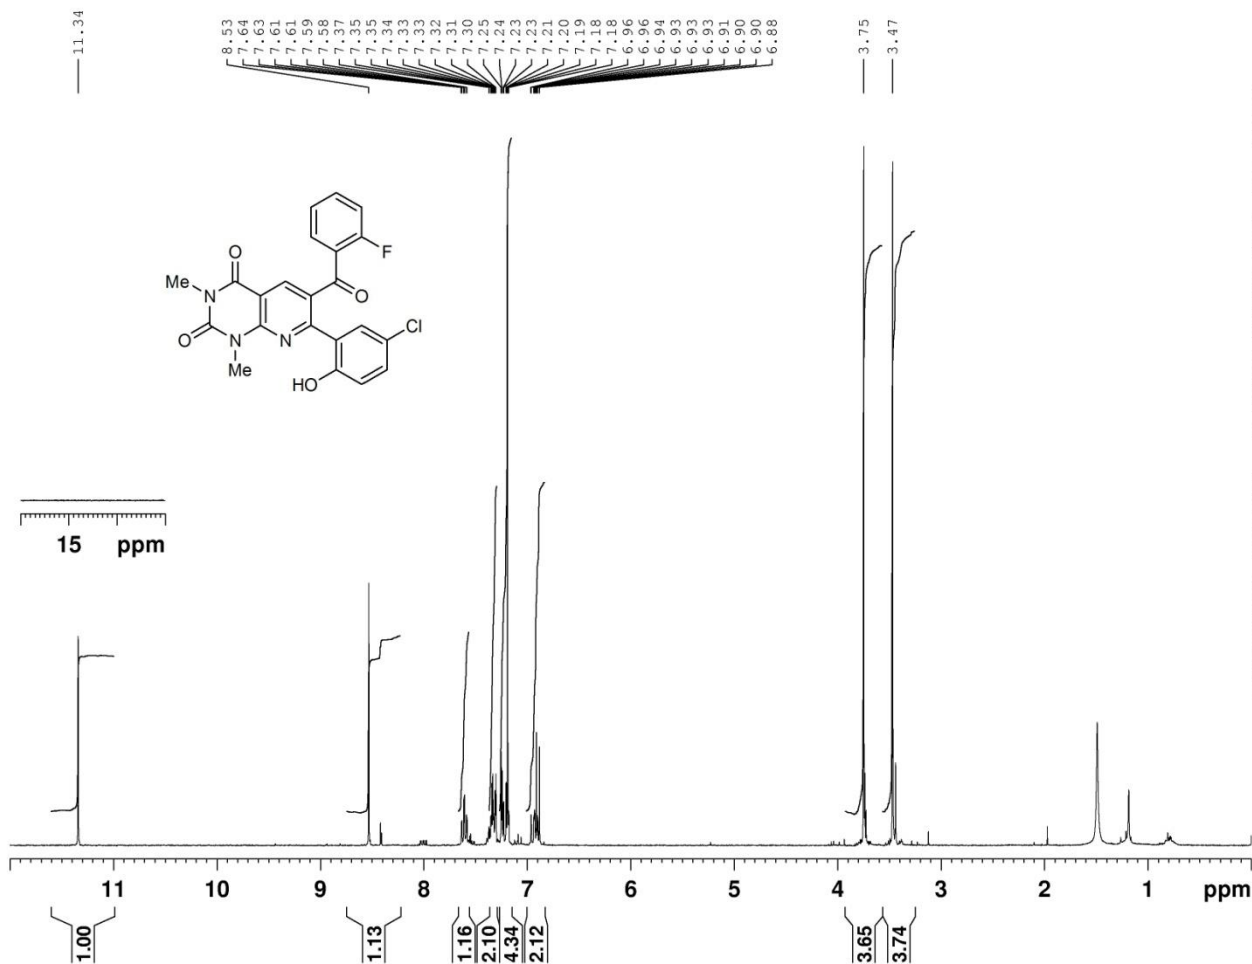

Current Data Parameters  
 NAME 130704.u324.sm  
 EXPNO 10  
 PROCNO 1

F2 - Acquisition Parameters  
 Date\_ 20130704  
 Time 13.23  
 INSTRUM spect  
 PROBHD 5 mm PABBO 1  
 PULPROG zg30  
 TD 65536  
 SOLVENT CDCl3  
 NS 16  
 DS 2  
 SWH 6188.119 Hz  
 FIDRES 0.094423 Hz  
 AQ 5.2953587 sec  
 RG 456  
 DW 80.800 usec  
 DE 10.00 usec  
 TE 298.2 K  
 D1 1.0000000 sec  
 TDO 1

===== CHANNEL f1 =====  
 NUC1 1H  
 P1 10.00 usec  
 PL1 0 dB  
 PL1W 11.25325108 W  
 SFO1 300.1318534 M.

F2 - Processing parameters  
 SI 32768  
 SF 300.1300311 MHz  
 WDW EM  
 SSB 0  
 LB 0.30 Hz  
 GB 0  
 PC 1.00

# Compound 7a

Mkrtchyan SM497-1 1H CDC13

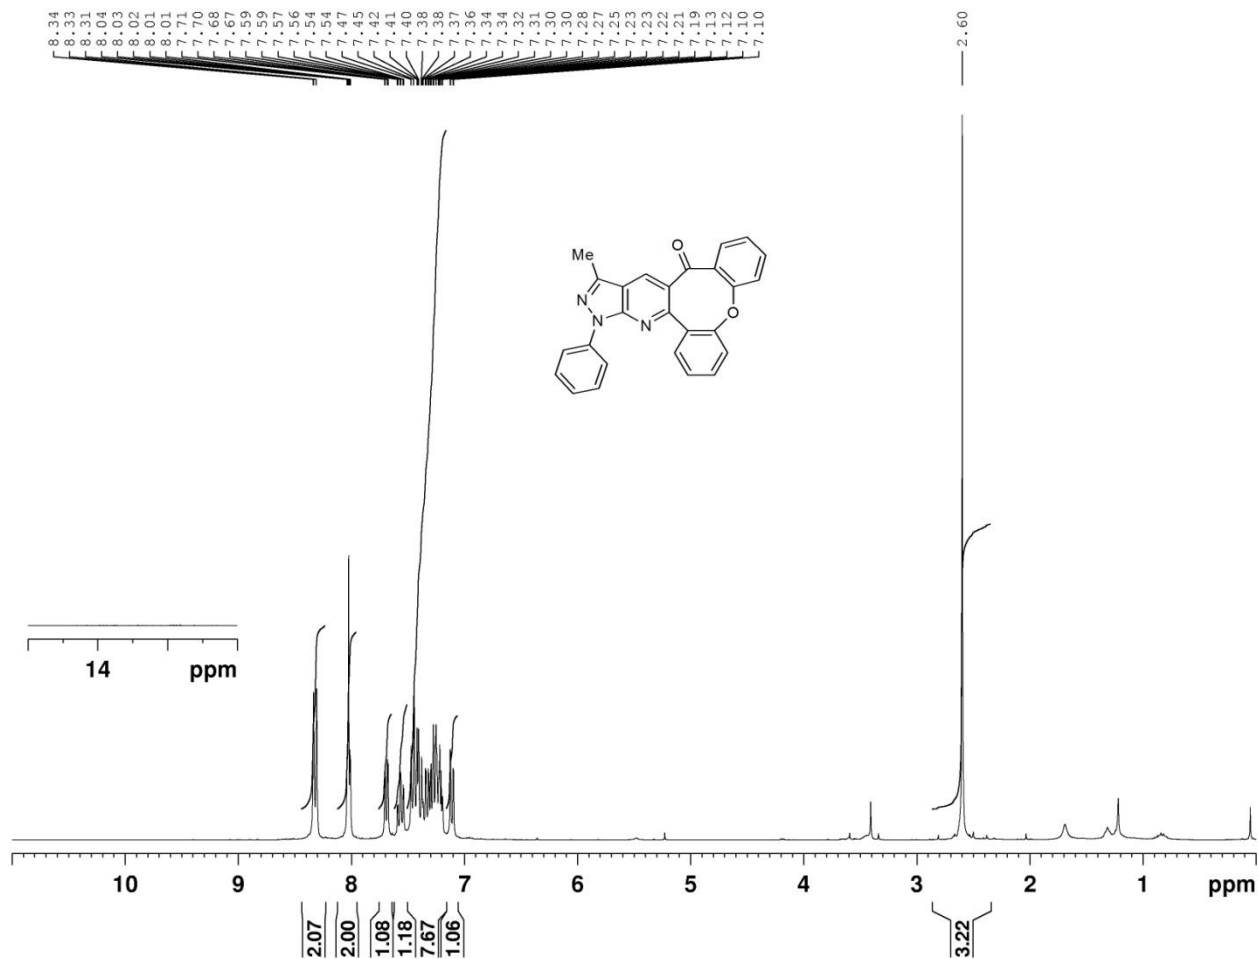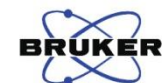

Current Data Parameters  
 NAME 110620.u302 s  
 EXPNO 10  
 PROCNO 1

F2 - Acquisition Parame  
 Date 20110620  
 Time 8.12  
 INSTRUM spect  
 PROBHD 5 mm PABBC  
 PULPROG zg30  
 TD 65536  
 SOLVENT CDC13  
 NS 16  
 DS 2  
 SWH 6188.119 H.  
 FIDRES 0.094423 H  
 AQ 5.2953587 se  
 RG 80.6  
 DW 80.800 usec  
 DE 10.00 usec  
 TE 298.2 K  
 D1 1.00000000 se  
 TD0 1

==== CHANNEL f1  
 NUC1 1H  
 P1 10.00 usec  
 PL1 0 dB  
 PL1W 11.25325108  
 SFO1 300.1318534

F2 - Processing parame  
 SI 32768  
 SF 300.1300264 M  
 WDW EM  
 SSB 0  
 LB 0.30 Hz  
 GB 0  
 PC 1.00

# Compound 7a

Mkrtchyan, SM 497-2-2, DMSO, 13C

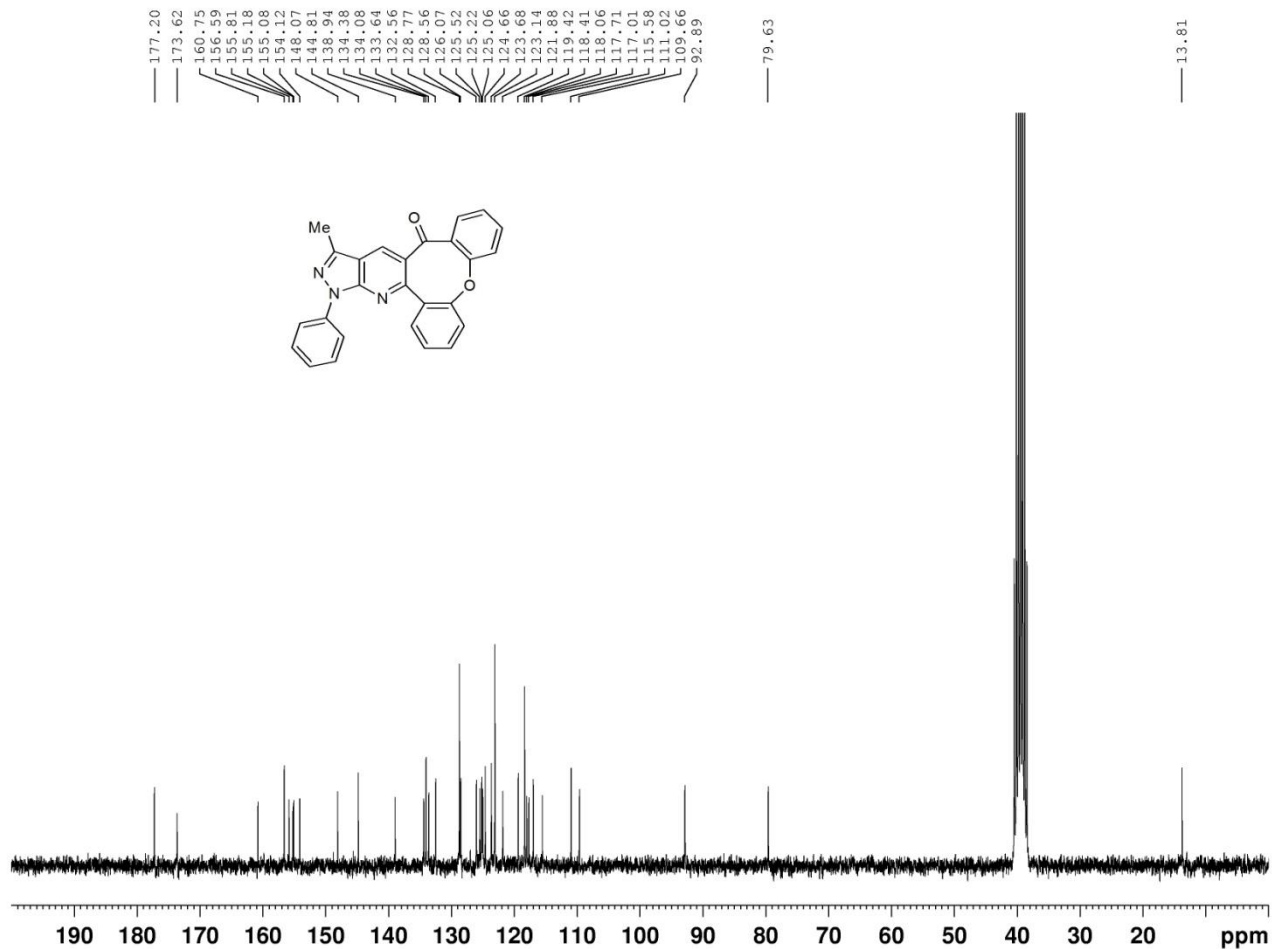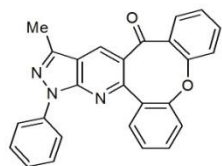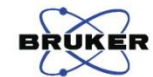

Current Data Param  
 NAME 110622.20  
 EXPNO 10  
 PROCNO

F2 - Acquisition Par  
 Date\_ 201106;  
 Time 2.35  
 INSTRUM spe  
 PROBHD 5 mm Pz  
 PULPROG zgt  
 TD 65536  
 SOLVENT D1  
 NS 2048  
 DS 4  
 SWH 15000.0  
 FIDRES 0.2288  
 AQ 2.184583  
 RG 2050  
 DW 33.333  
 DE 10.00 u  
 TE 299.7 K  
 D1 2.0000000  
 d11 0.0300000  
 DELTA 1.89999  
 TD0 1

===== CHANNE  
 NUC1 13C  
 P1 10.00 u  
 PL1 -1.00 c  
 SFO1 62.9015z

===== CHANNE  
 CPDPRG2 wali  
 NUC2 1H  
 PCPD2 70.0  
 PL12 15.00  
 PL13 15.00  
 PL2 -2.50 c  
 SFO2 250.1310

F2 - Processing par  
 SI 32768  
 SF 62.895269  
 WDW EM  
 SSB 0  
 LB 1.00 H.  
 GB 0  
 PC 1.40

# Compound 7b

Mkrtchyan SM826-1 1H CDC13

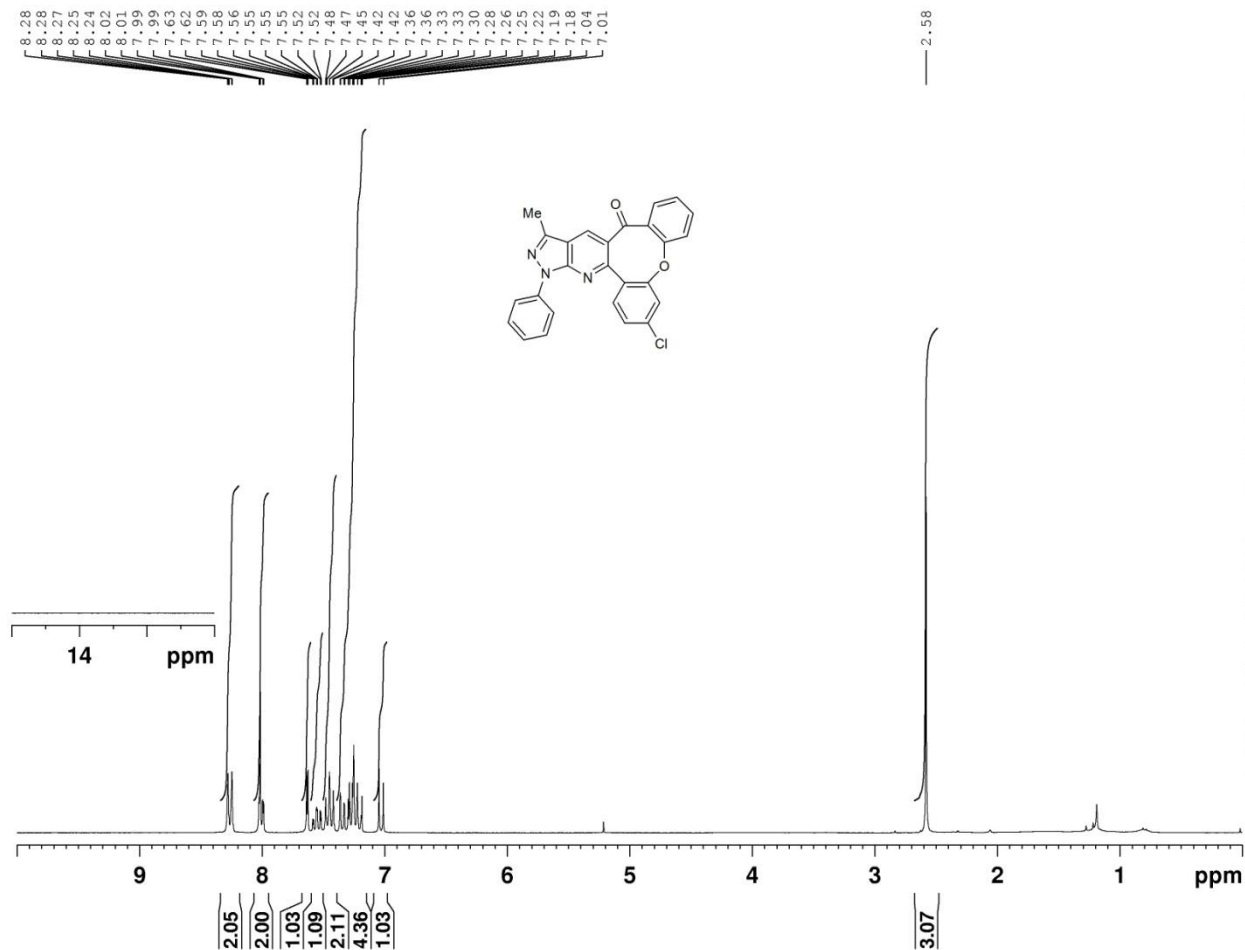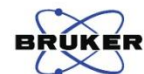

Current Data Parameters  
 NAME 140425.215 sr  
 EXPNO 10  
 PROCNO 1

F2 - Acquisition Parame  
 Date\_ 20140426  
 Time 20.21  
 INSTRUM spect  
 PROBHD 5 mm PABBC  
 PULPROG zg30  
 TD 65536  
 SOLVENT CDCl3  
 NS 16  
 DS 2  
 SWH 5165.289 H.  
 FIDRES 0.078816 H  
 AQ 6.3439350 se  
 RG 287  
 DW 96.800 usec  
 DE 10.00 usec  
 TE 298.2 K  
 D1 1.00000000 se  
 TD0 1

==== CHANNEL f1  
 NUC1 1H  
 P1 10.00 usec  
 PL1 -2.50 dB  
 SFO1 250.1315447

F2 - Processing parame  
 SI 32768  
 SF 250.1300196 M  
 WDW EM  
 SSB 0  
 LB 0.30 Hz  
 GB 0  
 PC 1.00

# Compound 7b

Mkrtchyan SM826-1 13C CDC13

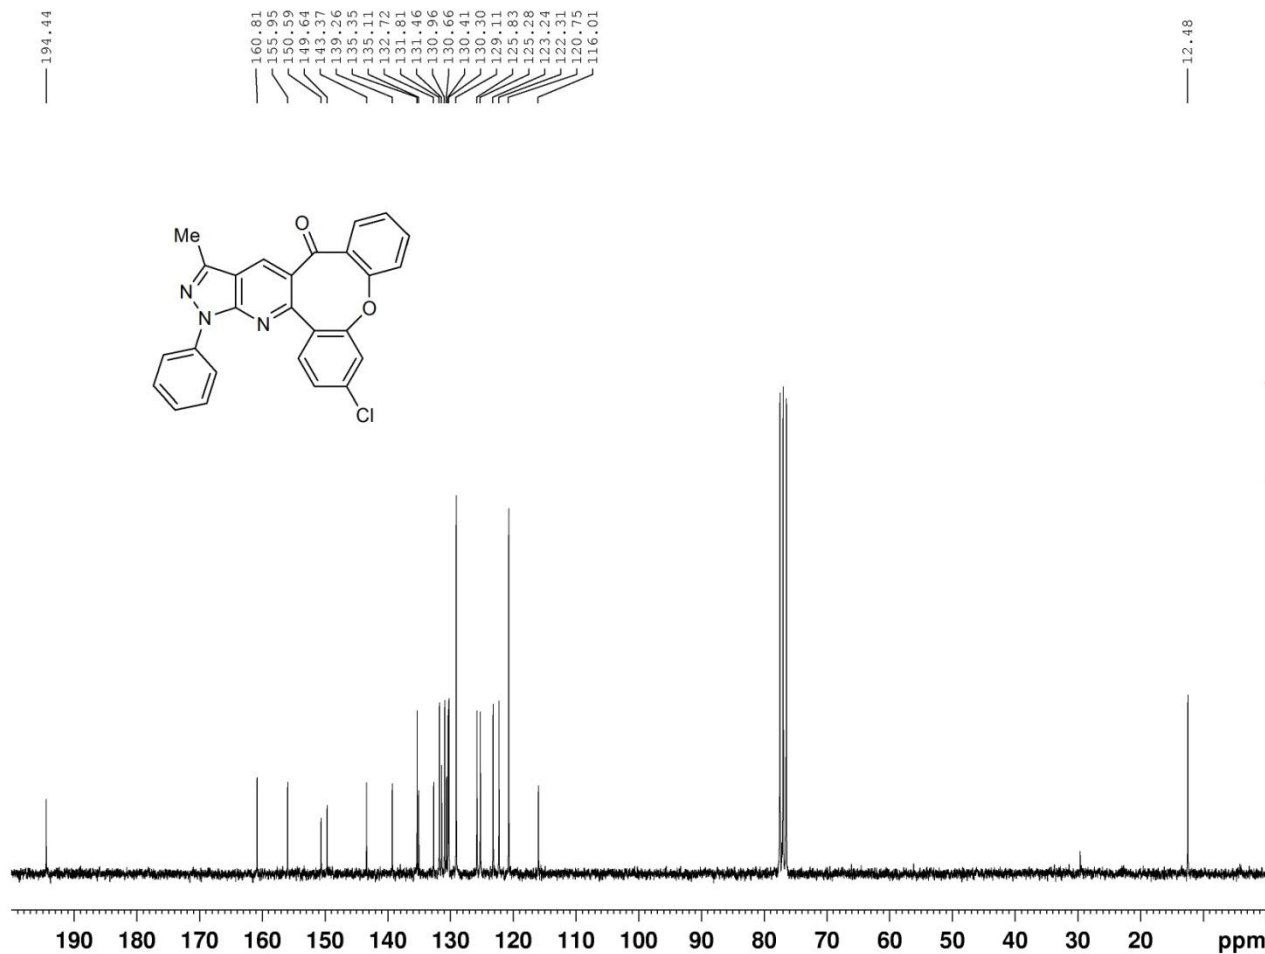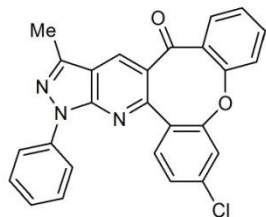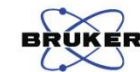

Current Data Parameters  
 NAME 140423.215 s  
 EXPNO 10  
 PROCNO 1

F2 - Acquisition Parameters  
 Date\_ 20140423  
 Time 21.51  
 INSTRUM spect  
 PROBHD 5 mm PAB1  
 PULPROG zgpg3  
 TD 65536  
 SOLVENT CDCl3  
 NS 1024  
 DS 4  
 SWH 15000.000  
 FIDRES 0.228882  
 AQ 2.1845834 s  
 RG 2050  
 DW 33.333 us  
 DE 10.00 use  
 TE 298.0 K  
 D1 2.0000000 s  
 d11 0.0300000 s  
 DELTA 1.8999999  
 TD0 1

===== CHANNEL 1  
 NUC1 13C  
 P1 10.00 usec  
 PL1 -1.00 dB  
 SFO1 62.9015280

===== CHANNEL 2  
 CPDPRG2 waltz1  
 NUC2 1H  
 PCPD2 70.00 usec  
 PL12 15.00 dB  
 PL13 15.00 dB  
 PL2 -2.50 dB  
 SFO2 250.131000

F2 - Processing parameters  
 SI 32768  
 SF 62.8952406 MHz  
 WDW EM  
 SSB 0  
 LB 1.00 Hz  
 GB 0  
 PC 1.40

# Compound 7c

Mkrtchyan SM827 1H CDC13

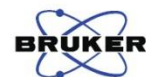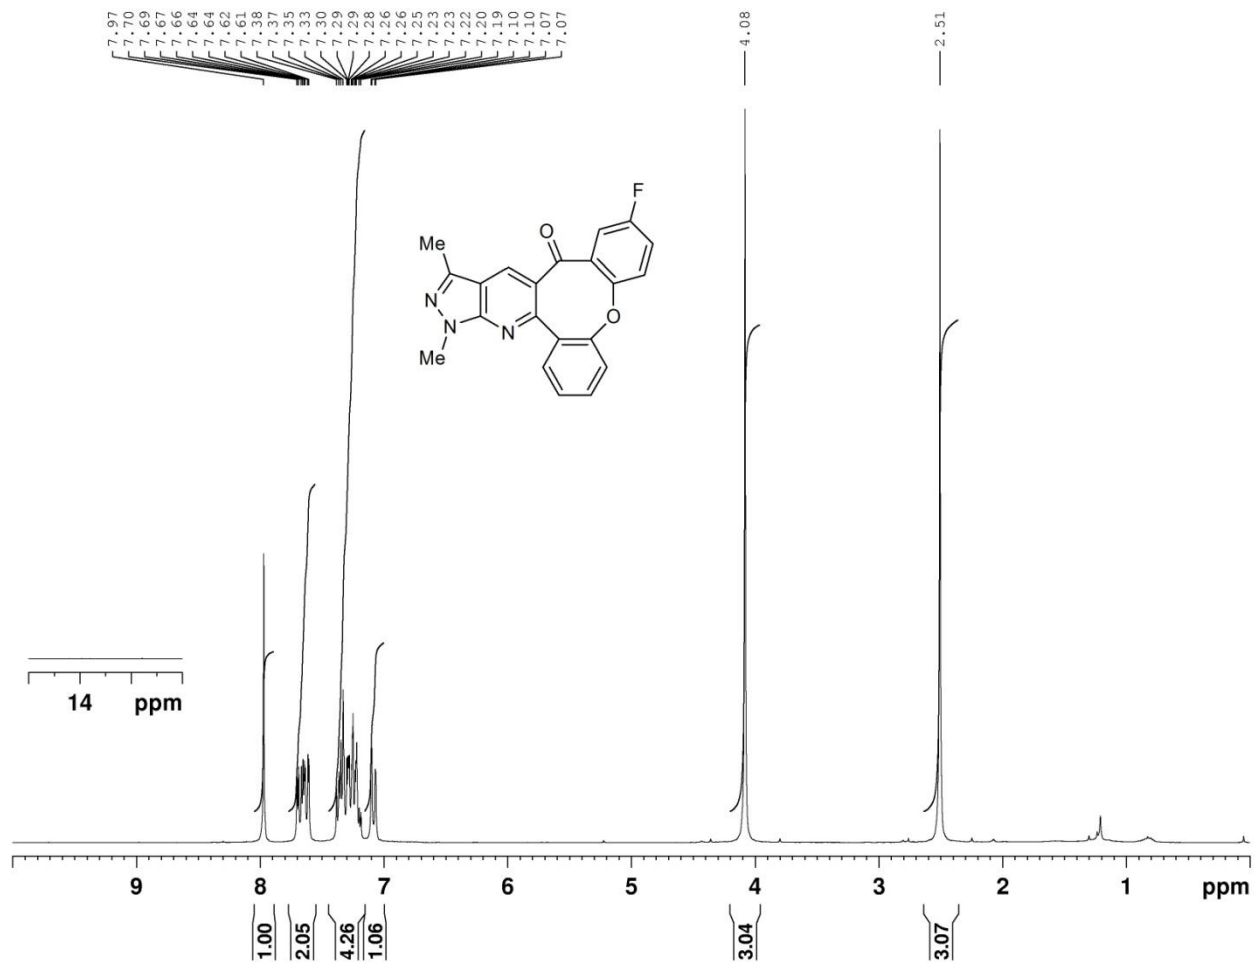

Current Data Paramete.  
 NAME 140423.207 s  
 EXPNO 10  
 PROCNO 1

F2 - Acquisition Param  
 Date 20140423  
 Time 8.56  
 INSTRUM spect  
 PROBHD 5 mm PABE  
 PULPROG zg30  
 TD 65536  
 SOLVENT CDCl3  
 NS 16  
 DS 2  
 SWH 5165.289 kHz  
 FIDRES 0.078816  
 AQ 6.3439350 s  
 RG 144  
 DW 96.800 usec  
 DE 10.00 usec  
 TE 298.1 K  
 D1 1.00000000 s  
 TD0 1

===== CHANNEL f  
 NUC1 1H  
 P1 10.00 usec  
 PL1 -2.50 dB  
 SFO1 250.131544;

F2 - Processing param  
 SI 32768  
 SF 250.1300101 MHz  
 WDW EM  
 SSB 0  
 LB 0.30 Hz  
 GB 0  
 PC 1.00

# Compound 7c

Mkrtchyan SM827 13C CDC13

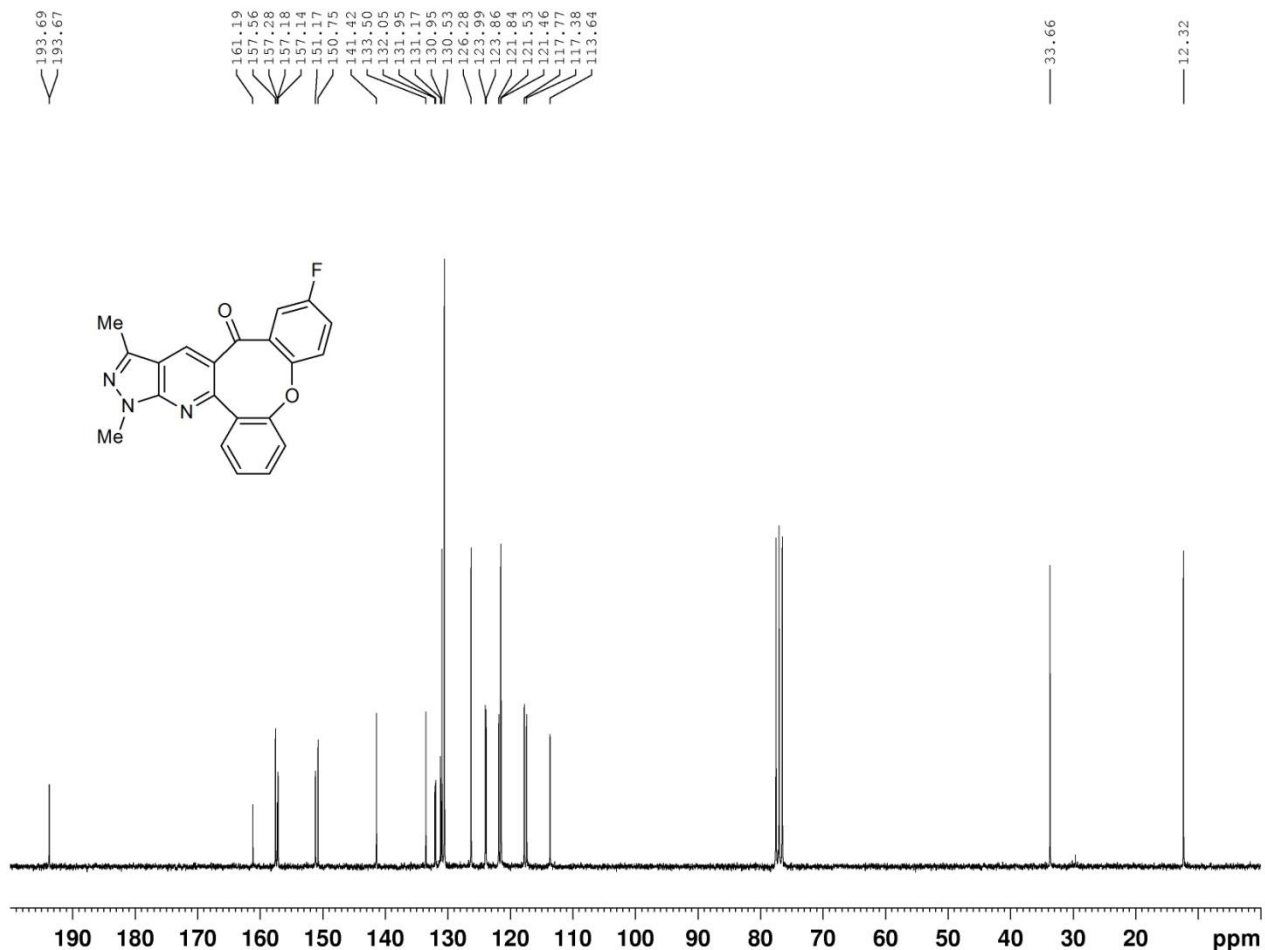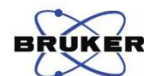

Current Data Parameters  
 NAME 140423.216  
 EXPNO 10  
 PROCNO 1

F2 - Acquisition Parameters  
 Date\_ 20140423  
 Time 23.28  
 INSTRUM spect  
 PROBHD 5 mm PAB  
 PULPROG zgpg  
 TD 65536  
 SOLVENT CDC.  
 NS 1024  
 DS 4  
 SWH 15000.000  
 FIDRES 0.228888  
 AQ 2.1845834  
 RG 2050  
 DW 33.333 us  
 DE 10.00 use  
 TE 297.9 K  
 D1 2.0000000  
 d11 0.0300000  
 DELTA 1.8999999  
 TD0 1

==== CHANNEL  
 NUC1 13C  
 P1 10.00 use  
 PL1 -1.00 dB  
 SFO1 62.901528

==== CHANNEL  
 CPDPRG2 waltz1  
 NUC2 1H  
 PCPD2 70.00 use  
 PL12 15.00 dB  
 PL13 15.00 dB  
 PL2 -2.50 dB  
 SFO2 250.131000

F2 - Processing parameters  
 SI 32768  
 SF 62.8952438  
 WDW EM  
 SSB 0  
 LB 1.00 Hz  
 GB 0  
 PC 1.40



# Compound 7c

Mkrtchyan SM827 Dept CDCl3

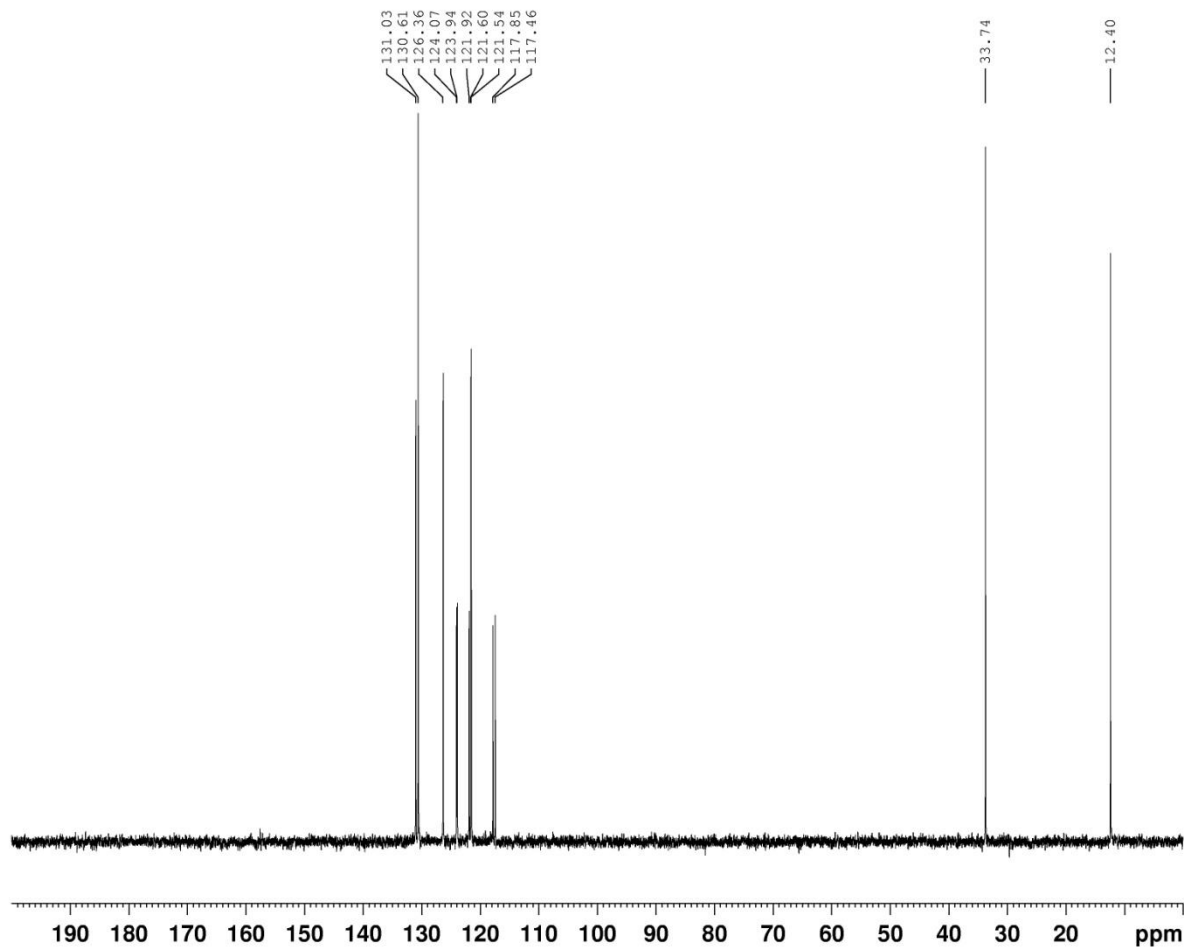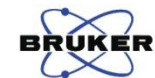

Current Data Parameters  
NAME 7c 140423.216  
EXPNO 11  
PROCNO 1

F2 - Acquisition Parameters  
Date\_ 20140423  
Time 23.47  
INSTRUM spect  
PROBHD 5 mm PABBO BB-  
PULPROG dept135  
TD 65536  
SOLVENT CDCl3  
NS 256  
DS 4  
SWH 15000.000 Hz  
FIDRES 0.228882 Hz  
AQ 2.1845834 sec  
RG 2050  
DW 33.333 usec  
DE 10.00 usec  
TE 297.9 K  
CNST2 145.000000  
D1 2.0000000 sec  
d12 0.00002000 sec  
d2 0.00344828 sec  
DELTA 0.00001273 sec  
TD0 1

===== CHANNEL f1 =====  
NUC1 13C  
P1 10.00 usec  
p2 20.00 usec  
PL1 -1.00 dB  
SFO1 62.9015280 MHz

===== CHANNEL f2 =====  
CPDPRG2 waltz16  
NUC2 1H  
P3 10.00 usec  
p4 20.00 usec  
PCPD2 70.00 usec  
PL12 15.00 dB  
PL2 -2.50 dB  
SFO2 250.1310005 MHz

F2 - Processing parameters  
SI 32768  
SF 62.8952390 MHz  
WDW EM  
SSB 0  
LB 1.00 Hz  
GB 0  
PC 1.40

# Compound 7d

Mkrtchyan SM830-1 1H CDCl3

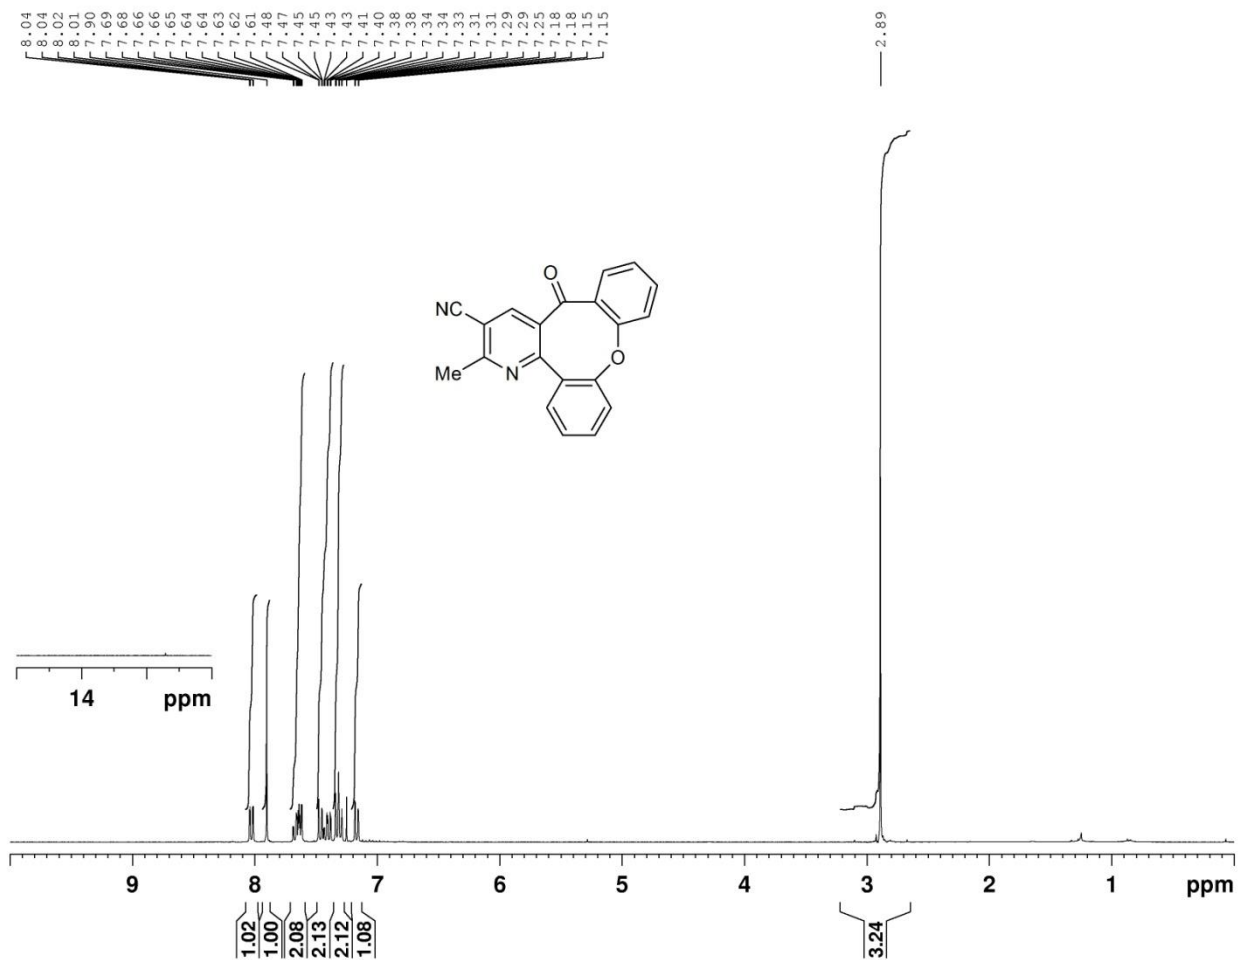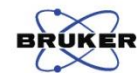

Current Data Parameters  
 NAME 140430.u326.sm  
 EXPNO 10  
 PROCNO 1

F2 - Acquisition Paramete  
 Date\_ 20140430  
 Time 12.44  
 INSTRUM spect  
 PROBHD 5 mm PABBO 1  
 PULPROG zg30  
 TD 65536  
 SOLVENT CDCl3  
 NS 16  
 DS 2  
 SWH 6188.119 Hz  
 FIDRES 0.094423 Hz  
 AQ 5.2953587 sec  
 RG 144  
 DW 80.800 usec  
 DE 10.00 usec  
 TE 298.2 K  
 D1 1.00000000 sec  
 TD0 1

===== CHANNEL f1 =  
 NUIC1 1H  
 P1 10.00 usec  
 PL1 0 dB  
 PL1W 11.25325108 W  
 SFO1 300.1318534 M

F2 - Processing paramete  
 SI 32768  
 SF 300.1300154 MH.  
 WDW EM  
 SSB 0  
 LB 0.30 Hz  
 GB 0  
 PC 1.00

# Compound 7d

Mkrtchyan SM830-1 13C CDC13

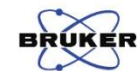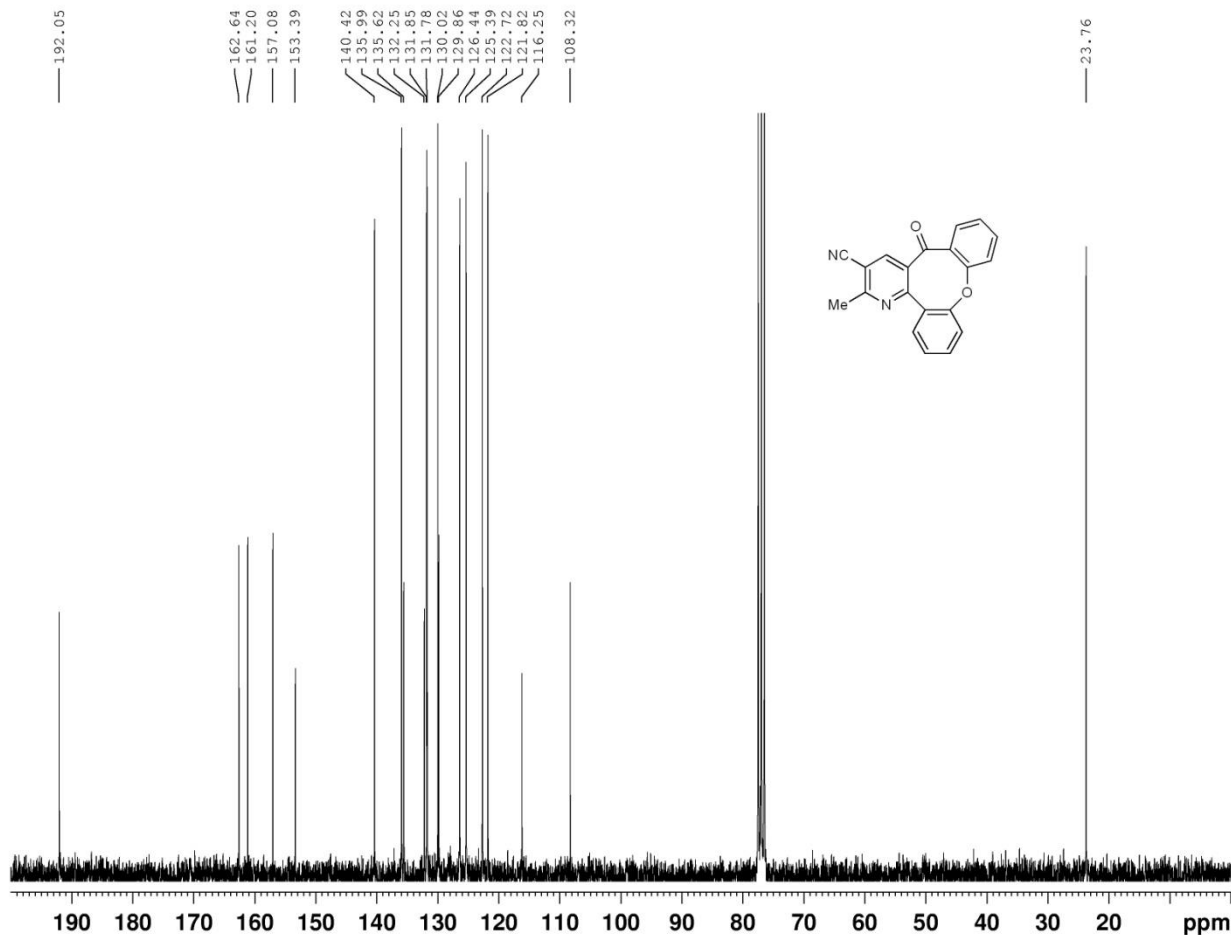

Current Data Parameters  
 NAME 140502.209 sm  
 EXPNO 10  
 PROCNO 1

F2 - Acquisition Paramet  
 Date 20140503  
 Time 5.10  
 INSTRUM spect  
 PROBHD 5 mm PABBC  
 PULPROG zgpg30  
 TD 65536  
 SOLVENT CDCl3  
 NS 1024  
 DS 4  
 SWH 15000.000 H  
 FIDRES 0.228882 F  
 AQ 2.1845834 sec  
 RG 2050  
 DW 33.333 usec  
 DE 10.00 usec  
 TE 298.0 K  
 D1 2.0000000 sec  
 d11 0.03000000 se  
 DELTA 1.89999998 s  
 TD0 1

===== CHANNEL f1  
 NUC1 13C  
 P1 10.00 usec  
 PL1 -1.00 dB  
 SFO1 62.9015280 M

===== CHANNEL f2  
 CPDPRG2 waltz16  
 NUC2 1H  
 PCPD2 70.00 usec  
 PL12 15.00 dB  
 PL13 15.00 dB  
 PL2 -2.50 dB  
 SFO2 250.1310005 M

F2 - Processing paramet  
 SI 32768  
 SF 62.8952407 MHz  
 WDW EM  
 SSB 0  
 LB 1.00 Hz  
 GB 0  
 PC 1.40

# Compound 7d

Mkrtchyan SM830-1 Dept CDCI3

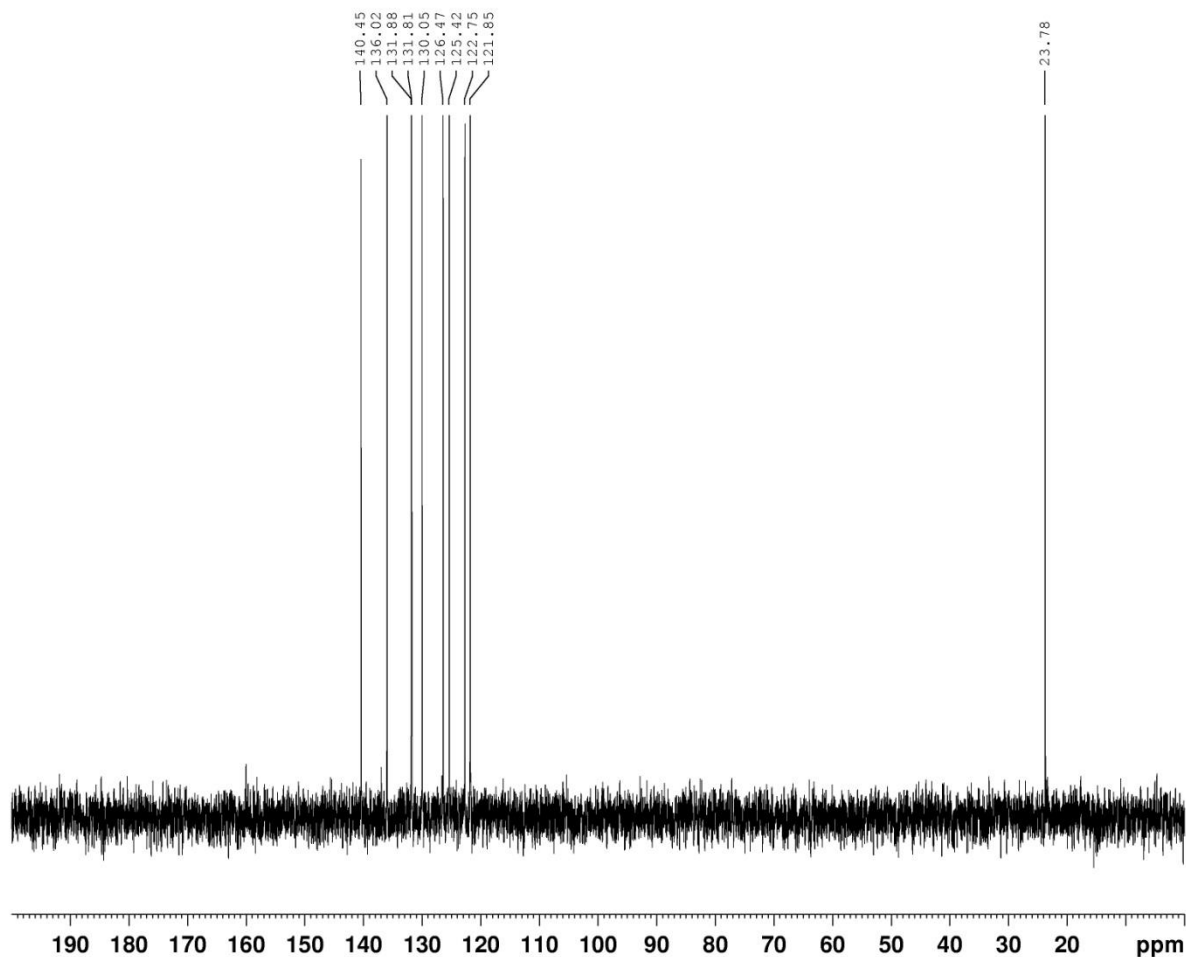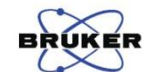

Current Data Parameters  
NAME 7d 140502.209  
EXPNO 11  
PROCNO 1

F2 - Acquisition Parameters  
Date\_ 20140503  
Time 5.29  
INSTRUM spect  
PROBHD 5 mm PABBO BB-  
PULPROG dept135  
TD 65536  
SOLVENT CDCI3  
NS 256  
DS 4  
SWH 15000.000 Hz  
FIDRES 0.228882 Hz  
AQ 2.1845834 sec  
RG 2050  
DW 33.333 usec  
DE 10.00 usec  
TE 298.0 K  
CNST2 145.0000000  
D1 2.00000000 sec  
d12 0.00002000 sec  
d2 0.00344828 sec  
DELTA 0.00001273 sec  
TD0 1

===== CHANNEL f1 =====  
NUC1 13C  
P1 10.00 usec  
p2 20.00 usec  
PL1 -1.00 dB  
SFO1 62.9015280 MHz

===== CHANNEL f2 =====  
CPDPRG2 waltz16  
NUC2 1H  
F3 10.00 usec  
p4 20.00 usec  
PCPD2 70.00 usec  
PL12 15.00 dB  
PL2 -2.50 dB  
SFO2 250.1310005 MHz

F2 - Processing parameters  
SI 32768  
SF 62.8952390 MHz  
WDW EM  
SSB 0  
LB 1.00 Hz  
GB 0  
PC 1.40

# Compound 7e

Mkrtchyan SM829-1 1H CDC13

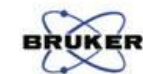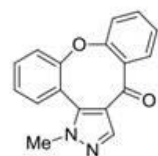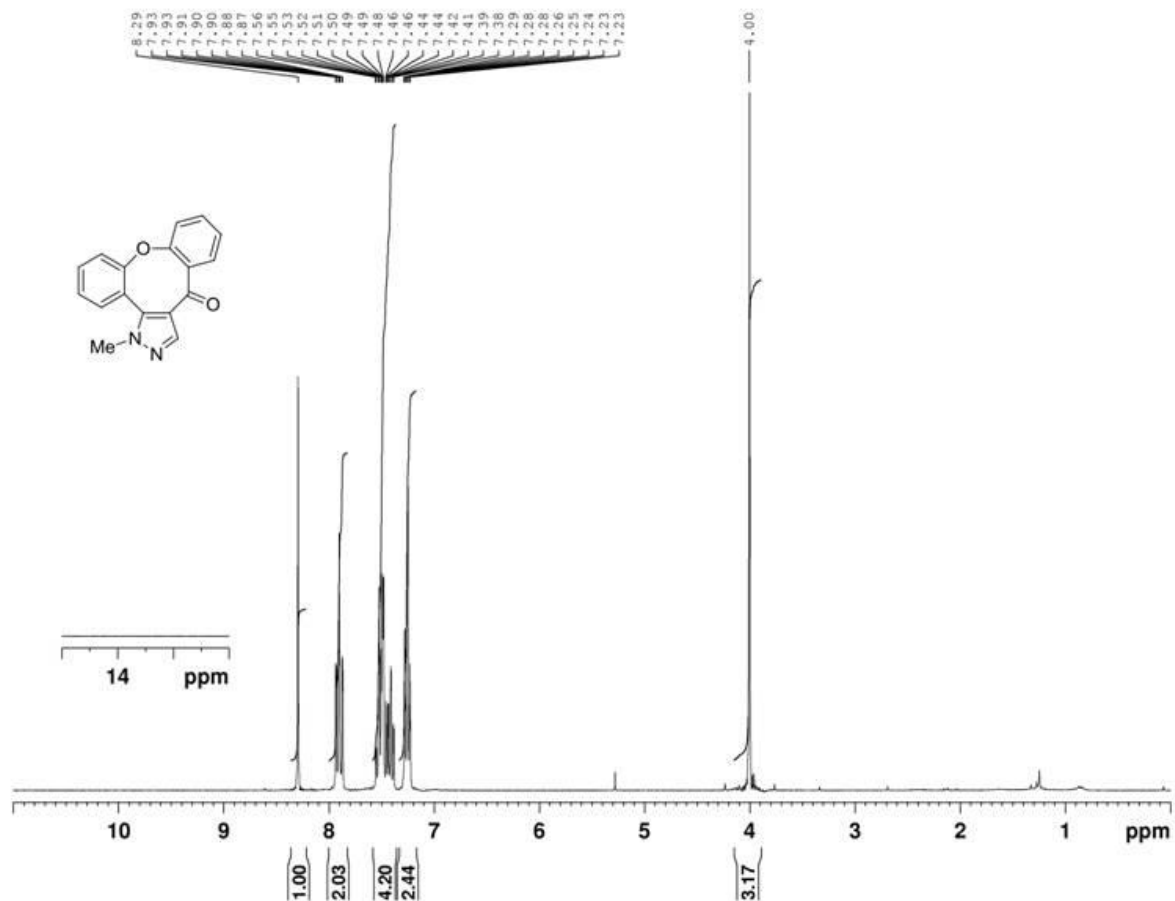

Current Data Parameters  
 NAME 140430.u324.sm  
 EXPNO 10  
 PROCNO 1

F2 - Acquisition Parameters  
 Date\_ 20140430  
 Time 12.25  
 INSTRUM spect  
 PROBHD 5 mm PABBO  
 PULPROG zg30  
 TD 65536  
 SOLVENT CDCl3  
 NS 16  
 DS 2  
 SWH 6188.119 Hz  
 FIDRES 0.094423 Hz  
 AQ 5.2953587 sec  
 RG 144  
 DW 80.800 usec  
 DE 10.00 usec  
 TE 298.2 K  
 D1 1.00000000 sec  
 TDO 1

===== CHANNEL f1 =====  
 NUC1 1H  
 P1 10.00 usec  
 PL1 0 dB  
 PL1W 11.25325108 V  
 SFO1 300.1318534 M

F2 - Processing parameters  
 SI 32768  
 SF 300.1300160 MHz  
 WDW EM  
 SSB 0  
 LB 0.30 Hz  
 GB 0  
 PC 1.00

# Compound 7e

Mkrtchyan SM829-1 13C CDC13

185.40  
158.94  
157.47  
145.65  
137.66  
134.15  
132.08  
131.61  
130.59  
129.42  
126.93  
125.95  
125.69  
123.90  
123.06  
122.27  
39.57

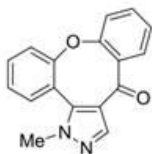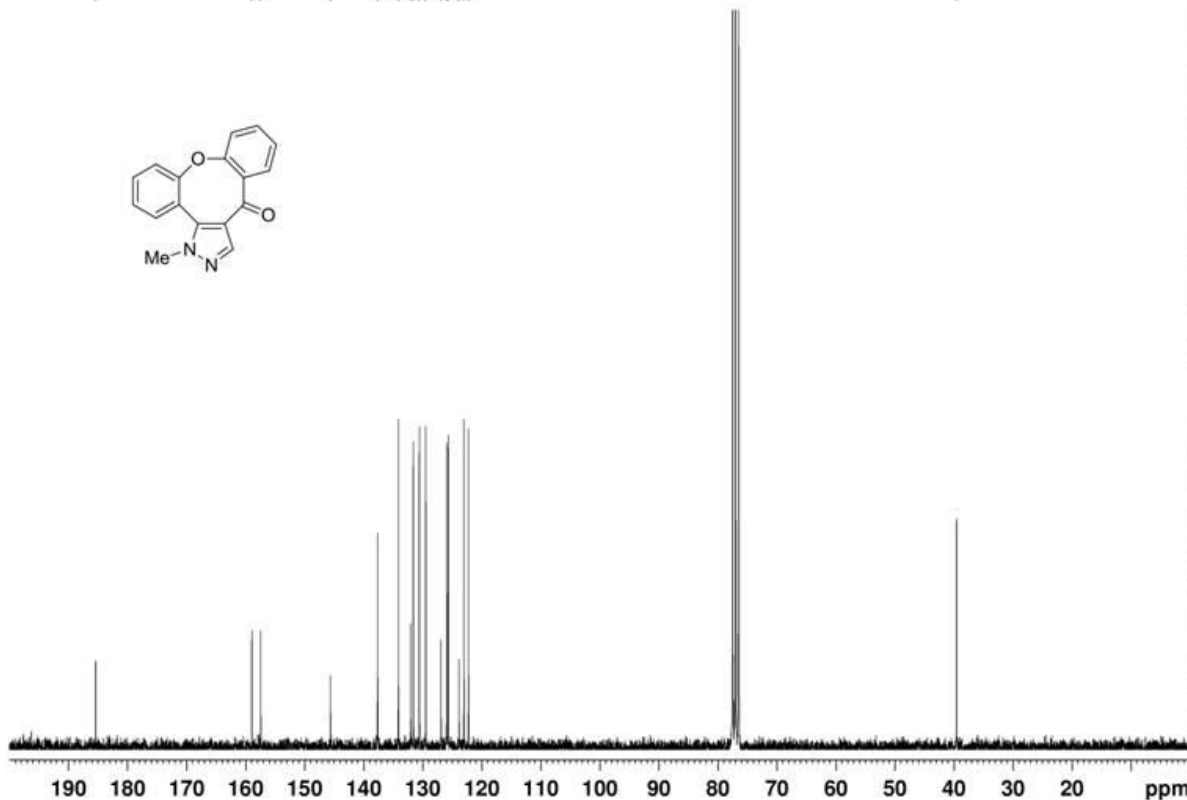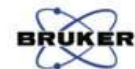

Current Data Parameters  
NAME 140502.207  
EXPNO 10  
PROCNO 1

F2 - Acquisition Parameters  
Date\_ 20140501  
Time 1.55  
INSTRUM spec  
PROBHD 5 mm PAE  
PULPROG zgpg  
TD 65536  
SOLVENT CDC  
NS 1024  
DS 4  
SWH 15000.00  
FIDRES 0.22886  
AQ 2.1845834  
RG 2050  
DW 33.333 u  
DE 10.00 us  
TE 298.0 K  
D1 2.00000000  
d11 0.03000000  
DELTA 1.899999  
TD0 1

===== CHANNEL  
NUC1 13C  
P1 10.00 us  
PL1 -1.00 dB  
SFO1 62.901526

===== CHANNEL  
CPDPRG2 waltz  
NUC2 1H  
PCPD2 70.00  
PL12 15.00 dB  
PL13 15.00 dB  
PL2 -2.50 dB  
SFO2 250.131000

F2 - Processing parameters  
SI 32768  
SF 62.8952402  
WDW EM  
SSB 0  
LB 1.00 Hz  
GB 0  
PC 1.40

# Compound 8a

Mkrtchyan SM828-1 1H CDC13

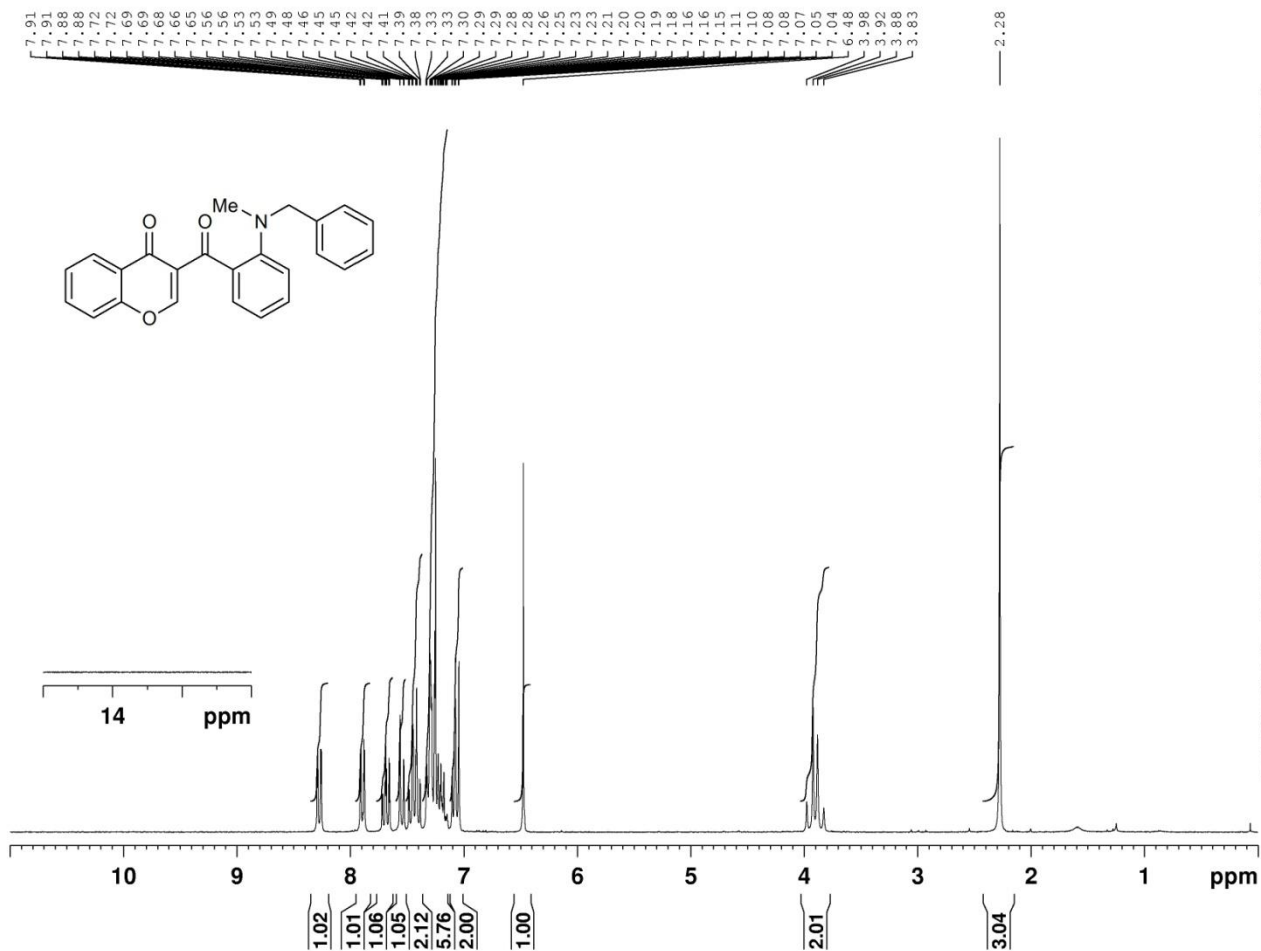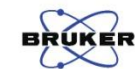

Current Data Paramet  
 NAME 140423.208  
 EXPNO 10  
 PROCNO 1

F2 - Acquisition Parar  
 Date 20140423  
 Time 9.02  
 INSTRUM spec  
 PROBHD 5 mm PAB  
 PULPROG zg3  
 TD 65536  
 SOLVENT CDC  
 NS 16  
 DS 2  
 SWH 5165.289  
 FIDRES 0.07881  
 AQ 6.3439350  
 RG 645  
 DW 96.800 u  
 DE 10.00 us  
 TE 298.0 K  
 D1 1.0000000  
 TD0 1

==== CHANNEL  
 NUC1 1H  
 P1 10.00 us  
 PL1 -2.50 dE  
 SFO1 250.13154

F2 - Processing parar  
 SI 32768  
 SF 250.1300031  
 WDW EM  
 SSB 0  
 LB 0.30 Hz  
 GB 0  
 PC 1.00

# Compound 8a

Mkrtchyan SM828-1 13C CDC13

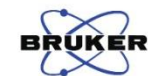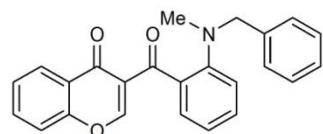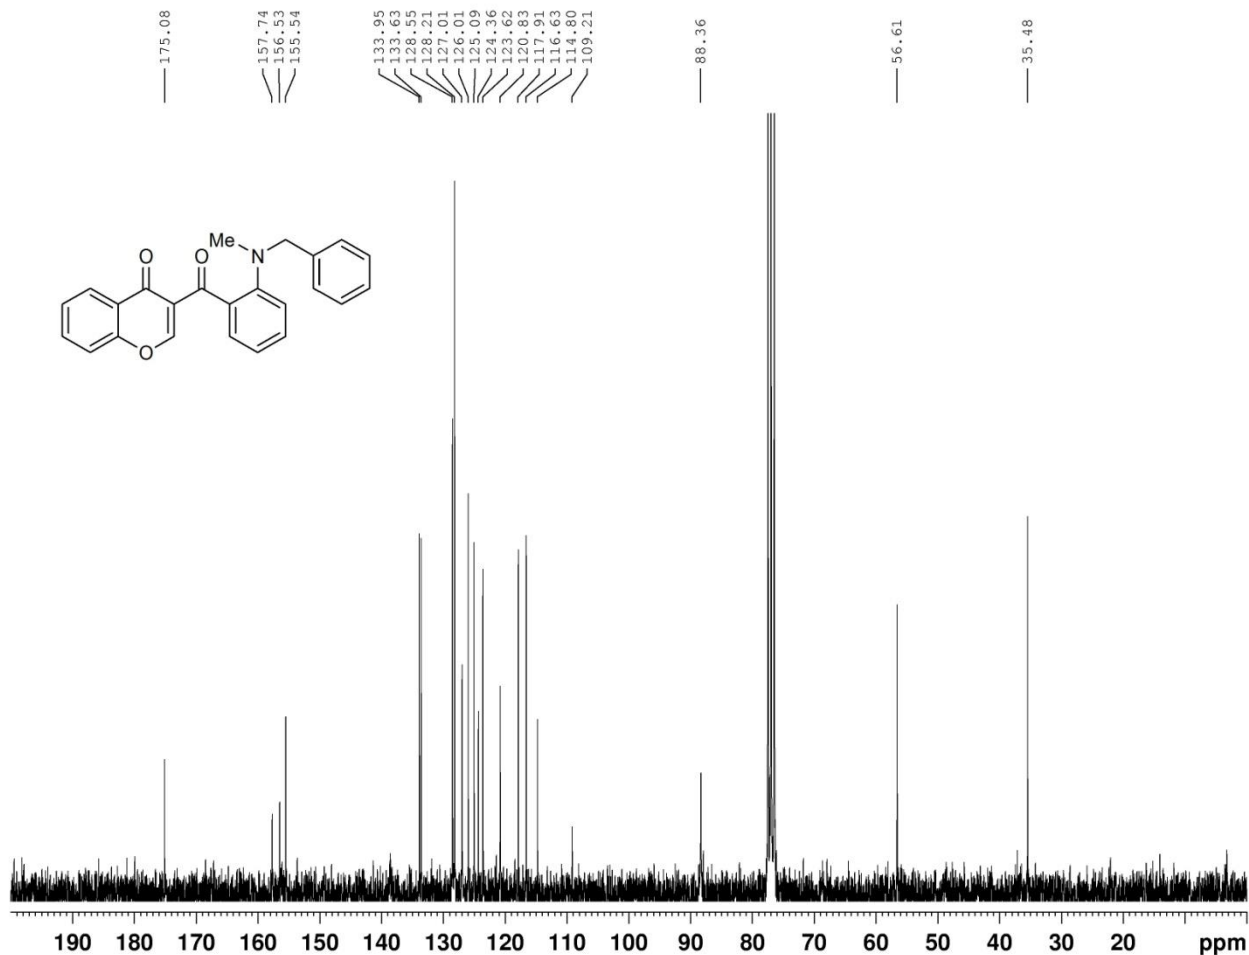

Current Data Parameter  
 NAME 140423.217 sr  
 EXPNO 10  
 PROCNO 1

F2 - Acquisition Parame  
 Date\_ 20140424  
 Time 1.04  
 INSTRUM spect  
 PROBHD 5 mm PABB  
 PULPROG zgpg3t  
 TD 65536  
 SOLVENT CDC13  
 NS 1024  
 DS 4  
 SWH 15000.000 I  
 FIDRES 0.228882  
 AQ 2.1845834 se  
 RG 2050  
 DW 33.333 use  
 DE 10.00 usec  
 TE 298.0 K  
 D1 2.0000000 se  
 d11 0.03000000 si  
 DELTA 1.89999996  
 TD0 1

==== CHANNEL f1  
 NUC1 13C  
 P1 10.00 usec  
 PL1 -1.00 dB  
 SFO1 62.9015280

==== CHANNEL f2  
 CPDPRG2 waltz16  
 NUC2 1H  
 PCPD2 70.00 us  
 PL12 15.00 dB  
 PL13 15.00 dB  
 PL2 -2.50 dB  
 SFO2 250.1310005

F2 - Processing parame  
 SI 32768  
 SF 62.8952388 M  
 WDW EM  
 SSB 0  
 LB 1.00 Hz  
 GB 0  
 PC 1.40



# Compound 8a

Mkrtchyan SM828-1 Dept CDC13

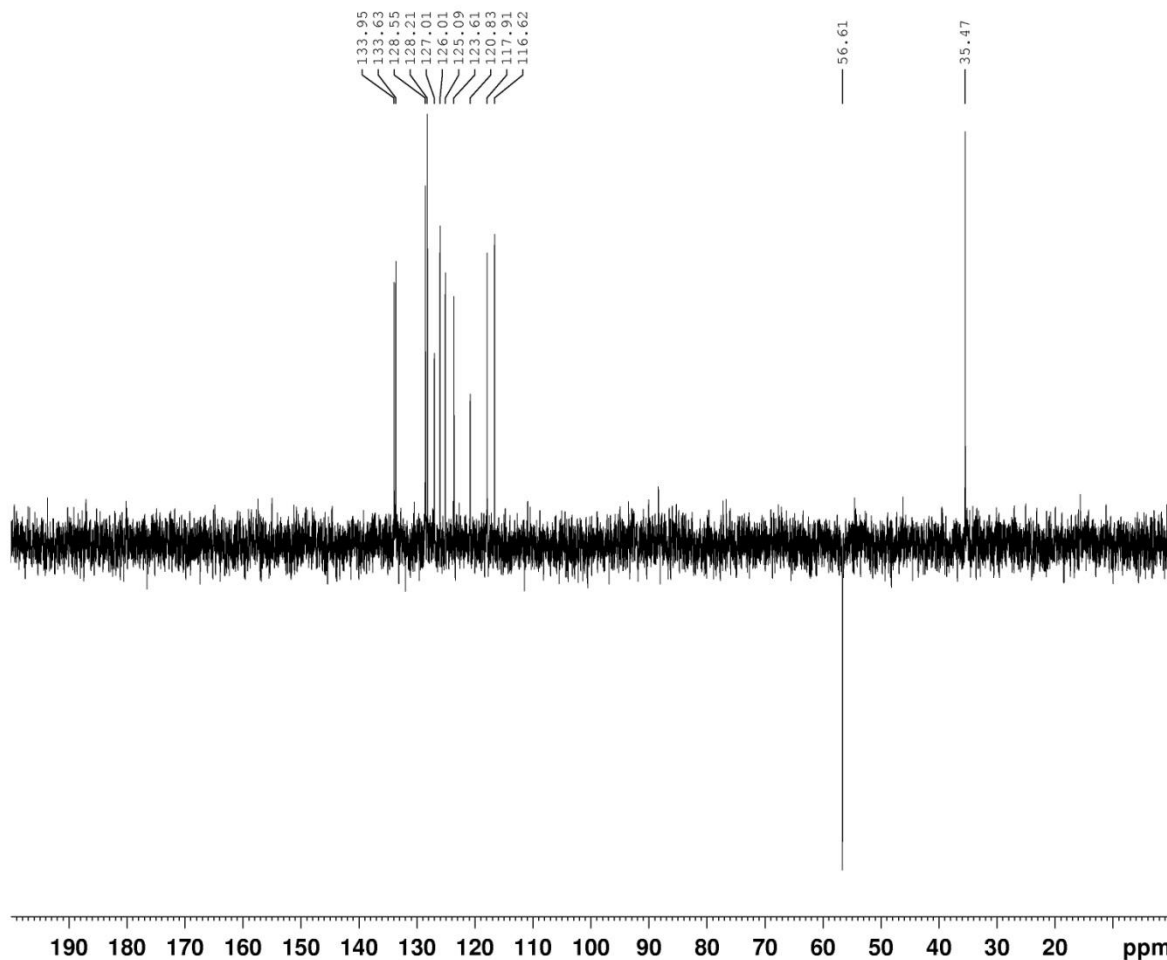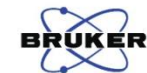

Current Data Parameters  
NAME 8a 140423.217  
EXPNO 11  
PROCNO 1

F2 - Acquisition Parameters  
Date\_ 20140424  
Time 1.24  
INSTRUM spect  
PROBHD 5 mm PABBO BB-  
PULPROG dept135  
TD 65536  
SOLVENT CDC13  
NS 256  
DS 4  
SWH 15000.000 Hz  
FIDRES 0.228882 Hz  
AQ 2.1845834 sec  
RG 2050  
DW 33.333 usec  
DE 10.00 usec  
TE 298.1 K  
CNST2 145.000000  
D1 2.0000000 sec  
d12 0.0002000 sec  
d2 0.00344828 sec  
DELTA 0.0001273 sec  
TD0 1

===== CHANNEL f1 =====  
NUC1 13C  
P1 10.00 usec  
p2 20.00 usec  
PL1 -1.00 dB  
SFO1 62.9015280 MHz

===== CHANNEL f2 =====  
CPDPRG2 waltz16  
NUC2 1H  
P3 10.00 usec  
p4 20.00 usec  
PCPD2 70.00 usec  
PL12 15.00 dB  
PL2 -2.50 dB  
SFO2 250.1310005 MHz

F2 - Processing parameters  
SI 32768  
SF 62.8952390 MHz  
WDW EM  
SSB 0  
LB 1.00 Hz  
GB 0  
PC 1.40

# Compound 9a

Mkrtchyan, R 407, DMSO, 1H

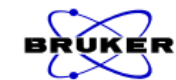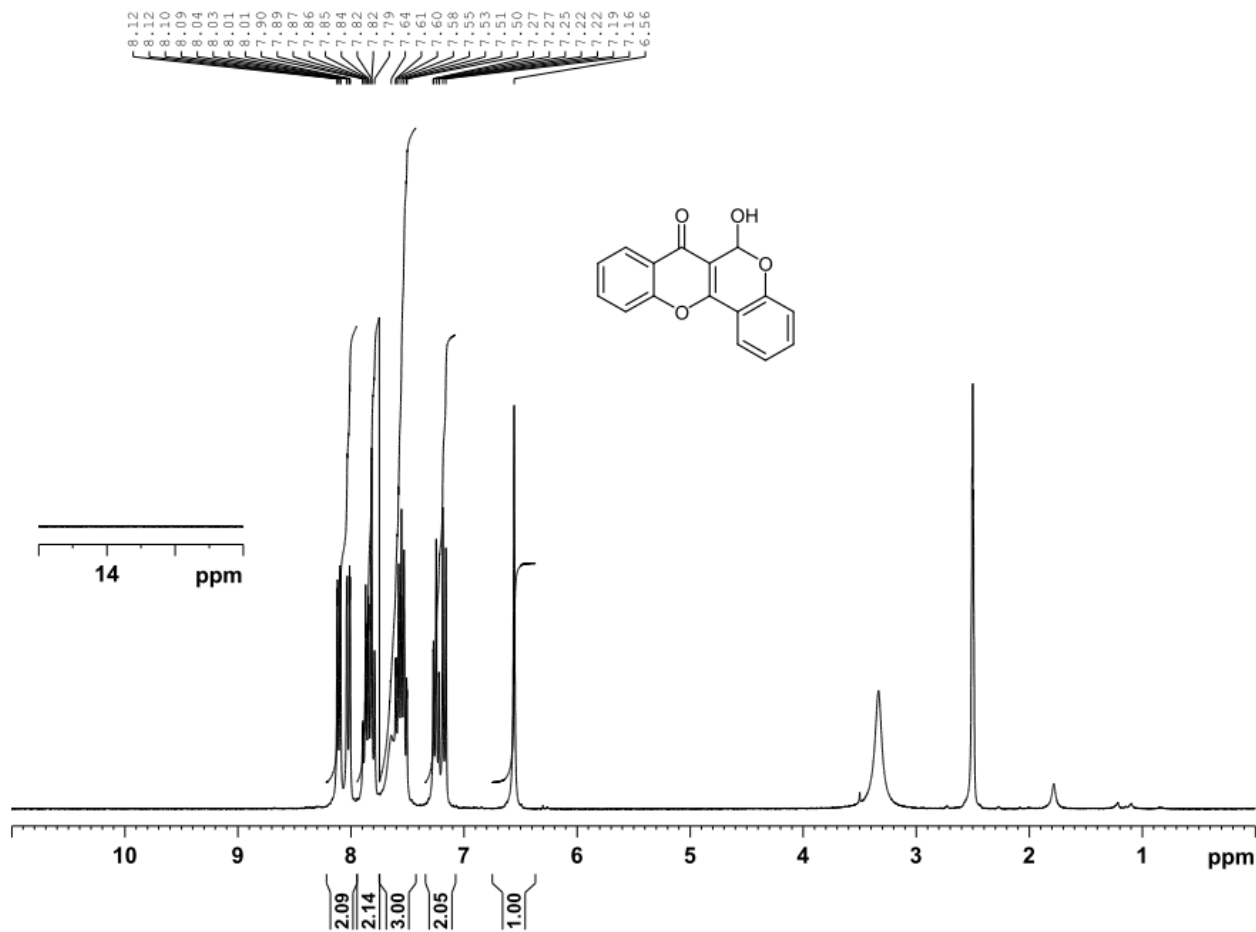

Current Data Parameters  
 NAME 120116.a321 sm 407 r  
 EXPNO 10  
 PROCNO 1

F2 - Acquisition Parameters  
 Date\_ 20120116  
 Time 12.51  
 INSTRUM spect  
 PROBHD 5 mm PABBO BB-  
 PULPROG zg30  
 TD 65536  
 SOLVENT DMSO  
 NS 32  
 DS 2  
 SWH 6188.119 Hz  
 FIDRES 0.094423 Hz  
 AQ 5.2953587 sec  
 RG 287  
 DW 80.800 usec  
 DE 10.00 usec  
 TE 298.2 K  
 D1 1.00000000 sec  
 TD0 1

----- CHANNEL f1 -----  
 NUC1 1H  
 P1 10.00 usec  
 PL1 0.00 dB  
 PL1W 11.25325108 W  
 SFO1 300.1318534 MHz

F2 - Processing parameters  
 SI 32768  
 SF 300.1300067 MHz  
 WDW EM  
 SSB 0  
 LB 0.30 Hz  
 GB 0  
 PC 1.00

# Compound 9a

Mkrtchyan R407 13C DMSO

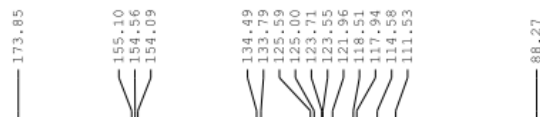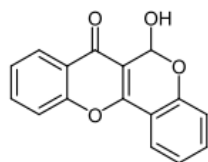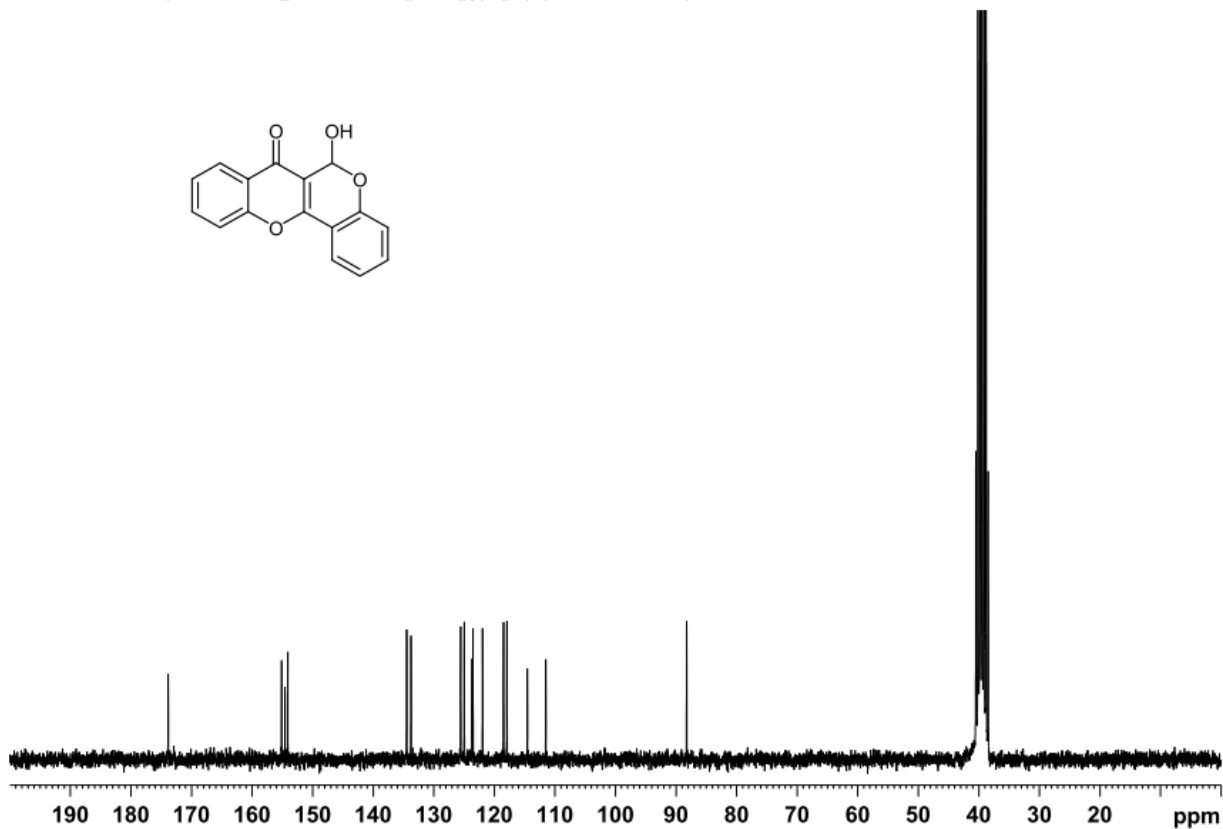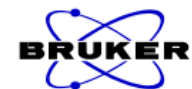

Current Data Parameters  
 NAME 120117.208 sm 407 r c  
 EXPNO 10  
 PROCNO 1

F2 - Acquisition Parameters  
 Date\_ 20120117  
 Time 22.39  
 INSTRUM spect  
 PROBHD 5 mm QNP 1H/13  
 PULPROG zgpg30  
 TD 65536  
 SOLVENT DMSO  
 NS 1600  
 DS 4  
 SWH 15000.000 Hz  
 FIDRES 0.228882 Hz  
 AQ 2.1845834 sec  
 RG 2050  
 DW 33.333 usec  
 DE 10.00 usec  
 TE 298.2 K  
 D1 2.0000000 sec  
 d11 0.0300000 sec  
 DELTA 1.89999998 sec  
 TD0 1

===== CHANNEL f1 =====  
 NUC1 13C  
 P1 10.20 usec  
 PL1 0.00 dB  
 SFO1 62.9015280 MHz

===== CHANNEL f2 =====  
 CPDPRG2 waltz16  
 NUC2 1H  
 PCPD2 70.00 usec  
 PL12 14.00 dB  
 PL13 14.00 dB  
 PL2 -3.00 dB  
 SFO2 250.1310005 MHz

F2 - Processing parameters  
 SI 32768  
 SF 62.8952678 MHz  
 WDW EM  
 SSB 0  
 LB 1.00 Hz  
 GB 0  
 PC 1.40
